# Supplementary material for: Geospatial and Ecological Forces Shaping Multi-omics Shifts in Lycoris aurea (L'Hér.)
Source: Research Square preprint supplement (doi:10.21203/rs.3.rs-7851152/v1), 2026-01-09
Supplement: Supplementary file 1 [file 3873d24268d4b27b33ef6bdb.xlsx]

## Sheet: Table S1
Table S1: Metabolite quantity statistics
Index	Q1 (Da)	Q3 (Da)	Molecular weight (Da)	Formula	Ionization model	Compounds	Class I	Class II	CAS	Level	ZJ-1	ZJ-2	ZJ-3	JX-1	JX-2	JX-3	HN-1	HN-2	HN-3	GX-1	GX-2	GX-3	SC-1	SC-2	SC-3	QC01	QC02	QC03	cpd_ID	kegg_map
Lmjp004702	183	137	182	C9H10O4	[M+H]+	2,4-Dihydroxy-6-methoxyacetophenone	Others	Ketone compounds	3602-54-8	2	153000	58000	63200	175000	186000	179000	132000	72000	15700	184000	68900	183000	62400	24300	6860	94100	94500	93900	-	-
Sadp004383	429	267	428	C24H28O7	[M+H]+	2-((7-hydroxy-3,8-dimethyl-4-vinyl-9,10-dihydrophenanthren-2-yl)oxy)-6-(hydroxymethyl)tetrahydro-2H-pyran-3,4,5-triol	Terpenoids	Ditepenoids	-	2	2630000	1170000	1720000	651000	490000	505000	631000	1010000	443000	428000	401000	584000	891000	588000	376000	860000	868000	863000	-	-
mws0677	219	160	218	C12H14N2O2	[M+H]+	N-Acetyl-5-hydroxytryptamine	Alkaloids	Plumerane	1210-83-9	3	366000	228000	378000	79300	90100	66200	96000	131000	136000	66100	116000	70800	59400	70600	59800	155000	156000	154000	C00978	ko00380,ko01100,ko01110
MWSHY0097	823	531	822	C39H50O19	[M+H]+	Epimedin C	Flavonoids	Flavonols	110642-44-9	1	13600	1740	1580	2060	1410	32700	21500	5670	7570	11400	18100	6850	2840	2270	17000	10300	10400	10400	-	-
MWSmce340	203	132	202	C12H14N2O	[M+H]+	L-Praziquanamine	Alkaloids	Isoquinoline alkaloids	99746-73-3	3	168000	165000	156000	71300	74700	74300	126000	126000	162000	140000	172000	126000	90000	96400	75100	140000	141000	142000	-	-
Zbdn001947	301	123	302	C13H18O8	[M-H]-	Isotachioside	Phenolic acids	Phenolic acids	31427-08-4	3	90700	68800	94000	44000	29300	42500	45500	76400	23100	48800	35000	63800	51500	53300	37700	54700	54600	55300	-	-
Lmtp002474	565	427	564	C26H28O14	[M+H]+	Apigenin-6-C-(2''-glucosyl)arabinoside	Flavonoids	Flavones	-	3	224000	182000	182000	98900	124000	132000	229000	201000	159000	213000	205000	161000	128000	107000	120000	158000	160000	157000	-	-
Lmtn003096	523	361	524	C26H36O11	[M-H]-	Secoisolariciresinol 4-O-glucoside*	Lignans and Coumarins	Lignans	-	1	666000	553000	438000	231000	124000	423000	168000	451000	20500	141000	183000	188000	359000	191000	148000	272000	267000	271000	-	-
Qmdp112410	337	263	336	C21H36O3	[M+H]+	Vitetrifolin H	Terpenoids	Ditepenoids	-	3	1270000	891000	999000	1240000	1330000	1230000	680000	250000	340000	289000	509000	267000	282000	197000	177000	793000	792000	805000	-	-
Wdtp010604	383	267	382	C20H30O7	[M+H]+	3,4,5-trihydroxy-6-(4-octylphenoxy)oxane-2-carboxylic acid	Phenolic acids	Phenolic acids	-	1	208000	210000	206000	228000	207000	211000	202000	206000	216000	221000	229000	204000	221000	211000	210000	215000	219000	218000	-	-
MWStz040	116	70.1	115	C5H9NO2	[M+H]+	Pterolactam*	Alkaloids	Pyrrole alkaloids	38072-88-7	1	8380000	8950000	8400000	3280000	5610000	6530000	5790000	6840000	7230000	4740000	10400000	3940000	4220000	4190000	4160000	7620000	7560000	7460000	-	-
Wcfn008271	239	223	240	C14H8O4	[M-H]-	Danthron; 1,8-Dihydroxyanthraquinone	Quinones	Anthraquinone	117-10-2	2	17700000	17300000	18000000	18700000	15900000	17400000	16300000	17800000	19100000	21200000	20500000	19800000	21500000	24000000	34300000	15900000	15500000	15600000	C10312	-
Zaxn005611	315	315	316	C21H32O2	[M-H]-	Methyl abieta	Terpenoids	Ditepenoids	-	2	137000	119000	164000	93400	75600	96600	135000	145000	238000	176000	132000	207000	480000	445000	328000	185000	190000	188000	-	-
Hmcp009963	180	123	180	C11H18NO+	[M]+	Candicine	Alkaloids	Phenolamine	6656-13-9	1	2150000	2640000	1410000	2410000	1840000	3520000	4160000	3330000	3510000	1850000	2290000	1660000	1380000	1310000	1050000	2230000	2190000	2180000	C10575	-
MEDP1785	181	137	182	C9H10O4	[M-H]-	Methyl vanillate	Phenolic acids	Phenolic acids	3943-74-6	3	43300	56100	68400	28500	30300	23900	35300	54600	37500	41300	48000	42800	15000	24400	30500	29700	29800	29100	-	-
Wcsn010261	383	301	384	C24H32O4	[M-H]-	1-(2,4,6-Trihydroxyphenyl)-6Z,9Z,12Z,15Z-octadecatetraen-1-one	Others	Others	-	1	31200	37600	22400	27800	32900	66900	24500	26400	27200	45300	22700	22600	47300	42500	22700	24000	24600	24100	-	-
Zmsp001102	272	240	271	C16H17NO3	[M+H]+	Crinine	Alkaloids	Isoquinoline alkaloids	-	1	4130000	3430000	3590000	555000	419000	451000	977000	603000	846000	1070000	929000	1240000	92500	62200	76700	1570000	1600000	1610000	-	-
pmf0440	163	91.1	162	C10H10O2	[M+H]+	4-MethoxycinnaMaldehyde	Others	Aldehyde compounds	1963-36-6	3	199000	196000	200000	195000	215000	202000	206000	188000	187000	184000	183000	150000	196000	189000	200000	191000	187000	186000	C10475	-
MWSHY0098	307	139	306	C15H14O7	[M+H]+	Epigallocatechin	Flavonoids	Flavanols	970-74-1	3	364000	327000	393000	169000	162000	145000	160000	440000	592000	99700	164000	146000	106000	99500	44700	219000	221000	215000	C12136	ko00941,ko01110
mws0639	153	109	154	C7H6O4	[M-H]-	2,3-Dihydroxybenzoic Acid*	Phenolic acids	Phenolic acids	303-38-8	3	72600	146000	204000	170000	159000	158000	155000	212000	170000	141000	163000	161000	174000	167000	167000	152000	150000	154000	C00196	ko01110
mws0183	153	109	154	C7H6O4	[M-H]-	3,4-Dihydroxybenzoic acid (Protocatechuic acid)*	Phenolic acids	Phenolic acids	99-50-3	3	72600	146000	204000	170000	159000	158000	155000	212000	170000	141000	163000	161000	174000	167000	167000	152000	150000	154000	C00230	ko01100,ko01110
Zmwp001345	292	230	291	C16H21NO4	[M+H]+	Latifoliumin D	Alkaloids	Isoquinoline alkaloids	-	3	743000	661000	521000	139000	125000	131000	350000	99500	176000	332000	306000	446000	42400	52200	39700	422000	412000	412000	-	-
Lacp002450	316	284	315	C18H21NO4	[M+H]+	Erythratine	Alkaloids	Pyrrole alkaloids	-	2	90800000	62200000	86200000	4020000	1670000	4130000	14200000	18400000	5890000	3460000	2390000	4550000	506000	199000	373000	26100000	26800000	26800000	-	-
Wasn006047	431	251	432	C21H36O9	[M-H]-	Glucosyl 10,11-dihydroxy-2,6-farneSadienoate	Others	Others	-	2	254000	159000	250000	69800	49100	59200	108000	175000	99300	85900	39700	109000	98900	81700	50500	104000	101000	103000	-	-
pmf0314	289	157	290	C20H34O	[M-H]-	cis-Abienol	Terpenoids	Ditepenoids	17990-16-8	3	7580	11100	10500	10300	11300	10300	9270	9380	12600	11100	10500	10500	13500	10600	13100	12200	12500	12100	-	-
Wcfp005519	163	133	162	C9H6O3	[M+H]+	5-hydroxyindene-1,3-dione	Terpenoids	Sesquiterpenoids	131977-61-2	2	8780000	9220000	9750000	8540000	9710000	9980000	10300000	8550000	9310000	8350000	9690000	9330000	9040000	8980000	7560000	9440000	9460000	9200000	-	-
Zmsp002795	334	302	333	C17H19NO6	[M+H]+	8-Demethoxyhostasine	Alkaloids	Plumerane	-	2	26700000	23300000	28300000	13600000	9730000	11900000	642000	759000	466000	24400	1730000	77100	68000	70200	21700	9620000	9510000	9320000	-	-
Lchp000221	207	91.1	206	C11H10O4	[M+H]+	(Z)-3-Ethylidene-7-hydroxy-6-methoxyphthalide*	Others	Others	-	2	225000	199000	230000	79000	85900	72700	133000	146000	169000	113000	172000	90000	107000	101000	76000	145000	141000	144000	-	-
Wccp002868	286	229	285	C16H15NO4	[M+H]+	5,7,20,21-tetraoxa-14-azahexacyclo[16.2.1.02,10.04,8.011,15.011,19]henicosa-2,4(8),9,14-tetraene	Alkaloids	Alkaloids	-	2	1630000	2390000	1740000	17000000	22900000	18000000	2640000	1750000	327000	6320000	5790000	5710000	10300000	10700000	14100000	6730000	6630000	6850000	-	-
Ysjp000315	130	56.1	129	C6H11NO2	[M+H]+	Pipecolic acid	Alkaloids	Piperidine alkaloids	535-75-1	2	63300000	61700000	10700000	32700000	31100000	29000000	16000000	51900000	5790000	27600000	15300000	22300000	26700000	26500000	27500000	46900000	46600000	48000000	-	-
MA10074217	144	115	145	C9H7NO	[M-H]-	4-Hydroxyquinoline	Alkaloids	Quinoline alkaloids	611-36-9	2	229000	287000	270000	150000	182000	192000	219000	174000	363000	206000	283000	169000	154000	141000	152000	268000	263000	259000	C06343	-
Wccp004133	374	254	373	C20H23NO6	[M+H]+	[(1S,13S,15R,18R)-15-hydroxy-5,7-dioxa-12-azapentacyclo[10.5.2.01,13.02,10.04,8]nonadeca-2,4(8),9,16-tetraen-18-yl](3S)-3-hydroxybutanoate	Alkaloids	Alkaloids	-	1	624000	476000	561000	824000	818000	867000	3190000	29400000	3230000	9200000	1510000	7980000	20800000	15500000	18700000	7340000	7110000	7150000	-	-
Wcsn009782	251	251	252	C16H28O2	[M-H]-	(E)-12-hydroxy-2,6,10-trimethyltrideca-2,5-dien-4-one	Others	Others	-	2	125000	111000	131000	123000	147000	142000	85900	72800	43600	58200	54900	37000	58400	39400	43500	100000	102000	98600	-	-
Zmgn004894	151	136	152	C8H8O3	[M-H]-	Methyl 4-hydroxybenzoate*	Phenolic acids	Phenolic acids	99-76-3	3	137000	130000	140000	79400	71800	82700	74900	81600	95600	55200	59400	51500	113000	120000	109000	92900	95100	91900	-	-
mws0458	151	136	152	C8H8O3	[M-H]-	Vanillin; 4-Hydroxy-3-Methoxybenzaldehyde*	Others	Aldehyde compounds	121-33-5	3	137000	130000	140000	79400	71800	82700	74900	81600	95600	55200	59400	51500	113000	120000	109000	92900	95100	91900	C00755	ko00996,ko01100,ko01110
Lhzp110921	272	136	271	C16H17NO3	[M+H]+	Vittatine	Alkaloids	Pyrrole alkaloids	-	2	4610000	8560000	6110000	14700000	18400000	15300000	7180000	8590000	6590000	3020000	5970000	3320000	6390000	8160000	11100000	8120000	7910000	7850000	-	-
Wbsp001941	276	215	275	C17H25NO2	[M+H]+	Obscurumine E	Alkaloids	Alkaloids	-	2	43500000	33900000	37300000	48900000	63100000	57100000	63800000	24100000	7110000	13300000	16600000	14000000	11600000	15400000	15900000	29100000	29300000	30100000	-	-
Zaxn007436	285	285	286	C20H30O	[M-H]-	Pimaradienone*	Terpenoids	Ditepenoids	-	3	403000	387000	380000	397000	411000	462000	411000	475000	505000	414000	361000	379000	431000	433000	418000	337000	342000	330000	-	-
Wcsn011122	279	279	280	C18H32O2	[M-H]-	(5Z,10E,14S)-14-hydroxy-2,6,10-trimethylpentadeca-5,10-dien-4-one	Others	Others	-	1	8280000	7380000	7400000	10600000	13600000	11400000	6790000	4080000	6840000	3430000	4360000	3590000	2750000	1960000	1790000	6610000	6360000	6440000	-	-
Zahp007439	177	149	176	C10H8O3	[M+H]+	3,4-Methylenedioxycinnamaldehyde	Others	Aldehyde compounds	58095-77-5	3	414000	369000	357000	427000	330000	460000	435000	410000	395000	332000	323000	324000	355000	337000	357000	363000	358000	372000	-	-
Wbwn009733	445	59	446	C24H30O8	[M-H]-	Isodunnianin	Lignans and Coumarins	Lignans	144923-90-0	2	160000	177000	217000	212000	216000	228000	183000	190000	195000	180000	216000	182000	178000	179000	185000	171000	165000	171000	-	-
pmp001235	195	79.1	194	C12H18O2	[M+H]+	Cnidilide	Others	Lactones	-	3	63300	52000	45400	70300	48100	74700	88700	71900	73100	45600	57900	44700	55700	89900	71300	60200	61300	62600	-	-
Lmyn000160	237	87	238	C8H14O8	[M-H]-	Mucic acid Dimethyl Ester	Phenolic acids	Phenolic acids	-	1	857000	1020000	833000	1720000	1570000	1840000	1060000	584000	572000	1640000	927000	1550000	3070000	2750000	2610000	1580000	1540000	1610000	-	-
Wcjp002512	286	229	285	C17H19NO3	[M+H]+	2-Methyl-4-(4-hydroxyphenyl)-6-methoxy-7-hydroxy-1,2,3,4-tetrahydroisoquinoline	Alkaloids	Alkaloids	-	1	1810000	2620000	1960000	18100000	22600000	18100000	2840000	1860000	295000	6080000	6810000	5330000	11300000	10400000	13800000	6950000	7220000	6980000	-	-
Zmwp003237	320	260	319	C17H21NO5	[M+H]+	Deacetylbowdensine	Alkaloids	Isoquinoline alkaloids	-	3	404000	404000	580000	422000	362000	378000	1990000	2990000	1280000	183000	1410000	248000	96800	73400	29000	711000	698000	728000	C12169	-
Lskp211279	229	142	228	C10H16N2O4	[M+H]+	Longitubanine A	Alkaloids	Alkaloids	-	2	26700000	25200000	20400000	8240000	8970000	8420000	9140000	7890000	13200000	12700000	8080000	16700000	9590000	8980000	7170000	15900000	15200000	15600000	-	-
Lmgp002501	474	312	473	C20H27NO12	[M+H]+	Dhurrin-6'-O-Glucoside	Alkaloids	Phenolamine	-	2	2360000	923000	1660000	273000	147000	261000	266000	430000	397000	304000	204000	517000	1830000	2390000	1070000	751000	784000	774000	-	-
Wbmp006300	412	412	411	C25H33NO4	[M+H]+	1,2,9,10-tetraethoxy-6-methyl-5,6,6a,7-tetrahydro-4H-dibenzo[de,g]quinoline	Alkaloids	Alkaloids	-	2	23400000	15300000	22000000	1700000	1190000	1600000	6830000	2760000	1540000	459000	527000	713000	1670000	1320000	927000	5000000	5100000	5230000	-	-
Sahp008995	223	195	224	C13H20O3	[M-H]-	Sonnerstigmane D Aglycon	Terpenoids	Sesquiterpenoids	-	2	58700	53800	54300	56700	56400	60700	59100	54800	55600	48400	47600	46800	51600	52000	52100	53200	51400	51000	-	-
pme2828	140	99	139	C6H5NO3	[M+H]+	4-Nitrophenol	Phenolic acids	Phenolic acids	100-02-7	3	12000000	9400000	9500000	13400000	7560000	10700000	6060000	5740000	1350000	9580000	4830000	6540000	9780000	9660000	6210000	8480000	8230000	8100000	C00870	-
pmn001380	187	169	188	C9H16O4	[M-H]-	Eucommiol	Others	Alcohol compounds	55930-44-4	1	153000	248000	295000	194000	135000	133000	204000	174000	318000	216000	128000	363000	276000	305000	259000	215000	222000	212000	C17878	-
Zmsp003381	360	268	359	C19H21NO6	[M+H]+	Ungminorine*	Alkaloids	Isoquinoline alkaloids	102487-18-3	1	777000	460000	1020000	21100000	11800000	16400000	1100000	815000	7200000	99900000	5240000	137000000	549000	571000	469000	22300000	21700000	21300000	-	-
MWSmce364	197	151	196	C10H12O4	[M+H]+	Xanthoxylin*	Phenolic acids	Phenolic acids	90-24-4	1	325000	81600	211000	6700000	8840000	21000000	1510000	280000	117000	10100000	1020000	11900000	3020000	514000	71500	4170000	4210000	4020000	C10726	-
mws0055	373	343	372	C20H20O7	[M+H]+	Tangeretin (4',5,6,7,8-Pentamethoxyflavone)	Flavonoids	Flavones	481-53-8	3	265000	129000	336000	42500	39800	36000	68200	33700	38300	20200	28600	31500	57200	45500	42200	77500	78200	74800	C10190	-
pmb0782	86.1	69.1	85.1	C5H11N	[M+H]+	Piperidine	Alkaloids	Piperidine alkaloids	110-89-4	3	4250000	4880000	5130000	2040000	2400000	2810000	4010000	4160000	3480000	3060000	4000000	2380000	2080000	2070000	1740000	3740000	3770000	3600000	C01746	ko00960
Wcgn012055	333	251	334	C20H30O4	[M-H]-	Araucarolone*	Terpenoids	Ditepenoids	-	3	88100	77600	80100	101000	130000	115000	38700	25700	33100	24200	47200	30200	33700	26300	21600	58400	60500	57800	-	-
pmp001073	168	150	167	C9H13NO2	[M+H]+	Synephrine; 4-[1-Hydroxy-2-(methylamino)ethyl]phenol	Alkaloids	Phenolamine	94-07-5	3	14400000	31200000	12900000	22300000	24300000	22600000	27000000	30800000	27200000	48800000	31500000	37300000	19100000	15300000	20900000	19800000	20800000	20200000	C04548	-
MW0002668	155	127	154	C6H6N2O3	[M+H]+	2-Amino-4-nitrophenol	Phenolic acids	Phenolic acids	-	3	1580000	1570000	1300000	3140000	4390000	3860000	3380000	1460000	694000	880000	1040000	1130000	942000	1150000	1150000	1580000	1550000	1630000	C19321	-
MWS1848	135	92	136	C8H8O2	[M-H]-	Phenyl acetate	Phenolic acids	Phenolic acids	122-79-2	3	34100	47600	46500	45800	48800	37800	52400	39200	62000	51700	44500	50400	78700	64600	84600	48700	46200	47400	C00548	-
Cmmn012997	301	301	302	C20H30O2	[M-H]-	Abietic acid*	Terpenoids	Ditepenoids	514-10-3	2	72800	87800	84800	87100	91600	86400	87600	95400	84000	83900	85300	86900	84200	87200	91700	74100	77200	73400	C06087	ko00904,ko01100,ko01110
Yalp008000	335	81.1	334	C21H34O3	[M+H]+	(2S,3S,5R)-2-[[(1R,4aR,8aR)-5,5,8a-trimethyl-2-methylene-decalin-1-yl]methyl]-5-methoxy-tetrahydrofuran-3-carbaldehyde*	Terpenoids	Ditepenoids	-	1	1360000	736000	980000	616000	724000	582000	292000	167000	143000	92200	196000	98400	141000	225000	165000	473000	496000	473000	-	-
Wcsp002820	348	330	347	C19H25NO5	[M+H]+	nerinine	Alkaloids	Alkaloids	-	2	1540000	1440000	1610000	21600000	18600000	20300000	1790000	754000	1440000	1830000	673000	1950000	846000	648000	631000	4860000	5140000	4990000	-	-
pme2292	89.1	72.1	88.1	C4H12N2	[M+H]+	Putrescine	Alkaloids	Alkaloids	110-60-1	3	388000	359000	379000	458000	409000	850000	358000	356000	381000	334000	336000	357000	369000	353000	360000	368000	353000	349000	C00134	ko00330,ko00470,ko00480,ko00960,ko01100,ko01110,ko02010
Ymjm000152	271	108	272	C12H16O7	[M-H]-	p-Hydroxypheny-β-D-allopyranoside	Phenolic acids	Phenolic acids	-	3	1090000	1210000	977000	1650000	544000	1810000	1300000	520000	1490000	1810000	1120000	1790000	1680000	1760000	1720000	1540000	1580000	1490000	-	-
Wbsp001894	292	274	291	C17H25NO3	[M+H]+	palhinine A*	Alkaloids	Alkaloids	-	2	0	0	0	2100000	2300000	1540000	5400000	19500000	11500000	5510000	5940000	4020000	4480000	2230000	1910000	4850000	5100000	4860000	-	-
Wbmn002291	221	220	222	C14H22O2	[M-H]-	Kobusone	Terpenoids	Sesquiterpenoids	-	1	10800	11700	12300	11000	9590	11500	11900	11300	7250	10100	10100	10200	9130	11300	11800	11500	11300	10900	-	-
MWSHC2022	359	197	361	C15H20O10	[M-H]-	Glucosyringic acid	Phenolic acids	Phenolic acids	33228-65-8	3	52800	24800	45300	103000	81500	92800	168000	186000	88000	19500	26500	34400	46000	55400	26900	50900	53200	53700	-	-
Hmlp002306	189	158	188	C12H16N2	[M+H]+	Dimethyltryptamine	Alkaloids	Plumerane	61-50-7	3	1430000	1390000	1350000	28700	36900	117000	935000	1200000	6350	111000	217000	137000	36100	57700	24800	572000	599000	569000	C08302	-
Lmxp001668	151	91.1	150	C9H10O2	[M+H]+	2-Methoxy-4-ethenylphenol	Phenolic acids	Phenolic acids	7786-61-0	1	153000000	116000000	151000000	1280000	2490000	2360000	2030000	4710000	3640000	1860000	4440000	2080000	2090000	1950000	1450000	26400000	27800000	27700000	C17883	-
Wbsp001883	292	274	291	C16H21NO4	[M+H]+	lyeojaponicumnin A	Alkaloids	Alkaloids	-	2	2400000	2230000	3220000	1210000	1090000	1130000	3780000	38200000	21300000	4450000	4810000	6490000	3770000	2720000	2070000	10400000	11000000	10400000	-	-
Wccp002839	302	147	301	C17H19NO4	[M+H]+	9-O-Demethylhomolycorine	Alkaloids	Alkaloids	6879-81-8	1	392000	196000	433000	31800000	29400000	30700000	26500000	3920000	10800000	49100000	5930000	67000000	226000	124000	138000	16700000	17600000	16800000	-	-
pmb1096	118	91.1	117	C8H7N	[M+H]+	Indole	Alkaloids	Plumerane	120-72-9	2	33000000	30400000	35900000	11700000	13800000	14600000	19500000	25700000	23900000	16700000	24600000	15600000	12800000	11000000	11100000	20300000	21100000	21500000	C00463	ko00380,ko00400,ko00402,ko01100,ko01110
Lshp011008	290	149	289	C16H19NO4	[M+H]+	Sanguinine N-oxide	Alkaloids	Alkaloids	-	1	769000	563000	928000	33600000	38600000	29700000	43700000	23100000	31800000	37000000	28100000	42400000	31500000	31200000	16000000	27100000	26200000	25500000	-	-
Wccp002544	316	181	315	C17H17NO5	[M+H]+	Trispherine	Alkaloids	Alkaloids	-	1	202000	184000	387000	126000	128000	138000	25500000	67500000	89400000	26100000	18200000	29300000	10500000	9460000	10400000	18400000	17800000	18800000	-	-
Wccp003315	316	256	315	C18H21NO4	[M+H]+	Buphandrin	Alkaloids	Alkaloids	-	3	46400000	40900000	43900000	1330000	898000	1230000	3870000	5300000	939000	1570000	879000	2030000	0	0	0	13300000	13000000	13800000	-	-
Zbsn012113	379	295	380	C21H32O6	[M-H]-	Diacetoxy-[6]-gingerdiol	Phenolic acids	Phenolic acids	143615-75-2	2	5150	5890	7730	6290	10400	5990	3600	1910	7570	1740	1740	1670	1600	2150	1130	4290	4150	4040	-	-
pma3649	132	86.1	131	C5H9NO3	[M+H]+	5-Aminolevulinic Acid	Alkaloids	Alkaloids	106-60-5	3	10600000	10700000	11900000	5700000	6960000	8430000	10400000	12600000	10400000	8240000	11200000	7320000	6400000	6330000	1270000	9510000	9870000	10100000	C00430	ko00260,ko00860,ko01100,ko01110,ko01240,ko02010
Hamp011640	256	102	255	C16H33NO	[M+H]+	Hexadecanamide	Alkaloids	Alkaloids	629-54-9	1	34500000	36100000	39500000	38200000	34300000	35100000	34400000	36300000	35200000	32300000	31400000	33300000	32700000	34300000	34200000	32400000	30500000	31200000	-	-
Zdcp003644	251	105	250	C13H18N2O3	[M+H]+	N-Caffeoylputrescine	Alkaloids	Phenolamine	29554-26-5	1	635000	282000	553000	45400	89000	85200	696000	611000	488000	58500	209000	70900	61300	81300	59100	285000	292000	275000	C03002	-
Hmln007772	293	221	294	C17H26O4	[M-H]-	Nordihydrocapsiate	Phenolic acids	Phenolic acids	220012-53-3	1	343000	351000	371000	343000	368000	357000	370000	357000	355000	365000	361000	359000	365000	396000	389000	371000	354000	376000	-	-
Lahp003733	359	197	358	C17H26O8	[M+H]+	Clausenaglycoside A	Phenolic acids	Phenolic acids	-	2	1320000	2430000	1400000	2220000	3250000	11500000	6590000	2270000	1730000	2830000	2980000	1010000	3250000	2710000	3730000	3410000	3620000	3560000	-	-
Xmcn005741	447	315	448	C21H36O10	[M-H]-	patrinioside*	Terpenoids	Sesquiterpenoids	-	2	59500	29700	55400	12900	5080	10900	4430	11300	5560	1080	9370	6340	6600	7230	5190	15800	14900	15800	-	-
zjbp120812	425	365	424	C22H32O8	[M+H]+	Scutebarbolide C*	Terpenoids	Ditepenoids	-	1	27000000	24100000	26500000	28400000	27000000	26200000	24300000	25100000	25100000	23800000	24800000	26800000	25100000	24300000	24900000	25300000	25200000	23800000	-	-
Hmmp002761	560	560	559	C33H53NO6	[M+H]+	γ-Solanine	Alkaloids	Steroid alkaloids	511-37-5	2	2410000	2010000	2430000	528000	2070000	1100000	3800000	2460000	2130000	2270000	2240000	1920000	5550000	4770000	4070000	2510000	2480000	2350000	-	-
Wcsn009756	333	251	334	C20H30O4	[M-H]-	Epoxyeleganolactone*	Others	Others	-	3	106000	67800	96700	93400	130000	119000	35000	11400	25800	31000	60500	31100	30800	27400	25400	58700	58300	62000	-	-
Zbzn008048	293	221	294	C17H26O4	[M-H]-	Embelin	Quinones	Quinones	550-24-3	1	386000	356000	399000	405000	393000	372000	368000	354000	393000	410000	406000	386000	393000	415000	439000	429000	415000	401000	-	-
pme2433	106	88.1	105	C4H11NO2	[M+H]+	Diethanolamine	Alkaloids	Alkaloids	111-42-2	3	132000	159000	116000	282000	275000	360000	84800	79500	161000	97700	103000	65200	114000	122000	118000	189000	190000	179000	C06772	ko00564
Labn005767	503	371	504	C24H40O11	[M-H]-	(6R,9R)-megastigman-4-en-9-ol-3-one O-β-D-(6'-O-β-D-apiofuranosyl)glucopyranoside	Terpenoids	Sesquiterpenoids	-	1	69600	60900	66200	62200	15000	18900	41200	120000	21900	36600	14500	51500	56900	52100	35500	45100	48200	45900	-	-
Zmsp003001	272	226	271	C16H17NO3	[M+H]+	Caranine	Alkaloids	Isoquinoline alkaloids	477-12-3	1	4240000	8220000	5900000	13100000	19100000	13300000	6960000	7910000	5850000	2930000	5830000	3940000	6580000	7290000	9610000	7650000	8200000	7820000	-	-
Lhzp110911	302	226	301	C17H19NO4	[M+H]+	4-O-methylnangustine	Alkaloids	Alkaloids	-	2	46200000	41300000	49300000	1930000	2840000	1910000	27200000	55200000	3660000	1300000	19300000	1750000	250000	146000	105000	19200000	20500000	19300000	-	-
MWSslk051	156	84.1	155	C8H13NO2	[M+H]+	Scopine	Alkaloids	Tropan alkaloids	498-45-3	3	2640000	2910000	2980000	2500000	2720000	2590000	2650000	3170000	2810000	2730000	2630000	2820000	2660000	2620000	2620000	2620000	2810000	2690000	-	-
MWSmce248	163	119	164	C9H8O3	[M-H]-	3-Hydroxycinnamic Acid*	Phenolic acids	Phenolic acids	14755-02-3	1	103000	217000	152000	31700	32600	30300	82100	56200	74400	96800	59500	121000	144000	116000	140000	98000	100000	93300	C12621	ko00360,ko01100
Lmbn002648	163	119	164	C9H8O3	[M-H]-	α-Hydroxycinnamic Acid*	Phenolic acids	Phenolic acids	5801-57-0	1	103000	217000	152000	31700	32600	30300	82100	56200	74400	96800	59500	121000	144000	116000	140000	98000	100000	93300	C02763	ko00360,ko01100
Wcfp007836	302	88.1	301	C18H39NO2	[M+H]+	Tetradecyldiethanolamine	Alkaloids	Alkaloids	18924-66-8	2	465000	406000	408000	501000	454000	525000	502000	448000	416000	364000	380000	413000	363000	450000	465000	1470000	1390000	1380000	-	-
Hmqn004297	479	337	480	C26H40O8	[M-H]-	Pharboside B	Terpenoids	Ditepenoids	-	2	2710	4660	4690	4350	3800	2240	4600	2790	6360	6690	3790	6270	13600	12200	10100	5990	6110	5690	-	-
pme2244	190	118	189	C11H11NO2	[M+H]+	3-Indolepropionic acid	Alkaloids	Plumerane	830-96-6	2	4180000	3590000	4460000	766000	1160000	1180000	1860000	2630000	2690000	1480000	2930000	1230000	884000	821000	748000	2060000	2070000	2200000	-	-
pmf0175	157	157	158	C10H22O	[M-H]-	2-Decanol*	Others	Alcohol compounds	1120-06-5	3	2430000	2750000	2230000	2790000	2460000	2760000	2800000	3200000	2720000	2450000	2520000	2450000	2810000	2870000	2800000	2540000	2650000	2740000	-	-
Hmzp004605	463	301	462	C22H22O11	[M+H]+	Ladanetin-6-O-β-D-glucosid*	Flavonoids	Flavones	-	2	666000	339000	639000	194000	97100	100000	230000	276000	143000	90400	93800	138000	183000	179000	92100	252000	271000	258000	-	-
Lhmp122205	301	245	300	C18H20O4	[M+H]+	5-O-Methyllatifolin*	Others	Others	-	1	57800	49300	65600	67000	61300	62900	68700	57900	54000	62000	61700	58200	56200	55100	42400	63300	61700	58800	-	-
Sayp010368	315	187	314	C20H26O3	[M+H]+	phyllanflexoid A	Terpenoids	Ditepenoids	-	3	719000	716000	699000	802000	756000	734000	706000	704000	765000	818000	753000	797000	777000	497000	599000	692000	649000	649000	-	-
pme2122	112	95.1	111	C5H9N3	[M+H]+	Histamine	Alkaloids	Alkaloids	51-45-6	3	1160000	1140000	1190000	569000	685000	736000	772000	735000	774000	533000	792000	595000	607000	625000	609000	855000	823000	793000	C00388	ko00340,ko01100,ko01110
Lmzp003207	333	153	332	C16H28O7	[M+H]+	(3R,4R)-p-Menth-1-ene-3,4-diol-3-O-β-D-glucoside*	Others	Alcohol compounds	-	3	3230000	2660000	3550000	1370000	942000	1070000	133000	479000	271000	84200	180000	97000	99000	65900	67400	1000000	1040000	960000	-	-
Lamp000484	116	70.1	115	C5H9NO2	[M+H]+	4-Methylazetidine-2-Carboxylic acid*	Alkaloids	Alkaloids	1779725-63-1	1	7970000	9180000	8090000	3280000	5640000	6500000	5710000	6770000	6990000	4860000	10400000	3750000	4090000	4110000	4140000	7620000	7720000	7180000	-	-
Lmsn003522	327	147	328	C19H20O5	[M-H]-	Uvafzelic acid	Others	Others	77744-55-9	2	37900	56600	33700	86700	122000	117000	84800	74500	12900	54300	43900	82600	138000	141000	134000	72900	69000	67700	-	-
mws2212	179	135	180	C9H8O4	[M-H]-	Caffeic acid	Phenolic acids	Phenolic acids	331-39-5	2	345000	493000	630000	182000	214000	168000	377000	336000	107000	617000	597000	659000	1250000	1300000	895000	430000	402000	404000	C01197	ko00940,ko01100,ko01110
Lman002731	341	135	342	C15H18O9	[M-H]-	Grevilloside F	Phenolic acids	Phenolic acids	1094004-50-8	1	157000	102000	143000	36600	40100	43400	124000	61600	45200	148000	94600	218000	175000	206000	122000	97600	104000	97700	-	-
Zjbn102543	475	179	476	C28H28O7	[M-H]-	Bletilols B	Others	Others	-	1	49500	46700	44000	61600	39500	78600	68900	38400	6930	18300	14500	40200	41400	22500	26300	36000	34600	37300	-	-
Wagp001323	180	121	179	C11H17NO	[M+H]+	4-[2-(1-methylethyl)aminoethyl]phenol	Alkaloids	Quinoline alkaloids	-	2	2210000	2140000	2840000	533000	456000	514000	64600	17800	133000	73300	34100	14300	132000	113000	154000	920000	922000	984000	-	-
Wbkp012886	425	365	424	C22H32O8	[M+H]+	(1S,3R,3a1S,8R,10S,11aS)-1,5,10-trihydroxy-3,3a1,8,11a-tetramethyl-2,11-dioxohexadecahydrodibenzo[de,g]chromen-4-yl acetate*	Terpenoids	Ditepenoids	-	1	26500000	27500000	28800000	28000000	30800000	27800000	25400000	24100000	25700000	27000000	24900000	26700000	25300000	25700000	25200000	27200000	26400000	25200000	-	-
Lmqn002978	207	135	208	C10H8O5	[M-H]-	Fraxetin (7,8-Dihydroxy-6-methoxycoumarin)	Lignans and Coumarins	Coumarins	574-84-5	2	169000	185000	212000	130000	89700	111000	201000	213000	204000	238000	153000	216000	120000	128000	88400	188000	174000	183000	C09265	ko00999,ko01110
Zmsp007138	264	206	263	C16H9NO3	[M+H]+	Hippadine	Alkaloids	Plumerane	52886-06-3	1	5910	10400	7060	161000	58000	2060000	1470000	59500	23000	82200	689000	15800	25300	61900	49300	326000	314000	301000	-	-
mws4002	154	137	153	C8H11NO2	[M+H]+	Dopamine	Alkaloids	Phenolamine	51-61-6	3	3190000	3670000	6610000	190000	70000	101000	84800	108000	143000	52600	92900	23800	27200	53400	35800	995000	1070000	1020000	C03758	ko00350,ko00950,ko00965,ko01100,ko01110
Zjyp110109	181	121	180	C11H16O2	[M+H]+	oxyphyllone F	Terpenoids	Sesquiterpenoids	-	3	411000	198000	118000	316000	123000	460000	384000	363000	325000	171000	177000	120000	238000	206000	196000	260000	243000	243000	-	-
Laln002027	431	137	432	C18H24O12	[M-H]-	3,4-dihydroxybenzaldehyde-xylose-glucoside*	Phenolic acids	Phenolic acids	-	2	42300	26800	41100	10100	13600	11300	2900	2760	8650	847	1400	968	5670	4140	2400	14900	15200	16100	-	-
Lakn002075	431	137	432	C18H24O12	[M-H]-	4-Hydroxybenzoic acid glucosyl xyloside*	Phenolic acids	Phenolic acids	-	2	42300	26800	41100	10100	13600	11300	2900	2760	8650	847	1400	968	5670	4140	2400	14900	15200	16100	-	-
Yajn003638	377	197	378	C16H26O10	[M-H]-	Lamiol	Terpenoids	Monoterpenoids	-	2	82100	84400	75700	76800	67800	70100	78000	76100	73300	72500	81400	77400	71200	70500	62300	72200	72000	77200	-	-
Zblp001009	272	110	271	C12H17NO6	[M+H]+	3-pyridine-methanol-O-β-D-glucopyranosyl*	Alkaloids	Pyridine alkaloids	-	2	2410000	1200000	1390000	180000	160000	149000	489000	1070000	226000	129000	193000	135000	133000	96000	67700	574000	608000	619000	-	-
MWSslk208	301	301	302	C20H30O2	[M-H]-	Kaurenoic Acid*	Terpenoids	Ditepenoids	6730-83-2	1	243000	256000	247000	248000	252000	305000	275000	265000	284000	274000	247000	281000	271000	272000	263000	297000	277000	278000	C11874	ko00904,ko01100,ko01110
Wcsp003173	310	229	309	C14H15NO7	[M+H]+	trans-dihydronarciclasine	Alkaloids	Alkaloids	40042-05-5	2	2530000	1360000	2070000	452000	361000	423000	480000	1310000	1340000	342000	336000	449000	622000	513000	383000	866000	939000	902000	-	-
Wcdp011133	265	69.1	264	C18H32O	[M+H]+	Linolenyl Alcohol	Others	Others	506-44-5	2	2920000	2570000	2730000	3020000	2300000	2820000	2470000	2550000	2270000	2150000	2210000	2450000	2530000	2170000	1990000	2300000	2130000	2160000	-	-
MWSHY0176	301	181	300	C17H16O5	[M+H]+	Farrerol (6,8-Dimethyl-5,7,4'-trihydroxyflavanone)*	Flavonoids	Flavanones	24211-30-1	3	183000	2990000	17800	222000	46400	1800000	1360000	9000	21500	10000	70900	15600	509000	140000	106000	476000	448000	442000	C09734	-
Saln000494	563	503	564	C27H32O13	[M-H]-	6-O-E-P-Methoxycinnamoyl Scandoside Methyl Ester	Terpenoids	Monoterpenoids	-	3	3800000	3520000	3900000	8140000	3300000	7140000	3340000	2910000	1490000	2750000	1450000	3890000	6620000	7400000	11100000	4160000	3990000	3830000	-	-
Zmyn003394	181	166	182	C9H10O4	[M-H]-	2',6'-Dihydroxy-4'-methoxyacetophenone	Others	Ketone compounds	7507-89-3	2	153000	48700	60800	183000	194000	168000	135000	72300	9170	197000	74600	186000	56800	17400	4190	100000	103000	94700	C10680	-
mws0005	161	144	160	C10H12N2	[M+H]+	Tryptamine	Alkaloids	Plumerane	61-54-1	3	220000	285000	283000	56700	60300	68700	116000	180000	134000	110000	199000	99000	75600	67500	64800	155000	144000	155000	C00398	ko00380,ko00901,ko01100,ko01110
Yhhn011469	299	299	300	C20H28O2	[M-H]-	hemerocallal A	Terpenoids	Ditepenoids	-	2	1910000	1800000	1800000	1900000	1940000	1920000	1940000	1850000	1850000	1830000	1770000	1740000	1730000	1720000	1720000	1930000	1880000	1780000	-	-
Zmsp001274	288	199	287	C17H21NO3	[M+H]+	Epigalanthamine	Alkaloids	Alkaloids	-	2	12900000	8900000	11400000	2610000	3170000	4200000	1780000	1160000	3480000	4600000	2040000	6130000	9260000	6350000	2730000	6890000	7430000	7390000	-	-
Wcsn010349	359	277	360	C22H32O4	[M-H]-	Moniliferanone D	Others	Others	-	1	3550000	3030000	3490000	2760000	3710000	2820000	1890000	1040000	1610000	795000	1470000	824000	793000	534000	341000	2260000	2200000	2080000	-	-
Wbmn010531	377	317	378	C22H34O5	[M-H]-	Previtexilactone	Terpenoids	Ditepenoids	61263-52-3	2	298000	360000	435000	452000	673000	350000	255000	95800	455000	106000	115000	113000	96200	126000	64000	245000	255000	234000	-	-
Zbzn010406	373	273	374	C21H26O6	[M-H]-	Hydroxyshikonofuran C	Quinones	Quinones	-	2	16100	27300	28200	15000	11700	14500	9150	6400	20800	4260	2910	4270	5500	6280	6620	10600	11300	11500	-	-
Zmhn002422	355	193	356	C16H20O9	[M-H]-	1-O-Feruloyl-β-D-glucose*	Phenolic acids	Phenolic acids	7196-71-6	1	508000	147000	520000	30800	27300	30800	44800	52400	52700	166000	243000	184000	51200	42200	25800	140000	136000	129000	C17759	-
MWSHC2062	355	193	356	C16H20O9	[M-H]-	Ferulic β-glucoside*	Phenolic acids	Phenolic acids	14364-12-6	1	508000	147000	520000	30800	27300	30800	44800	52400	52700	166000	243000	184000	51200	42200	25800	140000	136000	129000	-	-
Yacp000453	116	70.1	115	C5H9NO2	[M+H]+	3-hydroxy-1-methylpyrrolidin-2-one*	Alkaloids	Pyrrole alkaloids	132996-63-5	1	8400000	8690000	8340000	3210000	5730000	6560000	5690000	7040000	7130000	4620000	9710000	3820000	4200000	4110000	4020000	7640000	7940000	7280000	-	-
Cmyp007180	181	107	180	C11H16O2	[M+H]+	Dihydroactinidiolide	Others	Lactones	17092-92-1	1	629000	339000	212000	564000	169000	709000	634000	542000	516000	284000	264000	199000	415000	341000	310000	408000	385000	375000	-	-
Lshp011108	360	268	359	C19H21NO6	[M+H]+	8-O-acetylhomolycorine-α-N-oxide*	Alkaloids	Pyrrole alkaloids	-	1	960000	591000	1270000	26100000	14300000	17200000	1180000	1170000	9730000	114000000	8010000	136000000	708000	472000	496000	24700000	26900000	25900000	-	-
Zbln013951	377	117	377	C23H22O5	[M-H]-	1-(3'-methoxy-4'-hydroxybenzyl)-2,7-dihydroxy-4-methoxyphenanthrene	Quinones	PhenAnthraquinones	-	2	124000	70200	68600	57600	76000	56600	36500	23000	30600	19900	26400	16900	14300	13300	6420	52000	47700	49300	-	-
Zmwp002586	330	270	329	C18H19NO5	[M+H]+	1-O-Acetyllycorine	Alkaloids	Isoquinoline alkaloids	-	2	286000	858000	379000	0	0	0	8980000	39600000	33900000	8030000	9150000	10300000	9880000	6870000	7270000	7780000	8420000	7840000	C12166	-
Hajp008429	301	181	300	C17H16O5	[M+H]+	4',5-dihydroxy-7-methoxy-6-methylfavanone*	Flavonoids	Flavones	-	3	170000	2860000	16300	212000	44800	1750000	1440000	5470	8020	6940	57500	23900	447000	129000	106000	483000	458000	442000	-	-
MWSHY0149	239	137	238	C15H10O3	[M+H]+	5-Hydroxyflavone	Flavonoids	Flavones	491-78-1	3	28000	19600	19800	31900	29100	26500	28800	20700	25100	24500	18900	27700	19100	25700	33400	21800	20100	21800	-	-
pmb0501	131	114	130	C5H14N4	[M+H]+	Agmatine	Alkaloids	Alkaloids	306-60-5	3	526000	595000	523000	423000	464000	404000	955000	920000	810000	402000	627000	387000	700000	763000	882000	692000	659000	633000	C00179	ko00330,ko01100
Wchn002854	341	179	342	C16H22O8	[M-H]-	(2r,3r,4s,5s,6r)-2-{[(1r,2r,4r)-2,4-dihydroxy-1,2,3,4-tetrahydronaphthalen-1-yl]oxy}-6-(hydroxymethyl)oxane-3,4,5-triol	Others	Others	-	2	144000	136000	171000	56300	86600	114000	234000	81200	57000	296000	183000	407000	309000	383000	271000	156000	146000	159000	-	-
ML10179289	105	77	122	C8H10O	[M-H2O+H]+	2-Phenylethanol	Phenolic acids	Phenolic acids	60-12-8	3	5300000	5540000	5360000	3890000	5400000	3780000	6090000	4860000	5860000	7020000	5970000	6750000	6540000	6830000	6710000	5610000	5870000	6140000	C05853	ko00360
mws2120	291	247	292	C13H8O8	[M-H]-	Brevifolin carboxylic acid	Phenolic acids	Phenolic acids	18490-95-4	3	103000	104000	135000	97100	102000	100000	176000	99200	117000	88600	67300	116000	78400	89400	97000	101000	107000	110000	-	-
Wcjp001185	334	316	333	C17H19NO6	[M+H]+	ungminorine N-oxide	Alkaloids	Alkaloids	-	2	3880000	2800000	3460000	17900000	14000000	15700000	13400000	22000000	46900000	6430000	4620000	9340000	18700000	16500000	12100000	8490000	9260000	9080000	-	-
Lmcp000282	162	85	161	C7H15NO3	[M+H]+	L-Carnitine	Alkaloids	Alkaloids	541-15-1	3	1000000	784000	673000	1140000	505000	904000	626000	609000	629000	860000	498000	1470000	895000	1040000	838000	753000	818000	812000	C00318	-
Lmyn003028	431	269	432	C19H28O11	[M-H]-	Benzyl-β-gentiobioside*	Phenolic acids	Phenolic acids	56775-64-5	3	64500	38800	28700	111000	152000	76300	71600	78100	61300	160000	47900	77900	152000	176000	70200	41100	45000	43000	-	-
Lmzp003064	333	153	332	C16H28O7	[M+H]+	(3R,4S,6R)-p-Menth-1-ene-3,6-diol-3-O-β-D-glucoside*	Others	Alcohol compounds	-	3	2950000	2680000	3200000	1410000	1020000	1260000	179000	559000	284000	69900	240000	132000	119000	104000	101000	1130000	1060000	1030000	-	-
Labn003976	517	205	518	C24H38O12	[M-H]-	Vomifoliol 9-[Xylosyl-(1->6)-Glucoside]	Terpenoids	Monoterpenoids	-	2	23400	12300	18500	22600	15400	20600	5250	11200	10300	1870	1550	6610	9660	10900	2630	10200	10000	10900	-	-
Wccp002510	334	227	333	C18H23NO5	[M+H]+	Tazettadiol	Alkaloids	Alkaloids	-	2	18400000	10600000	17800000	735000	893000	440000	502000	202000	540000	227000	212000	185000	227000	187000	120000	3220000	3530000	3330000	-	-
Lafp007563	219	121	218	C15H22O	[M+H]+	Costal	Terpenoids	Sesquiterpenoids	-	1	177000	181000	135000	232000	146000	222000	292000	226000	270000	176000	167000	149000	116000	155000	111000	196000	188000	179000	-	-
mws1346	162	98.1	161	C6H11NO4	[M+H]+	DL-2-Aminoadipic acid	Alkaloids	Alkaloids	542-32-5	3	1630000	1550000	1400000	1850000	4530000	3500000	603000	754000	2290000	690000	1420000	557000	1450000	1560000	1820000	1810000	1970000	1830000	C00956	ko00300,ko00310,ko00311,ko01100,ko01110,ko01210,ko01230
Hamp007385	301	181	300	C17H16O5	[M+H]+	5-hydroxy-7,8-dimethoxyflavanone*	Others	Others	-	3	175000	2820000	22300	222000	46500	1700000	1500000	6730	19900	8690	56600	4060	476000	137000	100000	496000	466000	452000	-	-
Wcsp001876	302	284	301	C17H19NO4	[M+H]+	haemanthamine	Alkaloids	Alkaloids	466-75-1	3	2040000	1510000	2130000	3390000	4350000	3950000	30900000	27600000	13500000	3830000	3120000	4690000	4090000	3910000	2740000	7440000	8200000	7800000	-	-
Hahp000801	118	72.1	117	C5H11NO2	[M+H]+	alanine betaine	Alkaloids	Alkaloids	-	1	15700000	13600000	15600000	3760000	4970000	6060000	7460000	11500000	7760000	6400000	9670000	4900000	4670000	4890000	4290000	8880000	9770000	9160000	-	-
pmp001285	149	65	148	C8H4O3	[M+H]+	Phthalic anhydride	Phenolic acids	Phenolic acids	85-44-9	1	10800000	10200000	10100000	9640000	10200000	8370000	8490000	11300000	9050000	10400000	9560000	9390000	9710000	8730000	7450000	9590000	8790000	8870000	-	-
Xmbn003152	367	235	368	C17H24N2O7	[M-H]-	N-(1-deoxy-α-D fructos-1-yl)-L-tryptophan	Alkaloids	Alkaloids	-	2	78600	142000	45700	95400	81800	68800	24000	19300	5660	25700	2610	23800	9480	9020	9210	39700	43500	40400	-	-
Wbmp001584	434	255	433	C22H27NO8	[M+H]+	demethylcoclaurine-glucose*	Alkaloids	Alkaloids	-	2	56000	30800	44300	379000	302000	388000	239000	140000	189000	175000	102000	256000	205000	184000	225000	168000	183000	169000	-	-
Yajn002747	257	179	258	C11H14O7	[M-H]-	Posoquenin	Terpenoids	Monoterpenoids	75853-66-6	2	520000	421000	546000	249000	222000	232000	464000	633000	352000	339000	408000	369000	242000	210000	179000	350000	340000	318000	-	-
Ylgn009136	313	313	314	C20H26O3	[M-H]-	triptobenzene N	Terpenoids	Ditepenoids	-	2	1060000	879000	1170000	393000	210000	548000	262000	129000	144000	78500	116000	99000	97200	103000	81000	364000	395000	399000	-	-
Wcsp002545	320	151	319	C17H21NO5	[M+H]+	11β-Hydroxygalanthamine-N-oxide*	Alkaloids	Alkaloids	-	3	46400	19800	24200	92600	77400	96500	230000	24500	444000	209000	47400	316000	6100	11700	7340	106000	117000	113000	-	-
Wccp002545	320	151	319	C17H21NO5	[M+H]+	1-Epideacetylbowdensine*	Alkaloids	Alkaloids	101219-55-0	3	46400	19800	24200	92600	77400	96500	230000	24500	444000	209000	47400	316000	6100	11700	7340	106000	117000	113000	-	-
MW0139149	477	441	478	C22H22O12	[M-H]-	Nepitrin	Flavonoids	Flavones	569-90-4	3	284000	228000	361000	72800	12700	45000	228000	436000	383000	286000	149000	280000	73200	60500	16400	145000	160000	154000	-	-
Lahp003986	435	273	434	C21H22O10	[M+H]+	3,4-Dihydro-4-(4'-hydroxyphenyl)-5,7-dihydroxycoumarin glucoside*	Lignans and Coumarins	Coumarins	-	2	270000	115000	191000	436000	254000	393000	6860	20900	11000	13400	3880	22600	35900	33500	24700	121000	132000	122000	-	-
Lmjn002534	431	149	432	C19H28O11	[M-H]-	Darendoside A	Phenolic acids	Phenolic acids	149596-95-2	1	655000	304000	508000	543000	373000	504000	123000	199000	54200	123000	82000	111000	132000	117000	83900	251000	268000	243000	-	-
MWS2032	137	65	136	C7H8N2O	[M+H]+	6-Methylnicotinamide	Alkaloids	Pyridine alkaloids	6960-22-1	2	312000	496000	478000	636000	500000	692000	457000	185000	118000	396000	187000	353000	226000	347000	229000	439000	485000	461000	-	-
MWSmce118	127	81	126	C5H6N2O2	[M+H]+	Imidazole-4-Acetic Acid	Alkaloids	Alkaloids	645-65-8	3	1310000	1430000	1040000	3950000	3810000	3970000	2710000	1540000	2590000	3060000	2020000	3420000	3300000	3270000	3240000	2500000	2400000	2260000	C02835	ko00340,ko01100
Wcsn011332	279	261	280	C18H32O2	[M-H]-	Ethyl (10Z,13Z)-hexadeca-10,13-dienoate	Others	Others	-	2	165000	167000	154000	209000	295000	245000	141000	82400	141000	75500	91700	72000	55300	45400	39400	145000	132000	136000	-	-
HX1349	133	69	132	C5H8O4	[M+H]+	dihydro-4-hydroxy-5-hydroxymethyl-2(3H)-furanone	Others	Others	-	3	867000	934000	1030000	431000	516000	639000	939000	896000	759000	679000	867000	518000	444000	522000	362000	723000	776000	706000	-	-
Qmqp101736	309	179	308	C19H32O3	[M+H]+	Sessilifol O	Terpenoids	Sesquiterpenoids	-	3	27400	21600	26500	145000	106000	89000	29200	5780	42000	11700	10900	6970	10100	21200	5820	40200	37600	41500	-	-
MW0134073	477	239	478	C22H22O12	[M-H]-	Isorhamnetin 3-galactoside	Flavonoids	Flavonols	6743-92-6	3	73000	56400	59500	38900	18000	17300	90300	121000	42600	23600	21900	44800	10100	3780	4560	40500	36700	39400	-	-
Wccp011838	282	69.1	281	C18H35NO	[M+H]+	Octadec-8-enamide*	Alkaloids	Alkaloids	-	1	20600000	19800000	18800000	19800000	20000000	19500000	19000000	19100000	47700000	44700000	16800000	17700000	19000000	18600000	47900000	16600000	15000000	15800000	-	-
Zahp013600	282	69.1	281	C18H35NO	[M+H]+	Octadec-2-enamide*	Alkaloids	Alkaloids	-	1	20600000	19800000	18800000	19800000	20000000	19500000	19000000	19100000	47700000	44700000	16800000	17700000	19000000	18600000	47900000	16600000	15000000	15800000	-	-
mws1375	304	185	303	C12H21N3O6	[M+H]+	Nicotianamine	Alkaloids	Alkaloids	34441-14-0	2	4690000	6790000	5410000	6820000	9480000	8980000	7150000	6300000	12700000	8950000	11100000	6230000	9030000	9310000	12300000	9120000	9560000	8630000	C05324	ko00270,ko00999,ko01100,ko01110
WaYn005746	339	309	340	C20H20O5	[M-H]-	(E)-3-[(2S,3S)-2-(4-hydroxy-3-methoxyphenyl)-7-methoxy-3-methyl-2,3-dihydro-1-benzofuran-5-yl]prop-2-enal*	Phenolic acids	Phenolic acids	-	1	16500	104000	12100	8210	9610	222000	19500	7190	1970	2830	20800	14500	6470	42900	6820	32100	34500	35500	-	-
MW0115129	211	193	210	C11H14O4	[M+H]+	3-Methyl-1-(2,4,6-trihydroxyphenyl)-1-butanone	Others	Ketone compounds	26103-97-9	3	44400	18000	38000	1140000	2300000	14400000	12700000	70300	255000	6830000	61100	8040000	4170000	235000	39200	3420000	3140000	3130000	C07350	-
Lmsn000363	325	145	326	C16H22O7	[M-H]-	Raspberryketone glucoside	Phenolic acids	Phenolic acids	38963-94-9	1	1970000	1230000	2410000	3310000	994000	2500000	1270000	889000	818000	1130000	662000	2780000	1420000	1300000	1850000	1370000	1400000	1510000	-	-
Zmsp000366	148	130	147	C6H13NO3	[M+H]+	Fagomine	Alkaloids	Piperidine alkaloids	53185-12-9	2	62400	110000	63700	331000	303000	279000	183000	109000	140000	185000	151000	166000	253000	249000	248000	211000	232000	214000	C10144	-
Lmmn006306	293	293	294	C18H30O3	[M-H]-	Machilusolide D	Others	Lactones	-	2	50200	104000	73300	167000	470000	130000	104000	45100	326000	38600	34800	44900	46300	47100	46500	101000	95300	106000	-	-
Lmmn001643	163	119	164	C9H8O3	[M-H]-	2-Hydroxycinnamic acid*	Phenolic acids	Phenolic acids	583-17-5	1	100000	248000	157000	60400	40100	35100	97600	58400	87900	106000	78900	128000	148000	122000	153000	93800	95200	86300	C01772	ko00360,ko00999,ko01100,ko01110
Lhsp101904	235	179	234	C15H22O2	[M+H]+	polygodial	Terpenoids	Sesquiterpenoids	6754-20-7	1	3290000	3180000	2990000	3400000	3370000	3290000	3010000	3140000	3080000	3070000	2970000	3200000	3020000	2990000	2910000	3200000	2980000	2890000	C09712	-
Lhyp080702	353	261	352	C20H32O5	[M+H]+	Leopersin C(15-epi-leopersin C)	Terpenoids	Monoterpenoids	172821-84-0	2	384000	809000	1120000	37100	79300	64400	26000	31400	122000	19300	31200	15000	64900	32100	23700	203000	190000	183000	-	-
Wcjp000960	276	175	275	C16H21NO3	[M+H]+	(1R,12S,14R)-4-methyl-11-oxa-4-azatetracyclo[8.6.1.01,12.06,17]heptadeca-6(17),7,9-triene-9,14-diol*	Alkaloids	Alkaloids	-	1	3860000	2770000	3510000	200000	166000	132000	4050000	5310000	3210000	562000	1240000	629000	43100	45500	29200	2490000	2270000	2510000	-	-
pma6389	345	177	344	C18H16O7	[M+H]+	Ayanin (3',5-Dihydroxy-3,4',7-Trimethoxyflavone)	Flavonoids	Flavones	572-32-7	3	16300	14300	21700	18600	20600	18900	24100	17700	22000	17000	16900	19600	18700	19900	19800	18300	16700	18400	C04444	ko00944,ko01110
zjbp110819	311	251	310	C19H18O4	[M+H]+	6,7-dimethoxy-2-[2-phenylethyl]chromone	Others	Chromone	-	3	106000	282000	40000	24500	24000	584000	76800	42700	6020	16800	50800	7120	39700	117000	61500	112000	101000	109000	-	-
Zjxp110304	295	151	294	C18H30O3	[M+H]+	3-Hydroxy-3,7,11-trimethyldodeca-1,6E,10-trien-9-yl isobutyrate	Terpenoids	Sesquiterpenoids	-	1	30400	39000	45400	94900	130000	73800	31100	20100	107000	19000	18400	12100	22500	16100	16300	47000	51500	46800	-	-
pmp001198	132	57	131	C6H13NO2	[M+H]+	6-Deoxyfagomine	Alkaloids	Piperidine alkaloids	197449-09-5	1	25300000	25500000	29600000	11800000	14900000	17400000	23500000	25800000	20500000	18300000	23800000	14400000	12900000	13400000	10300000	21700000	23400000	21100000	-	-
Wmtn012065	253	253	254	C15H30N2O	[M-H]-	Piperazirum	Alkaloids	Alkaloids	-	2	482000	254000	424000	479000	327000	423000	309000	133000	186000	97700	109000	153000	112000	126000	102000	240000	228000	215000	-	-
Cmyp002064	463	301	462	C22H22O11	[M+H]+	Yuanhuanin*	Flavonoids	Flavones	83133-14-6	2	330000	163000	526000	163000	120000	147000	210000	220000	118000	163000	82200	153000	187000	177000	118000	265000	238000	251000	-	-
Lasp011732	335	81.1	334	C21H34O3	[M+H]+	Ent-16beta-Methoxy-19-Kauranoic Acid*	Terpenoids	Ditepenoids	-	1	1540000	737000	945000	630000	663000	564000	283000	156000	130000	95600	179000	89100	135000	222000	136000	436000	476000	431000	-	-
Lhzp110916	332	225	331	C18H21NO5	[M+H]+	Pretazettine*	Alkaloids	Pyrrole alkaloids	17322-84-8	1	5730000	5070000	6060000	2680000	1900000	2100000	146000	207000	99000	31800	301000	22500	23300	22400	14200	2080000	2090000	1890000	C08536	-
Smnp004072	449	269	448	C22H24O10	[M+H]+	8-O-methyl-7-hydroxyaloin B	Quinones	Anthraquinone	-	2	0	0	0	109000	50100	56500	43000	20600	8340	42500	20600	102000	0	0	0	45000	43000	40300	-	-
pmb0484	104	60.1	104	C5H14NO+	[M]+	Choline	Alkaloids	Alkaloids	62-49-7	3	546000	630000	601000	389000	531000	373000	470000	457000	655000	413000	347000	373000	504000	531000	479000	564000	513000	513000	C00114	ko00260,ko00564,ko01100,ko02010
WaYn003084	525	167	526	C24H30O13	[M-H]-	Guaiacylglycerol 8-O-(1''-O-Glucosyl)Vanillic Acid Ether*	Phenolic acids	Phenolic acids	-	2	1370000	1080000	1230000	50400	45300	79500	81100	101000	22600	13100	28900	22200	73500	48500	30800	241000	235000	261000	-	-
Wcop009181	295	81.1	294	C18H30O3	[M+H]+	8-(hydroxymethyl)-11b-methyltetradecahydro-6a,9-methanocyclohepta[a]naphthalene-3,8-diol	Terpenoids	Ditepenoids	-	3	117000	136000	112000	239000	166000	242000	222000	87300	126000	50700	34100	47800	51800	64100	44700	111000	106000	99000	-	-
Zaxn007230	285	285	286	C20H30O	[M-H]-	Isopimaradieneone*	Terpenoids	Ditepenoids	-	3	365000	367000	337000	367000	429000	403000	414000	430000	427000	368000	373000	370000	412000	372000	388000	324000	340000	304000	-	-
Wbkp008219	699	699	698	C38H46N6O7	[M+H]+	(3S,3'S)-N,N'-((1R,2R)-5-((3,4,5-trihydroxy-6-methyltetrahydro-2H-pyran-2-yl)oxy)cyclohex-3-ene-1,2-diyl)bis(2-methyl-2,3,4,9-tetrahydro-1H-pyrido[3,4-b]indole-3-carboxamide)	Alkaloids	Alkaloids	-	1	11100000	24000000	28400000	1250000	1890000	1540000	679000	728000	3100000	716000	1000000	450000	1900000	953000	579000	4610000	4140000	4270000	-	-
Wcjp002059	304	211	303	C17H21NO4	[M+H]+	(3S,11bS,12S)-3-methoxy-2,3,4,4a-tetrahydro-1H,6H-11b,5-ethano[1,3]dioxolo[4,5-j]phenanthridin-12-ol	Alkaloids	Alkaloids	-	1	4760000	3110000	4260000	2150000	1590000	1520000	1140000	274000	1550000	2320000	681000	944000	546000	744000	461000	3170000	3550000	3390000	-	-
Zasp102439	118	91.1	117	C8H7N	[M+H]+	m-Aminophenylacetylene	Alkaloids	Alkaloids	54060-30-9	1	30100000	28800000	30000000	9460000	12400000	12800000	17600000	20500000	22000000	15000000	23100000	14600000	10400000	10600000	9720000	17800000	18200000	19800000	-	-
Layp000971	332	152	331	C14H21NO8	[M+H]+	Hydroxymenisdaurin D	Alkaloids	Alkaloids	-	1	13100000	9250000	10900000	7990000	6220000	7970000	15100000	13800000	6350000	6160000	5860000	7560000	9390000	8410000	6460000	9670000	9550000	8680000	-	-
Hmhn007438	285	179	286	C16H14O5	[M-H]-	4'-Demethyl-3,9-dihydropunctatin	Flavonoids	Flavones	96911-00-1	2	2380	9370	19900	2870	3450	62800	10200	2610	2570	0	0	0	2480	5920	4730	7050	7870	7720	-	-
pmb0818	206	145	205	C11H11NO3	[M+H]+	Methoxyindoleacetic acid	Alkaloids	Plumerane	3471-31-6	3	24200000	21400000	24200000	4280000	6600000	6850000	11300000	15100000	15000000	9620000	17100000	8010000	5550000	5500000	5150000	12200000	13200000	13700000	C05660	ko00380
Hasp010605	353	261	352	C21H36O4	[M+H]+	(S)-2,3-dihydroxypropyl (9Z,12Z,15Z)-octadeca-9,12,15-trienoate	Others	Others	129828-41-7	1	567000	333000	444000	670000	685000	641000	220000	110000	142000	84100	259000	91700	178000	145000	59200	320000	333000	297000	-	-
Wcsn011125	361	279	362	C22H34O4	[M-H]-	Ethyl (4E,6E,8E,10E,13Z)-15,16-dihydroxy-5,9-dimethyloctadeca-4,6,8,10,13-pentaenoate	Others	Others	-	1	809000	697000	713000	899000	1230000	1100000	656000	471000	772000	317000	442000	378000	320000	237000	191000	635000	705000	640000	-	-
Zmsp000758	158	70.1	158	C8H15NO2	[M+H]+	1-(Hydroxymethyl)hexahydro-1h-pyrrolizin-2-ol	Alkaloids	Pyrrole alkaloids	-	2	32300000	36000000	34300000	18100000	29300000	18600000	58700000	57100000	46900000	25000000	35100000	25700000	38800000	46400000	40200000	35900000	40400000	38300000	-	-
Wcjp000888	152	121	151	C9H13NO	[M+H]+	N-Methyltyramine	Others	Others	370-98-9	1	5460000	5490000	5060000	16900000	21500000	21800000	5580000	3710000	8750000	4230000	6790000	4390000	4490000	4250000	4140000	7600000	8550000	8150000	C02442	ko00350,ko01100
Lhjp110307	232	186	231	C13H13NO3	[M+H]+	Plumerianine	Alkaloids	Pyridine alkaloids	-	2	1660000	1710000	1620000	1780000	2140000	1830000	921000	1080000	83200	927000	1210000	1020000	862000	979000	955000	1400000	1540000	1380000	-	-
Zmsp003052	302	270	301	C17H19NO4	[M+H]+	Amarbellisine	Alkaloids	Isoquinoline alkaloids	-	1	9610000	8710000	9360000	148000	257000	185000	1800000	4310000	687000	177000	1260000	244000	34900	23000	20000	2980000	2650000	2790000	-	-
Zmyp010736	311	161	310	C20H22O3	[M+H]+	Myricarborin	Terpenoids	Ditepenoids	-	3	113000	19000	115000	249000	49300	181000	14600	65000	25200	8360	7010	8800	142000	237000	25300	92700	85700	82500	-	-
Wbsp002166	290	272	289	C17H23NO3	[M+H]+	Lycopladine B	Alkaloids	Alkaloids	-	2	4220000	4260000	4070000	2760000	2950000	2710000	2590000	7170000	919000	1280000	1520000	1350000	1170000	1020000	1030000	3130000	2910000	2780000	-	-
MWSHC20189	357	151	358	C20H22O6	[M-H]-	Epipinoresinol*	Lignans and Coumarins	Lignans	24404-50-0	1	10000	12000	6100	7110	7270	190000	5360	2270	1800	1410	627	1410	6040	87500	7970	22700	23000	20600	-	-
Lmfn006411	269	165	270	C16H14O4	[M-H]-	Cryptostrobin (8-C-Methyl-5,7-Dihydroxyflavanone)	Flavonoids	Flavanones	-	1	3530	145000	1230	2500	830	4910	1330000	5130	2730	1890	1390	2450	2350	2120	4080	108000	96100	104000	-	-
Lshp011006	304	137	303	C17H21NO4	[M+H]+	Galanthamine N-oxide*	Alkaloids	Alkaloids	199014-26-1	1	5980000	4430000	5150000	2500000	2500000	2290000	2040000	5080000	7380000	1110000	1740000	1460000	1090000	1190000	756000	3220000	2930000	2880000	-	-
MWSmce096	219	81.1	218	C15H22O	[M+H]+	Nootkatone	Terpenoids	Sesquiterpenoids	4674-50-4	2	159000	137000	75600	166000	92100	213000	228000	195000	214000	114000	130000	106000	109000	94000	93300	140000	124000	134000	C17914	-
Wccp007140	197	151	196	C10H12O4	[M+H]+	2',6'-Dimethoxy-4'-Hydroxyacetophenone*	Others	Others	13246-14-5	1	292000	76600	188000	6300000	7870000	19200000	1310000	241000	103000	9080000	934000	11000000	2700000	456000	68800	4240000	3890000	3780000	C10684	-
Zmwp001001	290	228	289	C16H19NO4	[M+H]+	10-methylenedioxy-galanthane-1,2-diol	Alkaloids	Isoquinoline alkaloids	-	3	33000000	28000000	27700000	4960000	4650000	5190000	10300000	6030000	7620000	12300000	9820000	15100000	1380000	1450000	1280000	13700000	14600000	15500000	-	-
pmb0037	166	121	165	C10H15NO	[M+H]+	Hordenine	Alkaloids	Phenolamine	539-15-1	3	2830000	3050000	3030000	4260000	5690000	5810000	387000	1290000	2630000	360000	144000	399000	376000	377000	324000	2080000	1880000	2100000	C06199	ko00350,ko01100
Zmwp003901	314	254	313	C18H19NO4	[M+H]+	O-Acetylcrinine	Alkaloids	Isoquinoline alkaloids	93452-26-7	2	0	0	0	1310000	1220000	908000	375000	1060000	259000	465000	757000	411000	2210000	1520000	2960000	823000	922000	844000	-	-
MWStz070	182	91.1	181	C9H11NO3	[M+H]+	N-(2-Hydroxy-4-methoxyphenyl)acetamide	Alkaloids	Phenolamine	58469-06-0	1	1180000	1300000	1380000	1040000	1210000	1110000	1220000	1170000	1630000	1190000	1660000	985000	705000	681000	507000	1280000	1360000	1200000	-	-
Lmbp102601	163	89	162	C9H6O3	[M+H]+	7-Hydroxycoumarin;Umbelliferone	Lignans and Coumarins	Coumarins	93-35-6	2	404000	163000	384000	395000	316000	348000	705000	134000	678000	304000	1060000	488000	326000	382000	179000	292000	262000	290000	C09315	ko00999,ko01110
Qmdp112514	303	95.1	302	C20H30O2	[M+H]+	Isolophanthin A	Terpenoids	Ditepenoids	-	2	24800	26400	28500	23700	19300	18400	24900	16400	9520	36600	21100	29900	14600	19300	29900	20700	23300	21400	-	-
MWSHC20102	197	151	196	C10H12O4	[M+H]+	3-Hydroxy-1-(4-Hydroxy-3-Methoxyphenyl)Propan-1-One	Phenolic acids	Phenolic acids	2196-18-1	2	576000	524000	505000	330000	311000	463000	572000	723000	235000	693000	481000	898000	859000	574000	468000	428000	391000	440000	-	-
Zmsp001664	306	162	305	C17H23NO4	[M+H]+	Lycoramine N-oxide	Alkaloids	Alkaloids	-	3	2230000	1460000	1740000	385000	245000	330000	281000	109000	63500	135000	72800	206000	26100	30000	19000	475000	465000	423000	-	-
pmb3142	299	137	300	C13H16O8	[M-H]-	Salicylic acid-2-O-glucoside	Phenolic acids	Phenolic acids	10366-91-3	3	2670000	1290000	2510000	420000	387000	370000	459000	313000	328000	514000	246000	782000	646000	488000	326000	661000	727000	743000	-	-
Wcgp010223	277	93.1	276	C18H28O2	[M+H]+	3-(Cyclohexen-1-yl)-2-hydroxy-4a,5-dimethyl-2,3,4,5,6,7,8,8a-octahydronaphthalen-1-one*	Others	Others	-	3	659000	557000	896000	389000	184000	458000	354000	276000	1120000	147000	274000	142000	149000	354000	253000	478000	428000	433000	-	-
Lhjp110306	232	186	231	C13H13NO3	[M+H]+	plumericidine	Alkaloids	Pyridine alkaloids	-	2	3810000	3650000	3770000	3480000	3470000	3130000	4510000	3260000	4470000	3620000	2100000	4840000	2680000	2570000	2600000	3400000	3650000	3230000	-	-
pmf0348	187	97.1	188	C10H20O3	[M-H]-	2,6-Dimethyl-7-octene-2,3,6-triol	Others	Alcohol compounds	73815-21-1	3	142000	253000	315000	216000	127000	120000	221000	166000	304000	195000	125000	353000	265000	283000	229000	230000	207000	206000	-	-
Wasn001446	353	173	354	C14H26O10	[M-H]-	Glucosyl 6-methylhept-6-ene-1,2,3,4,5-pentaol	Others	Others	-	3	86500	52000	48900	49000	44000	48300	56000	12600	34200	37100	24200	44800	36100	27600	31200	36700	38700	41500	-	-
mws0906	341	179	342	C16H22O8	[M-H]-	Coniferin	Phenolic acids	Phenolic acids	531-29-3	2	220000	229000	284000	198000	156000	227000	403000	155000	99500	410000	267000	521000	482000	589000	306000	244000	273000	271000	C00761	ko00940,ko01110
pme2693	131	114	130	C6H14N2O	[M+H]+	N-Acetylputrescine	Alkaloids	Alkaloids	18233-70-0	3	338000	384000	438000	288000	321000	293000	696000	640000	596000	241000	372000	251000	612000	633000	619000	394000	434000	386000	C02714	ko00330,ko01100
Lmjn010508	277	205	278	C17H26O3	[M-H]-	Fusarester B	Others	Ketone compounds	-	1	601000	649000	608000	626000	648000	638000	580000	582000	573000	587000	592000	578000	570000	594000	611000	650000	606000	574000	-	-
Hmsn002598	301	139	302	C13H18O8	[M-H]-	Salirepin	Phenolic acids	Phenolic acids	26652-12-0	2	27500	17700	28600	16000	22100	67400	4390	25400	24500	18800	29400	3270	17500	38600	29600	21500	22700	20100	-	-
pmn001727	474	312	475	C24H29NO9	[M-H]-	N-(4-O-(Glucosyl)-E-feruloyl)-tyramine	Alkaloids	Phenolamine	-	2	96600	89000	38100	318000	84200	717000	72700	65300	16900	102000	10900	36100	49700	29900	16000	111000	114000	125000	-	-
Wcdp003967	218	88.1	217	C12H27NO2	[M+H]+	Deacetylclavaminol H	Others	Others	-	2	131000	140000	144000	112000	130000	140000	196000	149000	127000	97400	112000	149000	133000	124000	147000	500000	463000	442000	-	-
MWS1961	205	189	206	C13H22N2	[M-H]-	N,N'-Dicyclohexylcarbodiimide	Alkaloids	Alkaloids	538-75-0	2	987000	1200000	1080000	1240000	1390000	1120000	1180000	1190000	1130000	1100000	1210000	1050000	1300000	1210000	1070000	1140000	1260000	1120000	-	-
Zaxn006641	299	299	300	C20H28O2	[M-H]-	Dehydroabietic acid	Terpenoids	Ditepenoids	1740-19-8	2	119000	92900	109000	122000	116000	113000	89800	59300	60600	111000	93100	120000	71600	112000	111000	91300	90700	81400	C12078	-
Wcjp001791	274	256	273	C16H19NO3	[M+H]+	8-Demethylmaritidine	Alkaloids	Alkaloids	-	2	9990000	8120000	8410000	13900000	16500000	15100000	13200000	6600000	3470000	5470000	5730000	4490000	4490000	8840000	5490000	7740000	8060000	8750000	C12180	ko00950
Zahp012577	280	81.1	279	C18H33NO	[M+H]+	Octadecadienamide	Alkaloids	Alkaloids	-	2	8500000	8100000	7480000	8770000	9010000	7990000	8020000	7920000	7690000	7360000	7310000	7550000	8200000	6420000	6850000	5640000	5320000	4960000	-	-
Wafn005994	447	315	448	C21H36O10	[M-H]-	Geranyl 6-O-xylopyranosyl-glucopyranoside*	Others	Others	124044-06-0	2	151000	111000	107000	84600	25300	91000	6780	10600	96400	10900	17200	15400	1200	1160	3120	49400	51100	45000	-	-
HX1341	163	89	162	C9H6O3	[M+H]+	7-hydroxy-2H-1-benzopyran-2-one*	Lignans and Coumarins	Coumarins	-	2	2300000	1820000	2150000	1380000	1570000	1320000	1960000	1620000	1510000	2760000	2110000	2510000	1680000	1540000	1160000	1820000	1860000	1650000	-	-
mws0704	140	79	141	C2H8NO4P	[M-H]-	O-Phosphorylethanolamine	Alkaloids	Alkaloids	1071-23-4	3	859000	928000	1020000	577000	946000	1310000	388000	500000	586000	725000	745000	582000	473000	468000	447000	890000	781000	834000	C00346	ko00563,ko00564,ko00600,ko01100
Sazp000955	272	110	271	C12H17NO6	[M+H]+	Tetraphyllin A*	Alkaloids	Isoquinoline alkaloids	-	2	2480000	1210000	1500000	206000	163000	153000	456000	1040000	190000	117000	201000	119000	126000	96900	77600	585000	666000	638000	-	-
Lhhp102923	327	137	326	C20H22O4	[M+H]+	(7'R,8'R)-7'8'-dihydro-7'-(5'-hydroxy-3'-methoxphenyl)-3-methoxy-8'-methyl-1-(E)-propenylbenzof-uran	Lignans and Coumarins	Lignans	-	2	371000	250000	252000	63600	12600	32400	49200	64700	22200	10600	40000	14800	65000	46500	37000	76900	86900	85600	-	-
Lshp011009	276	175	275	C16H21NO3	[M+H]+	N-Demethyllycoramine*	Alkaloids	Alkaloids	-	1	3630000	2880000	3800000	177000	144000	123000	3920000	5150000	3080000	518000	1120000	631000	49300	41900	24700	2410000	2240000	2560000	-	-
Lmwp102904	219	174	218	C13H18N2O	[M+H]+	N,N-Dimethyl-5-methoxytryptamine	Alkaloids	Plumerane	1019-45-0	3	38000	68200	46500	118000	62300	106000	84800	41700	86700	34300	32700	49200	223000	122000	58200	68500	67900	76300	C08309	-
MWSmce204	336	320	336	C20H18NO4+	[M]+	Epiberberine	Alkaloids	Isoquinoline alkaloids	6873-09-02	2	66200	95600	76900	45800	31200	113000	21100	30200	63200	30300	49300	16200	7760	165000	27300	59600	52600	58400	-	-
Lamp007647	257	137	256	C15H12O4	[M+H]+	2',4,4'-Trihydroxychalcone*	Flavonoids	Chalcones	-	1	4030	11500	2030	3450	33300	987000	110000	8330	7200	2690	2270	3540	12200	39700	21300	94100	83500	84900	-	-
MWSHY0037	257	137	256	C15H12O4	[M+H]+	Isoliquiritigenin*	Flavonoids	Chalcones	961-29-5	1	4030	11500	2030	3450	33300	987000	110000	8330	7200	2690	2270	3540	12200	39700	21300	94100	83500	84900	C08650	ko00941,ko01100,ko01110
Zahp003781	223	149	222	C12H14O4	[M+H]+	4-hydroxy-3-(2-hydroxy-3-methylbut-3-en-1-yl)benzoic acid	Phenolic acids	Phenolic acids	-	2	201000	156000	246000	240000	228000	112000	93100	145000	213000	139000	163000	241000	192000	161000	99900	154000	176000	167000	-	-
Zahn002102	237	149	238	C11H10O6	[M-H]-	(3r,4r)-4,6-dihydroxy-3-methyl-1-oxo-3,4-dihydro-2-benzopyran-5-carboxylic acid-2	Phenolic acids	Phenolic acids	-	2	719000	615000	765000	296000	225000	259000	553000	705000	594000	690000	444000	663000	368000	330000	229000	562000	500000	504000	-	-
Lshp011013	318	149	317	C17H19NO5	[M+H]+	Haemanthidine	Alkaloids	Pyridine alkaloids	11002-52-1	3	1200000	1150000	1410000	7690000	5790000	5880000	14800000	8610000	26400000	7300000	4820000	8930000	67500	56500	42500	5760000	6210000	6580000	C12174	-
Ymsp002543	272	272	271	C16H17NO3	[M+H]+	Nornarwedine	Alkaloids	Alkaloids	-	2	832000	1300000	1040000	2650000	3580000	2850000	1200000	1370000	1280000	578000	1390000	789000	1510000	1880000	2730000	1530000	1460000	1660000	-	-
Yajn003045	443	59	444	C21H32O10	[M-H]-	Ebuloside	Terpenoids	Monoterpenoids	-	3	5700	4930	9300	5300	3370	5260	6920	8550	6320	5440	5820	5670	3290	2850	510	6250	6090	6900	-	-
Wcgn012724	281	199	282	C16H26O4	[M-H]-	6-Hydroxyphomodiol	Others	Others	-	1	581000	564000	586000	538000	516000	591000	532000	517000	589000	458000	530000	524000	490000	461000	434000	533000	488000	468000	-	-
Wbmp011352	701	701	700	C37H52N2O11	[M+H]+	Puberaconitidine	Alkaloids	Alkaloids	83685-21-6	2	17900000	63800000	58900000	3390000	7890000	10900000	2400000	2680000	6490000	3840000	4050000	1870000	9060000	3270000	2150000	14300000	12600000	14100000	-	-
Yajp008857	161	105	160	C10H8O2	[M+H]+	Viburtinal	Terpenoids	Monoterpenoids	63661-79-0	2	251000	372000	335000	243000	435000	340000	278000	310000	375000	316000	320000	382000	322000	294000	329000	345000	381000	336000	-	-
pme3083	164	120	165	C8H7NO3	[M-H]-	2-(Formylamino)benzoic acid	Phenolic acids	Phenolic acids	3342-77-6	3	71300	123000	79800	42500	68000	52500	60300	60700	99200	85200	82300	58800	57900	70500	67900	110000	99600	96400	C05653	ko00380,ko01100
Wcsn010254	277	277	278	C18H30O2	[M-H]-	4-[3-(4,8-dimethylnona-3,7-dienyl)-3-methyloxiran-2-yl]butan-2-one	Others	Others	-	1	4140000	3450000	3680000	3060000	3400000	2480000	1530000	885000	1400000	682000	1270000	762000	691000	489000	318000	2150000	1980000	1880000	-	-
Wasn003942	363	201	364	C16H28O9	[M-H]-	Glucosyl 6,9-dihydroxydec-4-enoic acid	Others	Others	-	2	164000	66400	92900	37000	32800	43700	121000	99600	63100	83700	22300	140000	81500	83300	36200	66200	71400	75900	-	-
Lmtn002565	329	167	330	C14H18O9	[M-H]-	1-O-Vanilloyl-D-Glucose	Phenolic acids	Phenolic acids	-	1	7210	8490	7970	227000	323000	1750000	17900	30900	6070	48900	83400	44000	24300	13700	10500	188000	199000	215000	C20470	-
Lskp211385	357	307	356	C20H20O6	[M+H]+	(-)-dihydrosesamin*	Lignans and Coumarins	Lignans	-	3	40100	193000	6040	8630	11100	313000	12100	9160	6270	3060	5420	3020	7160	19600	5370	45700	40200	41100	-	-
Ladp002935	190	144	189	C10H7NO3	[M+H]+	3-quinolinecarboxylic acid	Alkaloids	Quinoline alkaloids	-	2	4650000	4360000	5400000	990000	1430000	1630000	2480000	3390000	3290000	1930000	3560000	1970000	1150000	1060000	1110000	2500000	2660000	2870000	-	-
MWSmce709	130	103	129	C9H7N	[M+H]+	Isoquinoline	Alkaloids	Isoquinoline alkaloids	119-65-3	2	10600000	11100000	11800000	3260000	4580000	5110000	6670000	7980000	8500000	6490000	9580000	5790000	4370000	4070000	4350000	7480000	8460000	8480000	C06323	-
Lmgn001670	137	108	138	C7H6O3	[M-H]-	Salicylic acid	Phenolic acids	Phenolic acids	69-72-7	1	296000	281000	302000	180000	191000	207000	243000	271000	215000	265000	273000	245000	305000	337000	378000	229000	264000	246000	C00805	ko00996,ko01100,ko01110,ko04075
Wmln000659	193	101	194	C10H10O4	[M-H]-	3-Methyl-4,8-dihydroxy-3,4-dihydroisocoumarin	Lignans and Coumarins	Coumarins	33788-22-6	3	10900	10300	10300	9540	9330	6010	12400	8690	14700	9800	9630	14900	4820	6300	4040	9150	9980	10500	-	-
MA10002917	183	109	184	C6H4N2O5	[M-H]-	2,4-Dinitrophenol	Phenolic acids	Phenolic acids	51-28-5	2	105000	239000	245000	274000	247000	267000	114000	249000	257000	248000	270000	240000	265000	267000	117000	213000	241000	215000	C02496	-
MWSHY0124	257	153	256	C15H12O4	[M+H]+	Pinocembrin (Dihydrochrysin)	Flavonoids	Flavanones	480-39-7	1	34700	557000	7430	7880	4410	46200	6480000	24200	40800	8710	5500	7220	19200	41400	15400	483000	445000	420000	C09827	ko00941
Lasp002993	487	325	486	C26H30O9	[M+H]+	Isobavachalcone glucoside	Flavonoids	Chalcones	-	2	121000	77200	107000	10500	16700	14300	40600	265000	197000	23000	15700	38200	61700	79000	22900	47900	48000	42300	-	-
MWSslk097	195	163	194	C10H10O4	[M+H]+	Dimethyl phthalate	Phenolic acids	Phenolic acids	131-11-3	1	5910000	6180000	6160000	6170000	6140000	5850000	6060000	5760000	5670000	5320000	5360000	5520000	5410000	5100000	5020000	6390000	6140000	5550000	C11233	-
HX1339	147	130	146	C8H6N2O	[M+H]+	4-puinazolinone	Alkaloids	Alkaloids	-	2	310000	340000	174000	80500	125000	206000	274000	152000	479000	166000	255000	244000	219000	237000	207000	287000	271000	312000	-	-
MWS1875	143	115	144	C10H8O	[M-H]-	2-Naphthol*	Phenolic acids	Phenolic acids	135-19-3	3	42300	44900	42700	42600	44100	43700	39300	48300	51800	44500	49000	51000	44300	44500	43000	39400	43900	45300	C11713	-
Wbjp002868	229	214	228	C13H12N2O2	[M+H]+	3-Methoxy-1-methyl-2,9-dihydropyrido[3,4-b]indol-7-one	Alkaloids	Alkaloids	-	2	1520000	3560000	2020000	5460000	7060000	5630000	2600000	601000	290000	1930000	2480000	1870000	4810000	5230000	5910000	3010000	3220000	2790000	-	-
Wcqn002538	341	135	342	C16H22O8	[M-H]-	(2R,3R,4S,5S,6R)-2-[[(1R,2R,4R)-2,4-dihydroxy-1,2,3,4-tetrahydronaphthalen-1-yl]oxy]-6-(hydroxymethyl)oxane-3,4,5-triol	Others	Others	-	2	94200	53600	85000	172000	128000	130000	204000	32300	43200	41600	98400	72000	83100	80000	35100	77100	86100	88600	-	-
Hmtn001288	181	135	182	C9H10O4	[M-H]-	Methyl 2,4-dihydroxyphenylacetate*	Phenolic acids	Phenolic acids	67828-42-6	2	529000	469000	531000	321000	264000	292000	501000	634000	410000	437000	467000	424000	308000	276000	232000	360000	413000	404000	-	-
Zmwp003264	318	227	317	C17H19NO5	[M+H]+	6-Hydroxypowelline*	Alkaloids	Isoquinoline alkaloids	-	2	2650000	2580000	3320000	1320000	633000	1170000	8170000	14700000	4620000	51100	3410000	52500	40300	22500	25200	3800000	3610000	3290000	-	-
Wbmn009893	393	333	394	C22H34O6	[M-H]-	3-Acetoxy-9,13-epoxy-16-hydroxy-labda-15,16-olide	Terpenoids	Ditepenoids	-	2	94100	95300	141000	98600	86600	119000	72400	38100	43600	17700	20700	25300	26400	16000	20900	62000	60800	54100	-	-
MWStz322	340	340	339	C20H21NO4	[M+H]+	(S)-Canadine	Alkaloids	Isoquinoline alkaloids	5096-57-1	2	2480000	1030000	3420000	139000	160000	76100	82500	99100	94800	21900	67700	13000	0	0	0	707000	619000	700000	C03329	ko00950,ko01100,ko01110
Lhzp110915	318	227	317	C17H19NO5	[M+H]+	3-O-Demethyltazettine*	Alkaloids	Pyrrole alkaloids	-	1	3340000	3270000	4030000	1520000	1900000	1390000	10200000	17000000	5710000	61100	7790000	41400	53600	22800	26400	4870000	4440000	4220000	-	-
Lmbn014696	301	301	302	C20H30O2	[M-H]-	Pimaric acid*	Terpenoids	Ditepenoids	127-27-5	1	294000	227000	254000	259000	230000	300000	237000	283000	263000	238000	236000	294000	274000	245000	280000	281000	252000	246000	C09159	-
Yaap009385	415	119	414	C24H30O6	[M+H]+	Myrtucommulone B	Others	Others	54247-23-3	1	2030000	1720000	1780000	2050000	2200000	2300000	2360000	1930000	2080000	1980000	1620000	1490000	1560000	1770000	1700000	1610000	1440000	1400000	-	-
Lmyn000503	343	85	344	C13H12O11	[M-H]-	Mucic acid-1,4-lactone-2-O-gallate	Phenolic acids	Phenolic acids	-	3	89000	71400	92600	147000	84100	146000	86500	66900	82800	68800	52500	65300	145000	155000	131000	89000	77300	86600	-	-
MWSHY0062	271	167	270	C16H14O4	[M+H]+	2',4'-Dihydroxy-4-methoxychalcone; (E)-Cardamonin	Flavonoids	Chalcones	19309-14-9	1	19500	1130000	3770	814	2490	24600	11200000	18500	20400	9790	2740	3780	18300	9160	5510	905000	869000	783000	-	-
Lmbn001981	137	93	138	C7H6O3	[M-H]-	2,5-Dihydroxybenzaldehyde*	Others	Aldehyde compounds	1194-98-5	1	410000	513000	517000	358000	361000	375000	207000	223000	473000	579000	507000	485000	846000	835000	972000	445000	481000	416000	C05585	ko00350,ko01100
Zbzp007397	181	135	180	C11H16O2	[M+H]+	5,6,7,7a-tetrahydro-4,4,7a-trimethyl-2(4H)-benzofuranone*	Others	Others	15356-74-8	3	524000	269000	146000	418000	160000	573000	495000	438000	368000	211000	212000	159000	314000	249000	239000	348000	324000	300000	-	-
MWS5206	181	135	182	C9H10O4	[M-H]-	4-Hydroxyphenyllactic Acid*	Phenolic acids	Phenolic acids	306-23-0	2	524000	426000	511000	271000	264000	310000	485000	584000	383000	421000	468000	424000	275000	268000	199000	329000	379000	344000	C03672	-
Wccp003073	318	227	317	C17H19NO5	[M+H]+	Ungiminorine*	Alkaloids	Alkaloids	-	1	2990000	2680000	3280000	1310000	1640000	1080000	7630000	14000000	1990000	66700	6760000	52400	58300	32000	26900	3750000	3730000	3280000	-	-
Wcdp004275	230	57.1	229	C14H31NO	[M+H]+	Lauramine oxide	Others	Others	1643-20-5	1	130000	131000	130000	130000	113000	140000	121000	126000	127000	112000	114000	134000	102000	111000	112000	171000	155000	149000	-	-
Zbbn005905	339	309	340	C20H20O5	[M-H]-	(2S)-Abyssinone II*	Flavonoids	Flavanones	-	1	21400	104000	12500	7600	6190	238000	17700	5450	1700	2000	19600	840	8270	46300	6280	34900	32000	37100	-	-
mws2218	195	83.1	194	C8H10N4O2	[M+H]+	Caffeine	Alkaloids	Alkaloids	58-08-2	1	56900	14800	70400	177000	45700	137000	52200	47000	179000	71700	75000	32900	63400	50600	36400	73000	63400	65800	C07481	ko00232,ko01100,ko01110
MWSmce587	183	165	182	C9H10O4	[M+H]+	2,6-Dimethoxybenzoic acid	Phenolic acids	Phenolic acids	1466-76-8	2	121000	27700	39000	312000	430000	683000	529000	42100	23300	993000	427000	677000	63800	20600	5760	310000	269000	281000	-	-
Wbwn006953	337	307	338	C20H18O5	[M-H]-	Cagayanone A	Lignans and Coumarins	Lignans	-	2	20400	99500	2540	4540	4240	171000	6150	4250	2350	1350	2660	9560	3910	11600	2110	20300	22100	23500	-	-
Wbjp002330	221	175	220	C11H12N2O3	[M+H]+	(3S)-1,3-dihydroxy-2,3,3a,4-tetrahydropyrrolo[2,1-b]quinazolin-9(1H)-one	Alkaloids	Alkaloids	-	2	6060000	7270000	6130000	2760000	1980000	3780000	5410000	3190000	8950000	5910000	7530000	4960000	4420000	4380000	4040000	5660000	6380000	6520000	-	-
Haxp007330	179	135	178	C10H10O3	[M+H]+	p-Methoxycinnamic acida	Others	Others	-	2	149000	102000	87800	143000	95000	161000	151000	138000	143000	81300	82500	78800	115000	116000	87800	117000	106000	101000	-	-
Wcsp002246	344	147	343	C22H17NO3	[M+H]+	N-Phenylethylcrinasiadine	Alkaloids	Alkaloids	-	1	169000	177000	322000	28100	31900	46700	97400	82800	77400	185000	199000	223000	95300	95200	139000	101000	101000	114000	-	-
Lmhp003013	279	177	278	C15H22N2O3	[M+H]+	N-Feruloyl-Cadaverine	Alkaloids	Phenolamine	-	3	51700	48400	63200	25800	33300	16000	30900	41900	58000	57400	24000	62700	23600	30700	13300	40900	35400	36500	-	-
mws0620	175	144	174	C11H14N2	[M+H]+	N-Methyltryptamine	Alkaloids	Plumerane	61-49-4	3	1700000	944000	1450000	237000	275000	264000	229000	289000	259000	151000	71900	239000	255000	211000	150000	525000	484000	564000	C06213	ko00380,ko01100
Cmmn013275	301	301	302	C20H30O2	[M-H]-	Isopimaric acid*	Terpenoids	Ditepenoids	5835-26-7	1	87900	87100	83200	82000	85300	95100	72800	90000	68700	79800	68700	78400	78400	65500	88800	73200	77100	85100	-	-
pmb1754	184	125	184	C5H15NO4P+	[M]+	O-Phosphocholine	Alkaloids	Alkaloids	107-73-3	3	55100000	83900000	86200000	28700000	56800000	72500000	26800000	20900000	15300000	46000000	36000000	30800000	23400000	29900000	29700000	54700000	47600000	48400000	C00588	ko00564,ko01100
Wccp003031	316	211	315	C18H21NO4	[M+H]+	1-O-Acetylnorpluviine	Alkaloids	Alkaloids	-	1	58900000	41400000	52600000	2160000	1600000	2060000	1430000	1270000	204000	188000	1150000	229000	41200	19300	20300	15300000	15500000	13400000	-	-
HJN003	385	223	386	C17H22O10	[M-H]-	1-O-Sinapoyl-β-D-glucose	Phenolic acids	Phenolic acids	-	2	132000	59600	129000	39100	31400	48000	149000	180000	314000	131000	239000	247000	223000	208000	130000	122000	132000	142000	C01175	ko00940,ko01110
HJKP000649	136	91.1	135	C8H9NO	[M+H]+	N-benzylformamide*	Alkaloids	Alkaloids	6343-54-0	1	1440000	1490000	1800000	1230000	1520000	1650000	1220000	1380000	1890000	1420000	1980000	1230000	733000	792000	757000	1760000	1760000	1540000	C15561	-
Ljmp121505	247	187	246	C15H18O3	[M+H]+	Mansonone S	Others	Ketone compounds	-	1	98900	98700	83900	49400	69900	55800	70000	96900	50800	80100	74000	73600	53000	60800	58500	66100	64100	56900	-	-
pmb0503	439	147	438	C20H30N4O7	[M+H]+	N-(4'-O-glycosyl)-p-coumaroyl agmatine	Alkaloids	Phenolamine	-	3	120000	116000	100000	62800	68800	88300	71600	104000	105000	101000	91600	126000	104000	79400	122000	136000	117000	125000	-	-
Cmsp002664	302	270	301	C18H23NO3	[M+H]+	Cephalezomine M	Alkaloids	Isoquinoline alkaloids	462075-60-1	2	178000	270000	240000	26000000	25600000	24700000	22500000	3780000	10600000	44600000	5110000	55600000	159000	125000	70100	15200000	15100000	13200000	-	-
Lmmp007480	257	137	256	C15H12O4	[M+H]+	2,4,4'-trihydroxychalcone*	Flavonoids	Chalcones	-	1	4910	8080	1560	6240	35700	998000	103000	7100	5920	5750	1560	3200	9210	36100	21200	91900	86500	78600	-	-
Saln000499	683	341	684	C31H40O17	[M-H]-	7-O-(4''-O-glucosyl)coumaroyl-loganic acid	Terpenoids	Monoterpenoids	-	3	16700000	20900000	22500000	28200000	19700000	28100000	14500000	15600000	8120000	7640000	8660000	16100000	27700000	40600000	23500000	13000000	13800000	15200000	-	-
pmp000724	166	121	165	C10H15NO	[M+H]+	Pseudoephedrine	Alkaloids	Alkaloids	90-82-4	3	2780000	3070000	2890000	4460000	5990000	5460000	391000	1250000	2620000	239000	125000	429000	360000	383000	358000	2010000	1810000	2110000	C02765	ko00996,ko01100
pmc1990	299	119	300	C17H16O5	[M-H]-	4'-Hydroxy-5,7-dimethoxyflavanone	Flavonoids	Flavanones	-	3	39500	646000	4980	51000	12500	465000	368000	3640	3310	1890	15400	6310	133000	45400	29100	113000	127000	131000	-	-
Wbmp008021	478	337	477	C26H39NO7	[M+H]+	(14-Ethyl-4,6,19-trimethoxy-9,11-dioxa-14-azaheptacyclo[10.7.2.12,5.01,13.03,8.08,12.016,20]docosan-21-yl)acetate	Alkaloids	Alkaloids	-	2	30500000	19000000	17800000	3740000	3560000	8950000	2770000	5150000	1850000	2720000	2770000	3780000	5170000	2620000	2160000	7740000	6620000	7090000	-	-
Yaln008277	393	311	394	C22H34O6	[M-H]-	Trijugin A	Terpenoids	Sesquiterpenoids	-	3	111000	165000	155000	81400	223000	67000	199000	114000	279000	58300	56800	85600	44800	53000	37100	101000	116000	102000	-	-
Wcop008480	181	135	180	C11H16O2	[M+H]+	2,5-dimethyl-2,3,3a,7a-tetrahydro-1H-indene-1,3-diol*	Terpenoids	Sesquiterpenoids	-	3	562000	288000	173000	430000	156000	563000	499000	486000	413000	211000	237000	156000	320000	260000	256000	337000	317000	288000	-	-
Wbmn011269	377	295	378	C22H34O5	[M-H]-	Vitexilactone*	Terpenoids	Ditepenoids	61263-49-8	1	1120000	1220000	1480000	1430000	2270000	1230000	868000	376000	1620000	337000	375000	427000	331000	411000	242000	829000	945000	825000	-	-
Zmsp001272	274	256	273	C16H19NO3	[M+H]+	Norgalanthamine	Alkaloids	Alkaloids	-	1	4510000	3890000	4220000	2720000	2520000	2490000	2710000	2680000	5370000	1990000	2910000	4100000	5350000	4510000	3690000	4410000	3760000	4130000	-	-
MWSmce412	193	91.1	192	C12H16O2	[M+H]+	Senkyunolide A	Others	Lactones	63038-10-8	3	120000	114000	75700	144000	87500	146000	154000	142000	131000	92800	125000	75500	78700	96600	88400	124000	109000	108000	C17853	-
MWS1777	128	93.1	127	C6H6ClN	[M+H]+	3-Chloroaniline	Alkaloids	Alkaloids	108-42-9	1	17700000	17100000	16100000	17600000	17200000	16900000	15900000	15500000	16100000	15300000	16200000	15600000	15800000	15900000	15400000	16900000	15400000	14400000	-	-
Zahp006511	280	67.1	279	C18H33NO	[M+H]+	N-((9E,11E)-13-methylpentadeca-9,11-dien-1-yl)acetamide	Alkaloids	Alkaloids	-	2	1700000	1780000	1830000	1800000	1840000	1710000	1730000	2030000	1870000	1710000	1570000	1690000	2070000	1370000	1880000	1120000	1120000	974000	-	-
Lmhn010314	233	217	234	C15H22O2	[M-H]-	Aspergillusene A	Terpenoids	Sesquiterpenoids	-	3	63900	57300	61900	61500	55400	60000	57700	58600	61400	58000	55500	58000	59000	56100	56200	66200	59100	56900	-	-
Yalp003420	163	103	162	C10H10O2	[M+H]+	2-(furan-2-ylmethyl)-5-methylfuran	Others	Others	13678-51-8	1	713000	609000	719000	94900	108000	357000	241000	115000	79100	55200	155000	58600	305000	238000	92200	180000	207000	181000	-	-
MWSmce349	282	114	281	C18H35NO	[M+H]+	Laurocapram	Alkaloids	Alkaloids	59227-89-3	2	15800000	15100000	14500000	14100000	14500000	14200000	14200000	15500000	14200000	13800000	12700000	13000000	14400000	14300000	14200000	13100000	11400000	11400000	-	-
pmp000452	225	85.1	224	C13H20O3	[M+H]+	Annuionone D	Others	Ketone compounds	-	2	197000	140000	205000	173000	105000	125000	161000	194000	161000	133000	144000	162000	113000	110000	83000	128000	137000	150000	-	-
Wbmn010746	377	295	378	C22H34O5	[M-H]-	Negundoin A*	Terpenoids	Ditepenoids	-	1	1010000	1110000	1460000	1390000	2220000	1130000	818000	360000	1490000	352000	339000	409000	294000	400000	217000	744000	874000	793000	-	-
Zmdn006929	255	213	256	C15H12O4	[M-H]-	Aloe-Emodin-9-Anthrone	Quinones	Anthraquinone	6247-99-0	2	4580	65300	1980	946	585	6900	777000	2930	4610	0	0	0	2670	5630	1900	67100	57200	64500	C16760	-
Lmgp000659	136	91.1	135	C8H9NO	[M+H]+	2-Phenylacetamide*	Alkaloids	Alkaloids	103-81-1	1	1620000	1910000	1700000	1290000	1530000	1720000	1300000	1470000	2060000	1560000	2000000	1310000	766000	881000	778000	1750000	1770000	1520000	C02505	ko00360,ko01100
Wcdp005264	246	88.1	245	C14H31NO2	[M+H]+	Tetradecasphinganine	Others	Others	-	2	167000	171000	182000	173000	184000	172000	237000	189000	163000	152000	160000	196000	139000	158000	176000	515000	454000	443000	-	-
Lmtp004688	706	706	705	C39H63O10N	[M+H]+	β-Chaconine	Alkaloids	Steroid alkaloids	472-51-5	2	2220000	2170000	2200000	480000	1690000	749000	3210000	1950000	1840000	1840000	1720000	1560000	5340000	3380000	3040000	2240000	2200000	1920000	-	-
Lshp011109	332	272	331	C18H21NO5	[M+H]+	2a-hydroxy-6-O-methoxyloduline[(5a,7a)-7-methoxy-1-methyl-9,10-[methylenebis(oxy)]-1ycorenan-5-ol]*	Alkaloids	Pyrrole alkaloids	-	1	1270000	1110000	1430000	1240000	1230000	1050000	2250000	12600000	8750000	1830000	2260000	2100000	2430000	2040000	1550000	2800000	3060000	2600000	-	-
Zmdn011161	239	223	240	C15H12O3	[M-H]-	Chrysophanol-9-anthrone	Quinones	Anthraquinone	491-58-7	2	350000	373000	239000	213000	257000	305000	327000	360000	386000	255000	284000	261000	299000	297000	285000	293000	249000	282000	C10314	-
Zmgp004297	281	107	280	C19H20O2	[M+H]+	1-phenyl-7-(4-hydroxyphenyl)-4-ene-3-heptanone	Others	Ketone compounds	-	2	571000	457000	475000	565000	604000	594000	647000	538000	565000	505000	410000	396000	416000	422000	468000	438000	402000	371000	-	-
Wbmp010456	277	93.1	276	C18H28O2	[M+H]+	Macrophypene B*	Terpenoids	Ditepenoids	-	3	631000	555000	786000	617000	485000	450000	325000	261000	1120000	126000	267000	134000	125000	330000	228000	473000	447000	400000	-	-
mws1383	243	145	242	C12H10N4O2	[M+H]+	Lumichrome	Alkaloids	Alkaloids	1086-80-2	3	52500	99900	99400	30200	109000	33500	41100	50100	67500	53100	89900	87700	115000	47500	41000	62700	58800	69400	C01727	ko00740
Wcdp000970	121	103	120	C8H8O	[M+H]+	acetophenone	Others	Others	98-86-2	2	1590000	2010000	2100000	1500000	1800000	1840000	1150000	363000	288000	1560000	808000	1150000	2700000	2030000	2750000	1570000	1690000	1420000	C07113	-
pme1261	206	76.1	205	C9H19NO4	[M+H]+	D-Panthenol	Others	Alcohol compounds	81-13-0	3	85000	56100	73500	159000	88100	148000	99800	57800	687000	37600	112000	39600	57800	121000	536000	41500	49000	46900	C05944	ko00770
pmb0629	463	313	462	C22H22O11	[M+H]+	Chrysoeriol-6-C-glucoside (Isoscoparin)	Flavonoids	Flavones	20013-23-4	3	20100	36100	21500	27100	47100	66700	77100	25800	39800	71600	39500	111000	59900	47800	152000	38400	45500	42100	C05990	-
Wchn003509	359	239	360	C15H20O10	[M-H]-	Syringoyl-D-Glucose	Phenolic acids	Phenolic acids	-	2	372000	336000	497000	379000	300000	340000	470000	626000	1000000	1370000	870000	1110000	890000	809000	524000	590000	699000	650000	-	-
Wafn002874	515	323	516	C22H28O14	[M-H]-	4-O-(4'-O-alpha-D-Glucopyranosyl)caffeoylquinic acid	Phenolic acids	Phenolic acids	1401352-62-2	3	31900	10600	22600	4760	5320	6710	14500	12400	14700	7970	4470	6710	12700	17300	8560	9170	10600	10700	-	-
Wcdn006883	357	151	358	C20H22O6	[M-H]-	epipinoresinol*	Lignans and Coumarins	Lignans	18779-41-4	1	8780	13500	4730	10900	7120	213000	5370	5080	947	4030	2560	1070	6420	102000	6300	20400	21600	24000	-	-
Hmbp001276	169	65	168	C8H8O4	[M+H]+	Gallacetophenone	Phenolic acids	Phenolic acids	528-21-2	2	1460000	931000	1080000	945000	841000	1250000	550000	702000	467000	1110000	271000	1250000	6440000	5990000	3190000	1330000	1140000	1160000	-	-
Wbsp000191	226	180	225	C12H23N3O	[M+H]+	3,7,11-trimethyl-2-oxa-6,10,13-triazatricyclo[7.3.1.05,13]tridecane	Alkaloids	Alkaloids	-	2	203000	189000	183000	218000	197000	248000	243000	224000	205000	187000	189000	187000	184000	371000	321000	325000	274000	297000	-	-
Zajp000573	144	84.1	143	C7H13NO2	[M+H]+	N-(4-oxopentyl)-acetamide	Alkaloids	Alkaloids	-	3	756000	352000	547000	2130000	2010000	1740000	1790000	2590000	2260000	1550000	2430000	1600000	968000	682000	756000	1360000	1570000	1350000	-	-
pmp001229	209	125	208	C12H16O3	[M+H]+	Senkyunolide K	Others	Lactones	114569-33-4	1	281000	148000	100000	275000	119000	350000	340000	268000	269000	118000	90400	87500	183000	157000	147000	202000	192000	171000	-	-
Lmsp003655	521	131	520	C26H32O11	[M+H]+	Dehydrodiconiferyl alcohol-gamma'-O-glucoside*	Lignans and Coumarins	Lignans	-	1	1450000	3370000	426000	1010000	654000	7900000	1960000	312000	235000	269000	329000	349000	3670000	1940000	882000	1090000	1210000	1290000	-	-
Wcdp009119	279	81.1	278	C18H30O2	[M+H]+	Elaidolinolenic acid	Phenolic acids	Phenolic acids	28290-79-1	2	144000	107000	114000	148000	171000	920000	631000	530000	444000	177000	189000	157000	105000	2040000	1320000	1110000	968000	956000	-	-
MWStz073	102	84.1	101	C4H7NO2	[M+H]+	5-Hydroxy-2-pyrrolidinone	Alkaloids	Pyrrole alkaloids	62312-55-4	3	105000	100000	71200	422000	459000	453000	246000	92900	230000	227000	269000	235000	304000	339000	354000	306000	269000	261000	-	-
MW0139629	285	119	286	C16H14O5	[M-H]-	Sakuranetin	Flavonoids	Flavanones	2957-21-3	3	20600	85200	3900	28200	31200	763000	115000	3360	3700	633	6010	702	25500	59000	30700	78000	68700	81400	C09833	ko00941,ko01110
Wbmn00859	383	191	384	C20H16O8	[M-H]-	vitelignin A	Lignans and Coumarins	Lignans	-	1	58700	69600	58500	4560	7160	8130	5740	15900	14500	76200	26000	37600	9510	41500	55800	55100	47000	48100	-	-
Hmqp002567	284	147	283	C17H17NO3	[M+H]+	4-Hydroxycinnamic acid p-hydroxyphenethylamine*	Phenolic acids	Phenolic acids	-	2	27200	42800	38200	1390	2620	49300	6220	7750	5990	6980	2660	15300	4450	5620	1620	13500	13000	15300	-	-
Zmwp005562	284	147	283	C17H17NO3	[M+H]+	cis-N-p-Coumaroyltyramine*	Alkaloids	Phenolamine	-	2	27200	42800	38200	1390	2620	49300	6220	7750	5990	6980	2660	15300	4450	5620	1620	13500	13000	15300	-	-
Zmhn000892	301	139	302	C13H18O8	[M-H]-	4-O-Glucosyl-3,4-dihydroxybenzyl alcohol	Phenolic acids	Phenolic acids	-	1	5350000	2710000	4800000	1040000	1090000	940000	1590000	3710000	3660000	1900000	1170000	3770000	1930000	1460000	1520000	2050000	2320000	2430000	-	-
Zmwp002913	332	272	331	C18H21NO5	[M+H]+	Undulatine*	Alkaloids	Isoquinoline alkaloids	6882-09-03	1	872000	772000	983000	824000	890000	773000	1810000	9450000	5490000	1350000	1460000	1570000	1630000	1440000	1310000	2220000	2030000	1860000	-	-
Wcsp003033	332	225	331	C18H21NO5	[M+H]+	11-Hydroxy-3,4-dihydro-3-methoxygraciline*	Alkaloids	Alkaloids	-	1	5720000	5110000	6110000	2570000	1980000	2050000	138000	208000	127000	18000	281000	10700	47000	33400	16400	2120000	2160000	1840000	-	-
Wccp003403	294	202	293	C14H15NO6	[M+H]+	2,3,4-trihydroxy-2,3,4,4a,5,11b-hexahydro-1H-[1,3]dioxolo[4,5-j]phenanthridin-6-one	Alkaloids	Alkaloids	-	2	26500000	19900000	25900000	12400000	11100000	11300000	26400000	14700000	28600000	13200000	4180000	21600000	7420000	6980000	10000000	15300000	13300000	13100000	-	-
Wcsp001211	290	272	289	C16H19NO4	[M+H]+	zephyranthine	Alkaloids	Alkaloids	2030-55-9	1	27200000	19900000	12800000	32200000	39000000	37900000	37700000	29200000	27600000	35300000	23200000	36500000	23100000	30400000	37900000	27500000	24100000	23300000	-	-
Wcdp010708	263	81.1	262	C18H30O	[M+H]+	Octadeca-2,9,12,15-tetraen-1-ol	Others	Others	-	1	11500000	8810000	8930000	12300000	12300000	10100000	6320000	2090000	4020000	3600000	5560000	2200000	4060000	1890000	2720000	7340000	6240000	6410000	-	-
Lcyn000106	551	193	552	C26H32O13	[M-H]-	Dichotomoside A	Lignans and Coumarins	Lignans	-	1	1200000	1810000	1090000	360000	362000	613000	615000	745000	141000	391000	381000	579000	798000	356000	260000	630000	660000	746000	-	-
pmb0069	122	105	121	C7H7NO	[M+H]+	Benzamide	Alkaloids	Alkaloids	55-21-0	3	82500	226000	110000	120000	169000	159000	210000	119000	258000	153000	179000	154000	123000	155000	69800	143000	143000	166000	C09815	-
Wbwp011247	463	463	462	C30H38O4	[M+H]+	lancilactone B	Lignans and Coumarins	Lignans	218915-16-3	2	1060000	744000	1060000	997000	730000	691000	595000	918000	915000	506000	886000	841000	667000	975000	758000	830000	978000	855000	-	-
MWS1872	225	105	224	C14H8O3	[M+H]+	1-Hydroxyanthraquinone	Quinones	Anthraquinone	129-43-1	2	98600	116000	70500	133000	89100	136000	153000	138000	144000	76000	93900	83400	70500	70100	63200	109000	99500	90800	C02980	-
Zmsp002927	318	286	317	C17H19NO5	[M+H]+	6β-Hydroxycrinamine	Alkaloids	Isoquinoline alkaloids	-	1	4710000	3840000	5580000	2130000	2510000	2010000	13200000	23900000	8320000	171000	10900000	136000	76600	63800	28900	6300000	6140000	5310000	-	-
Lacn005311	533	371	534	C26H30O12	[M-H]-	Phellatin	Flavonoids	Flavonols	-	2	126000	126000	80500	15100	3820	7570	151000	182000	37200	60800	13400	74000	39300	22300	7560	57900	68600	67000	-	-
MWSmce461	102	56.1	101	C4H7NO2	[M+H]+	L-Azetidine-2-carboxylic acid*	Alkaloids	Alkaloids	2133-34-8	3	1330000	1620000	1100000	4260000	4240000	4230000	1980000	774000	3480000	2390000	2100000	1910000	2790000	2660000	3150000	2720000	2650000	2290000	-	-
MWSmce331	102	56.1	101	C4H7NO2	[M+H]+	Azetidine-2-carboxylic acid*	Alkaloids	Alkaloids	2517-04-06	3	1330000	1620000	1100000	4260000	4240000	4230000	1980000	774000	3480000	2390000	2100000	1910000	2790000	2660000	3150000	2720000	2650000	2290000	C08267	-
MWSmce294	209	153	208	C12H16O3	[M+H]+	Elemicin	Phenolic acids	Phenolic acids	487-11-6	1	1180000	547000	411000	1120000	531000	1430000	1450000	1120000	1050000	455000	424000	368000	713000	545000	615000	821000	770000	685000	C10451	-
Wccp003665	316	137	315	C17H17NO5	[M+H]+	3-O-Demethyl Macronine	Alkaloids	Alkaloids	-	2	1130000	2580000	1600000	161000	289000	218000	198000	530000	353000	85400	184000	129000	257000	257000	192000	653000	730000	611000	-	-
mws0749	137	93	138	C7H6O3	[M-H]-	4-Hydroxybenzoic acid	Phenolic acids	Phenolic acids	99-96-7	2	614000	693000	604000	336000	456000	523000	506000	513000	581000	659000	631000	775000	1130000	999000	1170000	552000	659000	639000	C00156	ko00130,ko00790,ko01100,ko01110,ko01240
Zahp013728	338	338	337	C22H43NO	[M+H]+	octadecanoic acid pyrrolidide	Alkaloids	Alkaloids	33707-76-5	3	270000	266000	345000	308000	316000	292000	237000	227000	249000	241000	192000	245000	222000	277000	236000	289000	267000	240000	-	-
Zmzp005934	284	102	283	C18H37NO	[M+H]+	Stearamide	Alkaloids	Alkaloids	124-26-5	3	5990000	7950000	7940000	7460000	5340000	6590000	6580000	6000000	6110000	6210000	5220000	6920000	5770000	6700000	5180000	6170000	5110000	5680000	C13846	-
Hmtn001120	315	153	316	C14H20O8	[M-H]-	5-(2-Hydroxyethyl)-2-O-glucosylphenol*	Phenolic acids	Phenolic acids	-	2	197000	76000	171000	128000	96700	118000	183000	416000	220000	183000	122000	251000	155000	144000	121000	139000	164000	165000	-	-
pmp000383	419	257	418	C21H22O9	[M+H]+	Liquiritigenin-4'-O-Glucoside (Liquiritin)*	Flavonoids	Flavanones	551-15-5	1	645000	391000	476000	1740000	1460000	1840000	207000	189000	12900	390000	90300	638000	153000	232000	176000	582000	605000	504000	C16989	-
pmn001420	341	179	342	C15H18O9	[M-H]-	1-O-Caffeoyl-β-D-glucose*	Phenolic acids	Phenolic acids	14364-08-0	1	2160000	4500000	2810000	1180000	1720000	1990000	4640000	2760000	1260000	6610000	7190000	8520000	5720000	8200000	6540000	3580000	4300000	3810000	C10433	-
pme1002	138	103	137	C8H11NO	[M+H]+	L-Tyramine	Alkaloids	Alkaloids	51-67-2	1	16700000	21800000	23300000	18400000	23300000	23900000	14100000	4100000	3040000	19800000	10300000	13800000	37000000	29400000	34100000	16600000	19700000	16900000	C00483	ko00350,ko00950,ko01100,ko01110,ko01240
Lmqp003022	161	133	160	C10H8O2	[M+H]+	2,3-Dihydro-1,4-naphthoquinone	Quinones	Quinones	21545-31-3	1	1030000	931000	1160000	601000	36500	465000	1350000	1740000	2080000	2190000	1200000	2100000	671000	548000	365000	905000	1050000	883000	-	-
MWSmce284	155	95.1	154	C8H10O3	[M+H]+	3,4-Dimethoxyphenol	Phenolic acids	Phenolic acids	2033-89-8	3	87900	68600	86800	175000	279000	1580000	85000	35400	50000	497000	57700	141000	47500	101000	76700	202000	207000	173000	-	-
Lmmn003663	329	167	330	C14H18O9	[M-H]-	5-Glucosyloxy-2-Hydroxybenzoic acid methyl ester	Phenolic acids	Phenolic acids	-	1	15400	5470	12100	131000	211000	1190000	8260	26000	2280	39100	58900	39900	14300	6840	9880	110000	120000	133000	-	-
Saln003696	595	183	596	C27H32O15	[M-H]-	Jaslanceoside A	Terpenoids	Monoterpenoids	-	2	247000	166000	162000	36300	36400	22900	76000	48000	46500	81100	18900	103000	123000	73400	68300	170000	162000	140000	-	-
Wccp006497	197	151	196	C10H12O4	[M+H]+	Ebracteolata Cpd B	Others	Others	83459-37-4	2	11800	29200	29700	67900	37900	1930000	60000	26600	6030	54000	22800	48300	8960	21400	9940	152000	143000	125000	-	-
zjbp110804	357	307	356	C20H20O6	[M+H]+	6,7-dimethoxy-2-[2-(4'-hydroxy-3'-methoxyphenyl)ethyl]chromone*	Others	Chromone	-	3	47200	210000	5200	12900	9100	368000	19200	10000	4510	4530	7820	2860	7360	23000	3950	53300	57200	47100	-	-
Hmyp002656	222	130	221	C11H11NO4	[M+H]+	Methyl dioxindole-3-acetate	Alkaloids	Plumerane	57061-18-4	2	556000	450000	460000	123000	131000	208000	585000	403000	435000	285000	350000	381000	909000	705000	519000	375000	452000	399000	-	-
mws2367	299	119	300	C14H20O7	[M-H]-	Salidroside	Phenolic acids	Phenolic acids	10338-51-9	1	101000	72800	97200	76700	70400	235000	62000	35000	18600	23400	36000	24700	23100	22900	24600	53600	63700	64000	C06046	ko00350,ko01100
Wdbp008550	301	245	300	C18H20O4	[M+H]+	Stemanthrene C*	Others	Others	-	1	69100	59300	74000	54200	58000	65600	69500	67300	71000	82600	54500	70200	71300	47200	62900	79800	66400	78100	-	-
Hmln000873	331	169	332	C13H16O10	[M-H]-	2-O-Galloyl-D-glucose	Phenolic acids	Phenolic acids	-	3	62600	29600	35300	13300	10200	17200	28400	13800	12500	12100	13200	32700	16300	10100	8170	11900	11800	14000	-	-
Wbjp002156	231	185	230	C13H14N2O2	[M+H]+	2-[(9R)-1,2,3,9-tetrahydropyrrolo[2,1-b]quinazolin-9-yl]acetic acid	Alkaloids	Alkaloids	-	2	4520000	5340000	4790000	8320000	7570000	7430000	2820000	3350000	157000	3790000	4500000	3140000	4560000	4090000	4690000	4520000	4890000	5480000	-	-
Qmyp101303	217	83.1	216	C15H20O	[M+H]+	Solanoid B	Terpenoids	Sesquiterpenoids	-	2	31900	24300	16700	40500	20800	46900	41200	39100	33800	18400	21900	21100	23500	21100	17400	27700	22800	25100	-	-
Zmwp003424	334	316	333	C17H19NO6	[M+H]+	Lycorenium A	Alkaloids	Alkaloids	-	3	1330000	986000	1560000	1160000	526000	574000	256000	671000	840000	387000	277000	439000	275000	1400000	215000	791000	708000	864000	-	-
Qmyp101120	235	133	234	C15H22O2	[M+H]+	Procurcumenol*	Terpenoids	Sesquiterpenoids	-	2	43100	52800	21400	45700	19600	59900	51300	41800	43300	17700	29700	18300	50900	48000	26900	35200	41500	35100	-	-
Lahp005848	195	163	194	C10H10O4	[M+H]+	pithecellobiumol B	Others	Chromone	-	1	3190000	3210000	2820000	3050000	3200000	3440000	3320000	3200000	2660000	2740000	3130000	3040000	2530000	2670000	2760000	3460000	3340000	2860000	-	-
Hmmp002767	853	853	852	C45H73NO14	[M+H]+	α-Chaconine	Alkaloids	Steroid alkaloids	20562-03-2	2	3000000	1890000	2320000	651000	1770000	975000	2930000	1940000	1920000	1410000	1600000	1560000	5260000	3360000	2890000	2160000	2320000	1900000	C10796	-
Wdmp005533	513	351	512	C27H32N2O8	[M+H]+	(6R,7S,11aS,12aR,Z)-9-ethylidene-8-(((2S)-3,4,5-trihydroxy-6-(hydroxymethyl)tetrahydro-2H-pyran-2-yl)oxy)-8,9,10,11,11a,12-hexahydro-6H-6,10:11,12a-dimethanoindolo[3,2-b]quinolizin-13-ylacetate	Alkaloids	Plumerane	-	1	19600	26900	29700	38400	38700	24700	44900	76100	38200	27100	8050	22700	32500	40000	15600	22400	27400	25100	-	-
Zmbp000490	158	112	157	C8H15NO2	[M+H]+	Valerine	Alkaloids	Alkaloids	-	2	7500000	9720000	10800000	6490000	7720000	6120000	14800000	16500000	14200000	6460000	9380000	7120000	14800000	15500000	14300000	8860000	10400000	10700000	-	-
Qagp003587	219	131	218	C13H18N2O	[M+H]+	N-Monocinnamoylputrescine	Alkaloids	Phenolamine	-	3	173000	64200	88800	129000	26000	104000	129000	69100	27500	37300	126000	54100	78400	41700	96400	54500	59100	66500	-	-
MWSmce208	169	115	168	C11H8N2	[M+H]+	Norharmane; Beta-Carboline	Alkaloids	Plumerane	244-63-3	2	913000	695000	755000	367000	389000	335000	529000	500000	293000	200000	217000	223000	244000	183000	126000	452000	377000	386000	-	-
Wbsp001776	292	274	291	C17H25NO3	[M+H]+	(1S,4S,6R,9S,15R)-15-hydroxy-6-methyl-13-azatetracyclo[11.3.1.01,9.04,9]heptadecane-2,8-dione*	Alkaloids	Alkaloids	-	2	0	0	0	7180000	7110000	7120000	3520000	18700000	3290000	1740000	2130000	2240000	1230000	482000	1120000	5020000	4810000	4120000	-	-
Lacp003545	298	266	297	C18H19NO3	[M+H]+	Erythraline	Alkaloids	Pyrrole alkaloids	466-77-3	2	1370000	1850000	1220000	4250000	5330000	4090000	1800000	768000	4330000	1540000	870000	1380000	1690000	1940000	1540000	2090000	2150000	1770000	-	-
Wasn000410	245	153	246	C6H15O8P	[M-H]-	sn-glycero-3-phospho-(1'-sn-glycerol)	Others	Others	-	1	5670000	9260000	5370000	14300000	39000000	21500000	598000	463000	2280000	15400000	23400000	11700000	6100000	7520000	5300000	15100000	13800000	17000000	-	-
mws0043	403	373	402	C21H22O8	[M+H]+	Nobiletin (5,6,7,8,3',4'-Hexamethoxyflavone)	Flavonoids	Flavones	478-01-3	2	402000	362000	696000	70500	59600	64000	146000	45800	56900	45400	53400	50300	120000	75000	65500	152000	140000	123000	C10112	-
Lhfp112926	343	163	342	C20H22O5	[M+H]+	Myricatomentogenin*	Others	Others	-	1	758000	462000	534000	693000	1030000	897000	423000	929000	316000	789000	1040000	999000	725000	404000	909000	952000	1050000	855000	-	-
Wdmp007253	318	219	317	C21H35NO	[M+H]+	1-(1-aminoethyl)-9a,11a-dimethyl-tetradecahydrocyclopenta[a]phenanthren-7-one	Alkaloids	Plumerane	-	2	900000	843000	838000	840000	1070000	834000	963000	996000	862000	922000	972000	813000	799000	814000	882000	890000	947000	771000	-	-
Lmxp000939	136	119	135	C5H5N5	[M+H]+	Zarzissine	Alkaloids	Alkaloids	160568-14-9	2	5370000	7650000	6170000	5630000	7020000	7850000	5570000	6760000	10000000	6730000	8780000	6420000	4030000	4340000	4660000	6530000	7670000	6370000	-	-
MW0129528	257	133	256	C16H16O3	[M+H]+	1-(2-Hydroxy-4-methoxyphenyl)-3-phenylpropan-1-one	Others	Ketone compounds	22141-31-7	3	12400	229000	7650	6300	15400	2620000	4680000	23700	90800	12700	7450	3900	56400	62000	296000	637000	524000	549000	-	-
Lmgp000796	150	61	149	C8H7NO2	[M+H]+	4-Hydroxymandelonitrile	Alkaloids	Phenolamine	13093-65-7	3	217000	206000	214000	26500	51100	69600	117000	118000	107000	63700	118000	50900	31200	29600	20700	125000	121000	102000	C00650	-
Wcgp002561	265	119	264	C15H20O4	[M+H]+	6-(1,2-dihydroxyethyl)-3-hydroxy-2,2,5,7-tetramethyl-3H-inden-1-one*	Others	Others	-	3	255000	182000	227000	207000	136000	163000	160000	134000	102000	222000	66900	249000	152000	96100	88500	136000	154000	168000	-	-
Zahp012750	607	607	606	C36H38N4O5	[M+H]+	Methyl pheophorbide a	Alkaloids	Alkaloids	-	2	238000	166000	177000	184000	218000	175000	215000	260000	182000	177000	167000	180000	98600	59100	182000	172000	143000	171000	-	-
Zahn006118	277	134	278	C16H22O4	[M-H]-	1,3-Benzodioxole-5-nonanoic acid	Others	Others	834900-22-0	2	9980	9830	10100	9970	9080	10100	9290	9870	10500	8720	9480	8760	8350	9020	8910	11100	10100	9000	-	-
Wchn003892	355	193	356	C16H20O9	[M-H]-	Juglanoside E*	Others	Others	-	1	510000	144000	513000	32100	28100	24300	41800	40200	49000	161000	225000	194000	35400	39800	34200	145000	162000	131000	-	-
mws1622	219	111	218	C15H22O	[M+H]+	α-Cyperone	Others	Ketone compounds	473-08-5	2	240000	104000	42100	176000	55900	217000	194000	188000	157000	72400	86500	58000	108000	78800	88400	129000	119000	105000	C17090	-
Wmmn000125	525	167	526	C24H30O13	[M-H]-	mudanpioside E*	Others	Others	172705-25-8	2	894000	712000	836000	40400	36600	51600	62500	50300	17500	10600	17100	16500	56900	29600	25000	169000	206000	203000	-	-
Wcgp003250	163	103	162	C10H10O2	[M+H]+	2-Methyl-3-hydroxyindan-1-one	Others	Others	-	1	3030000	4650000	1610000	1230000	699000	4270000	2060000	572000	201000	900000	834000	938000	2430000	2120000	927000	1490000	1770000	1480000	-	-
Cmsp002787	227	181	226	C11H14O5	[M+H]+	3,4'-Dihydroxy-3',5'-dimethoxypropiophenone	Phenolic acids	Phenolic acids	136196-47-9	3	220000	238000	268000	158000	202000	189000	406000	582000	262000	88500	74600	119000	129000	38600	150000	268000	276000	225000	-	-
Wcdp006741	520	184	519	C26H50NO7P	[M+H]+	1-(9Z,12Z-Octadecadienoyl)-Sn-Glycero-3-Phosphocholine	Others	Others	22252-07-9	1	57100000	43800000	38600000	8130000	9130000	19100000	5830000	12100000	5380000	6050000	7730000	6190000	15600000	5460000	5130000	19300000	16800000	15800000	-	-
pme0460	291	139	290	C15H14O6	[M+H]+	Epicatechin	Flavonoids	Flavanols	490-46-0	3	320000	267000	293000	44700	43500	54300	7050	23600	40000	28800	77500	17500	122000	152000	106000	94600	116000	113000	C09727	ko00941,ko01100,ko01110
Lmyn002540	368	162	369	C16H19NO9	[M-H]-	Dioxindole-3-acetyl-3-O-glucoside	Alkaloids	Plumerane	-	3	65800	24000	48400	13800	8680	11700	10700	12900	7290	8960	8480	19900	13900	9900	13500	22900	19500	18900	-	-
Wcsp001338	436	274	435	C20H21NO10	[M+H]+	7-hydroxy-2,3,4-triacetoxy	Alkaloids	Alkaloids	-	3	4050000	3440000	3540000	1340000	1060000	1610000	1130000	1610000	3420000	2570000	2630000	1960000	2570000	2220000	1930000	2430000	3010000	2770000	-	-
Wcjp003053	478	195	477	C22H23NO11	[M+H]+	Trans-Dihydronarciclasine Peracetate	Alkaloids	Alkaloids	-	3	0	0	0	0	0	0	0	0	0	41800	67000	72900	0	0	0	60800	66400	53500	-	-
Labn002264	315	153	316	C14H20O8	[M-H]-	Grevilloside G*	Phenolic acids	Phenolic acids	791846-69-0	2	1390000	663000	1320000	293000	283000	337000	825000	865000	938000	790000	301000	1630000	534000	481000	489000	567000	676000	698000	-	-
HX1348	133	69	132	C5H8O4	[M+H]+	2-hydroxymethyl-D-ribono-γ-lactone	Others	Others	-	3	386000	313000	469000	90100	93900	80900	118000	168000	117000	87100	261000	98700	71800	55300	60700	164000	133000	144000	-	-
Lshp011010	276	175	275	C16H21NO3	[M+H]+	N-Demethyllycoramine	Alkaloids	Alkaloids	-	1	10600000	9740000	13600000	1400000	699000	752000	12700000	17400000	8190000	1610000	4680000	2000000	181000	158000	146000	9830000	7900000	9080000	-	-
Hmcp003783	211	193	210	C13H10N2O	[M+H]+	1-Acetyl-β-carboline	Alkaloids	Plumerane	-	3	72700	104000	51300	66300	60400	87600	90600	52700	51100	72100	57100	70600	56000	57100	88500	96800	102000	82400	-	-
Wcdp007560	522	184	521	C26H52NO7P	[M+H]+	1-Vaccenoyl-Glycero-3-Phosphocholine	Others	Others	-	2	15100000	11000000	9480000	3450000	3360000	7070000	2480000	5850000	1650000	1960000	1930000	2010000	3860000	1430000	1400000	5800000	5060000	4680000	-	-
pme1841	103	86.1	102	C5H14N2	[M+H]+	Cadaverine	Alkaloids	Alkaloids	462-94-2	3	38600	35200	34300	33200	31800	36500	25600	17900	27500	20800	23800	18400	24200	23300	25300	32200	26700	26800	C01672	ko00310,ko00470,ko00480,ko00960,ko01100,ko01110
MW0003631	177	117	154	C8H10O3	[M+Na]+	Hydroxytyrosol	Phenolic acids	Phenolic acids	10597-60-1	3	211000	217000	241000	145000	95100	149000	90400	144000	38500	155000	112000	147000	270000	234000	145000	153000	183000	151000	-	-
Zbsp003876	169	123	168	C8H8O4	[M+H]+	2,6-Dimethoxy-1,4-benzoquinone	Quinones	Quinones	530-55-2	1	108000	62600	68700	349000	452000	1840000	51700	69100	31800	71200	147000	92000	47000	36700	21500	262000	281000	226000	C10331	-
Lhfp112913	177	131	176	C10H8O3	[M+H]+	Dihydrojuglone	Quinones	Quinones	-	2	408000	415000	512000	181000	117000	231000	263000	454000	395000	327000	216000	368000	217000	170000	117000	241000	299000	261000	-	-
Lmhn002321	461	167	462	C21H18O12	[M-H]-	Vnilloylcaffeoyltartaric acid	Phenolic acids	Phenolic acids	-	3	12100	3180	9720	26700	39000	33000	8850	3520	4190	3500	3690	7430	16700	21600	15300	9090	9980	11300	-	-
pmb1912	474	327	473	C20H23N7O7	[M+H]+	10-Formyltetrahydrofolic Acid	Alkaloids	Alkaloids	2800-34-2	1	10800000	18500000	11000000	17700000	16400000	14200000	7910000	12400000	22600000	21900000	28000000	16700000	14100000	8550000	13500000	13600000	14000000	16600000	C00234	ko00670,ko00970,ko01100,ko01200,ko01240
Lmtn002233	327	165	328	C15H20O8	[M-H]-	Androsin	Phenolic acids	Phenolic acids	531-28-2	1	81000	98600	95000	154000	195000	200000	202000	26200	27600	90900	95100	125000	256000	277000	252000	118000	146000	125000	-	-
pmp001287	120	103	119	C8H9N	[M+H]+	N-Benzylmethylene isomethylamine	Alkaloids	Alkaloids	-	1	12300000	9800000	11600000	2350000	2770000	3380000	3880000	6610000	5800000	2770000	4370000	2350000	1910000	1580000	1580000	6370000	5300000	5260000	-	-
Hmgn001653	137	93	138	C7H6O3	[M-H]-	Protocatechualdehyde*	Others	Aldehyde compounds	139-85-5	1	282000	400000	352000	362000	306000	300000	213000	295000	318000	469000	299000	451000	648000	610000	622000	327000	379000	410000	C16700	ko00950
Wbsp000054	320	320	319	C18H25NO4	[M+H]+	Cernupalhine A	Alkaloids	Alkaloids	-	2	1050000	477000	1130000	799000	1380000	877000	503000	366000	300000	948000	316000	699000	775000	940000	720000	675000	735000	841000	-	-
Lhmp121005	521	131	520	C26H32O11	[M+H]+	Symplocosin*	Lignans and Coumarins	Lignans	-	1	640000	3620000	285000	1230000	424000	6350000	2480000	254000	106000	266000	364000	219000	2720000	2090000	971000	1340000	1200000	1070000	-	-
MWSmce564	219	159	218	C15H22O	[M+H]+	Germacrone	Terpenoids	Sesquiterpenoids	6902-91-6	2	124000	131000	107000	194000	166000	235000	137000	144000	135000	161000	151000	117000	168000	163000	167000	126000	146000	117000	C16966	-
Lshp011101	470	308	469	C20H23NO12	[M+H]+	Narciclasine 4-Glucopyranoside	Alkaloids	Piperidine alkaloids	-	2	1030000	1170000	1510000	301000	162000	232000	557000	622000	354000	168000	159000	167000	260000	268000	191000	423000	344000	421000	-	-
Lakn004098	281	171	282	C15H22O5	[M-H]-	Dihydrophaseic acid	Terpenoids	Sesquiterpenoids	41756-77-8	2	5860	9040	7600	2470	2820	1510	3850	22200	4140	7900	16000	10200	12300	14000	11300	9700	8090	7930	C15971	ko00906
pma2987	142	124	141	C6H11N3O	[M+H]+	Histidinol	Alkaloids	Alkaloids	501-28-0	3	13700000	14500000	16500000	11300000	12900000	14100000	13500000	15600000	12200000	12300000	12800000	12900000	13200000	13200000	12700000	16000000	13600000	13000000	C00860	ko00340,ko01100,ko01110,ko01230
MWSmce548	118	58.1	117	C5H11NO2	[M+H]+	Betaine	Alkaloids	Alkaloids	107-43-7	2	5630000	6330000	5060000	3860000	4920000	5000000	5720000	2690000	7540000	7040000	6200000	7960000	3070000	3160000	2970000	6040000	6050000	4920000	C00719	ko00260,ko01100,ko02010
Lmzn001983	375	135	376	C16H24O10	[M-H]-	D-Threo-guaiacylglycerol-7-O-β-D-glucoside	Phenolic acids	Phenolic acids	-	2	4800	7010	5220	3890	1830	10500	6480	5780	12100	13500	11000	14000	22300	27900	20700	9310	11300	11600	-	-
mws1175	271	167	270	C16H14O4	[M+H]+	Pinostrobin	Flavonoids	Flavanones	480-37-5	1	8820	103000	6230	5280	5960	10200	2690000	7430	27700	2290	4150	8900	4710	3060	4200	222000	182000	183000	C16419	ko00941
Layp007325	257	137	256	C15H12O4	[M+H]+	Bauhinoxepin J*	Others	Alcohol compounds	942513-05-5	1	6470	19200	1660	7980	36700	1080000	95600	7250	5590	5870	2840	1840	9030	51800	19500	98800	86600	78700	-	-
Lmxn006423	150	122	151	C7H5NOS	[M-H]-	2(3H)-Benzothiazolone	Alkaloids	Alkaloids	934-34-9	1	34200	47900	23500	44200	35200	59900	67800	60000	75400	39400	42000	34800	28600	26000	19500	33900	39200	42800	-	-
Lman002117	341	179	342	C15H18O9	[M-H]-	Grevilloside Q	Others	Ketone compounds	1708967-64-9	2	257000	141000	219000	470000	327000	411000	538000	67200	119000	135000	231000	185000	209000	217000	79600	198000	249000	238000	-	-
Zmdp000376	130	84.1	129	C5H11N3O	[M+H]+	4-Guanidinobutanal	Others	Aldehyde compounds	-	3	17600000	15100000	16900000	303000	1310000	430000	29500000	10200000	23800000	1170000	543000	899000	1260000	1120000	1200000	14800000	12300000	12200000	-	-
Zmwp001739	274	213	273	C16H19NO3	[M+H]+	Kirkine	Alkaloids	Isoquinoline alkaloids	115730-50-2	1	8420000	7860000	6660000	14600000	18100000	17000000	14000000	6750000	2050000	3710000	4440000	4190000	3430000	4140000	4390000	8970000	7530000	7270000	-	-
Wccp003194	292	232	291	C14H13NO6	[M+H]+	Lycoricidine; 7-Deoxynarciclasine	Alkaloids	Alkaloids	19622-83-4	1	1560000	1210000	1470000	971000	971000	941000	1290000	1000000	995000	911000	653000	1040000	716000	556000	555000	1230000	1020000	1010000	C08531	-
pmb0819	157	130	156	C10H8N2	[M+H]+	3-Indoleacetonitrile	Alkaloids	Plumerane	771-51-7	3	2990000	3980000	4180000	1250000	1610000	1690000	2450000	2680000	3130000	2310000	3420000	2060000	1290000	1490000	1480000	2450000	2400000	2950000	C02938	ko00380,ko01100
mws0983	326	62.1	325	C20H39NO2	[M+H]+	N-Oleoylethanolamine	Alkaloids	Alkaloids	111-58-0	3	10200	6430	8450	28500	16600	17000	44000	7520	2790	3440	1930	3110	4330	6820	4010	11800	9350	10200	C20792	-
MW0112082	136	91.1	135	C8H9NO	[M+H]+	2-Aminoacetophenone	Others	Ketone compounds	613-89-8	3	2230000	1700000	1600000	604000	927000	868000	661000	1050000	1440000	684000	1290000	759000	460000	440000	365000	1150000	1170000	938000	-	-
Wcsp002025	304	137	303	C17H21NO4	[M+H]+	carinatine*	Alkaloids	Alkaloids	64937-89-9	1	6040000	4710000	4720000	2400000	2770000	2370000	1690000	5080000	7670000	1010000	1870000	1320000	1140000	909000	758000	3260000	2960000	2570000	-	-
MWSHY0017	273	153	272	C15H12O5	[M+H]+	Naringenin (5,7,4'-Trihydroxyflavanone)	Flavonoids	Flavanones	480-41-1	3	32800	24600	9680	16900	25200	344000	31100	9560	10300	27700	5050	4960	20300	71300	58900	46900	37000	42600	C00509	ko00941,ko00943,ko01100,ko01110
MW0114597	356	150	357	C15H19NO9	[M-H]-	HMBOA-Glc	Alkaloids	Alkaloids	17622-26-3	3	7640	13600	8410	10100	8360	13600	44800	44100	26500	34800	15600	35600	20800	22800	7970	13700	17400	15300	-	-
MW0137871	345	311	286	C15H10O6	[M+CH3COO]-	Datiscetin	Flavonoids	Flavones	480-15-9	3	138000	105000	133000	5710	6800	5500	9240	19300	15000	23400	39200	31000	33000	35800	38800	42400	52000	42800	C10036	-
Xmgp006913	341	137	340	C20H20O5	[M+H]+	2,4,2',4'-tetrahydroxy-3'-prenylchalcone	Flavonoids	Chalcones	-	3	81800	435000	48800	32100	40100	797000	67000	30000	14600	11900	62700	15000	50800	142000	34800	119000	107000	94000	-	-
Zjhp090604	287	167	286	C16H14O5	[M+H]+	5,7-dihydroxy-3-(4'-hydroxybenzyl)-chroman-4-one	Flavonoids	Other Flavonoids	-	3	114000	466000	9710	156000	170000	3960000	671000	10700	22300	9180	34300	4730	105000	255000	130000	446000	372000	360000	-	-
MW0136702	239	195	240	C15H12O3	[M-H]-	6-Hydroxyflavanone	Others	Ketone compounds	4250-77-5	3	40400	39800	36500	36100	33300	36600	80500	37300	36300	31400	32600	31000	33500	33200	32100	42400	36000	33800	-	-
pma0633	349	203	348	C19H32N4O2	[M+H]+	N-p-Coumaroylspermine	Alkaloids	Phenolamine	130210-35-4	3	80000	65700	79800	135000	139000	135000	55200	32600	84300	92600	64700	81800	51400	44200	52700	96000	104000	81800	-	-
mws1350	181	151	182	C9H10O4	[M-H]-	Syringaldehyde; 4-Hydroxy-3,5-Dimethoxybenzaldehyde	Others	Aldehyde compounds	134-96-3	2	3340	5650	18800	11000	10700	31100	26400	9790	24600	54000	17300	27600	0	0	0	10200	12700	12500	-	-
Zabp008827	351	107	350	C22H22O4	[M+H]+	3',5-dihydroxy-2-(p-hydroxybenzyl)-3-methoxybibenzyl	Others	Others	-	3	26700	22100	23100	21800	28800	18900	18900	17600	32700	16700	11700	21200	11700	13400	10300	20800	23200	18200	-	-
Wcdp006247	518	184	517	C26H48NO7P	[M+H]+	1-18:3-LysoPC	Others	Others	-	1	2580000	1790000	2090000	119000	85400	179000	96700	352000	136000	86000	147000	84300	487000	167000	134000	643000	555000	508000	-	-
Lmlp006175	435	273	434	C21H22O10	[M+H]+	Isosalipurposide (Phlorizin Chalcone)*	Flavonoids	Chalcones	4547-85-7	2	280000	178000	335000	32600	19700	33500	140000	283000	42100	266000	86000	424000	664000	557000	282000	281000	238000	223000	C16406	ko00941
Lmtn001569	474	312	475	C20H29NO12	[M-H]-	2-Glucosyl-glucosyloxy-2-phenylacetic acid amide	Alkaloids	Alkaloids	-	2	38800	5360	34700	1350	6150	8270	67700	48400	17400	34200	24100	73400	31400	26800	13600	20300	19400	16000	-	-
MW0004115	190	59	167	C9H13NO2	[M+Na]+	4-Methoxytyramine	Phenolic acids	Phenolic acids	3213-30-7	3	581000	450000	575000	41500	98100	76000	47600	22700	54000	16000	101000	36700	33300	18700	41700	148000	189000	164000	-	-
Wbkn005292	519	357	520	C26H32O11	[M-H]-	[(1S,2S,3S,7R,9R,13S,14R,15R,17S)-3,15-diacetyloxy-7-hydroxy-2,6,14-trimethyl-4,11,16-trioxo-10-oxatetracyclo[7.7.1.02,7.013,17]heptadec-5-en-17-yl]methylacetate*	Terpenoids	Ditepenoids	-	1	4400	6370	6700	82000	26500	65300	50600	12300	2940	14700	5650	14700	26800	48800	11700	28600	29700	23500	-	-
pmn001681	165	149	166	C10H14O2	[M-H]-	1-(4-Methoxyphenyl)-1-propanol	Phenolic acids	Phenolic acids	5349-60-0	3	165000	261000	244000	270000	246000	230000	250000	217000	212000	239000	297000	267000	274000	306000	429000	166000	200000	211000	-	-
mws1038	277	146	278	C11H22N2O4S	[M-H]-	Pantetheine	Alkaloids	Alkaloids	496-65-1	1	52400	40300	62200	25900	21100	21600	22000	17100	23400	18600	22500	17700	32400	36000	23800	21000	26500	22200	C00831	ko00332,ko00770,ko01100,ko01110
Lshp011011	360	149	359	C19H21NO6	[M+H]+	6β-acetoxycrinamine	Alkaloids	Pyridine alkaloids	-	1	791000	417000	1000000	21900000	14500000	14400000	1020000	855000	7630000	93900000	6270000	128000000	431000	284000	217000	18900000	24300000	21700000	-	-
Labn003679	327	147	328	C15H20O8	[M-H]-	(E)-caffeyl alcohol 4-O-β-D-glucopyranoside	Phenolic acids	Phenolic acids	-	1	58200	34300	34600	170000	129000	211000	961000	1970000	41800	56500	51500	65700	561000	467000	242000	267000	337000	332000	-	-
Xmmn002939	341	179	342	C19H18O6	[M-H]-	Methylophiopogonanone A	Flavonoids	Other Flavonoids	74805-92-8	2	67100	72000	97900	36100	54400	53700	131000	48100	36800	158000	132000	220000	179000	216000	151000	88900	106000	114000	-	-
Hmyn001360	299	59	300	C18H20O4	[M-H]-	Doitungbiphenyl A	Phenolic acids	Phenolic acids	-	2	221000	136000	204000	159000	158000	490000	151000	57300	53100	64600	57900	58200	55100	47600	48200	116000	149000	134000	-	-
Zbzp003763	177	134	176	C10H8O3	[M+H]+	11-methoxy viburtinal	Terpenoids	Monoterpenoids	-	3	396000	162000	367000	99400	91600	104000	46700	57300	54500	114000	348000	80500	78800	103000	94500	103000	87300	80900	-	-
Lshp011107	346	213	345	C19H23NO5	[M+H]+	norbutsanguininem	Alkaloids	Alkaloids	-	3	17500	31700	20000	46900	72600	56900	6670	11700	15000	8340	1670	15000	38300	14300	10000	35400	35600	28300	-	-
pmb3023	449	287	450	C21H22O11	[M-H]-	Eriodictyol-8-C-glucoside*	Flavonoids	Flavanones	1023271-51-3	3	74600	42500	59000	27400	17000	22400	27400	16800	44500	75400	23500	145000	51100	73600	55300	40700	41500	50600	-	-
Lmtn002796	449	287	450	C21H22O11	[M-H]-	Aromadendrin-7-O-glucoside*	Flavonoids	Flavanonols	28189-90-4	3	74600	42500	59000	27400	17000	22400	27400	16800	44500	75400	23500	145000	51100	73600	55300	40700	41500	50600	-	-
pmf0085	427	345	426	C30H50O	[M+H]+	9,19-Cyclolanost-24-en-3-ol (Cycloartenol)	Terpenoids	Triterpene	469-38-5	3	127000	66300	112000	124000	124000	120000	112000	106000	59300	109000	67300	106000	113000	112000	117000	143000	115000	117000	C01902	ko00100,ko01100,ko01110
Latp009986	279	149	278	C16H22O4	[M+H]+	6β-Hydroxy-8α-methoxyeremophila-1(10),7(11)-dien-12,8β-olide*	Terpenoids	Sesquiterpenoids	-	1	13000000	19900000	13100000	22100000	22600000	15500000	19000000	12100000	21400000	18600000	17500000	17900000	13800000	16600000	13200000	20600000	16600000	16800000	-	-
Lmxp011770	279	149	278	C16H22O4	[M+H]+	Diisobutyl phthalate*	Phenolic acids	Phenolic acids	84-69-5	1	13000000	19900000	13100000	22100000	22600000	15500000	19000000	12100000	21400000	18600000	17500000	17900000	13800000	16600000	13200000	20600000	16600000	16800000	C15205	-
Lmtn001630	312	150	313	C14H19NO7	[M-H]-	2-Glucosyloxy-2-phenylacetic acid amide	Alkaloids	Alkaloids	-	2	69900	59200	66200	24700	23300	24500	46900	66900	36800	38200	50500	46500	30500	26400	19800	45700	35500	41700	-	-
mws0628	121	92	122	C7H6O2	[M-H]-	4-Hydroxybenzaldehyde	Others	Aldehyde compounds	123-08-0	1	5240000	5380000	5880000	4400000	4570000	4430000	5270000	7130000	8710000	5900000	6640000	5830000	5220000	5340000	5190000	4400000	5360000	5610000	C00633	ko01100
Yhhn000821	431	89	432	C21H20O10	[M-H]-	kwanzoquinone C	Quinones	Anthraquinone	-	1	137000	129000	145000	256000	210000	314000	116000	111000	112000	127000	71000	77500	216000	247000	227000	128000	147000	114000	-	-
Yamn004825	579	339	580	C28H36O13	[M-H]-	Syringaresinol-4'-O-glucoside	Lignans and Coumarins	Lignans	-	2	59100	164000	27800	150000	54900	515000	492000	24800	11700	39900	41000	19500	190000	119000	68500	90100	112000	114000	-	-
Zmhp004830	345	183	344	C15H20O9	[M+H]+	domesticoside	Phenolic acids	Phenolic acids	-	1	37700000	7600000	10900000	40400000	26800000	83600000	4250000	7190000	130000	7170000	5840000	6310000	11900000	527000	447000	19400000	16700000	15100000	-	-
Hmyn000254	297	59	298	C18H18O4	[M-H]-	Tababiphenyl C	Others	Chromone	1644433-50-0	2	104000	121000	95800	147000	119000	114000	107000	64200	123000	169000	125000	217000	375000	267000	390000	163000	174000	207000	-	-
Zmcp102206	381	299	382	C24H30O4	[M-H]-	(Z)-3,8-Dihydro 6,6·;7,3'a-diligustilide	Others	Others	-	1	90200	66400	90300	97400	164000	106000	117000	96500	100000	104000	143000	94300	102000	120000	74500	93100	103000	119000	-	-
pme3200	74.1	57.1	73.1	C2H7N3	[M+H]+	1-Methylguanidine	Alkaloids	Alkaloids	471-29-4	3	605000	747000	575000	1040000	1070000	1380000	386000	348000	372000	579000	622000	401000	484000	508000	518000	836000	738000	648000	C02294	-
Wcgp008513	221	137	220	C13H16O3	[M+H]+	4-hydroxy-7-methoxy-2,6-dimethyl-3,4-dihydro-2H-naphthalen-1-one	Others	Others	-	2	49400	34200	34800	37100	40400	45200	31100	51200	30800	35200	36100	10300	37100	20500	20000	29400	23200	24500	-	-
Zblp006606	257	133	256	C16H16O3	[M+H]+	4-Hydroxy-2-methoxydihydrochalcone	Flavonoids	Chalcones	-	3	63800	162000	6860	16500	60300	747000	334000	11800	29600	3420	2230	2720	22600	85700	34900	111000	86200	94500	-	-
Zahp011689	205	149	204	C12H12O3	[M+H]+	2,2-dimethylchromene-6-carboxylic acid*	Others	Others	34818-56-9	1	2510000	4510000	3830000	4880000	4220000	3660000	4060000	4010000	4060000	4160000	4010000	2580000	3340000	5220000	4090000	4790000	4200000	3710000	-	-
Zmsp002526	302	137	301	C17H19NO4	[M+H]+	Haemanthamin	Alkaloids	Isoquinoline alkaloids	-	3	3480000	2100000	3060000	1030000	1880000	2760000	878000	991000	125000	1540000	597000	2030000	892000	807000	627000	1370000	1680000	1760000	-	-
Zmhn001793	341	179	342	C15H18O9	[M-H]-	6-O-Caffeoyl-D-glucose*	Phenolic acids	Phenolic acids	-	1	1780000	4170000	2410000	973000	1670000	1730000	4020000	2360000	1010000	5980000	6050000	7950000	5250000	7990000	5780000	3130000	4040000	3830000	-	-
Wbtp003421	437	275	436	C20H20O11	[M+H]+	1,6-dihydroxy-7-methoxy-5-{[(2s,3r,4s,5s,6r)-3,4,5-trihydroxy-6-(hydroxymethyl)oxan-2-yl]oxy}xanthen-9-one	Flavonoids	Other Flavonoids	-	2	84000	35500	77200	33000	14200	14400	13700	67100	23300	78400	8340	77100	17000	20100	23400	43300	38600	33300	-	-
Lmlp001436	183	165	182	C9H10O4	[M+H]+	Dihydrocaffeic acid	Phenolic acids	Phenolic acids	1078-61-1	2	341000	222000	201000	256000	388000	230000	176000	216000	305000	171000	147000	183000	214000	201000	163000	219000	209000	266000	C10447	ko00350
Wcsp002132	332	272	331	C18H21NO5	[M+H]+	tazettine*	Alkaloids	Alkaloids	-	1	1070000	826000	997000	1000000	998000	884000	1890000	9120000	6210000	1410000	1810000	1590000	1900000	1710000	1440000	2400000	2070000	1860000	-	-
Wbkp008793	701	539	700	C38H48N6O7	[M+H]+	(3S,3'S)-N,N'-((1R,2R)-4-((3,4,5-trihydroxy-6-methyltetrahydro-2H-pyran-2-yl)oxy)cyclohexane-1,2-diyl)bis(2-methyl-2,3,4,9-tetrahydro-1H-pyrido[3,4-b]indole-3-carboxamide)	Alkaloids	Alkaloids	-	2	71500	235000	245000	13800	22400	44900	6410	8680	28600	13300	14100	10200	32300	16100	15500	57900	47100	46000	-	-
Qmxp101615	349	179	348	C22H36O3	[M+H]+	Ent-3β-Acetoxyisopimar-15-8β-ol	Terpenoids	Ditepenoids	-	3	111000	84300	111000	43700	47100	31700	28300	25900	30100	30500	30400	27800	30100	27200	23200	49900	44900	38200	-	-
Lmmn000774	343	181	344	C15H20O9	[M-H]-	Dihydrocaffeoylglucose*	Phenolic acids	Phenolic acids	-	2	23200	17500	21300	43800	28600	19800	135000	163000	9120	42300	58500	48900	155000	163000	98700	50300	65600	58300	-	-
Wcdn001824	315	153	316	C13H16O9	[M-H]-	2-Hydroxy-5-[3,4,5-Trihydroxy-6-(Hydroxymethyl)Oxan-2-Yl]Oxybenzoic Acid	Others	Others	-	1	2450000	1220000	2430000	620000	560000	641000	1520000	1440000	1880000	1580000	603000	3140000	1130000	942000	878000	1090000	1300000	1420000	-	-
Lhmp113003	323	291	322	C20H22N2O2	[M+H]+	Akuammicine	Alkaloids	Plumerane	-	2	441000	711000	137000	493000	255000	1480000	1270000	94800	73500	128000	150000	59800	748000	424000	261000	470000	365000	393000	-	-
mws2208	195	177	194	C10H10O4	[M+H]+	Ferulic Acid	Phenolic acids	Phenolic acids	537-98-4	3	506000	141000	242000	544000	551000	1260000	239000	194000	45900	142000	93100	138000	281000	94200	75000	237000	256000	305000	C01494	ko00940,ko01100,ko01110
Hmsn001911	301	139	302	C13H18O8	[M-H]-	Idesin	Phenolic acids	Phenolic acids	20331-85-5	1	5150000	2670000	4580000	969000	1020000	886000	1530000	3290000	3690000	1810000	1080000	3840000	1700000	1390000	1400000	1810000	2160000	2370000	-	-
Lmyjn08217	489	407	490	C28H42O7	[M-H]-	Baimantuoluoline B	Others	Others	953390-35-7	1	22300	12400	32700	32000	5040	246000	19900	69000	13000	21200	18500	12600	14100	45500	32000	44100	38000	33800	-	-
Wcfp003475	325	191	324	C15H20N2O6	[M+H]+	6,7-dimethyl-4-(2,3,4,5-tetrahydroxypentyl)-1H-quinoxaline-2,3-dione*	Others	Others	-	1	304000	242000	344000	93000	115000	89600	0	0	0	87200	63600	184000	160000	158000	82100	131000	126000	161000	-	-
Lszp210010	325	191	324	C15H20N2O6	[M+H]+	Tatarine*	Alkaloids	Alkaloids	-	1	304000	242000	344000	93000	115000	89600	0	0	0	87200	63600	184000	160000	158000	82100	131000	126000	161000	-	-
Lmsn003297	449	287	450	C21H22O11	[M-H]-	3,4,2',4',6'-Pentahydroxychalcone-4'-O-glucoside	Flavonoids	Chalcones	-	3	18900	40000	30800	40100	43100	39300	32300	25300	43700	38800	39800	42300	43100	38500	35400	32800	43000	39200	C16408	ko00941,ko01110
Latp011219	149	121	148	C10H12O	[M+H]+	3,5-Dimethyl-2,3-dihydrobenzofuran	Others	Others	-	3	2710000	2190000	2360000	2750000	2020000	2000000	1940000	1950000	2040000	1830000	2110000	1680000	1720000	2280000	1600000	2450000	2050000	1890000	-	-
MWSCX015	165	91.1	164	C9H8O3	[M+H]+	Caffeic aldehyde	Phenolic acids	Phenolic acids	141632-15-7	3	728000	464000	594000	714000	806000	1770000	192000	201000	106000	293000	218000	157000	289000	101000	99800	394000	508000	420000	C10945	ko00940,ko01110
pmp000087	269	177	268	C13H16O6	[M+H]+	2-Feruloyl-sn-glycerol	Phenolic acids	Phenolic acids	-	3	314000	118000	226000	76900	93100	96200	72100	115000	57600	59700	34000	72500	110000	71200	56300	95800	104000	124000	-	-
mws0018	203	84.1	202	C10H26N4	[M+H]+	Spermine	Alkaloids	Alkaloids	71-44-3	3	32600	66700	51500	85400	107000	98400	98700	59700	88200	72300	85300	49700	68900	64100	79900	79900	99100	77800	C00750	ko00330,ko00410,ko00480,ko00770,ko01100,ko01240
pmn001690	327	165	328	C16H24O7	[M-H]-	3-Hydroxy-4-isopropylbenzylalcohol-3-O-glucoside	Phenolic acids	Phenolic acids	-	2	13800	17800	8640	33400	25200	64900	135000	216000	4520	8340	10200	3760	91100	76000	38300	46600	60500	58500	-	-
Lsjp211221	277	235	276	C17H24O3	[M+H]+	Buddledin A	Terpenoids	Sesquiterpenoids	-	2	5770000	5500000	5330000	5530000	5360000	5500000	5230000	5010000	4830000	6150000	5040000	5190000	4820000	4680000	4570000	6040000	4700000	4940000	-	-
Lshp011012	288	147	287	C16H17NO4	[M+H]+	11-Hydroxyvittatine*	Alkaloids	Pyridine alkaloids	-	1	0	0	0	6610000	8200000	7670000	7600000	6260000	5490000	5890000	4710000	7140000	5460000	5370000	6810000	5780000	4620000	4570000	C12194	-
MWSmce194	288	213	287	C17H21NO3	[M+H]+	Galanthamine; Galantamine; Lycoremin; Lycoremine; Jilkon	Alkaloids	Alkaloids	357-70-0	2	10700000	11100000	10600000	15600000	16500000	13900000	5820000	6750000	197000	4960000	6570000	5070000	6110000	5470000	6650000	10400000	8290000	8270000	C08526	ko00950,ko01110
pmb2654	460	118	461	C19H27NO12	[M-H]-	Anthranilate-1-O-Sophoroside	Phenolic acids	Phenolic acids	-	3	10600000	7190000	9630000	7200000	5510000	8090000	2550000	7960000	1970000	2960000	4580000	2290000	4500000	6770000	4710000	5500000	4170000	4800000	-	-
Lmrgn03360	327	165	328	C15H20O8	[M-H]-	Cryptamygin B	Phenolic acids	Phenolic acids	24696-05-7	2	23200	32100	10500	59500	31300	90400	215000	430000	15300	16400	19300	30900	146000	101000	60400	64100	81800	82800	-	-
Zmbp002538	205	146	204	C11H12N2O2	[M+H]+	1-Methoxy-indole-3-acetamide	Alkaloids	Plumerane	-	1	15600000	13400000	15700000	2720000	3600000	4180000	5540000	9880000	9100000	4970000	9670000	4330000	3140000	2880000	2780000	9310000	7080000	7910000	-	-
Yshs000041	459	295	460	C26H36O7	[M-H]-	Vibsanin J	Terpenoids	Ditepenoids	-	1	68100	89200	91900	95300	166000	74900	54000	24800	98100	23700	22700	23700	21000	22000	14800	62200	56000	47000	-	-
Wcdp006912	274	88.1	273	C16H35NO2	[M+H]+	Lauryldiethanolamine	Others	Others	1541-67-9	2	9840000	10000000	8740000	9110000	8780000	9690000	8020000	8560000	8890000	7900000	9390000	9260000	7920000	7270000	7150000	11600000	9980000	8830000	-	-
Lakn000379	665	383	666	C28H42O18	[M-H]-	2,5-Dihydroxyphenylacetate ethyl triglucoside	Phenolic acids	Phenolic acids	-	2	201000	259000	202000	989000	395000	383000	213000	466000	215000	271000	219000	264000	301000	276000	377000	296000	239000	315000	-	-
Wtmn002164	579	579	580	C27H32O14	[M-H]-	3,4-dimethoxy-2-[(3,4,5-trihydroxy-6-{[(3,4,5-trihydroxy-6-methyloxan-2-yl)oxy]methyl}oxan-2-yl)oxy]xanthen-9-one	Flavonoids	Other Flavonoids	-	2	695000	1040000	806000	1270000	1090000	1160000	1480000	284000	1170000	1740000	2160000	1430000	1360000	1720000	1560000	848000	1120000	1020000	-	-
Cmzn005251	433	271	434	C21H22O10	[M-H]-	6-O-Caffeoylarbutin	Phenolic acids	Phenolic acids	136172-60-6	3	121000	98400	94000	77600	88000	105000	81100	65200	56400	88700	86800	95500	74400	95600	100000	89200	92800	70800	-	-
mws1013	177	133	178	C9H6O4	[M-H]-	Esculetin (6,7-Dihydroxycoumarin)	Lignans and Coumarins	Coumarins	305-01-1	2	1930000	1560000	2320000	589000	421000	412000	1760000	2380000	1940000	1580000	907000	1660000	592000	513000	297000	969000	1280000	1120000	C09263	ko00999,ko01110
Wccp000991	290	147	289	C16H19NO4	[M+H]+	epi-zephyranthine*	Alkaloids	Alkaloids	-	1	5280000	4080000	4360000	753000	554000	615000	1280000	796000	1160000	1290000	1190000	1520000	110000	98100	95500	2500000	2030000	1920000	-	-
Qmjp081106	279	243	278	C15H18O5	[M+H]+	Chlorantholide E	Terpenoids	Sesquiterpenoids	1372558-36-5	2	43700	58100	52900	138000	191000	140000	218000	64300	126000	59400	53300	61900	134000	123000	146000	98100	90100	118000	-	-
MWStz084	288	147	287	C16H17NO4	[M+H]+	3'-Demethoxypiplartine*	Alkaloids	Pyridine alkaloids	130263-10-4	1	166000	103000	231000	8950000	1330000	2800000	2250000	8340000	7820000	7920000	7020000	9470000	7450000	7300000	9300000	7440000	5580000	6750000	C10444	-
Cmbn003996	429	193	430	C19H26O11	[M-H]-	Regaloside G	Phenolic acids	Phenolic acids	120601-64-1	2	128000	66900	92500	45400	41400	46200	40800	36800	35100	22400	26700	23500	36700	27300	20900	48900	48200	37500	-	-
MW0136698	163	89	162	C9H6O3	[M+H]+	6-Hydroxycoumarin*	Lignans and Coumarins	Coumarins	6093-68-1	2	1470000	2880000	1630000	3500000	2010000	1900000	4430000	2500000	1470000	8840000	7220000	11700000	7390000	9280000	16900000	3070000	3760000	4090000	-	-
Wchn003741	177	133	178	C10H10O3	[M-H]-	3,4-dihydroxy-3,4-dihydro-2h-naphthalen-1-one	Others	Others	-	2	382000	264000	386000	93900	68200	90500	305000	380000	326000	250000	165000	270000	91200	81300	58800	167000	213000	169000	-	-
Wccp002723	330	270	329	C18H19NO5	[M+H]+	Lycorine,1-O-acetyl-	Alkaloids	Alkaloids	-	2	264000	451000	158000	1700000	2260000	1960000	8380000	46400000	31600000	7280000	8480000	9460000	8700000	6270000	7240000	8320000	11100000	9380000	-	-
Wbmp010544	699	699	698	C37H50N2O11	[M+H]+	10-Hydroxymethyllycaconitine	Alkaloids	Alkaloids	-	1	10400000	24100000	28000000	1150000	1860000	1450000	827000	852000	3030000	657000	957000	543000	1840000	888000	591000	5170000	3860000	4440000	-	-
Wasn006585	447	315	448	C21H36O10	[M-H]-	Geranyl 3-O-xylopyranosyl-glucopyranoside*	Others	Others	-	2	172000	157000	124000	110000	24000	87000	13700	11900	132000	12100	20400	14200	4680	6240	3440	44200	56500	44400	-	-
MWSmce529	308	248	307	C14H13NO7	[M+H]+	Narciclasine*	Alkaloids	Isoquinoline alkaloids	29477-83-6	1	4490000	2730000	3650000	2960000	2580000	2270000	1820000	3830000	2440000	1760000	2140000	2440000	2740000	2150000	2080000	3030000	2460000	2310000	C08533	-
Wcgn012576	335	253	336	C20H32O4	[M-H]-	14-hydroxy-14-(hydroxymethyl)-5,9-dimethyltetracyclo[11.2.1.01,10.04,9]hexadecane-5-carboxylic acid	Terpenoids	Ditepenoids	-	3	227000	153000	204000	248000	180000	263000	170000	54800	75400	68700	65900	66100	67600	55400	35700	132000	160000	120000	-	-
Jmhp002020	434	255	433	C22H27NO8	[M+H]+	norcoclaurine-6-O-glucoside*	Alkaloids	Isoquinoline alkaloids	-	2	51300	36600	29300	399000	287000	372000	208000	140000	165000	201000	96800	252000	163000	184000	199000	153000	205000	172000	-	-
MWS2070	179	92	180	C10H12O3	[M-H]-	Propyl 4-hydroxybenzoate	Phenolic acids	Phenolic acids	94-13-3	3	10700	12600	11100	11500	13000	19800	13800	12500	12200	10400	13000	10200	9330	10800	9550	14700	11100	12100	-	-
Yamn004462	523	361	524	C26H36O11	[M-H]-	6-((4-(3-hydroxy-2-(4-(3-hydroxypropyl)-2-methylphenoxy)propoxy)-2-methoxyphenoxy)methyl)tetrahydro-2H-pyran-2,3,4,5-tetraol*	Lignans and Coumarins	Lignans	-	1	486000	548000	380000	162000	127000	369000	181000	484000	19900	146000	185000	108000	370000	188000	89500	236000	264000	315000	-	-
Lmmp004965	706	706	705	C39H63NO10	[M+H]+	β1-Solanine	Alkaloids	Steroid alkaloids	142287-76-1	2	2600000	2540000	2460000	616000	1820000	1050000	3400000	2080000	2030000	1740000	1680000	1750000	5230000	4050000	3550000	2710000	2650000	2050000	-	-
pme2459	449	287	448	C21H20O11	[M+H]+	Luteolin-7-O-glucoside (Cynaroside)	Flavonoids	Flavones	5373-11-05	3	82800	32600	90000	150000	195000	157000	66100	44000	37300	222000	51400	296000	54000	55300	67300	80600	104000	82400	C03951	ko00944
Lsjp211261	209	149	208	C13H20O2	[M+H]+	(6R,9S)-3-Oxo-α-ionol	Terpenoids	Monoterpenoids	-	3	400000	372000	529000	346000	449000	284000	154000	338000	91700	92500	243000	114000	563000	413000	244000	272000	203000	260000	-	-
pme1816	353	191	354	C16H18O9	[M-H]-	Neochlorogenic acid (5-O-Caffeoylquinic acid)*	Phenolic acids	Phenolic acids	906-33-2	2	13100	13300	9270	266000	562000	252000	7320	5960	12400	134000	369000	84900	110000	33600	84900	86200	116000	106000	C17147	-
Wbmp002299	450	288	449	C22H27NO9	[M+H]+	1-(4-((3,4,5-trihydroxy-6-(hydroxymethyl)tetrahydro-2H-pyran-2-yl)oxy)benzyl)-1,2,3,4-tetrahydroisoquinoline-5,6,7-triol	Alkaloids	Alkaloids	-	2	649000	271000	474000	43000	92700	122000	381000	345000	1050000	123000	187000	106000	346000	258000	135000	328000	267000	248000	-	-
Jmzn003632	521	329	522	C26H34O11	[M-H]-	Manglieside D	Lignans and Coumarins	Lignans	-	2	18100	17600	15100	16000	17000	38400	23200	5290	1740	6130	3140	9030	31000	14900	12400	16700	14100	19100	-	-
Zmsp001026	260	199	259	C15H17NO3	[M+H]+	Norsanguinine	Alkaloids	Alkaloids	164854-59-5	1	112000	77900	111000	234000	205000	193000	356000	138000	3860000	50400	55400	50000	84100	74500	58200	469000	436000	347000	C12253	-
pme1738	138	94.1	137	C7H9N2O	[M+H]+	3-Carbamyl-1-methylpyridinium;(1-Methylnicotinamide)	Alkaloids	Pyridine alkaloids	1005-24-9	3	607000	716000	584000	135000	247000	192000	585000	328000	597000	251000	324000	259000	184000	130000	199000	552000	430000	427000	C02918	ko00760,ko01100
Hmbp003234	255	163	254	C12H14O6	[M+H]+	1-O-Caffeoylglycerol	Phenolic acids	Phenolic acids	-	3	938000	1450000	1190000	1740000	2050000	2180000	1600000	775000	1080000	3930000	2460000	3320000	4360000	4420000	4610000	1720000	1740000	2230000	-	-
Lskp211395	387	207	386	C19H30O8	[M+H]+	Corchoionoside C*	Others	Others	-	1	52900	44500	66400	44000	25500	38300	197000	60600	69200	78400	77500	225000	59900	52900	28500	47300	56700	64600	-	-
HX1288	387	207	386	C19H30O8	[M+H]+	Citroside A*	Terpenoids	Terpene	120330-44-1	1	52900	44500	66400	44000	25500	38300	197000	60600	69200	78400	77500	225000	59900	52900	28500	47300	56700	64600	-	-
MWSHC20159	387	207	386	C19H30O8	[M+H]+	Roseoside*	Others	Ketone compounds	54835-70-0	1	52900	44500	66400	44000	25500	38300	197000	60600	69200	78400	77500	225000	59900	52900	28500	47300	56700	64600	-	-
pmb2871	315	153	316	C13H16O9	[M-H]-	1-O-Gentisoyl-β-D-glucoside*	Phenolic acids	Phenolic acids	23445-11-6	2	2230000	1660000	2100000	816000	747000	569000	1330000	1330000	1700000	1320000	521000	4420000	978000	829000	1370000	889000	1150000	1200000	-	-
pmn001367	315	153	316	C13H16O9	[M-H]-	Protocatechuic acid-4-O-glucoside*	Phenolic acids	Phenolic acids	-	2	2230000	1660000	2100000	816000	747000	569000	1330000	1330000	1700000	1320000	521000	4420000	978000	829000	1370000	889000	1150000	1200000	-	-
Lakn001671	329	123	330	C14H18O9	[M-H]-	2-β-D-Glucopyranosyloxy-5-hydroxy-phenylacetic acid	Phenolic acids	Phenolic acids	-	2	253000	135000	137000	38000	23100	52600	55000	109000	37900	58400	56900	76800	31000	22300	37700	45700	61000	60200	-	-
Zmtn001661	315	153	316	C14H20O8	[M-H]-	Vanilloloside	Phenolic acids	Phenolic acids	74950-96-2	2	260000	115000	192000	83200	107000	174000	94500	141000	284000	128000	35700	211000	149000	179000	113000	134000	176000	178000	-	-
MW0112724	353	97	516	C25H24O12	[M-H]-	Isochlorogenic acid A	Phenolic acids	Phenolic acids	2450-53-5	3	11900000	13400000	12400000	17600000	5040000	15500000	15000000	15700000	27100000	19800000	21800000	18800000	18700000	17900000	11700000	13000000	17600000	16800000	-	-
pme0066	116	74	117	C3H7N3O2	[M-H]-	Guanidinoacetate	Alkaloids	Alkaloids	352-97-6	3	32100	25000	32100	5020	6660	4430	11400	12800	14300	18700	11200	13000	6600	6200	9270	12900	10700	14700	C00581	ko00260,ko00330,ko01100
Jmhp002680	300	107	300	C18H22NO3+	[M]+	Norlotusine	Alkaloids	Isoquinoline alkaloids	-	1	69900	36900	36900	23300	21500	26200	28700	47600	83500	25700	17500	27600	18900	16100	20800	19100	25000	19400	-	-
MWSHC20175	313	151	314	C14H18O8	[M-H]-	Methylsalicylate-2-O-glucoside	Phenolic acids	Phenolic acids	10019-60-0	3	969	7950	3310	51600	44700	171000	91700	2560	1820	106000	10600	136000	4660	10300	3490	47000	48100	35700	-	-
Zmln000899	343	181	344	C15H20O9	[M-H]-	Syringaldehyde-4-O-glucoside	Phenolic acids	Phenolic acids	-	2	10600	15700	25400	40500	36300	48100	112000	166000	21600	36900	37700	76400	97900	203000	82600	57300	78100	73800	-	-
Zbfn002396	343	163	344	C15H20O9	[M-H]-	Caffeoyl-O-mannitol	Phenolic acids	Phenolic acids	-	2	5870	4610	12200	12100	5300	5980	78300	88900	8620	4740	8440	6250	21200	17100	6690	14500	19700	16500	-	-
Qmyp101232	225	95.1	224	C13H20O3	[M+H]+	Vomifoliol (Blumenol A)*	Terpenoids	Monoterpenoids	189351-15-3	2	70600	52300	20000	18300	37300	43100	64400	38800	45600	110000	59300	53700	30300	46800	13300	49400	53200	66300	C04166	-
Lahp002608	188	118	187	C11H9NO2	[M+H]+	3,5-Dihydro-2H-Furo[3,2-C]Quinolin-4-One*	Alkaloids	Quinoline alkaloids	-	1	7350000	6820000	7250000	1300000	1910000	1730000	2740000	4180000	3990000	2130000	4250000	2050000	1420000	1270000	1280000	4380000	3380000	3340000	-	-
Hmmp001310	188	118	187	C11H9NO2	[M+H]+	3-Indoleacrylic acid*	Alkaloids	Plumerane	1204-06-4	1	7350000	6820000	7250000	1300000	1910000	1730000	2740000	4180000	3990000	2130000	4250000	2050000	1420000	1270000	1280000	4380000	3380000	3340000	C21283	-
Lahp001956	188	118	187	C11H9O2N	[M+H]+	Pyran[3,4-b]indole-2-ketone	Alkaloids	Plumerane	-	3	7350000	6820000	7250000	1300000	1910000	1730000	2740000	4180000	3990000	2130000	4250000	2050000	1420000	1270000	1280000	4380000	3380000	3340000	-	-
Zmhn001036	433	271	434	C21H22O10	[M-H]-	Choerospondin	Flavonoids	Flavanones	81202-36-0	2	36200	19000	22000	26400	24400	26000	44400	27200	26000	52300	11200	45500	43200	25300	20000	23400	31300	31500	-	-
Hmtn001302	299	137	300	C13H16O8	[M-H]-	Glucosyloxybenzoic acid	Phenolic acids	Phenolic acids	-	1	761000	1460000	746000	1450000	1540000	2520000	190000	1600000	1620000	237000	1240000	504000	1840000	3470000	2160000	965000	1290000	1310000	-	-
Lacp004926	433	271	432	C21H20O10	[M+H]+	3,8-Dihydroxy-1-methoxy-9,10-anthraquinone glucoside	Quinones	Anthraquinone	-	2	36500	16400	41400	15100	7150	6130	24000	3750	5250	9870	21900	8820	9990	5260	13000	10000	7240	9020	-	-
Lmsn002247	299	137	300	C13H16O8	[M-H]-	1-O-Salicyloyl-β-D-glucose*	Phenolic acids	Phenolic acids	60517-74-0	1	1180000	618000	1110000	240000	302000	282000	102000	155000	242000	292000	133000	514000	360000	236000	160000	305000	403000	417000	-	-
Wcjp001060	284	152	283	C16H13NO4	[M+H]+	Asiaticumine A	Alkaloids	Alkaloids	-	1	6870000	9090000	8330000	6160000	11800000	13700000	3150000	4620000	2810000	8450000	13100000	8150000	14300000	19100000	19100000	7640000	5740000	7810000	-	-
MWSmce018	288	147	287	C16H17NO4	[M+H]+	Lycorine*	Alkaloids	Isoquinoline alkaloids	476-28-8	1	47300	71000	191000	7200000	7310000	1590000	6680000	5050000	4650000	6490000	5510000	5360000	4880000	4750000	6220000	5520000	4280000	4130000	C08532	ko00950
pmb3041	521	329	522	C23H22O14	[M-H]-	Tricin-7-O-saccharic acid	Flavonoids	Flavones	-	3	26200	18200	15800	33600	14100	33600	17900	11800	1940	2660	7340	6270	18700	21500	11200	13400	17600	13400	-	-
pme3005	74.1	46	73.1	C3H7NO	[M+H]+	N,N-Dimethylformamide	Alkaloids	Alkaloids	68-12-2	3	1160000	952000	808000	1330000	1040000	1300000	1110000	1000000	1220000	963000	972000	1160000	1140000	1170000	1230000	1180000	848000	1080000	C03134	-
Wayp003039	336	318	335	C15H29NO7	[M+H]+	N-(1-Deoxy-1-fructosyl)Aminononanoic acid	Alkaloids	Alkaloids	-	3	74300	49500	109000	186000	112000	151000	343000	369000	509000	195000	92400	286000	93100	93100	131000	209000	231000	165000	-	-
Zmcp102201	205	149	204	C12H12O3	[M+H]+	Senkyunolide B*	Others	Lactones	93236-67-0	1	39800000	41400000	45500000	46700000	38200000	49400000	34800000	48900000	44600000	41800000	36200000	38400000	46000000	48700000	40300000	38500000	49600000	53900000	C09921	-
Zmcp102202	205	149	204	C12H12O3	[M+H]+	Senkyunolide C*	Phenolic acids	Phenolic acids	-	1	39800000	41400000	45500000	46700000	38200000	49400000	34800000	48900000	44600000	41800000	36200000	38400000	46000000	48700000	40300000	38500000	49600000	53900000	-	-
pmp001162	415	245	414	C21H18O9	[M+H]+	Pinnatifinoside A	Flavonoids	Flavones	-	2	60400	59800	74900	14700	18300	9800	28700	25600	9750	24000	10800	46400	56200	73000	55300	36600	28100	27300	-	-
MWS3020	145	86.1	144	C7H16N2O	[M+H]+	N-Acetylcadaverine	Alkaloids	Alkaloids	32343-73-0	3	103000	182000	172000	204000	158000	148000	167000	182000	163000	151000	175000	154000	167000	162000	165000	191000	219000	155000	-	-
Hmqn004417	479	337	480	C26H40O8	[M-H]-	Pharboside A	Terpenoids	Ditepenoids	-	2	3120	3570	4880	3210	2720	2560	4210	3240	7300	4660	3530	4730	13000	10300	7510	6180	5180	4380	-	-
Lhyp112510	357	151	358	C20H22O6	[M-H]-	Menispermacide	Terpenoids	Ditepenoids	-	2	6730	16600	3960	5290	7940	31100	7770	5030	1150	21400	9890	38400	21800	9240	4360	18000	12700	16100	-	-
Wmzn000627	363	281	364	C22H36O4	[M-H]-	Ajugalaevigatic acid	Terpenoids	Ditepenoids	-	3	91900	83400	115000	147000	160000	173000	150000	59000	119000	50800	46100	41800	35200	31000	21700	74200	95200	105000	-	-
Wccp001153	290	147	289	C16H19NO4	[M+H]+	4a-Dehydroxycrinamabine*	Alkaloids	Alkaloids	-	1	5110000	4160000	4420000	680000	553000	614000	1280000	745000	1070000	1310000	1190000	1420000	114000	113000	108000	2650000	1990000	1970000	-	-
Saln000462	521	341	522	C25H30O12	[M-H]-	7-O-coumaroyl-loganic acid	Terpenoids	Monoterpenoids	-	3	239000	48100	120000	157000	61800	83700	146000	49400	36500	72600	8130	254000	112000	139000	75000	92200	76500	64900	-	-
Xmbn009362	239	195	240	C15H16N2O	[M-H]-	Arenarine B	Alkaloids	Alkaloids	-	2	26400	25700	31500	32100	28100	33900	66200	24500	28300	28000	29000	19300	24700	30400	24800	41000	32600	29200	-	-
Lmmn002260	551	389	552	C27H36O12	[M-H]-	5'-Methoxyisolariciresinol-9'-O-glucoside	Lignans and Coumarins	Lignans	-	3	195000	328000	193000	82600	56500	115000	93800	148000	30000	61200	63800	103000	159000	63200	43500	107000	97300	136000	-	-
Zmhn001358	299	137	300	C13H16O8	[M-H]-	4-O-Glucosyl-4-hydroxybenzoic acid*	Phenolic acids	Phenolic acids	-	1	1230000	609000	1040000	245000	305000	204000	176000	170000	185000	224000	150000	471000	292000	272000	153000	265000	373000	363000	-	-
MWS2066	143	115	144	C10H8O	[M-H]-	1-Naphthol*	Phenolic acids	Phenolic acids	90-15-3	3	39700	39900	41200	40700	44700	45100	39200	44300	51700	43100	44800	48900	46400	48800	41300	33900	48700	43400	C11714	-
Lacp001298	168	91.1	167	C9H13NO2	[M+H]+	4-Hydroxy-3-methoxy-β-phenethylamine	Alkaloids	Phenolamine	-	2	1970000	1560000	2200000	71200	63900	67800	47600	45600	40500	32800	29600	43900	65100	56400	48900	444000	350000	505000	-	-
Lalp004159	361	181	360	C16H24O9	[M+H]+	Plantarenaloside	Terpenoids	Monoterpenoids	72396-01-1	2	61400	59400	65000	110000	101000	302000	56500	42000	29400	0	0	0	82300	47300	45300	69900	101000	90400	-	-
Lmyn003971	521	359	522	C26H34O11	[M-H]-	Dihydrodehydrodiconiferyl alcohol-4-O-glucoside	Lignans and Coumarins	Lignans	-	2	32000	22400	24600	41400	34100	16300	6200	8520	3100	8730	33000	20000	10500	9300	7420	8530	6970	10100	-	-
Qmyp101438	211	135	210	C13H22O2	[M+H]+	Blumenol C	Terpenoids	Monoterpenoids	-	2	205000	108000	145000	8860	10000	30000	165000	243000	37900	34300	19000	73300	35600	19200	15600	101000	70800	82400	-	-
Lmzp004885	331	315	330	C17H14O7	[M+H]+	Tricin (5,7,4'-Trihydroxy-3',5'-dimethoxyflavone)	Flavonoids	Flavones	520-32-1	3	13000	15100	16400	13600	17300	17500	20700	10500	17200	13500	18100	12500	23600	19600	16900	13500	12500	9370	C10193	-
mws0017	146	72.1	145	C7H19N3	[M+H]+	Spermidine	Alkaloids	Alkaloids	124-20-9	3	221000	339000	331000	584000	239000	304000	147000	171000	187000	205000	190000	282000	220000	188000	151000	171000	214000	149000	C00315	ko00330,ko00410,ko00480,ko00940,ko01100,ko02010
mws1433	314	177	313	C18H19NO4	[M+H]+	N-Feruloyltyramine*	Alkaloids	Phenolamine	66648-43-9	3	45000	37400	43100	31300	31600	35900	24800	28600	29600	31100	28900	18500	21100	21800	22900	33700	26300	23800	C02717	-
Wcdp003705	561	399	560	C27H32N2O11	[M+H]+	mappiodoside C	Alkaloids	Alkaloids	-	2	82500	196000	65700	105000	51100	365000	213000	40700	28500	17800	58400	65200	169000	118000	81600	115000	153000	110000	-	-
Lacp004156	409	229	408	C20H24O9	[M+H]+	Phellodenol G*	Lignans and Coumarins	Coumarins	-	2	11700	124000	95100	125000	62000	72500	83600	145000	105000	62300	123000	98100	76000	50600	40200	81800	105000	73400	-	-
pme2268	138	94.1	137	C7H7NO2	[M+H]+	Trigonelline	Alkaloids	Pyridine alkaloids	535-83-1	1	609000	658000	548000	126000	229000	160000	556000	310000	612000	239000	334000	224000	181000	116000	199000	498000	373000	359000	C01004	ko00760
Wajp001786	368	206	367	C16H17NO9	[M+H]+	Xanthurenate-8-O-beta-D-glucoside	Alkaloids	Alkaloids	-	2	600000	319000	419000	185000	113000	178000	301000	61000	422000	465000	284000	579000	616000	610000	207000	292000	283000	392000	-	-
pmp000086	269	177	268	C13H16O6	[M+H]+	1-Feruloyl-sn-glycerol	Phenolic acids	Phenolic acids	-	3	79300	114000	108000	32200	80200	68000	28600	13500	19300	21900	27600	33300	20700	16000	9060	43600	48300	33000	-	-
Lmbn013410	205	189	206	C14H22O	[M-H]-	2,4-Di-Tert-Butylphenol*	Phenolic acids	Phenolic acids	96-76-4	1	1210000	1180000	1210000	1300000	1350000	1160000	1420000	1350000	1500000	1190000	1180000	1110000	1250000	1060000	1160000	1480000	1010000	1300000	-	-
Lmln010063	205	189	206	C14H22O	[M-H]-	2,6-Di-tert-butylphenol*	Phenolic acids	Phenolic acids	128-39-2	1	1210000	1180000	1210000	1300000	1350000	1160000	1420000	1350000	1500000	1190000	1180000	1110000	1250000	1060000	1160000	1480000	1010000	1300000	-	-
pmn001518	331	169	332	C13H16O10	[M-H]-	1-O-Galloyl-β-D-glucose	Phenolic acids	Phenolic acids	58511-73-2	3	46600	29400	47900	10500	8120	9760	16200	13600	6920	5480	12200	13200	9370	10100	7840	14800	17900	21600	C01158	ko00999
Zmcp102703	521	131	520	C26H32O11	[M+H]+	saikolignanoside D*	Lignans and Coumarins	Lignans	-	1	1520000	2680000	443000	1510000	1020000	6410000	2910000	293000	218000	420000	421000	359000	2350000	2090000	878000	1870000	1310000	1840000	-	-
Cmsp003083	521	131	520	C26H32O11	[M+H]+	Dehydrodiconiferyl alcohol-4-O-glucoside*	Lignans and Coumarins	Lignans	107870-88-2	1	1520000	2680000	443000	1510000	1020000	6410000	2910000	293000	218000	420000	421000	359000	2350000	2090000	878000	1870000	1310000	1840000	-	-
Hmdp000626	166	148	165	C9H11NO2	[M+H]+	Polygonatine A	Alkaloids	Alkaloids	-	3	345000	352000	330000	2060000	1100000	1520000	1840000	723000	322000	1890000	439000	1950000	1440000	1360000	912000	743000	1070000	845000	-	-
pmp000394	551	419	550	C26H30O13	[M+H]+	Naringenin-7-O-(2''-O-apiosyl)glucoside	Flavonoids	Flavanones	-	2	180000	177000	210000	370000	174000	169000	1120000	125000	102000	149000	5640	221000	106000	210000	63700	231000	157000	190000	-	-
mws2108	353	191	354	C16H18O9	[M-H]-	Cryptochlorogenic acid (4-O-Caffeoylquinic acid)*	Phenolic acids	Phenolic acids	905-99-7	2	24200	23200	30500	4150	5790	11700	12200	4510	16100	7260	14200	8160	9210	7610	14900	12000	17800	15200	-	-
Zmwp002109	278	260	277	C16H23NO3	[M+H]+	Latifoliumin B	Alkaloids	Alkaloids	-	3	288000	117000	121000	61200	60600	82800	25500	124000	78900	52800	41200	48900	59200	46300	21600	98000	67400	94900	-	-
Labp004779	538	175	537	C26H35NO11	[M+H]+	6,7-di-O-methyl-N-deacetylisoipecosidic acid	Alkaloids	Isoquinoline alkaloids	-	2	100000	137000	19300	165000	72900	906000	181000	36500	23300	29300	44300	23700	188000	119000	23900	93800	83000	121000	-	-
Lsmp121707	505	211	504	C24H40O11	[M+H]+	Cuneataside E*	Others	Others	-	3	45000	21700	41700	19100	56700	9850	8950	60000	1670	6670	7170	5600	18300	2730	8340	13300	9020	10800	-	-
HX1367	147	91.1	146	C9H6O2	[M+H]+	coumarin	Lignans and Coumarins	Coumarins	-	1	2160000	2320000	2500000	1180000	1130000	1000000	1360000	2690000	1740000	2790000	1660000	1920000	1390000	1260000	906000	2340000	1970000	1570000	-	-
Wbjp001317	203	130	202	C11H10N2O2	[M+H]+	vasicinone	Alkaloids	Alkaloids	486-64-6	1	6000000	4330000	4900000	1790000	1870000	1910000	2930000	3070000	3720000	3620000	2170000	3500000	2810000	2710000	2320000	3400000	2650000	2320000	-	-
MWSHC20125	335	135	336	C16H16O8	[M-H]-	5-O-Caffeoylshikimic acid	Phenolic acids	Phenolic acids	73263-62-4	2	26900	22400	18000	1200	801	6820	9190	2010	1200	2000	8000	1600	7190	19100	29500	9330	13900	11400	-	-
Hmgp002327	188	118	187	C11H9NO2	[M+H]+	3-amino-2-naphthoic acid*	Alkaloids	Alkaloids	-	1	7070000	6150000	6840000	1330000	1740000	1920000	2810000	4190000	3970000	2270000	3960000	2090000	1290000	1460000	1200000	4520000	3160000	3350000	-	-
Smcp001137	188	118	187	C11H9NO2	[M+H]+	naphthisoxazol A*	Alkaloids	Alkaloids	-	1	7070000	6150000	6840000	1330000	1740000	1920000	2810000	4190000	3970000	2270000	3960000	2090000	1290000	1460000	1200000	4520000	3160000	3350000	-	-
Jmwn002172	315	135	316	C14H20O8	[M-H]-	3,4-dihydroxyphenylethanol-β-D-glucopyranoside	Phenolic acids	Phenolic acids	-	3	3660	6920	4830	4560	3660	3530	7460	3590	16400	4650	3590	5490	6480	7750	5220	5140	4360	6480	-	-
Ymjm000116	313	151	314	C14H18O8	[M-H]-	6-O-Acetylarbutin	Phenolic acids	Phenolic acids	10338-88-2	1	15900	17500	16400	12500	19700	45400	34500	26400	11200	15600	20400	33900	19400	18800	5040	15100	21200	22500	-	-
Wcjp000906	274	199	273	C16H19NO3	[M+H]+	10-Norpluviine	Alkaloids	Alkaloids	-	1	4850000	3840000	4320000	2480000	2470000	2420000	2370000	2490000	4950000	3120000	2720000	3640000	5020000	4120000	3450000	4940000	3410000	3710000	-	-
Lcwp000595	265	119	264	C15H20O4	[M+H]+	9alpha-Hydroxy-11beta,13-Dihydrozaluzanin C*	Terpenoids	Sesquiterpenoids	-	3	270000	185000	206000	164000	108000	174000	164000	121000	83500	265000	84000	251000	139000	151000	81400	158000	143000	208000	-	-
mws0178	353	191	354	C16H18O9	[M-H]-	Chlorogenic acid (3-O-Caffeoylquinic acid)*	Phenolic acids	Phenolic acids	327-97-9	2	20100	7910	14300	236000	512000	274000	7060	7360	12200	142000	370000	76800	94300	38200	75400	85800	112000	130000	C00852	ko00940,ko00941,ko00945,ko01110
Lskp211262	363	137	362	C20H26O6	[M+H]+	Secoisolariciresinol	Lignans and Coumarins	Lignans	29388-59-8	1	939000	304000	701000	35000	2590	13300	8380	6450	3220	14800	20600	15000	23300	25100	9650	190000	173000	253000	C18167	ko00999,ko01100,ko01110
Lmcp006876	251	91.1	250	C17H14O2	[M+H]+	8-(Benzyloxy)-1-Naphthol	Others	Others	-	3	31100	25800	24000	29400	31700	30900	33500	31800	31700	22600	24800	26300	29100	25500	26200	34500	23100	26800	-	-
pmp001269	286	268	285	C18H39NO	[M+H]+	Hexadecyl ethanolamine	Alkaloids	Alkaloids	-	3	20000	52300	59200	39000	76100	136000	142000	70200	55800	78800	80100	106000	72200	67600	38800	246000	182000	170000	-	-
Lhhp120825	345	137	344	C16H24O8	[M+H]+	Multiflotriol glucoside*	Others	Others	-	2	38300	79400	98400	57000	53400	77800	35900	26200	7090	34700	26600	21800	87800	120000	43800	60000	60300	84600	-	-
mws1526	359	197	358	C16H22O9	[M+H]+	Sweroside	Terpenoids	Monoterpenoids	14215-86-2	2	32800	81100	33300	31100	126000	739000	373000	34300	16500	56800	53300	41800	45100	47800	78800	144000	138000	198000	C17071	-
Zbzp002804	307	177	306	C15H22N4O3	[M+H]+	N-Feruloylagmatine	Alkaloids	Phenolamine	-	2	65400	76700	65100	9800	16000	21200	55200	48900	46400	49800	48200	82800	30400	25000	13000	53400	35400	50700	C18325	ko00330,ko01100
pma0948	138	120	137	C8H11NO	[M+H]+	Phenylethanolamine	Alkaloids	Alkaloids	7568-93-6	3	77700	71400	87300	25800	62000	68600	52100	41200	44200	30500	42800	42000	71600	62900	46000	62200	75400	49400	C02735	-
Wccp003860	308	248	307	C14H13NO7	[M+H]+	Lycoricidinol*	Alkaloids	Alkaloids	-	1	3480000	2480000	2800000	2520000	2530000	1690000	1600000	3230000	2140000	1550000	1700000	2030000	2120000	1940000	2010000	3110000	2200000	2200000	-	-
Lskp211278	245	84	244	C10H16N2O5	[M+H]+	Oxypinnatanine A	Alkaloids	Alkaloids	-	2	196000	125000	79700	123000	152000	163000	524000	404000	151000	228000	87600	222000	368000	366000	226000	227000	247000	161000	-	-
MW0130123	363	311	304	C15H12O7	[M+CH3COO]-	Dihydroquercetin	Others	Ketone compounds	98006-93-0	3	123000	122000	141000	4580	5620	6530	4360	19000	20500	27900	41200	41000	37800	45100	38600	33600	49600	50200	-	-
Lmnp002845	463	343	462	C22H22O11	[M+H]+	Hispidulin-8-C-glucoside*	Flavonoids	Flavones	-	3	151000	86100	123000	28700	80000	37700	55800	15200	88400	41100	38700	46600	55300	38100	34100	48300	53500	71900	-	-
pma3724	369	177	368	C17H20O9	[M+H]+	1-O-Feruloylquinic acid	Phenolic acids	Phenolic acids	-	3	5010	3340	4940	88400	15400	14200	2940	10000	6670	9880	69800	13300	27800	24200	46900	26600	17100	23000	-	-
Zmsp002469	348	288	347	C19H25NO5	[M+H]+	O-Methyllycorenine N-oxide	Alkaloids	Plumerane	-	2	80900	96700	83400	1800000	417000	419000	286000	842000	833000	240000	136000	299000	249000	203000	351000	252000	391000	338000	-	-
Wagp001741	429	267	428	C19H28N2O9	[M+H]+	N-(gamma-L-glutamyl)tyramine O-glucoside	Alkaloids	Phenolamine	-	3	115000	81800	83700	24900	19100	23100	104000	26600	17600	13200	14200	10200	23000	16300	14700	20200	31500	27400	-	-
Wbtn002952	300	138	301	C13H19NO7	[M-H]-	1-(β-D-Glucopyranosyl)-3-ethyl-4-methyl-1H-pyrrole-2,5-dione	Others	Ketone compounds	-	3	62500	109000	58200	96700	120000	191000	16500	112000	120000	23000	101000	35500	116000	232000	140000	65500	93000	101000	-	-
Lsjp211202	225	123	224	C13H20O3	[M+H]+	Blumenol A	Terpenoids	Monoterpenoids	23526-45-6	2	65000	46500	38900	46400	42600	46400	43700	54300	52500	50400	25700	60900	36600	27400	26300	48200	31500	45700	-	-
Cmzn004594	449	287	450	C21H22O11	[M-H]-	Dunalianoside C*	Phenolic acids	Phenolic acids	-	3	126000	56100	90500	40600	18800	26300	46300	21200	44300	78400	27800	165000	73900	79200	52900	45200	46300	65400	-	-
Cmjn004337	401	269	402	C18H26O10	[M-H]-	Benzyl-(2''-O-xylosyl)glucoside	Phenolic acids	Phenolic acids	-	3	80900	50500	57600	110000	70900	66700	72200	97900	46700	35100	9610	61900	27400	20000	10800	69900	45200	64600	-	-
Jmgn004021	449	269	450	C21H22O11	[M-H]-	6-C-Glucosyl-2-Hydroxynaringenin	Flavonoids	Flavanones	-	3	34800	28700	26000	25500	13300	11700	29900	24700	25500	19000	14700	20000	21700	16400	36100	42200	34000	27200	-	-
pmp001230	279	121	278	C16H22O4	[M+H]+	Senkyunolide M	Others	Lactones	146986-60-9	1	1040000	1200000	1560000	1160000	1530000	1370000	1380000	878000	1180000	1340000	1030000	999000	1070000	1210000	1110000	1060000	1250000	797000	-	-
Qmzp101807	343	163	342	C20H22O5	[M+H]+	Avicennol*	Lignans and Coumarins	Coumarins	56110-68-0	1	965000	1100000	884000	690000	898000	1040000	991000	788000	804000	919000	826000	960000	863000	709000	683000	507000	777000	763000	-	-
pmb2975	477	357	478	C23H26O11	[M-H]-	Hesperetin-3'-O-glucuronide	Flavonoids	Flavanones	1237479-05-8	3	146000	117000	197000	37700	20900	30300	114000	294000	242000	127000	52000	151000	29400	24100	14900	48300	75800	59800	-	-
pmp001245	280	221	280	C15H22NO4+	[M]+	Feruloylcholine	Alkaloids	Phenolamine	85927-25-9	3	152000	143000	99500	159000	155000	182000	116000	109000	138000	166000	155000	176000	170000	217000	216000	203000	135000	147000	-	-
Zmsp000618	290	147	289	C16H19NO4	[M+H]+	Dihydrolycorine*	Alkaloids	Isoquinoline alkaloids	6271-21-2	1	1400000	1010000	1050000	172000	110000	126000	151000	100000	128000	191000	157000	232000	8980	14100	17200	561000	394000	377000	-	-
Lhzp111002	290	147	289	C16H19NO4	[M+H]+	Pseudolycorine*	Alkaloids	Isoquinoline alkaloids	29429-03-6	1	1320000	1060000	1170000	173000	108000	148000	177000	115000	136000	214000	175000	234000	16500	16400	24400	622000	424000	429000	C12187	-
Lshp011017	332	215	331	C19H25NO4	[M+H]+	O-Methyllycorenine	Alkaloids	Pyrrole alkaloids	-	3	1110000	1640000	1250000	458000	175000	218000	734000	1160000	96700	314000	475000	221000	23300	40000	46500	495000	313000	464000	C12241	-
Lhzp110914	348	165	347	C19H25NO5	[M+H]+	7-Methoxy-O-methyllycorenine	Alkaloids	Pyrrole alkaloids	-	3	46000	13700	45200	132000	74200	113000	28800	52000	44400	20900	15800	21600	0	0	0	47000	31000	48300	-	-
MW0007811	147	91.1	124	C7H8O2	[M+Na]+	3-Methoxyphenol	Phenolic acids	Phenolic acids	150-19-6	3	1610000	1710000	1650000	1010000	857000	527000	1160000	1280000	1210000	1660000	1470000	1860000	828000	931000	463000	948000	1330000	876000	-	-
Lshp011102	454	292	453	C20H23NO11	[M+H]+	7-Deoxynarciclasine glucoside	Alkaloids	Piperidine alkaloids	-	2	725000	335000	668000	316000	236000	481000	305000	334000	273000	197000	122000	338000	399000	508000	216000	367000	345000	232000	-	-
Lchn000012	537	327	538	C26H34O12	[M-H]-	Alangilignoside D	Others	Others	-	1	11200	5760	5320	8350	7190	22000	5010	5620	656	8300	5670	6330	12800	10300	9300	10300	7640	12300	-	-
Lmhp004270	209	79.1	208	C11H12O4	[M+H]+	Nigerapyrone E	Others	Ketone compounds	-	2	85100	34200	62900	33800	17200	40000	11700	34800	21600	9220	40300	20000	56600	37500	21100	35500	22900	35500	-	-
Lssp210087	359	137	358	C20H22O6	[M+H]+	Matairesinol	Lignans and Coumarins	Lignans	580-72-3	2	20000	83600	20300	46700	30900	258000	126000	28300	5980	12600	17300	22600	74600	49800	25700	33000	39300	51800	C10682	ko00999,ko01100,ko01110
Zmwp001893	306	288	305	C16H19NO5	[M+H]+	Crinamabine	Alkaloids	Isoquinoline alkaloids	-	2	3200000	2050000	16300000	2040000	1360000	1790000	971000	1260000	886000	414000	338000	661000	629000	612000	635000	2050000	1700000	1270000	-	-
Qmrp120309	399	269	398	C22H26N2O5	[M+H]+	Flavisiamine C	Alkaloids	Plumerane	-	2	95500	70700	109000	10000	34500	33500	813000	2720000	500000	23300	411000	135000	16100	10400	6670	198000	318000	255000	-	-
Lssp210280	423	261	422	C19H18O11	[M+H]+	1,5-dihydroxy ketone-6 murine O-β-D-glucoside	Others	Others	-	2	108000	84600	71700	26200	18300	30800	22900	94000	9820	14400	55000	27300	7200	31400	16400	30300	26700	41400	-	-
Yalp002838	207	91.1	206	C11H10O4	[M+H]+	4-Methoxy-5-(hydroxymethyl)-2H-1-benzopyran-2-one*	Lignans and Coumarins	Coumarins	-	2	0	0	0	30000	67700	31700	58400	54500	172000	203000	99300	245000	67700	54900	68100	109000	70100	78600	-	-
Cmsp002303	316	284	315	C18H21NO4	[M+H]+	Epicephalotaxine	Alkaloids	Isoquinoline alkaloids	39707-72-7	2	33600	18900	57800	1020000	222000	382000	1010000	379000	2300000	1150000	158000	1610000	45200	5790	5420	389000	563000	368000	-	-
HJN055	435	273	436	C21H24O10	[M-H]-	Dihydrocharcone-4'-O-glucoside	Flavonoids	Chalcones	-	3	33200	16900	31400	16900	19500	21700	13000	19900	20000	9370	3800	3580	0	0	0	15900	19200	11600	-	-
MWSHC2028	231	158	230	C13H14N2O2	[M+H]+	(1S,3S)-1-Methyl-1,2,3,4-tetrahydro-β-carboline-3-carboxylic acid	Alkaloids	Alkaloids	40678-46-4	2	54300	43300	56700	37700	57200	31800	42900	27600	25300	34600	55900	68400	29400	35800	29500	25300	38200	26000	-	-
Zbzp003134	197	151	196	C10H12O4	[M+Na]+	Jatamanin B	Terpenoids	Monoterpenoids	-	2	771000	635000	524000	380000	428000	551000	574000	733000	637000	655000	415000	822000	767000	535000	506000	568000	611000	373000	-	-
Wbkp004013	377	359	376	C20H24O7	[M+H]+	shinjudilactone	Terpenoids	Ditepenoids	80180-30-9	2	155000	185000	160000	46700	34300	48300	20600	107000	48800	46700	155000	22900	58800	33800	38600	61900	77800	101000	-	-
mws0921	149	131	150	C9H10O2	[M-H]-	p-Coumaryl alcohol	Phenolic acids	Phenolic acids	3690-05-09	3	18600	19000	22500	6590	14400	8280	21700	31000	27300	29500	12900	23500	7730	14900	8370	29100	17600	23200	C02646	ko00940,ko01100,ko01110
Labn004625	415	89	416	C19H28O10	[M-H]-	2-Phenylethyl beta-primeveroside	Phenolic acids	Phenolic acids	129932-48-5	2	30700	29400	38800	99700	94900	67800	68900	89600	42800	25500	33300	20600	19600	12200	6210	44500	51800	31100	-	-
Wafp004987	312	177	311	C18H17NO4	[M+H]+	N-Feruloylphenylacetamide	Alkaloids	Phenolamine	-	2	26100	44400	42500	21300	13600	53500	26300	26800	16700	39500	31900	40000	26600	43500	27000	36400	44000	26300	-	-
Lhzp110923	376	284	375	C20H25NO6	[M+H]+	3-O-Acetyl-narcissidine	Alkaloids	Pyrrole alkaloids	-	3	40000	21000	48600	12400	48600	12400	36700	27900	30000	85800	43300	104000	12400	18300	43300	33200	51300	35000	-	-
Lmbp002592	611	287	610	C27H30O16	[M+H]+	Kaempferol-3,7-O-diglucoside	Flavonoids	Flavonols	25615-14-9	3	29400	21300	28300	53400	18900	29900	12400	10900	13000	5450	5220	36700	16300	16700	16300	25100	15000	21200	-	-
MWSslk066	169	65	168	C8H8O4	[M+H]+	3-Hydroxy-4-methoxybenzoic acid; Isovanillic Acid	Phenolic acids	Phenolic acids	645-08-9	3	26800	39200	39600	28400	29100	38500	10500	38900	15400	21600	24900	19700	59300	71200	78800	36700	40400	24200	-	-
Wafp004334	476	177	475	C24H29NO9	[M+H]+	N-Feruloyltyramine 4'-glucoside	Alkaloids	Phenolamine	-	3	23300	50000	13000	30700	56700	24400	34300	29600	36700	27800	15400	71700	17300	21100	45600	20600	32300	34000	-	-
Lchp000218	209	121	208	C11H12O4	[M+H]+	(R)-3-ethyl-7-hydroxy-6-methoxyphthalide	Others	Others	-	2	294000	187000	306000	128000	92800	117000	28900	206000	41700	71700	220000	54400	162000	184000	142000	164000	119000	101000	-	-
Zmhn001446	579	417	580	C28H36O13	[M-H]-	Syringaresinol-4'-O-glucoside*	Lignans and Coumarins	Lignans	7374-79-0	3	3840	6730	5010	4080	4320	4990	9550	11600	69700	11700	9460	9670	14200	18300	7590	9540	8640	13700	C10890	-
Hahn002315	579	417	580	C28H36O13	[M-H]-	syringaresinol-4-O-β-D-glucopyranoside*	Others	Others	-	3	3840	6730	5010	4080	4320	4990	9550	11600	69700	11700	9460	9670	14200	18300	7590	9540	8640	13700	-	-
Lakn003294	343	181	344	C15H20O9	[M-H]-	2-β-D-Glucopyranosyloxy-5-hydroxyphenylacetic acidmethylester*	Phenolic acids	Phenolic acids	-	2	26300	29900	32500	26000	31300	48000	36600	78300	6190	27900	14700	44300	47800	40800	28700	27500	40900	26300	-	-
pmp000579	463	301	462	C22H22O11	[M+H]+	Diosmetin-7-O-galactoside*	Flavonoids	Flavones	-	3	34000	56400	27200	20200	8110	16600	69300	19000	9240	19300	10000	8990	15400	20700	21700	23800	15000	25500	-	-
Lmzp002365	465	303	464	C22H24O11	[M+H]+	Hesperetin-7-O-glucoside	Flavonoids	Flavanones	31712-49-9	3	376000	181000	284000	51000	70300	120000	133000	145000	103000	39900	60000	125000	124000	43800	91400	188000	117000	128000	C16422	ko00941
Zblp002750	181	121	180	C10H12O3	[M+H]+	Methyl-3-(3-hydroxyphenyl)Propionate	Phenolic acids	Phenolic acids	61389-68-2	3	377000	153000	382000	104000	33700	74900	41100	89900	70100	39800	18800	107000	67200	115000	53200	187000	119000	122000	-	-
MWSprf034	447	153	446	C19H26O12	[M+H]+	Gaultherin	Phenolic acids	Phenolic acids	490-67-5	1	127000	73600	250000	191000	178000	177000	177000	28500	73000	19500	5170	16100	54500	109000	130000	79400	90000	132000	-	-
MWSmce466	135	92	136	C8H8O2	[M-H]-	4-Hydroxyacetophenone	Phenolic acids	Phenolic acids	99-93-4	3	48600	48400	55400	44700	47700	48400	68800	48800	70500	55300	57000	60500	67900	57500	82400	60600	44600	34800	C10700	ko01100
Wagp000980	376	121	375	C16H25NO9	[M+H]+	2-[(4-hydroxyphenethyl)amino]ethane-1,1,2-triol O-Glucoside	Alkaloids	Alkaloids	-	2	36800	81300	73800	65800	82300	110000	223000	18900	8940	78600	25900	53100	269000	189000	239000	39000	67300	67600	-	-
pmn001378	519	357	520	C26H32O11	[M-H]-	Pinoresinol-4-O-glucoside*	Lignans and Coumarins	Lignans	41607-20-9	1	6230	2930	6720	52000	21600	46500	30700	5240	2200	14900	11300	20500	25800	34500	13100	17600	16900	9960	C17529	-
pmf0174	157	157	158	C10H22O	[M-H]-	1-Decanol*	Others	Alcohol compounds	112-30-1	3	755000	900000	887000	1360000	1030000	810000	801000	1100000	1210000	919000	1570000	844000	976000	891000	1420000	1360000	785000	1360000	C01633	-
pmb0382	339	177	338	C19H14O6	[M+H]+	O-Feruloyl 4-hydroxycoumarin	Lignans and Coumarins	Coumarins	-	3	25700	51600	23400	18600	30800	47900	51100	72000	12800	10000	31700	10000	21200	19200	14100	11700	16800	21100	-	-
Qmyp101114	371	209	370	C19H30O7	[M+H]+	9-O-β-D-Glucoside of 3-hydroxy-7,8-didehydro-β-ionol*	Terpenoids	Sesquiterpenoids	-	2	46400	6670	22600	13700	11700	17000	16700	38900	22100	13000	21800	26300	66600	44400	45800	46300	37500	25300	-	-
Lmmp003349	371	209	370	C19H30O7	[M+H]+	Byzantionoside A*	Others	Ketone compounds	189109-41-9	2	46400	6670	22600	13700	11700	17000	16700	38900	22100	13000	21800	26300	66600	44400	45800	46300	37500	25300	-	-
pmn001419	325	163	326	C15H18O8	[M-H]-	1-O-p-Coumaroyl-β-D-glucose*	Phenolic acids	Phenolic acids	7139-64-2	1	120000	74600	197000	16100	28400	23500	95500	25900	43400	47200	35600	94100	22100	29400	20200	86900	47300	72000	C16827	-
Zmhn002301	325	163	326	C15H18O8	[M-H]-	p-Coumaric acid-4-O-glucoside*	Phenolic acids	Phenolic acids	117405-48-8	1	120000	74600	197000	16100	28400	23500	95500	25900	43400	47200	35600	94100	22100	29400	20200	86900	47300	72000	C06739	-
MWSmce089	284	147	283	C17H17NO3	[M+H]+	p-Coumaroyltyramine*	Alkaloids	Phenolamine	36417-86-4	2	28000	49800	47900	3190	2020	54700	6180	5900	2240	4470	2840	13700	5140	6030	2490	20300	11300	14700	-	-
Lmbp003825	325	163	324	C15H16O8	[M+H]+	Skimmin (7-Hydroxycoumarin-7-O-glucoside)	Lignans and Coumarins	Coumarins	93-39-0	3	55200	68200	56200	11700	22400	61700	35000	40900	27800	34400	15500	15000	50500	41700	19200	13600	25000	22400	-	-
mws0982	126	68.1	125	C6H11N3	[M+H]+	1-Methylhistamine	Alkaloids	Alkaloids	501-75-7	3	129000	101000	98300	106000	99400	87900	94000	86300	85400	75700	88500	80100	79700	70800	75700	124000	88700	69000	C05127	ko00340,ko01100
zjgp122321	355	163	354	C16H18O9	[M+H]+	4-O-acetyl-3-O-caffeoyl-2-C-methyl-D-erythronate	Others	Others	-	3	34700	9690	2680	127000	177000	87700	17400	11100	25400	67600	73800	35500	74200	21700	30100	12900	21900	14300	-	-
Wcjp002598	146	91.1	145	C9H7NO	[M+H]+	8-hydroxyquinoline*	Alkaloids	Quinoline alkaloids	148-24-3	1	603000	572000	547000	80000	139000	143000	249000	311000	332000	166000	334000	145000	119000	93200	111000	388000	217000	274000	C19434	-
Qmkp093004	146	91.1	145	C9H7NO	[M+H]+	Indole-3-carboxaldehyde*	Alkaloids	Plumerane	487-89-8	1	603000	572000	547000	80000	139000	143000	249000	311000	332000	166000	334000	145000	119000	93200	111000	388000	217000	274000	C08493	-
Sayp010477	361	129	360	C21H28O5	[M+H]+	phanginin A	Terpenoids	Ditepenoids	-	2	190000	155000	212000	142000	140000	157000	170000	156000	128000	142000	118000	181000	168000	142000	202000	237000	140000	152000	-	-
Zmsp002860	197	151	196	C10H12O4	[M+H]+	Comolactone B	Others	Others	-	2	829000	691000	566000	266000	411000	515000	682000	880000	326000	558000	535000	821000	783000	620000	469000	465000	871000	671000	-	-
Labp003718	700	311	699	C32H45NO16	[M+H]+	Glucosyl-6,7-di-O-methyl-N-deacetylisoipecosidic acid	Alkaloids	Isoquinoline alkaloids	-	2	30000	39600	6670	56100	61700	131000	197000	8770	8570	6520	11900	15000	81200	52900	25700	44900	37600	23300	-	-
Hmhp004269	409	229	408	C20H24O9	[M+H]+	Nodakenin*	Lignans and Coumarins	Coumarins	495-31-8	2	123000	192000	113000	125000	98200	70700	101000	99600	115000	123000	103000	146000	61700	85800	32600	99000	123000	180000	C09279	-
pmn001421	337	191	338	C16H18O8	[M-H]-	3-O-p-Coumaroylquinic acid*	Phenolic acids	Phenolic acids	87099-71-6	2	10500	11300	5660	6980	13800	9520	6420	2830	5560	19200	21600	22200	8600	10800	7840	9860	5940	5950	-	-
Wcfn003424	337	191	338	C16H18O8	[M-H]-	Coumaroyl Quinic Acid*	Others	Others	-	2	10500	11300	5660	6980	13800	9520	6420	2830	5560	19200	21600	22200	8600	10800	7840	9860	5940	5950	-	-
zjbp111026	343	163	342	C20H22O5	[M+H]+	tetrahydrochromone M*	Others	Chromone	-	1	1090000	1100000	974000	849000	1240000	1210000	861000	1150000	889000	1000000	899000	654000	775000	786000	1120000	1110000	958000	572000	-	-
Wcop004851	177	117	176	C10H8O3	[M+H]+	5,6-dimethyl-2-benzofuran-1,3-dione	Terpenoids	Sesquiterpenoids	5999-20-2	3	1630000	1350000	1610000	396000	332000	406000	939000	997000	416000	1070000	644000	1770000	2080000	2270000	1520000	634000	1180000	835000	-	-
Lsjp211260	227	125	226	C13H22O3	[M+H]+	9-epi-Blumenol B	Terpenoids	Monoterpenoids	-	3	119000	65500	60300	55900	18300	54900	24900	64800	22000	26000	54200	11000	87500	63800	55800	47200	35000	65900	-	-
HX1361	177	89	176	C10H8O3	[M+H]+	7-Methoxycoumarin	Lignans and Coumarins	Coumarins	531-59-9	3	1040000	889000	848000	111000	67100	139000	387000	478000	248000	516000	281000	765000	809000	876000	518000	410000	612000	333000	C09268	-
Hmdp001676	300	282	299	C17H17NO4	[M+H]+	N-p-Coumaroyloctopamine	Alkaloids	Phenolamine	66648-45-1	2	0	0	0	417000	551000	448000	376000	109000	1640000	319000	145000	265000	429000	373000	296000	250000	489000	390000	-	-
pmn001583	609	300	610	C27H30O16	[M-H]-	Quercetin-3-O-robinobioside	Flavonoids	Flavonols	52525-35-6	3	2780	793	1980	7130	1600	1590	1590	3560	5040	15800	2330	11500	34400	27300	18600	9240	5930	5150	-	-
ZINC586482	149	106	150	C9H10O2	[M-H]-	4-Allylbenzene-1,2-diol	Phenolic acids	Phenolic acids	1126-61-0	3	75400	68100	96000	23700	14000	21600	79800	89600	71900	77000	45100	66100	28000	26200	13800	28700	46100	57900	-	-
MWSmce229	183	165	182	C9H10O4	[M+H]+	3,4-Dimethoxybenzoic acid; Veratric acid	Phenolic acids	Phenolic acids	93-07-2	2	261000	68300	86800	0	0	0	8850	5650	5640	11300	6350	14000	6420	6350	18300	25700	32800	49000	-	-
Sayp008963	235	133	234	C15H22O2	[M+H]+	phomophyllin H*	Terpenoids	Sesquiterpenoids	-	2	32100	32400	24200	30400	5680	32300	33400	40300	36700	18000	14800	24600	25800	10900	7460	36000	20500	21500	-	-
Lmmn002776	375	215	376	C20H24O7	[M-H]-	Cycloolivil	Lignans and Coumarins	Lignans	3064-05-09	2	101000	46900	49300	93300	84500	40300	85000	57600	41900	40700	47100	31700	53500	64500	37400	36600	68400	73000	-	-
Lajp006846	319	255	318	C20H30O3	[M+H]+	Imbricatusol D	Terpenoids	Ditepenoids	-	2	8840	6400	11300	13100	10600	14800	16200	18100	13100	15500	13200	10400	14900	7060	15500	8190	13500	7540	-	-
Wccp004073	330	239	329	C18H19NO5	[M+H]+	yemenine A	Alkaloids	Alkaloids	-	2	10400000	16500000	10500000	355000	253000	178000	244000	154000	70200	347000	308000	352000	96300	66400	112000	1670000	2690000	1460000	-	-
Lazn003564	597	375	598	C28H38O14	[M-H]-	Picraquassioside C	Lignans and Coumarins	Lignans	-	2	40200	121000	15500	27200	24900	216000	86200	9770	6400	17400	13500	11100	132000	51600	26800	44700	91900	73200	-	-
MWSmce675	271	108	272	C12H16O7	[M-H]-	Arbutin	Phenolic acids	Phenolic acids	497-76-7	3	726000	1310000	1170000	597000	2290000	2360000	906000	550000	1970000	2430000	925000	1250000	2300000	2480000	1210000	2110000	2090000	1040000	C06186	ko00010
Lhdp120312	373	135	372	C19H32O7	[M+H]+	3-Hydroxy-7,8-dehydro-ionol-9-O-β-D-glucopyranoside*	Terpenoids	Monoterpenoids	-	3	61200	35500	58700	13300	10700	18100	110000	369000	77800	18300	34900	5010	46300	76100	18000	50500	34100	71700	-	-
Lxmp122302	373	135	372	C19H32O7	[M+H]+	Dehydroxyampelopsisionoside*	Terpenoids	Sesquiterpenoids	-	3	61200	35500	58700	13300	10700	18100	110000	369000	77800	18300	34900	5010	46300	76100	18000	50500	34100	71700	-	-
Lmsp003939	625	317	624	C28H32O16	[M+H]+	Isorhamnetin-3-O-galactoide-7-O-rhamnoside*	Flavonoids	Flavonols	-	3	9580	5110	10300	10500	6330	8340	12800	23300	3850	80900	10900	26900	3340	11700	6410	21800	32100	15500	-	-
Lmsp004045	625	317	624	C28H32O16	[M+H]+	Isorhamnetin-3-O-glucoside-7-O-rhamnoside*	Flavonoids	Flavonols	17331-71-4	3	9580	5110	10300	10500	6330	8340	12800	23300	3850	80900	10900	26900	3340	11700	6410	21800	32100	15500	-	-
Lssp210086	373	137	372	C20H20O7	[M+H]+	Balanophonin B	Lignans and Coumarins	Lignans	92216-41-6	2	421000	355000	444000	46400	49600	56700	103000	156000	30000	88500	66100	64400	62300	31100	73400	187000	86300	178000	-	-
Zblp005777	314	177	313	C18H19NO4	[M+H]+	N-trans-ferulicacidacylp-hydroxyphenylethylamine*	Alkaloids	Phenolamine	-	3	41000	48500	18800	28300	28200	25700	23000	22700	24800	21000	17300	26000	25000	20700	20100	40000	20700	23600	-	-
Latp003004	395	233	394	C19H22O9	[M+H]+	2-Methyl-5-acetonyl-7-hydroxychromone glucoside	Others	Chromone	-	3	17500	39200	14700	105000	23300	18900	27800	45300	58800	108000	96600	63100	44500	42400	82100	88400	55600	43300	-	-
pma6640	479	317	478	C22H22O12	[M+H]+	3'-O-Methyltricetin-7-O-glucoside	Flavonoids	Flavones	-	3	145000	43100	14200	112000	127000	251000	0	0	0	59100	25100	75800	114000	98200	56700	32800	69500	72500	-	-
Lcsn000193	597	327	598	C28H38O14	[M-H]-	isatioxyneolignoside E	Lignans and Coumarins	Lignans	-	1	131000	399000	32300	104000	27500	404000	218000	40100	6410	26100	34500	29000	317000	91200	107000	125000	144000	63300	-	-
Zbjp004549	359	179	358	C16H22O9	[M+H]+	6-hydroxy-3-methoxy-5-vinyl-4,4a,5,6-tetrahydro-1H,3H-pyrano[3,4-c]pyran-1-one-O-xylose	Terpenoids	Monoterpenoids	-	3	503000	1780000	114000	4590000	8120000	14200000	3370000	2170000	37400	2990000	911000	2120000	2170000	933000	190000	3070000	5010000	2310000	-	-
HJAP018	523	319	522	C23H22O14	[M+H]+	Myricetin-3-O-(6''-acetyl)glucoside	Flavonoids	Flavonols	-	3	10900	25700	28600	2820	5020	10500	5010	11000	3970	8340	13200	9400	3340	19100	23100	25000	11000	16700	-	-
Lmmp002963	625	317	624	C28H32O16	[M+H]+	6-C-Methylquercetin-3-O-rutinoside	Flavonoids	Flavonols	-	3	10900	26700	16600	9190	11700	4490	5800	18300	3240	61600	10300	86600	1940	6670	5010	10900	24400	15500	-	-
MWSHY0094	459	139	458	C22H18O11	[M+H]+	Gallocatechin gallate	Flavonoids	Flavanols	4233-96-9	3	15100	16900	21000	28700	8340	28300	3290	28300	17800	1940	5010	9860	3190	8180	15300	7870	6570	14000	-	-
Lhhp120801	345	137	344	C16H24O8	[M+H]+	illicinolide A*	Terpenoids	Sesquiterpenoids	-	2	753000	234000	278000	46500	21700	499000	443000	401000	5010	130000	512000	135000	284000	16700	16700	187000	184000	364000	-	-
Smnp001863	449	287	448	C22H24O10	[M+H]+	8-O-methyl-7-hydroxyaloin	Quinones	Anthraquinone	-	2	60800	38300	56900	176000	160000	110000	219000	41400	35400	182000	56600	392000	63600	63600	32100	242000	114000	133000	-	-
Lmtn002324	431	269	432	C19H28O11	[M-H]-	Benzyl-(2''-O-glucosyl)glucoside*	Phenolic acids	Phenolic acids	-	3	15800	49600	85500	105000	107000	114000	123000	93900	111000	117000	37400	30200	65300	58400	115000	50300	108000	129000	C17564	-
MWSslk237	463	301	462	C22H22O11	[M+H]+	Hispidulin-7-O-glucoside(Homoplantaginin)*	Flavonoids	Flavones	17680-84-1	3	0	0	0	7850	8360	18700	37000	28300	15400	24700	14800	8840	20100	15600	12800	19900	10000	10000	C17762	-
Lagp004602	505	211	504	C24H40O11	[M+H]+	Foliasalacioside B1*	Terpenoids	Monoterpenoids	-	3	9560	18000	4380	8860	18500	6000	9580	26700	23800	1670	7190	7090	11700	14700	8720	8960	6670	15500	-	-
Lhdp120305	505	211	504	C24H40O11	[M+H]+	Guettardionoside*	Terpenoids	Monoterpenoids	-	3	9560	18000	4380	8860	18500	6000	9580	26700	23800	1670	7190	7090	11700	14700	8720	8960	6670	15500	-	-
Lhzp110920	286	268	285	C17H19NO3	[M+H]+	Narwedine	Alkaloids	Piperidine alkaloids	-	1	0	0	0	8050000	10800000	9040000	9170000	2830000	8810000	11900000	2040000	7250000	9850000	3300000	5950000	2830000	3250000	6160000	-	-
Wagp005869	459	211	458	C22H34O10	[M+H]+	3-Hydroxy-beta-ionol 3-(6''-Malonyl)Glucoside	Others	Others	-	1	114000	125000	125000	0	0	0	40300	263000	88300	212000	123000	231000	338000	401000	148000	104000	105000	214000	-	-
pmb0713	655	331	654	C29H34O17	[M+H]+	Tricin-7-O-(2''-O-glucosyl)glucoside	Flavonoids	Flavones	-	3	21400	51700	23300	22300	20100	13300	13300	3340	5010	12900	1720	5010	5010	9180	2620	11700	25000	12500	-	-
Wccp003625	266	208	265	C16H11NO3	[M+H]+	7H-Pyrrolo(3,2,1-de)phenanthridin-7-one,10-hydroxy-9-methoxy-	Alkaloids	Alkaloids	80787-57-1	2	45200	54000	51100	611000	1090000	522000	87000	198000	923000	219000	152000	181000	202000	270000	335000	256000	341000	123000	-	-
pmb0645	627	465	626	C28H34O16	[M+H]+	Hesperetin-6-C-glucoside-7-O-glucoside	Flavonoids	Flavonols	-	3	85100	65000	20600	39400	20000	33300	21400	10000	13300	37500	38200	18300	14900	38300	40200	59700	76200	26700	-	-
Lmsp004166	611	303	610	C27H30O16	[M+H]+	Quercetin-3-O-glucoside-7-O-rhamnoside*	Flavonoids	Flavonols	-	3	43300	13400	18300	27600	65000	55000	30900	22700	20300	25800	43300	10900	13500	13300	21300	20000	6670	16900	-	-
Lmjp002461	611	303	610	C27H30O16	[M+H]+	Quercetin-3-O-neohesperidoside*	Flavonoids	Flavonols	29662-79-1	3	43300	13400	18300	27600	65000	55000	30900	22700	20300	25800	43300	10900	13500	13300	21300	20000	6670	16900	-	-
pmb0711	611	303	610	C27H30O16	[M+H]+	Quercetin-7-O-rutinoside*	Flavonoids	Flavonols	147714-62-3	3	43300	13400	18300	27600	65000	55000	30900	22700	20300	25800	43300	10900	13500	13300	21300	20000	6670	16900	-	-
HJAP011	463	343	462	C22H22O11	[M+H]+	Chrysoeriol-8-C-glucoside (Scoparin)*	Flavonoids	Flavones	301-16-6	3	165000	85300	109000	37200	36100	41600	26400	33300	32600	46200	35100	29700	46100	56500	36100	53100	20600	62400	-	-
Wcop005243	311	251	310	C19H18O4	[M+H]+	2-(3-tert-butyl-2-hydroxyphenyl)-2-hydroxyindene-1,3-dione	Terpenoids	Sesquiterpenoids	71313-34-3	3	424000	770000	300000	103000	75400	918000	413000	67000	33000	77500	113000	82700	159000	74400	83400	136000	276000	118000	-	-
Lmmp003517	225	95.1	224	C13H20O3	[M+H]+	Solatuberenol A*	Others	Others	-	2	45100	51000	13300	37500	43800	34600	36800	47600	43400	47900	55100	23400	0	0	0	61200	33200	24000	-	-
Lmqp003432	227	121	226	C13H22O3	[M+H]+	6,9-Dihydroxy-7-megastigmen-3-one	Terpenoids	Sesquiterpenoids	-	3	43500	33700	35600	18300	42100	15000	15000	22700	23500	18400	20300	15000	14400	22900	11700	28300	52800	20400	-	-

## Sheet: Table S2
Table S2: Differentially Enriched Metabolites
Index	Q1 (Da)	Q3 (Da)	Molecular weight (Da)	Formula	Ionization model	Compounds	Class I	Class II	CAS	Level	ZJ-1	ZJ-2	ZJ-3	JX-1	JX-2	JX-3	HN-1	HN-2	HN-3	GX-1	GX-2	GX-3	SC-1	SC-2	SC-3	QC01	QC02	QC03	cpd_ID	kegg_map	GX_vs_HN_VIP	GX_vs_HN_P-value	GX_vs_HN_Fold_Change	GX_vs_HN_Log2FC	GX_vs_HN_Type	GX_vs_JX_VIP	GX_vs_JX_P-value	GX_vs_JX_Fold_Change	GX_vs_JX_Log2FC	GX_vs_JX_Type	GX_vs_ZJ_VIP	GX_vs_ZJ_P-value	GX_vs_ZJ_Fold_Change	GX_vs_ZJ_Log2FC	GX_vs_ZJ_Type	HN_vs_JX_VIP	HN_vs_JX_P-value	HN_vs_JX_Fold_Change	HN_vs_JX_Log2FC
Lmjp004702	183.07	137.06	182.058	C9H10O4	[M+H]+	2,4-Dihydroxy-6-methoxyacetophenone	Others	Ketone compounds	3602-54-8	2	153487	58010.7	63205	175312	186134	179358	131921	72023	15675.2	184046	68916.1	182955	62359.3	24271.7	6857.34	94067.3	94497.4	93870.3	-	-	-	-	-	-	-	-	-	-	-	-	-	-	-	-	-	1.05552	0.0845412	0.406098	-1.3001
Sadp004383	429.19	267.14	428.183	C24H28O7	[M+H]+	2-((7-hydroxy-3,8-dimethyl-4-vinyl-9,10-dihydrophenanthren-2-yl)oxy)-6-(hydroxymethyl)tetrahydro-2H-pyran-3,4,5-triol	Terpenoids	Ditepenoids	-	2	2.62608e+06	1173150	1722020	650842	489919	504793	631241	1.00592e+06	443088	428139	401411	583584	890643	588143	376277	860090	868046	862624	-	-	-	-	-	-	-	-	-	-	-	-	1.28307	0.0813045	0.255945	-1.9661	down	-	-	-	-
mws0677	219.11	160.08	218.106	C12H14N2O2	[M+H]+	N-Acetyl-5-hydroxytryptamine	Alkaloids	Plumerane	1210-83-9	3	366273	227644	378271	79305.2	90060.1	66151.4	96001.8	131091	135791	66147.5	116401	70771.4	59386.8	70589.2	59771.7	155230	156182	154350	C00978	ko00380,ko01100,ko01110	-	-	-	-	-	-	-	-	-	-	1.28334	0.0285136	0.260567	-1.94028	down	-	-	-	-
MWSmce340	203.12	132.09	202.111	C12H14N2O	[M+H]+	L-Praziquanamine	Alkaloids	Isoquinoline alkaloids	99746-73-3	3	168153	165260	155956	71271.9	74725.5	74310.1	126127	125873	161515	139545	172386	126131	90018.7	96430.8	75110.8	140392	140777	142277	-	-	-	-	-	-	-	-	-	-	-	-	-	-	-	-	-	-	-	-	-
Zbdn001947	301.09	123.01	302.1	C13H18O8	[M-H]-	Isotachioside	Phenolic acids	Phenolic acids	31427-08-4	3	90664.6	68813.2	93963.5	43976.4	29261.1	42548.9	45450.8	76444.7	23060.2	48782.6	35013.3	63807.3	51549.2	53288.3	37717.6	54663.4	54612	55343.8	-	-	-	-	-	-	-	-	-	-	-	-	-	-	-	-	-	-	-	-	-
Lmtn003096	523.22	361.14	524.226	C26H36O11	[M-H]-	Secoisolariciresinol 4-O-glucoside*	Lignans and Coumarins	Lignans	-	1	665768	553342	437758	231133	123725	422761	167869	450949	20509.7	140867	183238	188432	358985	190937	147836	271831	267279	271030	-	-	-	-	-	-	-	-	-	-	-	-	1.32418	0.023804	0.309341	-1.69273	down	-	-	-	-
Qmdp112410	337.27	263.24	336.266	C21H36O3	[M+H]+	Vitetrifolin H	Terpenoids	Ditepenoids	-	3	1.27026e+06	890736	998530	1.24329e+06	1.32556e+06	1.2296e+06	680196	250234	339569	289259	508726	266686	282307	197329	176855	792613	791833	804776	-	-	-	-	-	-	-	1.37392	0.00304021	0.280291	-1.835	down	1.25981	0.00963514	0.336972	-1.5693	down	1.38118	0.0190941	0.334346	-1.58059
MWStz040	116.07	70.07	115.063	C5H9NO2	[M+H]+	Pterolactam*	Alkaloids	Pyrrole alkaloids	38072-88-7	1	8382395	8.94635e+06	8.39658e+06	3.28368e+06	5.61063e+06	6.52714e+06	5.78872e+06	6.84446e+06	7.23071e+06	4.74039e+06	1.0429e+07	3.93644e+06	4.22407e+06	4.19149e+06	4.15743e+06	7.61501e+06	7.55936e+06	7.46275e+06	-	-	-	-	-	-	-	-	-	-	-	-	-	-	-	-	-	-	-	-	-
Zaxn005611	315.2	315.2	316.24	C21H32O2	[M-H]-	Methyl abieta	Terpenoids	Ditepenoids	-	2	136793	118742	163941	93427.9	75564	96619.9	134955	145384	238349	176160	131687	207308	479542	444518	327796	185025	189655	188061	-	-	-	-	-	-	-	-	-	-	-	-	-	-	-	-	-	-	-	-	-
Hmcp009963	180.14	123.07	180.138	C11H18NO+	[M]+	Candicine	Alkaloids	Phenolamine	6656-13-9	1	2.14688e+06	2.63848e+06	1.41058e+06	2.40865e+06	1.8355e+06	3.521e+06	4.16081e+06	3.32955e+06	3.50986e+06	1.84524e+06	2.29137e+06	1.66153e+06	1.37757e+06	1.31248e+06	1.04908e+06	2.23494e+06	2.18986e+06	2.18229e+06	C10575	-	-	-	-	-	-	-	-	-	-	-	-	-	-	-	-	-	-	-	-
MEDP1785	181.05	137.1	182.058	C9H10O4	[M-H]-	Methyl vanillate	Phenolic acids	Phenolic acids	3943-74-6	3	43283.1	56086.8	68440.6	28450.9	30267.3	23926	35297.4	54621.3	37516.4	41287.6	47957.9	42820.5	15005	24369.6	30532	29664.8	29801.7	29075.8	-	-	-	-	-	-	-	-	-	-	-	-	-	-	-	-	-	-	-	-	-
Zmsp001102	272.13	240.1	271.121	C16H17NO3	[M+H]+	Crinine	Alkaloids	Isoquinoline alkaloids	-	1	4.12933e+06	3.4252e+06	3.58984e+06	554784	418648	450578	976939	603091	845996	1.06564e+06	929202	1.23684e+06	92540.2	62182.1	76675.1	1.5719e+06	1.60428e+06	1.61194e+06	-	-	-	-	-	-	-	1.38254	0.0103896	2.26943	1.18233	up	1.35077	0.00237694	0.289984	-1.78596	down	-	-	-	-
MWSHY0098	307.08	139.04	306.074	C15H14O7	[M+H]+	Epigallocatechin	Flavonoids	Flavanols	970-74-1	3	364430	327377	393430	168751	162146	144506	160382	439590	591606	99692.3	163506	145851	105987	99546.8	44656.2	219333	221191	215420	C12136	ko00941,ko01110	1.31695	0.172265	0.343283	-1.54253	down	-	-	-	-	-	1.30025	0.0011207	0.376922	-1.40766	down	1.07635	0.198898	2.50646	1.32565
Zmwp001345	292.15	230.12	291.147	C16H21NO4	[M+H]+	Latifoliumin D	Alkaloids	Isoquinoline alkaloids	-	3	742718	660913	520851	138752	124943	131042	349673	99470.1	175661	331635	305636	445950	42372.4	52157.7	39747.4	422422	412355	412108	-	-	-	-	-	-	-	1.40299	0.0325623	2.74416	1.45636	up	-	-	-	-	-	-	-	-	-
Lacp002450	316.16	284.13	315.147	C18H21NO4	[M+H]+	Erythratine	Alkaloids	Pyrrole alkaloids	-	2	9.0786e+07	6.22013e+07	8.62088e+07	4.01944e+06	1.67401e+06	4.13048e+06	1.41575e+07	1.84009e+07	5.88854e+06	3.45994e+06	2.39465e+06	4.54568e+06	506421	198964	372888	2.61018e+07	2.67829e+07	2.67885e+07	-	-	1.49416	0.122138	0.27051	-1.88625	down	-	-	-	-	-	1.35329	0.0129159	0.0434801	-4.5235	down	1.28597	0.11577	3.9136	1.9685
Wasn006047	431.23	251.17	432.236	C21H36O9	[M-H]-	Glucosyl 10,11-dihydroxy-2,6-farneSadienoate	Others	Others	-	2	254433	159166	250011	69774.3	49063.1	59183.4	108361	175023	99267.8	85915.1	39708.9	109030	98875.2	81669.2	50534.6	104109	100974	102732	-	-	-	-	-	-	-	-	-	-	-	-	1.17342	0.0240018	0.353602	-1.4998	down	1.35968	0.0960238	2.14948	1.10399
Zmsp002795	334.13	302.13	333.121	C17H19NO6	[M+H]+	8-Demethoxyhostasine	Alkaloids	Plumerane	-	2	2.66759e+07	2.33072e+07	2.83101e+07	1.36266e+07	9.72831e+06	1.19314e+07	641876	759185	466037	24374.5	1.73155e+06	77097.3	68027.5	70181.9	21675	9.61798e+06	9.50964e+06	9.32291e+06	-	-	-	-	-	-	-	1.23834	0.00333317	0.0519471	-4.26681	down	1.21706	0.00118543	0.0234122	-5.41659	down	1.52638	0.00978995	0.0529128	-4.24024
Lchp000221	207.06	91.05	206.058	C11H10O4	[M+H]+	(Z)-3-Ethylidene-7-hydroxy-6-methoxyphthalide*	Others	Others	-	2	225191	198898	229613	79005.9	85928.8	72666.3	132759	145694	168553	112629	171854	90018.7	106642	100966	76022.5	145228	140767	143982	-	-	-	-	-	-	-	-	-	-	-	-	-	-	-	-	-	-	-	-	-
Wccp002868	286.11	229.09	285.1	C16H15NO4	[M+H]+	5,7,20,21-tetraoxa-14-azahexacyclo[16.2.1.02,10.04,8.011,15.011,19]henicosa-2,4(8),9,14-tetraene	Alkaloids	Alkaloids	-	2	1.63493e+06	2.38734e+06	1.74243e+06	1.70088e+07	2.28793e+07	1.80267e+07	2.63945e+06	1.74689e+06	327448	6.32435e+06	5.78907e+06	5.70943e+06	1.02706e+07	1.07441e+07	1.41368e+07	6.73408e+06	6.63273e+06	6.85045e+06	-	-	1.38024	0.016866	3.781	1.91877	up	1.42387	0.0169889	0.307742	-1.70021	down	1.33809	0.000236213	3.09172	1.62841	up	1.39107	0.00515615	0.0813917	-3.61897
Wccp004133	374.16	254.12	373.152	C20H23NO6	[M+H]+	[(1S,13S,15R,18R)-15-hydroxy-5,7-dioxa-12-azapentacyclo[10.5.2.01,13.02,10.04,8]nonadeca-2,4(8),9,16-tetraen-18-yl](3S)-3-hydroxybutanoate	Alkaloids	Alkaloids	-	1	623813	476334	561166	824113	817563	867182	3.187e+06	2.94336e+07	3.22612e+06	9.19577e+06	1.51304e+06	7.97835e+06	2.07714e+07	1.55461e+07	1.86913e+07	7.33617e+06	7.10517e+06	7.15008e+06	-	-	-	-	-	-	-	1.19278	0.152072	7.44847	2.89694	up	1.18902	0.140225	11.2484	3.49165	up	1.27029	0.33152	14.2881	3.83674
Wcsn009782	251.2	251.21	252.209	C16H28O2	[M-H]-	(E)-12-hydroxy-2,6,10-trimethyltrideca-2,5-dien-4-one	Others	Others	-	2	125114	110773	130873	122585	147400	141695	85857	72752.5	43567.5	58197.6	54876.7	36976.8	58354.3	39401	43548.9	100417	102023	98562	-	-	-	-	-	-	-	1.38248	0.00102056	0.364486	-1.45607	down	1.2848	0.0013023	0.409126	-1.28938	down	1.32808	0.0141141	0.491103	-1.0259
Zmgn004894	151.04	136.02	152.047	C8H8O3	[M-H]-	Methyl 4-hydroxybenzoate*	Phenolic acids	Phenolic acids	99-76-3	3	136579	129741	139858	79434.6	71752.1	82674	74895.1	81590.3	95620.8	55196.4	59417.6	51542.1	113230	119945	109228	92864.3	95058.5	91906.5	-	-	-	-	-	-	-	-	-	-	-	-	1.35221	4.79864e-05	0.409072	-1.28957	down	-	-	-	-
mws0458	151.04	136.02	152.047	C8H8O3	[M-H]-	Vanillin; 4-Hydroxy-3-Methoxybenzaldehyde*	Others	Aldehyde compounds	121-33-5	3	136579	129741	139858	79434.6	71752.1	82674	74895.1	81590.3	95620.8	55196.4	59417.6	51542.1	113230	119945	109228	92864.3	95058.5	91906.5	C00755	ko00996,ko01100,ko01110	-	-	-	-	-	-	-	-	-	-	1.35221	4.79864e-05	0.409072	-1.28957	down	-	-	-	-
Lhzp110921	272.13	136.07	271.121	C16H17NO3	[M+H]+	Vittatine	Alkaloids	Pyrrole alkaloids	-	2	4.61063e+06	8.56327e+06	6.10555e+06	1.46992e+07	1.8444e+07	1.52859e+07	7.17723e+06	8.59157e+06	6.58855e+06	3.01871e+06	5.96707e+06	3.32446e+06	6.38765e+06	8.16235e+06	1.11338e+07	8.12134e+06	7.90787e+06	7.84807e+06	-	-	-	-	-	-	-	1.36958	0.001547	0.254191	-1.97602	down	-	-	-	-	-	1.48019	0.00707562	0.46165	-1.11513
Wbsp001941	276.19	215.14	275.188	C17H25NO2	[M+H]+	Obscurumine E	Alkaloids	Alkaloids	-	2	4.34618e+07	3.39391e+07	3.7322e+07	4.89012e+07	6.31136e+07	5.70859e+07	6.3789e+07	2.41017e+07	7.11322e+06	1.33063e+07	1.66333e+07	1.40473e+07	1.16271e+07	1.53895e+07	1.58981e+07	2.91295e+07	2.9276e+07	3.01172e+07	-	-	-	-	-	-	-	1.4263	0.00692293	0.260123	-1.94274	down	1.33703	0.00761237	0.383419	-1.38301	down	-	-	-	-
Wcsn011122	279.23	279.24	280.24	C18H32O2	[M-H]-	(5Z,10E,14S)-14-hydroxy-2,6,10-trimethylpentadeca-5,10-dien-4-one	Others	Others	-	1	8.28255e+06	7.38066e+06	7.40326e+06	10586812	1.35775e+07	1.13886e+07	6.79314e+06	4.08265e+06	6.83999e+06	3.42762e+06	4.35593e+06	3.59372e+06	2.75218e+06	1.9633e+06	1.79484e+06	6.60586e+06	6.36122e+06	6.44319e+06	-	-	-	-	-	-	-	1.41675	0.00735789	0.320009	-1.64381	down	1.3272	0.000703034	0.493239	-1.01964	down	1.37706	0.00961386	0.498293	-1.00493
Lmyn000160	237.06	87.01	238.069	C8H14O8	[M-H]-	Mucic acid Dimethyl Ester	Phenolic acids	Phenolic acids	-	1	856605	1.02088e+06	832832	1.72036e+06	1.57328e+06	1.84394e+06	1.05959e+06	584407	571695	1.63527e+06	926801	1.55016e+06	3.07226e+06	2.74686e+06	2.60879e+06	1.57624e+06	1.5392e+06	1.60572e+06	-	-	-	-	-	-	-	-	-	-	-	-	-	-	-	-	-	1.39213	0.0132356	0.431272	-1.21333
Wcjp002512	286.14	229.08	285.137	C17H19NO3	[M+H]+	2-Methyl-4-(4-hydroxyphenyl)-6-methoxy-7-hydroxy-1,2,3,4-tetrahydroisoquinoline	Alkaloids	Alkaloids	-	1	1.8134e+06	2.62038e+06	1.95855e+06	1.81044e+07	2.25702e+07	1.80585e+07	2.83584e+06	1.86364e+06	294739	6.07559e+06	6.80893e+06	5.32576e+06	1.12569e+07	1.04156e+07	13847235	6.94772e+06	7.22471e+06	6.9847e+06	-	-	1.33315	0.0120428	3.64627	1.86642	up	1.41929	0.00804001	0.310051	-1.68942	down	1.32973	0.00323039	2.84877	1.51034	up	1.37019	0.00193975	0.0850325	-3.55584
Zmwp003237	320.15	260.13	319.142	C17H21NO5	[M+H]+	Deacetylbowdensine	Alkaloids	Isoquinoline alkaloids	-	3	403939	403606	579622	421766	361691	377677	1.99255e+06	2.9904e+06	1.27713e+06	183414	1.40521e+06	247863	96803.8	73355	29018.5	711344	697969	728472	C12169	-	1.3494	0.0844557	0.293364	-1.76924	down	-	-	-	-	-	-	-	-	-	-	1.47899	0.0756591	5.39135	2.43065
Lskp211279	229.12	142.09	228.111	C10H16N2O4	[M+H]+	Longitubanine A	Alkaloids	Alkaloids	-	2	2.67383e+07	2.51732e+07	2.04219e+07	8.23934e+06	8.97378e+06	8.41503e+06	9.13868e+06	7.89322e+06	1.3164e+07	1.27357e+07	8.08341e+06	1.67369e+07	9.59205e+06	8.9805e+06	7.17193e+06	1.58873e+07	1.52113e+07	1.55504e+07	-	-	-	-	-	-	-	-	-	-	-	-	-	-	-	-	-	-	-	-	-
Lmgp002501	474.16	312.11	473.153	C20H27NO12	[M+H]+	Dhurrin-6'-O-Glucoside	Alkaloids	Phenolamine	-	2	2.35737e+06	922980	1.65924e+06	272624	146940	260969	266124	430406	397176	303856	204340	517087	1.83475e+06	2.38767e+06	1.07341e+06	751245	784364	774344	-	-	-	-	-	-	-	-	-	-	-	-	1.2424	0.0812583	0.207564	-2.26837	down	-	-	-	-
Wbmp006300	412.25	412.25	411.241	C25H33NO4	[M+H]+	1,2,9,10-tetraethoxy-6-methyl-5,6,6a,7-tetrahydro-4H-dibenzo[de,g]quinoline	Alkaloids	Alkaloids	-	2	2.34226e+07	1.52709e+07	2.2047e+07	1.69889e+06	1.18771e+06	1.59665e+06	6.82768e+06	2.76227e+06	1.54006e+06	459380	526682	712714	1.67281e+06	1.32325e+06	927132	4.999e+06	5.10158e+06	5.22968e+06	-	-	1.569	0.187814	0.15263	-2.71189	down	1.37363	0.0140389	0.378916	-1.40005	down	1.35809	0.0159282	0.0279678	-5.16009	down	-	-	-	-
pme2828	140.03	98.96	139.027	C6H5NO3	[M+H]+	4-Nitrophenol	Phenolic acids	Phenolic acids	100-02-7	3	1.19578e+07	9.40478e+06	9.49664e+06	1.33956e+07	7.55666e+06	1.06762e+07	6.06481e+06	5.73531e+06	1.35145e+06	9.5845e+06	4.83344e+06	6.53647e+06	9.77929e+06	9.6559e+06	6.21e+06	8.48331e+06	8.23112e+06	8.10376e+06	C00870	-	-	-	-	-	-	-	-	-	-	-	-	-	-	-	-	1.07786	0.0539951	0.415815	-1.26599
Zmsp003381	360.15	268.1	359.137	C19H21NO6	[M+H]+	Ungminorine*	Alkaloids	Isoquinoline alkaloids	102487-18-3	1	776613	459898	1.01634e+06	2.11438e+07	1.17926e+07	1.64143e+07	1.10206e+06	815221	7.20453e+06	9.99343e+07	5.24246e+06	1.37061e+08	549106	570694	469302	2.23151e+07	2.17464e+07	2.1282e+07	-	-	1.37991	0.185915	26.556	4.73096	up	-	-	-	-	-	1.19572	0.178372	107.525	6.74853	up	1.30294	0.0192291	0.184837	-2.43568
MWSmce364	197.08	151.07	196.074	C10H12O4	[M+H]+	Xanthoxylin*	Phenolic acids	Phenolic acids	90-24-4	1	324905	81554.5	211167	6.69798e+06	8.83884e+06	2.09975e+07	1.5091e+06	279730	116939	1.00503e+07	1.02154e+06	1.19353e+07	3.01811e+06	513667	71492.8	4172514	4.20679e+06	4.02156e+06	C10726	-	1.34331	0.169981	12.0724	3.59364	up	-	-	-	-	-	1.18595	0.156987	37.2509	5.2192	up	1.37553	0.120772	0.0521638	-4.26081
mws0055	373.13	343.09	372.121	C20H20O7	[M+H]+	Tangeretin (4',5,6,7,8-Pentamethoxyflavone)	Flavonoids	Flavones	481-53-8	3	265241	128682	336081	42465.7	39828.8	35967.6	68187.1	33732.5	38318.1	20181.2	28645.8	31494.1	57194.3	45457.8	42215.4	77540.7	78231.7	74764.1	C10190	-	-	-	-	-	-	-	-	-	-	-	1.31193	0.0702694	0.110028	-3.18405	down	-	-	-	-
pmb0782	86.1	69.07	85.0891	C5H11N	[M+H]+	Piperidine	Alkaloids	Piperidine alkaloids	110-89-4	3	4.25025e+06	4.87782e+06	5.12647e+06	2.03889e+06	2.3984e+06	2.81201e+06	4.00948e+06	4.1563e+06	3.47749e+06	3.0564e+06	4.00031e+06	2.381e+06	2.07577e+06	2.06777e+06	1.73988e+06	3.7368e+06	3.77253e+06	3.60061e+06	C01746	ko00960	-	-	-	-	-	-	-	-	-	-	-	-	-	-	-	-	-	-	-
Wcgn012055	333.2	251.2	334.214	C20H30O4	[M-H]-	Araucarolone*	Terpenoids	Ditepenoids	-	3	88121.1	77555.8	80129	101101	129800	114870	38745.1	25722.5	33066.1	24155.7	47194.6	30182.2	33655	26304	21551.8	58425.8	60538	57753.2	-	-	-	-	-	-	-	1.36326	0.00187391	0.293641	-1.76787	down	1.24813	0.00962716	0.413059	-1.27558	down	1.50627	0.00371689	0.282076	-1.82584
pmp001073	168.1	150.09	167.095	C9H13NO2	[M+H]+	Synephrine; 4-[1-Hydroxy-2-(methylamino)ethyl]phenol	Alkaloids	Phenolamine	94-07-5	3	1.44044e+07	3.11721e+07	1.29081e+07	2.23494e+07	2.42609e+07	2.26206e+07	2.6968e+07	3.081e+07	2.72282e+07	4.88035e+07	3.15354e+07	3.73027e+07	1.90777e+07	1.52781e+07	2.09461e+07	1.97528e+07	2.07579e+07	2.01665e+07	C04548	-	-	-	-	-	-	-	-	-	-	-	1.07651	0.0648799	2.01149	1.00827	up	-	-	-	-
MW0002668	155.05	127.05	154.038	C6H6N2O3	[M+H]+	2-Amino-4-nitrophenol	Phenolic acids	Phenolic acids	-	3	1.58222e+06	1.56662e+06	1.29908e+06	3.13955e+06	4.39373e+06	3.86224e+06	3.38272e+06	1.46013e+06	693637	880039	1.0429e+06	1.1279e+06	941951	1.14642e+06	1.14531e+06	1.57935e+06	1.55382e+06	1.63467e+06	C19321	-	-	-	-	-	-	1.41827	0.0139027	0.267723	-1.90119	down	-	-	-	-	-	1.06597	0.119341	0.485847	-1.04143
Yalp008000	335.26	81.07	334.251	C21H34O3	[M+H]+	(2S,3S,5R)-2-[[(1R,4aR,8aR)-5,5,8a-trimethyl-2-methylene-decalin-1-yl]methyl]-5-methoxy-tetrahydrofuran-3-carbaldehyde*	Terpenoids	Ditepenoids	-	1	1.36332e+06	736259	979660	615920	723996	581668	292455	166552	142999	92237.6	196370	98359.3	140959	225014	165153	472953	496053	473206	-	-	-	-	-	-	-	1.37647	0.000930022	0.201379	-2.31201	down	1.31126	0.0352317	0.12567	-2.99229	down	1.43998	0.00228881	0.313287	-1.67444
Wcsp002820	348.18	330.17	347.173	C19H25NO5	[M+H]+	nerinine	Alkaloids	Alkaloids	-	2	1.5449e+06	1.44417e+06	1.61366e+06	2.16008e+07	1.85969e+07	2.03278e+07	1.78971e+06	754016	1.44215e+06	1.8316e+06	673053	1.94516e+06	845853	647652	631292	4.86293e+06	5.14372e+06	4.98736e+06	-	-	-	-	-	-	-	1.40865	0.000420554	0.0735195	-3.76573	down	-	-	-	-	-	1.51651	0.000789139	0.0658545	-3.92457
Wbsp001894	292.19	274.18	291.183	C17H25NO3	[M+H]+	palhinine A*	Alkaloids	Alkaloids	-	2	0	0	0	2.0974e+06	2.30181e+06	1.53608e+06	5.40079e+06	1.94797e+07	1.14991e+07	5.51426e+06	5.93657e+06	4.02291e+06	4.48197e+06	2.22754e+06	1.90536e+06	4.84798e+06	5.0986e+06	4.86249e+06	-	-	1.19184	0.227766	0.425342	-1.23331	down	1.37143	0.0203786	2.60707	1.38243	up	1.36163	0.0124287	#DIV/0!	#DIV/0!	up	1.40033	0.130057	6.12937	2.61574
MWSHC2022	359.1	197.05	361.113	C15H20O10	[M-H]-	Glucosyringic acid	Phenolic acids	Phenolic acids	33228-65-8	3	52797.4	24753.8	45267.9	103162	81517.4	92754.3	167755	186047	88022.7	19521	26493	34366.7	46026	55415.3	26866.2	50876.8	53152.6	53707.4	-	-	1.67815	0.0544625	0.181929	-2.45855	down	1.39537	0.00165656	0.289729	-1.78722	down	-	-	-	-	-	-	-	-	-
Hmlp002306	189.14	158.09	188.131	C12H16N2	[M+H]+	Dimethyltryptamine	Alkaloids	Plumerane	61-50-7	3	1.4292e+06	1.38521e+06	1.34752e+06	28708.2	36873.2	116532	935353	1.20162e+06	6348.39	111465	216537	137264	36106	57731.2	24838.6	571996	599234	569229	C08302	-	-	-	-	-	-	1.09505	0.0901391	2.55481	1.35322	up	1.33959	1.27727e-05	0.111791	-3.16113	down	-	-	-	-
Lmxp001668	151.08	91.05	150.068	C9H10O2	[M+H]+	2-Methoxy-4-ethenylphenol	Phenolic acids	Phenolic acids	7786-61-0	1	153093777	1.16393e+08	1.51381e+08	1.2781e+06	2.48811e+06	2.36001e+06	2.02677e+06	4.71057e+06	3.6401e+06	1.85525e+06	4.44037e+06	2.08108e+06	2.09119e+06	1.94873e+06	1.44568e+06	2.63806e+07	2.78128e+07	2.76586e+07	C17883	-	-	-	-	-	-	-	-	-	-	-	1.3466	0.0072612	0.0199034	-5.65084	down	-	-	-	-
Wbsp001883	292.16	274.18	291.147	C16H21NO4	[M+H]+	lyeojaponicumnin A	Alkaloids	Alkaloids	-	2	2.39887e+06	2.23478e+06	3.2183e+06	1.21332e+06	1.08847e+06	1.12937e+06	3.78206e+06	3.81656e+07	2.13177e+07	4.45256e+06	4.80749e+06	6.49371e+06	3.77345e+06	2.71943e+06	2.07148e+06	1.04294e+07	1.09555e+07	10419704	-	-	1.03474	0.251351	0.249011	-2.00572	down	1.42751	0.0223876	4.59138	2.19893	up	1.22791	0.035006	2.00635	1.00457	up	1.35468	0.182245	18.4385	4.20465
Wccp002839	302.14	147.04	301.131	C17H19NO4	[M+H]+	9-O-Demethylhomolycorine	Alkaloids	Alkaloids	6879-81-8	1	391740	196220	433329	3.18012e+07	2.94305e+07	3.07459e+07	2.65116e+07	3.92417e+06	1.08162e+07	4.91169e+07	5.92629e+06	6.69748e+07	226008	123826	138042	1.67497e+07	1.76318e+07	1.67908e+07	-	-	-	-	-	-	-	-	-	-	-	-	1.27133	0.155979	119.475	6.90056	up	1.08834	0.125662	0.4485	-1.15682
pmb1096	118.07	91.05	117.058	C8H7N	[M+H]+	Indole	Alkaloids	Plumerane	120-72-9	2	33013598	3.04035e+07	3.59122e+07	1.17247e+07	1.3776e+07	1.45578e+07	1.95325e+07	2.56591e+07	2.3949e+07	1.67151e+07	2.46482e+07	1.56428e+07	1.27777e+07	1.10337e+07	1.11289e+07	2.02607e+07	2.11103e+07	2.14588e+07	C00463	ko00380,ko00400,ko00402,ko01100,ko01110	-	-	-	-	-	-	-	-	-	-	-	-	-	-	-	-	-	-	-
Lshp011008	290.14	149.06	289.131	C16H19NO4	[M+H]+	Sanguinine N-oxide	Alkaloids	Alkaloids	-	1	769363	563320	927751	3.36322e+07	3.8602e+07	2.96861e+07	4.37456e+07	2.30536e+07	3.17704e+07	3.69562e+07	2.81018e+07	4.23877e+07	3.14769e+07	3.12333e+07	1.59762e+07	2.70827e+07	2.62057e+07	2.55335e+07	-	-	-	-	-	-	-	-	-	-	-	-	1.35231	0.0137635	47.5332	5.57086	up	-	-	-	-
Wccp002544	316.12	181.06	315.111	C17H17NO5	[M+H]+	Trispherine	Alkaloids	Alkaloids	-	1	202306	184082	386662	125519	127694	138411	2.5462e+07	6.7479e+07	8.94028e+07	2.61175e+07	18219183	2.92854e+07	1.04529e+07	9.45682e+06	1.03702e+07	1.83797e+07	1.77527e+07	1.88391e+07	-	-	1.22213	0.189986	0.403755	-1.30845	down	1.44352	0.0176893	187.992	7.55453	up	1.35089	0.0178389	95.2361	6.57344	up	1.5267	0.0838159	465.609	8.86298
Wccp003315	316.15	256.13	315.147	C18H21NO4	[M+H]+	Buphandrin	Alkaloids	Alkaloids	-	3	4.63813e+07	4.09386e+07	4.38737e+07	1.32804e+06	898020	1.22961e+06	3.87028e+06	5.3039e+06	939454	1.5675e+06	879368	2.02645e+06	0	0	0	1.33257e+07	1.30035e+07	1.37954e+07	-	-	-	-	-	-	-	-	-	-	-	-	1.35121	0.000908584	0.0340971	-4.87421	down	-	-	-	-
Zbsn012113	379.21	295.19	380.22	C21H32O6	[M-H]-	Diacetoxy-[6]-gingerdiol	Phenolic acids	Phenolic acids	143615-75-2	2	5153.61	5886.93	7729.96	6293.43	10445.8	5993.02	3598.84	1909.46	7566.59	1739.46	1740.63	1667.44	1604.53	2146.25	1130.67	4287.83	4150.33	4040.56	-	-	1.2222	0.255699	0.393696	-1.34484	down	1.39784	0.0551234	0.226442	-2.14279	down	1.33362	0.0272202	0.274236	-1.86651	down	-	-	-	-
pma3649	132.07	86.06	131.058	C5H9NO3	[M+H]+	5-Aminolevulinic Acid	Alkaloids	Alkaloids	106-60-5	3	1.05997e+07	1.0709e+07	1.19129e+07	5.70311e+06	6.96084e+06	8.42898e+06	1.04163e+07	1.2645e+07	1.03949e+07	8.23864e+06	1.1173e+07	7.32259e+06	6.40355e+06	6.33305e+06	1.26915e+06	9.50922e+06	9.86562e+06	1.00986e+07	C00430	ko00260,ko00860,ko01100,ko01110,ko01240,ko02010	-	-	-	-	-	-	-	-	-	-	-	-	-	-	-	-	-	-	-
Zdcp003644	251.14	105.07	250.132	C13H18N2O3	[M+H]+	N-Caffeoylputrescine	Alkaloids	Phenolamine	29554-26-5	1	635449	281842	553399	45444.9	89004.1	85249.3	695799	610503	488354	58463.4	209021	70931.2	61310.8	81335.9	59114	284922	291894	274569	C03002	-	1.61318	0.00380313	0.188569	-2.40684	down	-	-	-	-	-	1.17239	0.0539958	0.230107	-2.11963	down	1.50635	0.00989854	8.16873	3.03011
Xmcn005741	447.23	315.19	448.231	C21H36O10	[M-H]-	patrinioside*	Terpenoids	Sesquiterpenoids	-	2	59474.9	29706.3	55447.3	12919.3	5079.75	10864.9	4426.11	11307.2	5556.19	1080.67	9372.49	6335.96	6599.39	7227.27	5191.87	15756.8	14904.1	15799	-	-	-	-	-	-	-	-	-	-	-	-	1.18974	0.0375429	0.116084	-3.10675	down	-	-	-	-
Hmmp002761	560.39	560.39	559.387	C33H53NO6	[M+H]+	γ-Solanine	Alkaloids	Steroid alkaloids	511-37-5	2	2.4074e+06	2.00509e+06	2.42778e+06	527955	2.06522e+06	1.09978e+06	3.80496e+06	2.45838e+06	2125046	2.2715e+06	2.23545e+06	1.92429e+06	5.55203e+06	4.77289e+06	4.06847e+06	2.50691e+06	2.48374e+06	2.35476e+06	-	-	-	-	-	-	-	-	-	-	-	-	-	-	-	-	-	1.1386	0.084554	2.27146	1.18362
Wcsn009756	333.2	251.2	334.214	C20H30O4	[M-H]-	Epoxyeleganolactone*	Others	Others	-	3	106406	67806.4	96671.9	93378.1	130299	119303	35025.3	11381.3	25798.5	30956.9	60492.9	31067.5	30772.7	27418.6	25447.8	58713.7	58347.6	62035.1	-	-	-	-	-	-	-	1.30439	0.00773901	0.357214	-1.48514	down	1.1514	0.0324598	0.452287	-1.14469	down	1.42351	0.00409822	0.210523	-2.24795
pme2433	106.09	88.08	105.079	C4H11NO2	[M+H]+	Diethanolamine	Alkaloids	Alkaloids	111-42-2	3	132065	158500	115626	281687	274703	359661	84786.8	79459	160577	97741	102561	65171.2	114446	122315	117955	189260	190407	178596	C06772	ko00564	-	-	-	-	-	1.39748	0.00730454	0.289803	-1.78686	down	-	-	-	-	-	1.41324	0.00647313	0.354591	-1.49577
Zmsp003001	272.13	226.09	271.121	C16H17NO3	[M+H]+	Caranine	Alkaloids	Isoquinoline alkaloids	477-12-3	1	4.23642e+06	8.22376e+06	5.89584e+06	1.30991e+07	1.9113e+07	1.32578e+07	6.96429e+06	7.91494e+06	5.84617e+06	2.9311e+06	5.83135e+06	3.94347e+06	6.58461e+06	7.29454e+06	9.60735e+06	7.65352e+06	8.20019e+06	7.82341e+06	-	-	-	-	-	-	-	1.349	0.018794	0.279436	-1.83941	down	-	-	-	-	-	1.42881	0.0433271	0.455804	-1.13351
Lhzp110911	302.14	226.09	301.131	C17H19NO4	[M+H]+	4-O-methylnangustine	Alkaloids	Alkaloids	-	2	4.62204e+07	4.13169e+07	4.93154e+07	1.93203e+06	2.84449e+06	1.91061e+06	2.71556e+07	5.52346e+07	3.66163e+06	1.2966e+06	1.93047e+07	1.7483e+06	249955	146017	104781	1.92014e+07	2.04559e+07	1.92801e+07	-	-	1.00715	0.289384	0.259723	-1.94495	down	-	-	-	-	-	1.12388	0.0137787	0.163312	-2.6143	down	1.22454	0.217913	12.8683	3.68575
MWSmce248	163.04	119.05	164.047	C9H8O3	[M-H]-	3-Hydroxycinnamic Acid*	Phenolic acids	Phenolic acids	14755-02-3	1	102982	217491	151652	31720.9	32606.1	30345.7	82087.9	56209.6	74446.8	96788.3	59548.1	120624	144035	116150	139926	97985.3	100063	93258.6	C12621	ko00360,ko01100	-	-	-	-	-	1.33359	0.0757326	2.92545	1.54866	up	-	-	-	-	-	1.47184	0.0351677	2.24716	1.1681
Lmbn002648	163.04	119.05	164.047	C9H8O3	[M-H]-	α-Hydroxycinnamic Acid*	Phenolic acids	Phenolic acids	5801-57-0	1	102982	217491	151652	31720.9	32606.1	30345.7	82087.9	56209.6	74446.8	96788.3	59548.1	120624	144035	116150	139926	97985.3	100063	93258.6	C02763	ko00360,ko01100	-	-	-	-	-	1.33359	0.0757326	2.92545	1.54866	up	-	-	-	-	-	1.47184	0.0351677	2.24716	1.1681
Hmqn004297	479.26	337.23	480.272	C26H40O8	[M-H]-	Pharboside B	Terpenoids	Ditepenoids	-	2	2707.8	4656.95	4686.39	4354.12	3795.45	2241.48	4603.75	2792.74	6357.93	6691.52	3788.13	6271.3	13649.2	12167.3	10059.4	5986.7	6107.57	5688.29	-	-	-	-	-	-	-	-	-	-	-	-	-	-	-	-	-	-	-	-	-
pme2244	190.09	118.07	189.079	C11H11NO2	[M+H]+	3-Indolepropionic acid	Alkaloids	Plumerane	830-96-6	2	4.18033e+06	3.58759e+06	4.46281e+06	766321	1.15879e+06	1.1764e+06	1.85523e+06	2.63442e+06	2.69071e+06	1.48103e+06	2.93259e+06	1.2303e+06	884323	820794	748308	2.05532e+06	2.07243e+06	2.19781e+06	-	-	-	-	-	-	-	-	-	-	-	-	1.13436	0.0358722	0.461455	-1.11574	down	1.41518	0.0213388	2.31512	1.21109
Hmzp004605	463.13	301.08	462.116	C22H22O11	[M+H]+	Ladanetin-6-O-β-D-glucosid*	Flavonoids	Flavones	-	2	666169	338503	638678	194268	97057.1	100126	229823	276478	143314	90444.2	93841.2	137633	182626	178557	92054.7	252068	270960	257732	-	-	1.46418	0.0926585	0.495552	-1.01289	down	-	-	-	-	-	1.30805	0.0496988	0.195891	-2.35187	down	-	-	-	-
Lmzp003207	333.19	153.13	332.183	C16H28O7	[M+H]+	(3R,4R)-p-Menth-1-ene-3,4-diol-3-O-β-D-glucoside*	Others	Alcohol compounds	-	3	3.22766e+06	2.65861e+06	3.54801e+06	1.36735e+06	941838	1.0662e+06	133401	478731	271104	84223.4	180378	96985.9	99040.4	65947.3	67391.2	1.00364e+06	1.03642e+06	960344	-	-	1.20372	0.219751	0.409389	-1.28846	down	1.40884	0.0119022	0.107125	-3.22264	down	1.34527	0.00672925	0.0383269	-4.7055	down	1.35584	0.00771633	0.26167	-1.93418
Lamp000484	116.07	70.06	115.063	C5H9NO2	[M+H]+	4-Methylazetidine-2-Carboxylic acid*	Alkaloids	Alkaloids	1779725-63-1	1	7.96846e+06	9.17985e+06	8.09371e+06	3.28436e+06	5.63661e+06	6.49936e+06	5.70652e+06	6.77244e+06	6.98745e+06	4.85795e+06	1.04121e+07	3.75176e+06	4.08706e+06	4.10716e+06	4.14432e+06	7.62423e+06	7.7195e+06	7.18231e+06	-	-	-	-	-	-	-	-	-	-	-	-	-	-	-	-	-	-	-	-	-
Lmsn003522	327.12	147.05	328.131	C19H20O5	[M-H]-	Uvafzelic acid	Others	Others	77744-55-9	2	37886.2	56558.9	33705.4	86722.6	122062	117482	84795.7	74487	12900.3	54279.8	43936.3	82561.3	138038	140632	133966	72865	69017.7	67725.4	-	-	-	-	-	-	-	-	-	-	-	-	-	-	-	-	-	-	-	-	-
mws2212	179.03	135.05	180.042	C9H8O4	[M-H]-	Caffeic acid	Phenolic acids	Phenolic acids	331-39-5	2	344683	493023	630085	181617	214170	168307	377472	336023	107208	616627	597387	658672	1.24809e+06	1.30429e+06	894800	430414	402182	404003	C01197	ko00940,ko01100,ko01110	1.33684	0.0474149	2.28181	1.19018	up	1.43823	7.36284e-05	3.31982	1.7311	up	-	-	-	-	-	-	-	-	-
Lman002731	341.09	135.04	342.095	C15H18O9	[M-H]-	Grevilloside F	Phenolic acids	Phenolic acids	1094004-50-8	1	156820	101989	143084	36613.3	40107.7	43411.1	123932	61606.6	45238.3	148085	94627.6	218020	174600	206093	121764	97603.2	104355	97694.8	-	-	-	-	-	-	-	1.34514	0.0859414	3.83522	1.93931	up	-	-	-	-	-	-	-	-	-
Zjbn102543	475.18	179.07	476.183	C28H28O7	[M-H]-	Bletilols B	Others	Others	-	1	49519.1	46744.5	43976.2	61632.6	39480.7	78582.8	68922.1	38440.1	6925.54	18347.7	14533.3	40156.8	41397.8	22508.2	26318.7	35963.8	34559.8	37349.1	-	-	-	-	-	-	-	1.16646	0.0690922	0.406451	-1.29885	down	-	-	-	-	-	-	-	-	-
Wagp001323	180.14	121.06	179.131	C11H17NO	[M+H]+	4-[2-(1-methylethyl)aminoethyl]phenol	Alkaloids	Quinoline alkaloids	-	2	2.2132e+06	2.1422e+06	2.83738e+06	532706	456267	513514	64567.8	17766.4	132898	73257.1	34136.7	14304.8	131782	113180	154080	920428	921607	984352	-	-	-	-	-	-	-	1.36778	0.000144589	0.0809981	-3.62597	down	1.32222	0.00835644	0.0169195	-5.88517	down	1.37434	0.00083259	0.14325	-2.80339
Zmsp007138	264.06	206.06	263.058	C16H9NO3	[M+H]+	Hippadine	Alkaloids	Plumerane	52886-06-3	1	5909.83	10368.5	7063	160552	58046.2	2.05518e+06	1.47246e+06	59510.2	23012.6	82155	689327	15753.8	25348.9	61900.2	49261.2	325960	314294	301335	-	-	-	-	-	-	-	-	-	-	-	-	1.04736	0.356753	33.7272	5.07584	up	-	-	-	-
mws4002	154.09	137.06	153.079	C8H11NO2	[M+H]+	Dopamine	Alkaloids	Phenolamine	51-61-6	3	3.18854e+06	3.67022e+06	6.60775e+06	190451	70003.5	100773	84819	107598	143176	52632.1	92877.6	23750.7	27196	53398.4	35790.6	994930	1.07466e+06	1.02238e+06	C03758	ko00350,ko00950,ko00965,ko01100,ko01110	-	-	-	-	-	-	-	-	-	-	1.32752	0.0534489	0.012569	-6.31399	down	-	-	-	-
Zjyp110109	181.12	121.1	180.115	C11H16O2	[M+H]+	oxyphyllone F	Terpenoids	Sesquiterpenoids	-	3	410903	197967	118418	315545	123442	460437	383930	362797	324700	170564	177474	119688	238256	206404	196372	260181	243277	243048	-	-	1.66618	0.00133611	0.436545	-1.1958	down	-	-	-	-	-	-	-	-	-	-	-	-	-	-
Laln002027	431.12	137.02	432.127	C18H24O12	[M-H]-	3,4-dihydroxybenzaldehyde-xylose-glucoside*	Phenolic acids	Phenolic acids	-	2	42285.6	26776.6	41113.6	10067.3	13647.5	11256.7	2902.09	2760.1	8650.88	847.484	1397.09	967.663	5665.57	4144.77	2401.38	14889.2	15221.8	16068.3	-	-	1.51439	0.195967	0.224427	-2.15568	down	1.42718	0.00846717	0.0918532	-3.44453	down	1.3531	0.0189055	0.0291556	-5.10008	down	1.25069	0.0505927	0.409278	-1.28885
Lakn002075	431.12	137.02	432.127	C18H24O12	[M-H]-	4-Hydroxybenzoic acid glucosyl xyloside*	Phenolic acids	Phenolic acids	-	2	42285.6	26776.6	41113.6	10067.3	13647.5	11256.7	2902.09	2760.1	8650.88	847.484	1397.09	967.663	5665.57	4144.77	2401.38	14889.2	15221.8	16068.3	-	-	1.51439	0.195967	0.224427	-2.15568	down	1.42718	0.00846717	0.0918532	-3.44453	down	1.3531	0.0189055	0.0291556	-5.10008	down	1.25069	0.0505927	0.409278	-1.28885
Zblp001009	272.11	110.06	271.106	C12H17NO6	[M+H]+	3-pyridine-methanol-O-β-D-glucopyranosyl*	Alkaloids	Pyridine alkaloids	-	2	2.40624e+06	1.19928e+06	1.391e+06	179770	159680	149085	488834	1.07402e+06	225544	129031	193379	134756	133434	95997.3	67655.8	573526	608489	619404	-	-	1.38686	0.218147	0.255629	-1.96788	down	-	-	-	-	-	1.33689	0.055736	0.0914971	-3.45013	down	1.20648	0.226003	3.66074	1.87214
Wcsp003173	310.09	229.05	309.085	C14H15NO7	[M+H]+	trans-dihydronarciclasine	Alkaloids	Alkaloids	40042-05-5	2	2.53047e+06	1.36033e+06	2.07046e+06	451720	360816	422790	479818	1.31474e+06	1.33878e+06	341956	335722	448503	621959	512636	383386	865697	938522	902007	-	-	1.4003	0.139136	0.359419	-1.47626	down	-	-	-	-	-	1.33073	0.0404389	0.188916	-2.40418	down	1.18651	0.15322	2.53645	1.34281
MWSHY0176	301.11	181.05	300.1	C17H16O5	[M+H]+	Farrerol (6,8-Dimethyl-5,7,4'-trihydroxyflavanone)*	Flavonoids	Flavanones	24211-30-1	3	183446	2.98935e+06	17812.7	221884	46421.5	1.79907e+06	1.35504e+06	9004.03	21481.6	9995.62	70933.6	15571.9	508662	140469	106315	476492	447928	441559	C09734	-	-	-	-	-	-	1.0405	0.359681	0.0466782	-4.42111	down	-	-	-	-	-	-	-	-	-
Saln000494	563.18	503.16	564.184	C27H32O13	[M-H]-	6-O-E-P-Methoxycinnamoyl Scandoside Methyl Ester	Terpenoids	Monoterpenoids	-	3	3.79784e+06	3.52234e+06	3.89858e+06	8.13967e+06	3.30207e+06	7.14222e+06	3.34082e+06	2.90565e+06	1.48626e+06	2.75415e+06	1.44943e+06	3.88601e+06	6.61856e+06	7.39878e+06	1.1144e+07	4.16102e+06	3.98849e+06	3.83384e+06	-	-	-	-	-	-	-	1.06859	0.125962	0.4353	-1.19992	down	-	-	-	-	-	1.14995	0.120525	0.416097	-1.26501
Zmyn003394	181.05	166.03	182.058	C9H10O4	[M-H]-	2',6'-Dihydroxy-4'-methoxyacetophenone	Others	Ketone compounds	7507-89-3	2	153109	48699.1	60827	182631	194233	167600	135142	72279.4	9173.24	197319	74574.7	186096	56833.3	17369.7	4186.93	100196	102796	94681.4	C10680	-	-	-	-	-	-	-	-	-	-	-	-	-	-	-	-	-	-	-	-
mws0005	161.11	144.08	160.1	C10H12N2	[M+H]+	Tryptamine	Alkaloids	Plumerane	61-54-1	3	220208	284589	282803	56730.2	60319.3	68735.6	115687	179870	134093	110325	198511	98987.7	75611	67542.3	64809.6	155055	144281	155440	C00398	ko00380,ko00901,ko01100,ko01110	-	-	-	-	-	1.24973	0.141208	2.19514	1.13431	up	-	-	-	-	-	1.46474	0.0467344	2.31262	1.20953
Zmsp001274	288.16	199.08	287.152	C17H21NO3	[M+H]+	Epigalanthamine	Alkaloids	Alkaloids	-	2	1.28876e+07	8.89837e+06	1.1396e+07	2.60743e+06	3.17038e+06	4.19906e+06	1.77741e+06	1.16168e+06	3.48436e+06	4.59874e+06	2.03568e+06	6.13297e+06	9.25712e+06	6.34939e+06	2.72609e+06	6.88523e+06	7.43077e+06	7.39448e+06	-	-	-	-	-	-	-	-	-	-	-	-	1.14953	0.0151284	0.38477	-1.37793	down	-	-	-	-
Wcsn010349	359.22	277.22	360.23	C22H32O4	[M-H]-	Moniliferanone D	Others	Others	-	1	3.55159e+06	3.02981e+06	3.48743e+06	2.75571e+06	3.71204e+06	2.81717e+06	1.88525e+06	1.03895e+06	1.61298e+06	794932	1.46609e+06	823694	792612	533871	340969	2.25967e+06	2.20343e+06	2.07951e+06	-	-	-	-	-	-	-	1.3362	0.0073706	0.332229	-1.58975	down	1.28817	0.00145654	0.306363	-1.70669	down	1.35868	0.017785	0.48866	-1.0331
Wbmn010531	377.23	317.21	378.241	C22H34O5	[M-H]-	Previtexilactone	Terpenoids	Ditepenoids	61263-52-3	2	298118	359580	434775	452426	672528	349931	254924	95766.1	455466	106421	115240	113206	96177.1	126483	64032.7	244758	255103	234388	-	-	1.06376	0.270169	0.415387	-1.26747	down	1.39107	0.0572656	0.227046	-2.13894	down	1.33306	0.023197	0.306522	-1.70594	down	-	-	-	-
Zbzn010406	373.17	273.11	374.173	C21H26O6	[M-H]-	Hydroxyshikonofuran C	Quinones	Quinones	-	2	16141.4	27301.8	28221.9	15016.3	11690.8	14538.8	9146.49	6395.57	20759	4264.22	2909.67	4266.86	5503.62	6275.4	6623.88	10606.2	11325.7	11495.6	-	-	1.42593	0.199339	0.315163	-1.66583	down	1.41799	0.00444396	0.277379	-1.85007	down	1.31859	0.0339299	0.159642	-2.64709	down	-	-	-	-
Zmhn002422	355.1	193.05	356.111	C16H20O9	[M-H]-	1-O-Feruloyl-β-D-glucose*	Phenolic acids	Phenolic acids	7196-71-6	1	508256	147361	520204	30842.1	27306.8	30763.3	44816.2	52411.1	52716.5	166439	243212	183514	51229.3	42175.2	25784.7	140088	135630	128644	C17759	-	1.727	0.0227983	3.95591	1.98401	up	1.43694	0.0184314	6.67135	2.73798	up	-	-	-	-	-	-	-	-	-
MWSHC2062	355.1	193.05	356.111	C16H20O9	[M-H]-	Ferulic β-glucoside*	Phenolic acids	Phenolic acids	14364-12-6	1	508256	147361	520204	30842.1	27306.8	30763.3	44816.2	52411.1	52716.5	166439	243212	183514	51229.3	42175.2	25784.7	140088	135630	128644	-	-	1.727	0.0227983	3.95591	1.98401	up	1.43694	0.0184314	6.67135	2.73798	up	-	-	-	-	-	-	-	-	-
Yacp000453	116.07	70.06	115.063	C5H9NO2	[M+H]+	3-hydroxy-1-methylpyrrolidin-2-one*	Alkaloids	Pyrrole alkaloids	132996-63-5	1	8.40364e+06	8.69033e+06	8.33912e+06	3.2105e+06	5.72924e+06	6.56244e+06	5.69135e+06	7.04285e+06	7.1318e+06	4.61795e+06	9.71351e+06	3.81889e+06	4.20371e+06	4.10593e+06	4.02299e+06	7.63779e+06	7.93546e+06	7.28317e+06	-	-	-	-	-	-	-	-	-	-	-	-	-	-	-	-	-	-	-	-	-
Cmyp007180	181.12	107.09	180.115	C11H16O2	[M+H]+	Dihydroactinidiolide	Others	Lactones	17092-92-1	1	629148	338949	212408	563833	169186	708949	633743	541513	516063	284436	263783	199368	415464	341401	309624	407720	385460	374926	-	-	1.67382	0.0029133	0.442014	-1.17783	down	-	-	-	-	-	-	-	-	-	-	-	-	-	-
Lshp011108	360.14	268.1	359.137	C19H21NO6	[M+H]+	8-O-acetylhomolycorine-α-N-oxide*	Alkaloids	Pyrrole alkaloids	-	1	959505	591204	1.26901e+06	2.60891e+07	1.42782e+07	1.71973e+07	1.18224e+06	1.16915e+06	9.73046e+06	1.13856e+08	8.01267e+06	1.36446e+08	708002	471989	496295	2.46862e+07	2.69444e+07	2.58788e+07	-	-	1.40911	0.173246	21.3804	4.41822	up	-	-	-	-	-	1.22352	0.164376	91.61	6.51743	up	1.27185	0.031221	0.209883	-2.25234
Zbln013951	377.13	116.93	377.139	C23H22O5	[M-H]-	1-(3'-methoxy-4'-hydroxybenzyl)-2,7-dihydroxy-4-methoxyphenanthrene	Quinones	PhenAnthraquinones	-	2	123975	70156.6	68647.9	57591.4	76004.2	56553.7	36454.1	22991.6	30582.1	19868.3	26430.2	16896.5	14320.7	13295	6420.92	52028.8	47727.3	49324.4	-	-	-	-	-	-	-	1.37909	0.0110782	0.332344	-1.58925	down	1.29586	0.064134	0.240487	-2.05597	down	1.41826	0.0163951	0.473458	-1.07869
Zmwp002586	330.13	270.11	329.126	C18H19NO5	[M+H]+	1-O-Acetyllycorine	Alkaloids	Isoquinoline alkaloids	-	2	285709	858093	378881	0	0	0	8.97904e+06	3.96099e+07	3.38685e+07	8.03073e+06	9.14833e+06	1.02895e+07	9.88275e+06	6.8655e+06	7.26661e+06	7.77784e+06	8.4156e+06	7.84154e+06	C12166	-	1.21808	0.189962	0.333124	-1.58587	down	1.44704	0.00503323	#DIV/0!	#DIV/0!	up	1.33326	0.00349828	18.0396	4.17309	up	1.53429	0.0997757	#DIV/0!	#DIV/0!
Hajp008429	301.11	181.05	300.1	C17H16O5	[M+H]+	4',5-dihydroxy-7-methoxy-6-methylfavanone*	Flavonoids	Flavones	-	3	170407	2.85714e+06	16296.7	212175	44830	1.75076e+06	1.43622e+06	5468.25	8018.92	6943.56	57471.3	23925.3	447296	129045	106001	482755	458257	442238	-	-	-	-	-	-	-	1.03889	0.359811	0.0439992	-4.50638	down	-	-	-	-	-	-	-	-	-
pmb0501	131.13	114.1	130.122	C5H14N4	[M+H]+	Agmatine	Alkaloids	Alkaloids	306-60-5	3	526229	595254	522957	423156	463827	404118	955495	920104	810022	402224	627218	386696	699936	762997	882210	691915	658839	633388	C00179	ko00330,ko01100	-	-	-	-	-	-	-	-	-	-	-	-	-	-	-	1.51743	0.0037966	2.0801	1.05665
Wchn002854	341.12	179.06	342.132	C16H22O8	[M-H]-	(2r,3r,4s,5s,6r)-2-{[(1r,2r,4r)-2,4-dihydroxy-1,2,3,4-tetrahydronaphthalen-1-yl]oxy}-6-(hydroxymethyl)oxane-3,4,5-triol	Others	Others	-	2	143644	135670	170646	56342.2	86595.3	113803	233653	81174.8	56990.8	295753	183384	406766	309233	383245	271371	155955	145624	158576	-	-	1.25336	0.115491	2.38262	1.25255	up	1.28683	0.0747529	3.45058	1.78684	up	-	-	-	-	-	-	-	-	-
Wcjp001185	334.13	316.12	333.121	C17H19NO6	[M+H]+	ungminorine N-oxide	Alkaloids	Alkaloids	-	2	3.88297e+06	2.79997e+06	3.46402e+06	1.78787e+07	1.40355e+07	1.56892e+07	1.33553e+07	2.1976e+07	4.69148e+07	6.43263e+06	4.62071e+06	9.34344e+06	1.87188e+07	1.64633e+07	1.2073e+07	8.48751e+06	9.26124e+06	9.08447e+06	-	-	1.47638	0.17487	0.247997	-2.01161	down	1.31289	0.00769036	0.428473	-1.22272	down	1.10653	0.124601	2.01014	1.00729	up	-	-	-	-
Lmyn003028	431.16	269.1	432.163	C19H28O11	[M-H]-	Benzyl-β-gentiobioside*	Phenolic acids	Phenolic acids	56775-64-5	3	64454.1	38800	28675.6	111220	151825	76279.5	71621.9	78133	61343.2	160280	47929.2	77924.7	152452	176290	70155.7	41071.2	44974.8	42953.9	-	-	-	-	-	-	-	-	-	-	-	-	-	-	-	-	-	-	-	-	-
Lmzp003064	333.19	153.13	332.183	C16H28O7	[M+H]+	(3R,4S,6R)-p-Menth-1-ene-3,6-diol-3-O-β-D-glucoside*	Others	Alcohol compounds	-	3	2.94573e+06	2.68285e+06	3.20443e+06	1.41361e+06	1.0165e+06	1.26219e+06	178987	558974	284041	69942.6	239984	131666	119451	103630	101335	1.12708e+06	1.0626e+06	1.03136e+06	-	-	1.17382	0.224115	0.432086	-1.21061	down	1.37029	0.00479693	0.119598	-3.06373	down	1.32652	0.00126241	0.0499935	-4.32212	down	1.37085	0.00534661	0.276792	-1.85312
Labn003976	517.23	205.12	518.236	C24H38O12	[M-H]-	Vomifoliol 9-[Xylosyl-(1->6)-Glucoside]	Terpenoids	Monoterpenoids	-	2	23448.4	12334.4	18489.5	22555.1	15350.6	20586.1	5252.71	11192.4	10273.7	1866.51	1551.27	6610.27	9660.11	10939.7	2626.27	10195.2	9998.91	10908.8	-	-	1.32749	0.0880855	0.375317	-1.41382	down	1.31496	0.00487885	0.171444	-2.54419	down	1.22437	0.0269309	0.184773	-2.43617	down	1.29073	0.0209949	0.456797	-1.13038
Wccp002510	334.16	227.1	333.158	C18H23NO5	[M+H]+	Tazettadiol	Alkaloids	Alkaloids	-	2	1.84102e+07	1.06497e+07	1.78087e+07	734784	893362	439645	502237	201797	539753	226529	211584	184919	226855	186900	120041	3.22003e+06	3.52829e+06	3.33332e+06	-	-	-	-	-	-	-	1.34573	0.0672969	0.301303	-1.73071	down	1.35745	0.0251616	0.0132932	-6.23317	down	-	-	-	-
Lafp007563	219.17	121.1	218.167	C15H22O	[M+H]+	Costal	Terpenoids	Sesquiterpenoids	-	1	176542	180810	134538	231668	145905	221557	291529	226313	269663	175739	167330	149218	116375	154657	111243	196260	187691	178533	-	-	-	-	-	-	-	-	-	-	-	-	-	-	-	-	-	-	-	-	-
mws1346	162.08	98.06	161.069	C6H11NO4	[M+H]+	DL-2-Aminoadipic acid	Alkaloids	Alkaloids	542-32-5	3	1.62524e+06	1.54997e+06	1.40023e+06	1.85375e+06	4.53491e+06	3.49952e+06	602651	754283	2.29067e+06	689567	1.42153e+06	557092	1.44856e+06	1.55797e+06	1.8228e+06	1.80527e+06	1.96968e+06	1.82711e+06	C00956	ko00300,ko00310,ko00311,ko01100,ko01110,ko01210,ko01230	-	-	-	-	-	1.23292	0.0782175	0.269836	-1.88985	down	-	-	-	-	-	1.1619	0.101933	0.368886	-1.43875
Hamp007385	301.11	181.05	300.1	C17H16O5	[M+H]+	5-hydroxy-7,8-dimethoxyflavanone*	Others	Others	-	3	175058	2.82251e+06	22336.6	222150	46462.3	1.70448e+06	1.496e+06	6733.76	19914.6	8686.1	56618.6	4055.57	475578	137129	100292	496095	465827	451836	-	-	-	-	-	-	-	1.10112	0.350863	0.035153	-4.83021	down	-	-	-	-	-	-	-	-	-
Wcsp001876	302.14	284.15	301.131	C17H19NO4	[M+H]+	haemanthamine	Alkaloids	Alkaloids	466-75-1	3	2.04316e+06	1.50917e+06	2.1317e+06	3.39202e+06	4.35494e+06	3.95366e+06	3.08712e+07	2.75826e+07	1.35421e+07	3.83078e+06	3.12369e+06	4.68669e+06	4.08893e+06	3.91247e+06	2.73712e+06	7.43802e+06	8.19511e+06	7.79729e+06	-	-	1.68171	0.0622236	0.161692	-2.62868	down	-	-	-	-	-	1.22848	0.032896	2.04805	1.03425	up	1.47948	0.0629478	6.15316	2.62133
Hahp000801	118.08	72.08	117.079	C5H11NO2	[M+H]+	alanine betaine	Alkaloids	Alkaloids	-	1	1.56717e+07	1.36268e+07	1.55673e+07	3.76482e+06	4.9669e+06	6.05521e+06	7.46352e+06	1.14798e+07	7.75847e+06	6.39832e+06	9.67153e+06	4.90312e+06	4.67129e+06	4.88546e+06	4.28736e+06	8.88264e+06	9.76503e+06	9.16002e+06	-	-	-	-	-	-	-	-	-	-	-	-	1.20477	0.0163794	0.46746	-1.09709	down	-	-	-	-
Xmbn003152	367.16	235.12	368.158	C17H24N2O7	[M-H]-	N-(1-deoxy-α-D fructos-1-yl)-L-tryptophan	Alkaloids	Alkaloids	-	2	78646.7	141731	45709.3	95405.8	81797.1	68802.3	24048.6	19304.5	5661.26	25746.9	2614.02	23816.6	9476.14	9019.14	9209.21	39676.5	43471.3	40403	-	-	-	-	-	-	-	1.15557	0.00377292	0.212099	-2.23719	down	1.04334	0.11892	0.196092	-2.3504	down	1.35895	0.00321264	0.199241	-2.32741
Wbmp001584	434.18	255.1	433.174	C22H27NO8	[M+H]+	demethylcoclaurine-glucose*	Alkaloids	Alkaloids	-	2	56046.8	30829.9	44267	378681	302445	387834	239484	140195	189455	174978	102093	256057	204514	184226	225144	167773	183087	168968	-	-	-	-	-	-	-	1.18341	0.0357796	0.498735	-1.00365	down	1.21682	0.0910403	4.06522	2.02333	up	-	-	-	-
Yajn002747	257.07	179.03	258.074	C11H14O7	[M-H]-	Posoquenin	Terpenoids	Monoterpenoids	75853-66-6	2	519543	421265	546365	248775	221614	232472	464421	633423	352261	339160	408022	369354	241925	210254	178685	350067	339959	317780	-	-	-	-	-	-	-	-	-	-	-	-	-	-	-	-	-	1.39057	0.0915314	2.06315	1.04485
Ylgn009136	313.18	313.18	314.188	C20H26O3	[M-H]-	triptobenzene N	Terpenoids	Ditepenoids	-	2	1.06062e+06	878920	1.16987e+06	393112	209762	547566	262314	128563	143761	78548.4	116101	98976.7	97239.8	103136	80964.3	364145	395018	398780	-	-	-	-	-	-	-	1.32036	0.0979258	0.255229	-1.97014	down	1.35291	0.00731921	0.0944314	-3.40459	down	1.10503	0.158492	0.464725	-1.10555
Wcsp002545	320.15	151.07	319.142	C17H21NO5	[M+H]+	11β-Hydroxygalanthamine-N-oxide*	Alkaloids	Alkaloids	-	3	46406.3	19809.9	24181.5	92565.3	77430.6	96472.6	230182	24523.1	444344	208620	47387.8	315688	6096.96	11670	7342.4	106413	117426	112977	-	-	-	-	-	-	-	-	-	-	-	-	1.06051	0.174585	6.32423	2.66089	up	-	-	-	-
Wccp002545	320.15	151.07	319.142	C17H21NO5	[M+H]+	1-Epideacetylbowdensine*	Alkaloids	Alkaloids	101219-55-0	3	46406.3	19809.9	24181.5	92565.3	77430.6	96472.6	230182	24523.1	444344	208620	47387.8	315688	6096.96	11670	7342.4	106413	117426	112977	-	-	-	-	-	-	-	-	-	-	-	-	1.06051	0.174585	6.32423	2.66089	up	-	-	-	-
MW0139149	477.1	441.08	478.111	C22H22O12	[M-H]-	Nepitrin	Flavonoids	Flavones	569-90-4	3	283907	228233	361419	72756.2	12684.6	45006.2	228290	436007	382606	285602	148756	279731	73191.1	60537.4	16390.2	145123	160158	154101	-	-	-	-	-	-	-	1.22329	0.0353875	5.47417	2.45264	up	-	-	-	-	-	1.38255	0.0315363	8.02551	3.00459
Lahp003986	435.13	273.08	434.121	C21H22O10	[M+H]+	3,4-Dihydro-4-(4'-hydroxyphenyl)-5,7-dihydroxycoumarin glucoside*	Lignans and Coumarins	Coumarins	-	2	270347	115128	191149	436112	253655	392862	6863.76	20916.4	10962.4	13412.3	3884.7	22577.7	35909.2	33547	24701.5	120784	132065	121911	-	-	-	-	-	-	-	1.39036	0.0232812	0.0368313	-4.76292	down	1.27428	0.0554714	0.0691521	-3.85408	down	1.50215	0.0235844	0.0357856	-4.80448
Lmjn002534	431.16	149.05	432.163	C19H28O11	[M-H]-	Darendoside A	Phenolic acids	Phenolic acids	149596-95-2	1	654737	304427	508431	543405	372779	503588	123497	199358	54176.5	123370	82011.5	110700	131728	117394	83923.1	251001	267657	242878	-	-	-	-	-	-	-	1.42073	0.0150657	0.222628	-2.16729	down	1.29855	0.061484	0.215374	-2.21509	down	1.33595	0.00712603	0.265558	-1.9129
MWS2032	137.07	65.04	136.064	C7H8N2O	[M+H]+	6-Methylnicotinamide	Alkaloids	Pyridine alkaloids	6960-22-1	2	311523	496302	477848	635818	500481	692080	456981	185120	118470	396306	187126	353019	226359	347440	229018	439004	485204	461492	-	-	-	-	-	-	-	-	-	-	-	-	-	-	-	-	-	1.19958	0.0545796	0.415981	-1.26541
MWSmce118	127.05	81.04	126.043	C5H6N2O2	[M+H]+	Imidazole-4-Acetic Acid	Alkaloids	Alkaloids	645-65-8	3	1.30615e+06	1.43192e+06	1.03683e+06	3.94882e+06	3.80568e+06	3.97044e+06	2.70818e+06	1.54436e+06	2.59044e+06	3.06114e+06	2.01885e+06	3420985	3.2986e+06	3.27283e+06	3.23983e+06	2.49968e+06	2.39722e+06	2.26169e+06	C02835	ko00340,ko01100	-	-	-	-	-	-	-	-	-	-	1.22426	0.0555112	2.25197	1.17119	up	-	-	-	-
Wcsn011332	279.23	261.23	280.24	C18H32O2	[M-H]-	Ethyl (10Z,13Z)-hexadeca-10,13-dienoate	Others	Others	-	2	164667	166860	153833	208770	294516	244592	140774	82424.5	141376	75486.2	91654.4	71965.7	55323.3	45364.1	39426.7	145351	131979	135773	-	-	-	-	-	-	-	1.40617	0.0164199	0.319713	-1.64515	down	1.32569	0.000734057	0.492638	-1.0214	down	1.35531	0.0173849	0.487479	-1.03659
HX1349	133.05	69.04	132.042	C5H8O4	[M+H]+	dihydro-4-hydroxy-5-hydroxymethyl-2(3H)-furanone	Others	Others	-	3	867320	933621	1.02962e+06	430955	515770	638736	939004	895581	759263	679004	867179	517743	444485	521651	362219	723463	776420	705672	-	-	-	-	-	-	-	-	-	-	-	-	-	-	-	-	-	-	-	-	-
Qmqp101736	309.24	179.14	308.235	C19H32O3	[M+H]+	Sessilifol O	Terpenoids	Sesquiterpenoids	-	3	27354.2	21630.4	26497.6	145459	105845	89043.6	29219.3	5779.1	42009	11677.6	10896.4	6968.3	10091.2	21157.7	5815.57	40222.7	37593.4	41521.8	-	-	-	-	-	-	-	1.42473	0.024358	0.0868003	-3.52616	down	1.27034	0.00304043	0.39138	-1.35336	down	1.27096	0.0164948	0.226261	-2.14394
MW0134073	477.1	239.06	478.111	C22H22O12	[M-H]-	Isorhamnetin 3-galactoside	Flavonoids	Flavonols	6743-92-6	3	72950	56438.8	59491.2	38887.9	18000.6	17269.2	90326.8	120700	42600.7	23565.8	21942.8	44793.6	10078.9	3783.19	4560.72	40537.6	36706.8	39363.1	-	-	1.41246	0.128292	0.356042	-1.48988	down	-	-	-	-	-	1.18301	0.0261884	0.478093	-1.06464	down	1.28387	0.108402	3.42012	1.77405
MW0115129	211.1	193.09	210.089	C11H14O4	[M+H]+	3-Methyl-1-(2,4,6-trihydroxyphenyl)-1-butanone	Others	Ketone compounds	26103-97-9	3	44428.5	18025.1	37960.4	1.14266e+06	2.29807e+06	1.44112e+07	1.2713e+07	70289.2	254703	6.83169e+06	61138.2	8.03739e+06	4.16534e+06	234716	39179.4	3.42065e+06	3.14439e+06	3.12514e+06	C07350	-	-	-	-	-	-	-	-	-	-	-	1.0287	0.184679	148.687	7.21613	up	-	-	-	-
Lmsn000363	325.13	145.07	326.137	C16H22O7	[M-H]-	Raspberryketone glucoside	Phenolic acids	Phenolic acids	38963-94-9	1	1.96937e+06	1.22588e+06	2.41209e+06	3.3123e+06	994065	2.49942e+06	1.27264e+06	888520	817716	1.13336e+06	662283	2.77596e+06	1.41837e+06	1.29915e+06	1.85365e+06	1.36917e+06	1.39857e+06	1.5078e+06	-	-	-	-	-	-	-	-	-	-	-	-	-	-	-	-	-	1.0534	0.197114	0.437698	-1.19199
Zmsp000366	148.1	130.09	147.089	C6H13NO3	[M+H]+	Fagomine	Alkaloids	Piperidine alkaloids	53185-12-9	2	62435.5	109647	63664.9	330823	303083	278765	182599	108811	139525	184686	151341	165731	252942	249213	248045	210973	231606	213669	C10144	-	-	-	-	-	-	-	-	-	-	-	1.23259	0.0129737	2.12837	1.08975	up	1.43291	0.00505742	0.47217	-1.08262
Lmmn006306	293.21	293.21	294.219	C18H30O3	[M-H]-	Machilusolide D	Others	Lactones	-	2	50173.9	104390	73331.5	166675	470116	130042	103930	45116.7	326072	38554.9	34784.4	44907.9	46301.2	47149.2	46492.6	100951	95302.7	105732	-	-	1.19575	0.298842	0.248879	-2.00648	down	1.29912	0.182596	0.154202	-2.69711	down	-	-	-	-	-	-	-	-	-
Lmmn001643	163.04	119.05	164.047	C9H8O3	[M-H]-	2-Hydroxycinnamic acid*	Phenolic acids	Phenolic acids	583-17-5	1	100331	248377	156651	60356.4	40139.8	35086.7	97594	58398.9	87935.3	106443	78878.5	128165	147609	121570	153222	93783.2	95168	86319.2	C01772	ko00360,ko00999,ko01100,ko01110	-	-	-	-	-	1.2796	0.033815	2.31214	1.20923	up	-	-	-	-	-	-	-	-	-
Lhyp080702	353.23	261.22	352.225	C20H32O5	[M+H]+	Leopersin C(15-epi-leopersin C)	Terpenoids	Monoterpenoids	172821-84-0	2	383585	809137	1.11542e+06	37116.4	79270.9	64368.8	26004.6	31360.9	122283	19260.2	31184.8	14980	64859.1	32148.6	23672.3	203493	190030	183452	-	-	1.04317	0.34678	0.364183	-1.45726	down	1.21631	0.0741981	0.361952	-1.46613	down	1.3221	0.0719036	0.0283453	-5.14075	down	-	-	-	-
Wcjp000960	276.16	175.08	275.152	C16H21NO3	[M+H]+	(1R,12S,14R)-4-methyl-11-oxa-4-azatetracyclo[8.6.1.01,12.06,17]heptadeca-6(17),7,9-triene-9,14-diol*	Alkaloids	Alkaloids	-	1	3.86028e+06	2.77004e+06	3.5061e+06	200188	166336	131514	4.05244e+06	5.30516e+06	3.20657e+06	562336	1.23733e+06	629456	43136.2	45539.8	29163.4	2.48852e+06	2.27318e+06	2.50752e+06	-	-	1.67103	0.0213702	0.193338	-2.37081	down	1.36999	0.0943279	4.8774	2.28611	up	1.28146	0.00424445	0.239644	-2.06104	down	1.52958	0.0221127	25.2274	4.65692
zjbp110819	311.13	251.11	310.12	C19H18O4	[M+H]+	6,7-dimethoxy-2-[2-phenylethyl]chromone	Others	Chromone	-	3	106168	281639	40032.9	24509.6	24001.2	583626	76750.7	42709.7	6015.63	16787.3	50771.9	7119.7	39670.3	117067	61474	111501	100537	109310	-	-	-	-	-	-	-	-	-	-	-	-	-	-	-	-	-	-	-	-	-
Zjxp110304	295.23	151.11	294.219	C18H30O3	[M+H]+	3-Hydroxy-3,7,11-trimethyldodeca-1,6E,10-trien-9-yl isobutyrate	Terpenoids	Sesquiterpenoids	-	1	30358.9	38956.3	45443.6	94924.1	130103	73829.2	31063	20055.2	107231	18979.5	18364.5	12139.2	22524.9	16126.1	16267.9	46987.4	51455.5	46784.6	-	-	1.14552	0.316324	0.312494	-1.6781	down	1.39974	0.0348746	0.165576	-2.59444	down	1.23004	0.021947	0.431194	-1.21359	down	-	-	-	-
pmp001198	132.1	57.03	131.095	C6H13NO2	[M+H]+	6-Deoxyfagomine	Alkaloids	Piperidine alkaloids	197449-09-5	1	2.53101e+07	2.54624e+07	2.96027e+07	1.17849e+07	1.49413e+07	1.74328e+07	2.34868e+07	2.58382e+07	2.04518e+07	1.82556e+07	2.3809e+07	1.44383e+07	1.29092e+07	1.33744e+07	1.03179e+07	2.17481e+07	2.34066e+07	2.106e+07	-	-	-	-	-	-	-	-	-	-	-	-	-	-	-	-	-	-	-	-	-
Wmtn012065	253.22	253.22	254.236	C15H30N2O	[M-H]-	Piperazirum	Alkaloids	Alkaloids	-	2	482275	253603	423741	479365	326791	422569	309432	133418	186028	97708.1	108997	153152	112115	125951	102234	240282	228349	215327	-	-	-	-	-	-	-	1.39784	0.0138091	0.292871	-1.77166	down	1.27341	0.0530368	0.310324	-1.68815	down	-	-	-	-
Cmyp002064	463.12	301.08	462.116	C22H22O11	[M+H]+	Yuanhuanin*	Flavonoids	Flavones	83133-14-6	2	330390	163430	526317	162637	119970	147424	210289	219980	117506	163261	82179.4	152795	186944	176799	117695	265087	237556	250939	-	-	-	-	-	-	-	-	-	-	-	-	1.013	0.181145	0.390374	-1.35707	down	-	-	-	-
Lasp011732	335.26	81.07	334.25	C21H34O3	[M+H]+	Ent-16beta-Methoxy-19-Kauranoic Acid*	Terpenoids	Ditepenoids	-	1	1.53808e+06	736713	945079	630296	663286	564130	282816	156143	130086	95587.3	178961	89084.2	135372	222176	136113	436462	476227	431251	-	-	-	-	-	-	-	1.38991	0.000265569	0.195742	-2.35297	down	1.31253	0.0561668	0.112934	-3.14645	down	1.43543	0.00305027	0.306315	-1.70691
Lhzp110916	332.15	225.09	331.142	C18H21NO5	[M+H]+	Pretazettine*	Alkaloids	Pyrrole alkaloids	17322-84-8	1	5.72667e+06	5.06983e+06	6.06496e+06	2.67766e+06	1.8974e+06	2.09882e+06	145963	207297	99033.7	31834.3	301048	22497.1	23340	22445.3	14178.2	2.08081e+06	2.08755e+06	1.89148e+06	C08536	-	-	-	-	-	-	1.30891	0.00599173	0.0532493	-4.23109	down	1.27484	0.00132278	0.0210765	-5.56822	down	1.51312	0.0113771	0.0677707	-3.88319
Smnp004072	449.14	269.08	448.137	C22H24O10	[M+H]+	8-O-methyl-7-hydroxyaloin B	Quinones	Anthraquinone	-	2	0	0	0	109359	50079.6	56547.8	43035.2	20572.1	8340.54	42460.6	20564.2	101699	0	0	0	44983.9	43026.2	40289.5	-	-	-	-	-	-	-	-	-	-	-	-	1.333	0.151691	#DIV/0!	#DIV/0!	up	1.16566	0.107755	0.333113	-1.58592
WaYn003084	525.16	167.03	526.169	C24H30O13	[M-H]-	Guaiacylglycerol 8-O-(1''-O-Glucosyl)Vanillic Acid Ether*	Phenolic acids	Phenolic acids	-	2	1.37062e+06	1.07807e+06	1.22916e+06	50407.1	45298.8	79454.5	81092.2	101140	22570.7	13058.5	28904.5	22162.5	73485.2	48473.8	30843.2	241292	234829	261016	-	-	1.25711	0.181034	0.313108	-1.67527	down	1.25765	0.0567038	0.366096	-1.44971	down	1.35337	0.00478049	0.0174356	-5.84182	down	-	-	-	-
Wcop009181	295.23	81.07	294.219	C18H30O3	[M+H]+	8-(hydroxymethyl)-11b-methyltetradecahydro-6a,9-methanocyclohepta[a]naphthalene-3,8-diol	Terpenoids	Ditepenoids	-	3	116603	136428	112292	239222	165785	242323	222324	87284	126266	50696.8	34052.3	47760.5	51826.9	64105.3	44745.2	110609	105992	98975	-	-	1.55678	0.125709	0.304008	-1.71782	down	1.42134	0.0173353	0.204702	-2.28841	down	1.31564	0.00168113	0.362719	-1.46308	down	-	-	-	-
Wbkp008219	699.36	699.36	698.343	C38H46N6O7	[M+H]+	(3S,3'S)-N,N'-((1R,2R)-5-((3,4,5-trihydroxy-6-methyltetrahydro-2H-pyran-2-yl)oxy)cyclohex-3-ene-1,2-diyl)bis(2-methyl-2,3,4,9-tetrahydro-1H-pyrido[3,4-b]indole-3-carboxamide)	Alkaloids	Alkaloids	-	1	1.11402e+07	2.40212e+07	2.84489e+07	1.24533e+06	1.89086e+06	1.54477e+06	678610	728127	3.09617e+06	716151	1.0023e+06	449734	1.89705e+06	953390	578749	4.61006e+06	4.13624e+06	4.26897e+06	-	-	-	-	-	-	-	1.19862	0.0279814	0.463191	-1.11032	down	1.32008	0.0585254	0.0340854	-4.8747	down	-	-	-	-
Wcjp002059	304.15	211.1	303.147	C17H21NO4	[M+H]+	(3S,11bS,12S)-3-methoxy-2,3,4,4a-tetrahydro-1H,6H-11b,5-ethano[1,3]dioxolo[4,5-j]phenanthridin-12-ol	Alkaloids	Alkaloids	-	1	4.75761e+06	3.10999e+06	4.26281e+06	2.14528e+06	1.58856e+06	1.52181e+06	1.1376e+06	274293	1.54642e+06	2.31793e+06	680815	943963	545608	744347	460963	3.17119e+06	3.54993e+06	3.38815e+06	-	-	-	-	-	-	-	-	-	-	-	-	1.15806	0.017957	0.325027	-1.62137	down	-	-	-	-
Zasp102439	118.06	91.05	117.058	C8H7N	[M+H]+	m-Aminophenylacetylene	Alkaloids	Alkaloids	54060-30-9	1	3.00706e+07	2.87935e+07	3.005e+07	9.4604e+06	1.24302e+07	1.27992e+07	1.76321e+07	2.04771e+07	2.20307e+07	1.49779e+07	2.30662e+07	1.4602e+07	1.03968e+07	1.05632e+07	9.72158e+06	1.78057e+07	1.8206e+07	1.98266e+07	-	-	-	-	-	-	-	-	-	-	-	-	-	-	-	-	-	-	-	-	-
Hmhn007438	285.08	179.04	286.084	C16H14O5	[M-H]-	4'-Demethyl-3,9-dihydropunctatin	Flavonoids	Flavones	96911-00-1	2	2384.92	9374.55	19855.6	2868.19	3453.83	62772.4	10246.2	2605.34	2570.4	0	0	0	2483.74	5916.95	4725.53	7049.97	7869.57	7720.11	-	-	1.66155	0.181647	0	#DIV/0!	down	1.25189	0.366122	0	#DIV/0!	down	1.25831	0.17357	0	#DIV/0!	down	-	-	-	-
pmb0818	206.08	145.05	205.074	C11H11NO3	[M+H]+	Methoxyindoleacetic acid	Alkaloids	Plumerane	3471-31-6	3	2.42184e+07	2.13885e+07	2.41893e+07	4.28449e+06	6.59628e+06	6.84617e+06	1.12514e+07	1.50564e+07	1.50493e+07	9.61657e+06	1.70846e+07	8.0096e+06	5.54974e+06	5.49526e+06	5.15157e+06	1.2212e+07	1.31674e+07	1.3706e+07	C05660	ko00380	-	-	-	-	-	-	-	-	-	-	1.149	0.041354	0.497316	-1.00776	down	1.4272	0.00978667	2.33301	1.22219
Hasp010605	353.27	261.22	352.261	C21H36O4	[M+H]+	(S)-2,3-dihydroxypropyl (9Z,12Z,15Z)-octadeca-9,12,15-trienoate	Others	Others	129828-41-7	1	567450	332692	444094	669803	685137	641182	220363	110149	142299	84114.2	258527	91697	178378	144698	59181.3	320218	333423	296733	-	-	-	-	-	-	-	1.31753	0.00903209	0.217591	-2.20031	down	1.15155	0.0278936	0.323111	-1.6299	down	1.48795	0.00147431	0.236865	-2.07786
Wcsn011125	361.24	279.23	362.246	C22H34O4	[M-H]-	Ethyl (4E,6E,8E,10E,13Z)-15,16-dihydroxy-5,9-dimethyloctadeca-4,6,8,10,13-pentaenoate	Others	Others	-	1	808978	696894	713131	898852	1.23429e+06	1.09671e+06	655894	470537	771706	316740	442345	377522	320448	237001	191124	634654	704545	640452	-	-	-	-	-	-	-	1.39395	0.0110935	0.351907	-1.50674	down	-	-	-	-	-	-	-	-	-
Zmsp000758	158.12	70.07	158.117	C8H15NO2	[M+H]+	1-(Hydroxymethyl)hexahydro-1h-pyrrolizin-2-ol	Alkaloids	Pyrrole alkaloids	-	2	3.23002e+07	3.59697e+07	3.4313e+07	1.8056e+07	2.92541e+07	1.85776e+07	5.87457e+07	5.71013e+07	4.68574e+07	2.50209e+07	3.51433e+07	2.56845e+07	3.87983e+07	4.63636e+07	4.0248e+07	3.58597e+07	4.036e+07	3.82965e+07	-	-	-	-	-	-	-	-	-	-	-	-	-	-	-	-	-	1.44508	0.00345814	2.46942	1.30417
Wcjp000888	152.11	121.06	151.1	C9H13NO	[M+H]+	N-Methyltyramine	Others	Others	370-98-9	1	5.45786e+06	5.49048e+06	5.06244e+06	1.69286e+07	2.15373e+07	2.1806e+07	5.57795e+06	3.70805e+06	8.74623e+06	4.23363e+06	6.79207e+06	4.38553e+06	4.49356e+06	4.24956e+06	4.13721e+06	7.59527e+06	8.55149e+06	8.15016e+06	C02442	ko00350,ko01100	-	-	-	-	-	1.397	0.00349018	0.255695	-1.9675	down	-	-	-	-	-	1.43026	0.00291634	0.299181	-1.74091
Lhjp110307	232.1	186.09	231.089	C13H13NO3	[M+H]+	Plumerianine	Alkaloids	Pyridine alkaloids	-	2	1.66449e+06	1.71117e+06	1.62271e+06	1.77799e+06	2.14009e+06	1.83236e+06	921115	1.07644e+06	83227.4	926905	1.21498e+06	1.02462e+06	861541	979314	955397	1.40054e+06	1.53977e+06	1.38331e+06	-	-	-	-	-	-	-	-	-	-	-	-	-	-	-	-	-	1.00528	0.044962	0.361848	-1.46655
Zmsp003052	302.14	270.11	301.131	C17H19NO4	[M+H]+	Amarbellisine	Alkaloids	Isoquinoline alkaloids	-	1	9.60727e+06	8.71013e+06	9.35701e+06	147692	257466	184905	1.80191e+06	4.31203e+06	686958	176603	1.25719e+06	243975	34874.6	23005.4	20005	2.98377e+06	2.65052e+06	2.78915e+06	-	-	1.22352	0.247768	0.246698	-2.01918	down	-	-	-	-	-	1.26815	6.42867e-05	0.0606252	-4.04394	down	1.38869	0.193087	11.5257	3.52678
Zmyp010736	311.17	161.1	310.157	C20H22O3	[M+H]+	Myricarborin	Terpenoids	Ditepenoids	-	3	112503	19034	114659	249180	49263.4	180670	14614.6	64957.8	25167.9	8364.64	7006.12	8801.28	141587	237445	25339.4	92676	85747.6	82521.9	-	-	1.44224	0.221734	0.230781	-2.11541	down	1.3735	0.122663	0.0504515	-4.30896	down	1.18911	0.143355	0.098182	-3.3484	down	1.15066	0.160312	0.218612	-2.19355
Wbsp002166	290.17	272.17	289.168	C17H23NO3	[M+H]+	Lycopladine B	Alkaloids	Alkaloids	-	2	4.22419e+06	4.26256e+06	4.06946e+06	2.76071e+06	2945416	2.71419e+06	2.59261e+06	7.17182e+06	919296	1.27916e+06	1.52118e+06	1.34739e+06	1.16627e+06	1.02448e+06	1.03425e+06	3.12598e+06	2.91077e+06	2.77724e+06	-	-	-	-	-	-	-	1.42336	0.000146484	0.492586	-1.02155	down	1.35437	1.02883e-05	0.330332	-1.59801	down	-	-	-	-
MWSHC20189	357.13	151.04	358.142	C20H22O6	[M-H]-	Epipinoresinol*	Lignans and Coumarins	Lignans	24404-50-0	1	10020.4	12034.4	6100.75	7111.29	7271.13	190262	5356.95	2267.88	1800.22	1408.97	627.45	1411.8	6036.18	87524	7970.77	22661.3	23024.7	20573.5	-	-	1.31443	0.211767	0.365856	-1.45065	down	1.16874	0.386385	0.0168498	-5.89113	down	1.30154	0.0393437	0.12247	-3.0295	down	1.00847	0.397943	0.0460557	-4.44048
Lshp011006	304.15	137.06	303.147	C17H21NO4	[M+H]+	Galanthamine N-oxide*	Alkaloids	Alkaloids	199014-26-1	1	5.98129e+06	4.42916e+06	5.14755e+06	2.49922e+06	2.50231e+06	2.28966e+06	2.04153e+06	5.081e+06	7.38143e+06	1.11443e+06	1.73742e+06	1.45692e+06	1.09196e+06	1.19087e+06	756347	3.21834e+06	2.92938e+06	2.88467e+06	-	-	1.41631	0.157377	0.297075	-1.7511	down	-	-	-	-	-	1.32833	0.00699902	0.276949	-1.85231	down	-	-	-	-
MWSmce096	219.17	81.07	218.167	C15H22O	[M+H]+	Nootkatone	Terpenoids	Sesquiterpenoids	4674-50-4	2	158712	137150	75561.3	165893	92124.5	213205	228379	195302	214350	114253	129839	105570	109167	94049.6	93293.6	139804	124026	134027	C17914	-	-	-	-	-	-	-	-	-	-	-	-	-	-	-	-	-	-	-	-
Wccp007140	197.08	151.08	196.074	C10H12O4	[M+H]+	2',6'-Dimethoxy-4'-Hydroxyacetophenone*	Others	Others	13246-14-5	1	292460	76599.7	187786	6.30011e+06	7.86658e+06	1.91721e+07	1.30687e+06	241488	103138	9.07509e+06	933557	1.10191e+07	2.69959e+06	456404	68780.2	4.23875e+06	3.88962e+06	3.78134e+06	C10684	-	1.35479	0.1699	12.7325	3.67045	up	-	-	-	-	-	1.18826	0.157772	37.7622	5.23887	up	1.38139	0.119927	0.0495367	-4.33536
Zmwp001001	290.14	228.1	289.131	C16H19NO4	[M+H]+	10-methylenedioxy-galanthane-1,2-diol	Alkaloids	Isoquinoline alkaloids	-	3	3.29653e+07	2.79974e+07	2.76825e+07	4.96201e+06	4.64613e+06	5.1856e+06	1.03288e+07	6.03431e+06	7.62475e+06	1.22732e+07	9.81515e+06	1.50619e+07	1.38337e+06	1.45145e+06	1.27808e+06	1.37403e+07	1.46219e+07	1.55017e+07	-	-	-	-	-	-	-	1.38576	0.0377219	2.51121	1.32838	up	1.31218	0.00178139	0.419089	-1.25467	down	-	-	-	-
pmb0037	166.12	121.06	165.115	C10H15NO	[M+H]+	Hordenine	Alkaloids	Phenolamine	539-15-1	3	2.83232e+06	3.0549e+06	3.02765e+06	4.26491e+06	5.68778e+06	5.80776e+06	387189	1.29301e+06	2.63297e+06	360287	143527	398559	376370	377031	324263	2.08177e+06	1.87823e+06	2.0966e+06	C06199	ko00350,ko01100	1.27298	0.22214	0.209214	-2.25695	down	1.41412	0.00854713	0.0572556	-4.12644	down	1.31739	1.67344e-05	0.101221	-3.30441	down	1.24659	0.0113314	0.27367	-1.86949
Zmwp003901	314.14	254.12	313.131	C18H19NO4	[M+H]+	O-Acetylcrinine	Alkaloids	Isoquinoline alkaloids	93452-26-7	2	0	0	0	1.30531e+06	1.21693e+06	908477	375417	1.0636e+06	259192	465450	756617	411061	2.21415e+06	1.51655e+06	2.96097e+06	823444	922488	844104	-	-	-	-	-	-	-	1.24747	0.0209906	0.476031	-1.07087	down	1.36065	0.0367084	#DIV/0!	#DIV/0!	up	1.0762	0.133677	0.495	-1.0145
MWStz070	182.08	91.05	181.074	C9H11NO3	[M+H]+	N-(2-Hydroxy-4-methoxyphenyl)acetamide	Alkaloids	Phenolamine	58469-06-0	1	1.18126e+06	1.30361e+06	1.37547e+06	1.03952e+06	1.21434e+06	1.11274e+06	1.21741e+06	1.17197e+06	1.62845e+06	1.19162e+06	1.66049e+06	985469	705149	681449	506519	1.27521e+06	1.35669e+06	1.20183e+06	-	-	-	-	-	-	-	-	-	-	-	-	-	-	-	-	-	-	-	-	-
Zmsp001664	306.18	162.07	305.163	C17H23NO4	[M+H]+	Lycoramine N-oxide	Alkaloids	Alkaloids	-	3	2.23369e+06	1.46095e+06	1.73782e+06	384509	244941	329864	281380	109246	63510.3	134942	72751.5	205547	26099.1	30021.6	19000.2	474630	465234	422694	-	-	-	-	-	-	-	1.19101	0.0312679	0.430767	-1.21502	down	1.33063	0.0156428	0.0760686	-3.71656	down	1.09109	0.110423	0.473398	-1.07888
pmb3142	299.08	137.02	300.084	C13H16O8	[M-H]-	Salicylic acid-2-O-glucoside	Phenolic acids	Phenolic acids	10366-91-3	3	2.6689e+06	1.28781e+06	2.51034e+06	419874	387086	369733	459036	313472	327846	514044	246114	781934	645724	487973	326059	660770	726664	742922	-	-	-	-	-	-	-	-	-	-	-	-	1.20917	0.0510437	0.238454	-2.06822	down	-	-	-	-
Wcgp010223	277.22	93.07	276.209	C18H28O2	[M+H]+	3-(Cyclohexen-1-yl)-2-hydroxy-4a,5-dimethyl-2,3,4,5,6,7,8,8a-octahydronaphthalen-1-one*	Others	Others	-	3	659129	557364	895995	389228	184378	458254	353586	276486	1.12177e+06	147354	273801	142084	149274	353846	252601	478065	428189	433485	-	-	1.25176	0.278404	0.321512	-1.63706	down	-	-	-	-	-	1.26919	0.0223728	0.266623	-1.90713	down	-	-	-	-
mws0906	341.12	179.07	342.132	C16H22O8	[M-H]-	Coniferin	Phenolic acids	Phenolic acids	531-29-3	2	220391	229063	283915	197723	156194	227072	402581	155116	99453.4	409839	267128	521039	481699	589072	306235	243960	273317	271198	C00761	ko00940,ko01110	-	-	-	-	-	1.20072	0.0981643	2.06201	1.04405	up	-	-	-	-	-	-	-	-	-
pme2693	131.12	114.09	130.111	C6H14N2O	[M+H]+	N-Acetylputrescine	Alkaloids	Alkaloids	18233-70-0	3	338371	383803	438361	287919	320509	293089	696216	640132	595797	240889	372096	251422	612142	633499	619220	394454	433619	386484	C02714	ko00330,ko01100	1.66436	0.00343574	0.447382	-1.16042	down	-	-	-	-	-	-	-	-	-	-	1.52422	0.00351313	2.14322	1.09978
pmn001727	474.18	312.12	475.184	C24H29NO9	[M-H]-	N-(4-O-(Glucosyl)-E-feruloyl)-tyramine	Alkaloids	Phenolamine	-	2	96645.5	89006.9	38145.5	318341	84170.6	717375	72695	65279.6	16880.6	101758	10886.9	36148.7	49735.2	29931.8	16025.9	110916	113901	124762	-	-	-	-	-	-	-	1.11369	0.220116	0.132865	-2.91196	down	-	-	-	-	-	1.15428	0.223114	0.138278	-2.85436
Wcjp001791	274.14	256.13	273.137	C16H19NO3	[M+H]+	8-Demethylmaritidine	Alkaloids	Alkaloids	-	2	9.99125e+06	8.11569e+06	8.41045e+06	1.38849e+07	1.65178e+07	1.51389e+07	1.3211e+07	6.60471e+06	3.47068e+06	5.46593e+06	5.73019e+06	4.4877e+06	4.48714e+06	8.84015e+06	5.49038e+06	7.73626e+06	8.0577e+06	8.75473e+06	C12180	ko00950	-	-	-	-	-	1.42256	0.00148703	0.344384	-1.53791	down	-	-	-	-	-	-	-	-	-
Wafn005994	447.23	315.18	448.231	C21H36O10	[M-H]-	Geranyl 6-O-xylopyranosyl-glucopyranoside*	Others	Others	124044-06-0	2	151208	110637	106562	84581.8	25307.7	90970.6	6775.3	10580.2	96441.1	10870.3	17168	15410.9	1204.96	1162.09	3115.75	49368.5	51127.3	45047.9	-	-	-	-	-	-	-	1.2414	0.127649	0.216316	-2.20879	down	1.34741	0.0155895	0.117938	-3.0839	down	-	-	-	-
mws0704	140.01	78.96	141.019	C2H8NO4P	[M-H]-	O-Phosphorylethanolamine	Alkaloids	Alkaloids	1071-23-4	3	858823	927650	1.01664e+06	576594	946026	1.31125e+06	388202	499686	586458	725040	744907	581657	472821	467513	446750	889746	780665	834293	C00346	ko00563,ko00564,ko00600,ko01100	-	-	-	-	-	-	-	-	-	-	-	-	-	-	-	-	-	-	-
Sazp000955	272.11	110.06	271.106	C12H17NO6	[M+H]+	Tetraphyllin A*	Alkaloids	Isoquinoline alkaloids	-	2	2.47904e+06	1.21168e+06	1.4996e+06	205967	162579	152564	455657	1.03838e+06	189731	116995	201445	119473	125661	96910.6	77572.8	585200	666498	638064	-	-	1.31111	0.238347	0.260079	-1.94298	down	-	-	-	-	-	1.33164	0.0532375	0.0843711	-3.56711	down	1.08179	0.261745	3.23112	1.69203
Lhhp102923	327.16	137.06	326.152	C20H22O4	[M+H]+	(7'R,8'R)-7'8'-dihydro-7'-(5'-hydroxy-3'-methoxphenyl)-3-methoxy-8'-methyl-1-(E)-propenylbenzof-uran	Lignans and Coumarins	Lignans	-	2	371303	249562	251923	63600.7	12619.7	32406.6	49244.8	64650.6	22224.9	10569.6	39950.1	14839.9	64955.5	46532.2	36993	76871.3	86919.4	85588.4	-	-	1.10926	0.2068	0.480161	-1.05841	down	-	-	-	-	-	1.30196	0.0175635	0.0748861	-3.73916	down	-	-	-	-
Lshp011009	276.16	175.08	275.152	C16H21NO3	[M+H]+	N-Demethyllycoramine*	Alkaloids	Alkaloids	-	1	3.63428e+06	2.87719e+06	3.80447e+06	177265	143949	122675	3.92138e+06	5.14772e+06	3.07749e+06	517519	1.12332e+06	630963	49275.2	41942.4	24687.9	2.41235e+06	2.24456e+06	2.56055e+06	-	-	1.68056	0.0236471	0.187032	-2.41864	down	1.38364	0.0808006	5.11796	2.35557	up	1.29681	0.00255723	0.220223	-2.18296	down	1.53104	0.02286	27.364	4.77421
Lmwp102904	219.15	174.09	218.142	C13H18N2O	[M+H]+	N,N-Dimethyl-5-methoxytryptamine	Alkaloids	Plumerane	1019-45-0	3	37974.8	68222.9	46513	118413	62290.3	105861	84776	41680	86700	34273.7	32661.1	49206.9	222911	122189	58167.1	68481.6	67936.3	76280	C08309	-	-	-	-	-	-	1.29126	0.0681604	0.405291	-1.30297	down	-	-	-	-	-	-	-	-	-
MWSmce204	336.12	320.09	336.123	C20H18NO4+	[M]+	Epiberberine	Alkaloids	Isoquinoline alkaloids	6873-09-2	2	66209.3	95573	76906	45835.3	31171.2	112599	21097.6	30194.4	63168.5	30287.4	49268	16187.1	7760.12	165335	27347.8	59571.4	52582.2	58407.5	-	-	-	-	-	-	-	-	-	-	-	-	1.10584	0.0212081	0.401119	-1.3179	down	-	-	-	-
Lamp007647	257.08	137.02	256.073	C15H12O4	[M+H]+	2',4,4'-Trihydroxychalcone*	Flavonoids	Chalcones	-	1	4033.91	11454.3	2031.85	3447.28	33295.5	986925	109916	8334.64	7197.05	2690.1	2271.98	3535.55	12237.7	39728.2	21268.8	94143	83509.8	84867.5	-	-	1.29638	0.370803	0.0677384	-3.88388	down	-	-	-	-	-	-	-	-	-	-	-	-	-	-
MWSHY0037	257.08	137.02	256.074	C15H12O4	[M+H]+	Isoliquiritigenin*	Flavonoids	Chalcones	961-29-5	1	4033.91	11454.3	2031.85	3447.28	33295.5	986925	109916	8334.64	7197.05	2690.1	2271.98	3535.55	12237.7	39728.2	21268.8	94143	83509.8	84867.5	C08650	ko00941,ko01100,ko01110	1.29638	0.370803	0.0677384	-3.88388	down	-	-	-	-	-	-	-	-	-	-	-	-	-	-
Zahn002102	237.04	149.02	238.048	C11H10O6	[M-H]-	(3r,4r)-4,6-dihydroxy-3-methyl-1-oxo-3,4-dihydro-2-benzopyran-5-carboxylic acid-2	Phenolic acids	Phenolic acids	-	2	718792	614705	765398	295882	225143	259438	552830	704777	594073	690455	444200	663185	368111	330168	228556	562183	500019	504390	-	-	-	-	-	-	-	1.33444	0.0414658	2.30355	1.20386	up	-	-	-	-	-	1.49647	0.00715749	2.37254	1.24643
Lshp011013	318.14	149.06	317.126	C17H19NO5	[M+H]+	Haemanthidine	Alkaloids	Pyridine alkaloids	11002-52-1	3	1.19597e+06	1.15025e+06	1.40719e+06	7.69333e+06	5.7862e+06	5.87735e+06	1.47858e+07	8.6112e+06	2.63915e+07	7.29563e+06	4.82067e+06	8.92821e+06	67519	56478	42464.7	5.75724e+06	6.20697e+06	6.57989e+06	C12174	-	1.28069	0.20293	0.422678	-1.24237	down	-	-	-	-	-	1.32297	0.0398113	5.60677	2.48717	up	1.1878	0.189468	2.57213	1.36297
Ymsp002543	272.13	272.13	271.121	C16H17NO3	[M+H]+	Nornarwedine	Alkaloids	Alkaloids	-	2	832154	1.29971e+06	1.04131e+06	2.64846e+06	3.57737e+06	2.85031e+06	1200895	1.37085e+06	1.2795e+06	577748	1.3942e+06	788806	1.51446e+06	1.87792e+06	2.7307e+06	1.52867e+06	1.45526e+06	1.65906e+06	-	-	-	-	-	-	-	1.31314	0.00516894	0.304177	-1.71702	down	-	-	-	-	-	1.49812	0.0225276	0.424327	-1.23675
Yajn003045	443.19	59.01	444.2	C21H32O10	[M-H]-	Ebuloside	Terpenoids	Monoterpenoids	-	3	5702.31	4928.09	9302.28	5298.72	3370.64	5259.8	6915.05	8554.69	6317.39	5435.66	5820.19	5667.59	3289.66	2851.98	510.296	6249.15	6093.19	6899.98	-	-	-	-	-	-	-	-	-	-	-	-	-	-	-	-	-	-	-	-	-
Wbmp011352	701.37	701.37	700.357	C37H52N2O11	[M+H]+	Puberaconitidine	Alkaloids	Alkaloids	83685-21-6	2	1.79023e+07	6.38467e+07	5.8868e+07	3.39212e+06	7.89299e+06	1.09144e+07	2.40317e+06	2.67842e+06	6.49121e+06	3.84408e+06	4.05191e+06	1.86832e+06	9.05683e+06	3.27351e+06	2.15283e+06	1.42853e+07	1.26025e+07	1.40817e+07	-	-	-	-	-	-	-	-	-	-	-	-	1.25986	0.095322	0.069439	-3.84811	down	-	-	-	-
Wcsn010254	277.22	277.22	278.225	C18H30O2	[M-H]-	4-[3-(4,8-dimethylnona-3,7-dienyl)-3-methyloxiran-2-yl]butan-2-one	Others	Others	-	1	4.14109e+06	3.44992e+06	3.6803e+06	3.06487e+06	3.39655e+06	2.47937e+06	1.53301e+06	884553	1.40264e+06	682009	1.26985e+06	761916	690732	489184	317892	2.15395e+06	1.97998e+06	1.88412e+06	-	-	-	-	-	-	-	1.35639	0.00463082	0.303527	-1.7201	down	1.31281	0.000506515	0.240768	-2.05428	down	1.41746	0.00857957	0.427277	-1.22676
Wasn003942	363.17	201.11	364.173	C16H28O9	[M-H]-	Glucosyl 6,9-dihydroxydec-4-enoic acid	Others	Others	-	2	164078	66360	92898	36997.6	32785.1	43725.8	120834	99563.4	63060.7	83731.1	22266.7	140344	81462.4	83267.7	36237.1	66166.8	71361.6	75860.7	-	-	-	-	-	-	-	-	-	-	-	-	-	-	-	-	-	1.401	0.0736444	2.49724	1.32033
Lmtn002565	329.11	167.03	330.095	C14H18O9	[M-H]-	1-O-Vanilloyl-D-Glucose	Phenolic acids	Phenolic acids	-	1	7210.37	8486.68	7970.55	226927	323207	1.74966e+06	17946.3	30864.5	6071.09	48930.7	83420.3	44019	24284.9	13665.7	10541.4	187733	199152	215151	C20470	-	1.38062	0.0614365	3.21362	1.6842	up	1.24087	0.287055	0.0766896	-3.70483	down	1.3388	0.0543883	7.45196	2.89762	up	1.38958	0.267868	0.0238639	-5.38903
Lskp211385	357.13	307.09	356.126	C20H20O6	[M+H]+	(-)-dihydrosesamin*	Lignans and Coumarins	Lignans	-	3	40102.1	192810	6035.4	8634.65	11132.7	313384	12066.3	9157.95	6267.2	3056.95	5421.67	3015.11	7157.25	19636.3	5367.99	45660.3	40179.7	41106.5	-	-	1.50543	0.0674398	0.418083	-1.25814	down	-	-	-	-	-	1.00786	0.317598	0.0481014	-4.37778	down	-	-	-	-
Ladp002935	190.05	144.04	189.043	C10H7NO3	[M+H]+	3-quinolinecarboxylic acid	Alkaloids	Quinoline alkaloids	-	2	4.64542e+06	4.36194e+06	5.39609e+06	990166	1.42706e+06	1.62759e+06	2.48287e+06	3.39407e+06	3.28786e+06	1.92506e+06	3.56244e+06	1.97213e+06	1.14802e+06	1.05576e+06	1.1117e+06	2.4988e+06	2.65686e+06	2.87131e+06	-	-	-	-	-	-	-	-	-	-	-	-	-	-	-	-	-	1.42123	0.0112066	2.26582	1.18003
MWSmce709	130.06	103.05	129.058	C9H7N	[M+H]+	Isoquinoline	Alkaloids	Isoquinoline alkaloids	119-65-3	2	1.05512e+07	1.10752e+07	1.18053e+07	3.26454e+06	4.58093e+06	5.10882e+06	6.67161e+06	7.98049e+06	8.49964e+06	6.49337e+06	9.5786e+06	5.79251e+06	4.36914e+06	4.06709e+06	4.35046e+06	7.47881e+06	8.45634e+06	8.47941e+06	C06323	-	-	-	-	-	-	-	-	-	-	-	-	-	-	-	-	-	-	-	-
Wmln000659	193.07	101.02	194.058	C10H10O4	[M-H]-	3-Methyl-4,8-dihydroxy-3,4-dihydroisocoumarin	Lignans and Coumarins	Coumarins	33788-22-6	3	10906.7	10289.4	10292.3	9539.12	9327.84	6005.01	12447.7	8690.93	14652.8	9801.42	9630.85	14898.9	4818.58	6297.35	4039.76	9153.05	9979.06	10542.8	-	-	-	-	-	-	-	-	-	-	-	-	-	-	-	-	-	-	-	-	-
MWSHY0124	257.08	153.02	256.074	C15H12O4	[M+H]+	Pinocembrin (Dihydrochrysin)	Flavonoids	Flavanones	480-39-7	1	34662.1	556677	7430.79	7883.1	4406.17	46175.9	6.48167e+06	24192.2	40798.1	8713.63	5501.41	7220.54	19166.7	41424.9	15356.4	483057	444744	419837	C09827	ko00941	1.19787	0.418139	0.00327428	-8.25461	down	-	-	-	-	-	-	-	-	-	-	-	-	-	-
Lasp002993	487.19	325.14	486.189	C26H30O9	[M+H]+	Isobavachalcone glucoside	Flavonoids	Chalcones	-	2	121433	77241.8	107163	10493.3	16675	14262.4	40558.3	265250	196867	23004.2	15727.4	38186.1	61670.1	78955.6	22911.3	47935.2	47986.6	42300.3	-	-	1.39729	0.165184	0.153016	-2.70824	down	-	-	-	-	-	1.27604	0.014008	0.251497	-1.99138	down	1.36263	0.146828	12.1329	3.60086
HX1339	147.06	130.03	146.048	C8H6N2O	[M+H]+	4-puinazolinone	Alkaloids	Alkaloids	-	2	310271	340328	174241	80489.1	125043	206250	274152	151673	478536	166128	254648	243724	218805	236996	207099	287351	270897	311911	-	-	-	-	-	-	-	-	-	-	-	-	-	-	-	-	-	1.00999	0.220807	2.19621	1.13502
Wbjp002868	229.1	214.07	228.09	C13H12N2O2	[M+H]+	3-Methoxy-1-methyl-2,9-dihydropyrido[3,4-b]indol-7-one	Alkaloids	Alkaloids	-	2	1.51726e+06	3.55569e+06	2.01694e+06	5.45528e+06	7.05853e+06	5.62794e+06	2.602e+06	600741	290369	1.93458e+06	2.47544e+06	1.87091e+06	4.80813e+06	5.22632e+06	5.91348e+06	3.00978e+06	3.22246e+06	2.79103e+06	-	-	-	-	-	-	-	1.40313	0.00895556	0.346214	-1.53026	down	-	-	-	-	-	1.29712	0.00721313	0.192545	-2.37673
Wcqn002538	341.12	135.04	342.132	C16H22O8	[M-H]-	(2R,3R,4S,5S,6R)-2-[[(1R,2R,4R)-2,4-dihydroxy-1,2,3,4-tetrahydronaphthalen-1-yl]oxy]-6-(hydroxymethyl)oxane-3,4,5-triol	Others	Others	-	2	94232.7	53642.1	85029.9	172243	128478	129906	203938	32335.2	43166.1	41625.6	98370.4	71971	83073.5	79970.7	35122.7	77099.8	86069.7	88581.5	-	-	-	-	-	-	-	1.17358	0.0294705	0.492228	-1.0226	down	-	-	-	-	-	-	-	-	-
Zmwp003264	318.13	227.07	317.126	C17H19NO5	[M+H]+	6-Hydroxypowelline*	Alkaloids	Isoquinoline alkaloids	-	2	2.65183e+06	2.57945e+06	3.31743e+06	1.32249e+06	633022	1.16843e+06	8.16737e+06	1.46892e+07	4.61668e+06	51050.5	3.40946e+06	52462.3	40315.6	22518.3	25213.4	3.79741e+06	3.61341e+06	3.28805e+06	-	-	1.39248	0.0995356	0.127869	-2.96726	down	-	-	-	-	-	-	-	-	-	-	1.44612	0.109859	8.79445	3.13659
Wbmn009893	393.22	333.21	394.236	C22H34O6	[M-H]-	3-Acetoxy-9,13-epoxy-16-hydroxy-labda-15,16-olide	Terpenoids	Ditepenoids	-	2	94058.1	95304.3	140931	98586.4	86610.8	118713	72395.7	38142.9	43630.3	17724	20735.2	25294.3	26369.3	15962.7	20869.7	61961.9	60829.7	54064.7	-	-	1.57976	0.0993743	0.41353	-1.27394	down	1.42806	0.0102625	0.209778	-2.25307	down	1.33527	0.0268207	0.193021	-2.37317	down	-	-	-	-
MWStz322	340.15	340.15	339.147	C20H21NO4	[M+H]+	(S)-Canadine	Alkaloids	Isoquinoline alkaloids	5096-57-1	2	2.48483e+06	1.03216e+06	3.4155e+06	139227	160152	76071.5	82538	99080.7	94779.2	21891.6	67713.9	12961.4	0	0	0	707252	619057	700421	C03329	ko00950,ko01100,ko01110	1.37021	0.066047	0.371085	-1.43018	down	1.15713	0.047898	0.273184	-1.87205	down	1.30885	0.0815054	0.0147951	-6.07874	down	-	-	-	-
Lhzp110915	318.13	227.07	317.126	C17H19NO5	[M+H]+	3-O-Demethyltazettine*	Alkaloids	Pyrrole alkaloids	-	1	3.33587e+06	3.26877e+06	4.02513e+06	1.51828e+06	1.90498e+06	1.38962e+06	1.0205e+07	1.69602e+07	5.70686e+06	61097.3	7.79443e+06	41410.7	53601.8	22826.5	26383.7	4.86789e+06	4.43848e+06	4.22428e+06	-	-	1.28017	0.120146	0.240233	-2.0575	down	-	-	-	-	-	-	-	-	-	-	1.45739	0.103272	6.83002	2.77189
Lmyn000503	343.03	85.03	344.038	C13H12O11	[M-H]-	Mucic acid-1,4-lactone-2-O-gallate	Phenolic acids	Phenolic acids	-	3	88999	71449.8	92636.4	146674	84066.4	146208	86485.8	66894.3	82781.8	68765.6	52524.4	65337.7	145318	155434	131264	88973.5	77341.4	86634.7	-	-	-	-	-	-	-	1.26171	0.0855168	0.495103	-1.0142	down	-	-	-	-	-	-	-	-	-
MWSHY0062	271.1	167.04	270.089	C16H14O4	[M+H]+	2',4'-Dihydroxy-4-methoxychalcone; (E)-Cardamonin	Flavonoids	Chalcones	19309-14-9	1	19511.5	1.13131e+06	3772.54	813.556	2486.12	24642.6	1.11988e+07	18516.2	20368.9	9791.17	2740.72	3775.22	18310.4	9164.27	5509.86	904715	869299	783457	-	-	1.12415	0.421206	0.00145111	-9.42863	down	-	-	-	-	-	-	-	-	-	-	-	-	-	-
Lmbn001981	137.02	93.03	138.032	C7H6O3	[M-H]-	2,5-Dihydroxybenzaldehyde*	Others	Aldehyde compounds	1194-98-5	1	409549	512903	517128	358343	360792	375024	206792	222733	472561	578969	506574	484647	846089	835435	972067	444520	481221	415959	C05585	ko00350,ko01100	-	-	-	-	-	-	-	-	-	-	-	-	-	-	-	-	-	-	-
Zbzp007397	181.12	135.12	180.115	C11H16O2	[M+H]+	5,6,7,7a-tetrahydro-4,4,7a-trimethyl-2(4H)-benzofuranone*	Others	Others	15356-74-8	3	524267	268994	146034	417990	159876	573210	494521	437955	367936	211213	212037	158505	313857	249284	239098	347829	323511	300384	-	-	1.66906	0.0108639	0.447362	-1.16048	down	-	-	-	-	-	-	-	-	-	-	-	-	-	-
Wccp003073	318.13	227.07	317.126	C17H19NO5	[M+H]+	Ungiminorine*	Alkaloids	Alkaloids	-	1	2.98993e+06	2.67607e+06	3.27939e+06	1.31134e+06	1.64174e+06	1.083e+06	7.63109e+06	1.40307e+07	1.98946e+06	66743.5	6.75706e+06	52354.5	58329.7	31951.7	26891.8	3.75401e+06	3.72829e+06	3.28262e+06	-	-	1.1857	0.258838	0.290731	-1.78224	down	-	-	-	-	-	-	-	-	-	-	1.22653	0.200661	5.85996	2.55089
MWSmce587	183.06	165.06	182.058	C9H10O4	[M+H]+	2,6-Dimethoxybenzoic acid	Phenolic acids	Phenolic acids	1466-76-8	2	120954	27656.7	38965.9	312124	430044	682785	529406	42065.1	23340	993218	426858	677469	63796	20625.2	5756.66	309957	268552	280685	-	-	1.27591	0.0980106	3.5264	1.8182	up	-	-	-	-	-	1.25387	0.0561981	11.1824	3.48315	up	1.00782	0.246008	0.417425	-1.26041
Wbjp002330	221.09	175.09	220.085	C11H12N2O3	[M+H]+	(3S)-1,3-dihydroxy-2,3,3a,4-tetrahydropyrrolo[2,1-b]quinazolin-9(1H)-one	Alkaloids	Alkaloids	-	2	6.05685e+06	7.27461e+06	6.13118e+06	2.75763e+06	1.98056e+06	3.78007e+06	5.40996e+06	3.19277e+06	8.94836e+06	5.90758e+06	7.53041e+06	4.96062e+06	4.41512e+06	4.38279e+06	4.0375e+06	5.65699e+06	6.37763e+06	6.51594e+06	-	-	-	-	-	-	-	1.25523	0.0275161	2.1599	1.11097	up	-	-	-	-	-	1.05148	0.207875	2.06041	1.04293
Wcsp002246	344.13	147.04	343.121	C22H17NO3	[M+H]+	N-Phenylethylcrinasiadine	Alkaloids	Alkaloids	-	1	168883	176780	322035	28055.9	31870	46680	97364.9	82827.5	77437.6	184731	199129	222720	95296	95234.4	138603	100818	100601	114384	-	-	1.71423	0.00244389	2.35446	1.2354	up	1.42168	0.000924424	5.68993	2.50841	up	-	-	-	-	-	1.4512	0.00363757	2.41666	1.27301
Lmhp003013	279.17	177.05	278.163	C15H22N2O3	[M+H]+	N-Feruloyl-Cadaverine	Alkaloids	Phenolamine	-	3	51746	48375.2	63162.6	25761.8	33340	15973	30946	41904.5	57950.1	57370.1	23958	62658.1	23633.8	30681.3	13340	40863.1	35428.9	36522	-	-	-	-	-	-	-	-	-	-	-	-	-	-	-	-	-	-	-	-	-
mws0620	175.12	144.08	174.116	C11H14N2	[M+H]+	N-Methyltryptamine	Alkaloids	Plumerane	61-49-4	3	1.6974e+06	944031	1.44989e+06	237081	274865	264345	229341	288738	258952	151132	71865.2	239426	254781	210891	149584	525400	484060	564352	C06213	ko00380,ko01100	-	-	-	-	-	-	-	-	-	-	1.2982	0.027396	0.113025	-3.14528	down	-	-	-	-
pmb1754	184.07	125	184.073	C5H15NO4P+	[M]+	O-Phosphocholine	Alkaloids	Alkaloids	107-73-3	3	5.50822e+07	8.39394e+07	8.62399e+07	2.87038e+07	5.67935e+07	7.24509e+07	2.68225e+07	2.08709e+07	1.52844e+07	4.59765e+07	3.5965e+07	3.08131e+07	2.34327e+07	2.98694e+07	2.96811e+07	5.46709e+07	4.7597e+07	4.84317e+07	C00588	ko00564,ko01100	-	-	-	-	-	-	-	-	-	-	-	-	-	-	-	1.22588	0.124001	0.398725	-1.32653
Wccp003031	316.15	211.08	315.147	C18H21NO4	[M+H]+	1-O-Acetylnorpluviine	Alkaloids	Alkaloids	-	1	5.89106e+07	4.13653e+07	5.26342e+07	2.15596e+06	1.59701e+06	2.05775e+06	1.43398e+06	1.27101e+06	204356	188453	1.15374e+06	228716	41198.2	19295.1	20305.7	1.52934e+07	1.5493e+07	1.34263e+07	-	-	-	-	-	-	-	1.17262	0.0276065	0.270347	-1.88712	down	1.32258	0.00998161	0.0102734	-6.60494	down	-	-	-	-
HJN003	385.11	223.06	386.121	C17H22O10	[M-H]-	1-O-Sinapoyl-β-D-glucose	Phenolic acids	Phenolic acids	-	2	132126	59620.8	129087	39133.8	31356.3	48047.5	148908	179589	313534	131347	238696	246992	223486	208271	130260	121770	132458	142268	C01175	ko00940,ko01110	-	-	-	-	-	1.38737	0.0446831	5.20539	2.38001	up	-	-	-	-	-	1.46774	0.07334	5.41627	2.4373
HJKP000649	136.07	91.05	135.068	C8H9NO	[M+H]+	N-benzylformamide*	Alkaloids	Alkaloids	6343-54-0	1	1.44211e+06	1.48693e+06	1.79713e+06	1.22553e+06	1.5189e+06	1.64772e+06	1.21506e+06	1.38453e+06	1.88532e+06	1.42339e+06	1.983e+06	1227243	733490	792426	756526	1.76192e+06	1.76283e+06	1.53554e+06	C15561	-	-	-	-	-	-	-	-	-	-	-	-	-	-	-	-	-	-	-	-
Cmsp002664	302.17	270.15	301.168	C18H23NO3	[M+H]+	Cephalezomine M	Alkaloids	Isoquinoline alkaloids	462075-60-1	2	177822	270260	240278	2.59565e+07	2.56027e+07	2.47451e+07	2.24798e+07	3.78294e+06	1.0584e+07	4.4594e+07	5.10688e+06	5.5636e+07	158961	124794	70124.1	1.52013e+07	1.51201e+07	1.32077e+07	-	-	-	-	-	-	-	-	-	-	-	-	1.28742	0.150787	153.026	7.25763	up	1.06596	0.137185	0.482892	-1.05023
Lmmp007480	257.08	137.02	256.074	C15H12O4	[M+H]+	2,4,4'-trihydroxychalcone*	Flavonoids	Chalcones	-	1	4910.19	8083.9	1561.14	6240.15	35740.5	997692	102822	7098.68	5917.37	5751.39	1562.03	3203.42	9205.54	36073.6	21179.7	91883.1	86531.4	78608.4	-	-	1.13186	0.388319	0.0907895	-3.46133	down	1.01601	0.402658	0.0101155	-6.62729	down	-	-	-	-	-	-	-	-	-
Saln000499	683.22	341.11	684.226	C31H40O17	[M-H]-	7-O-(4''-O-glucosyl)coumaroyl-loganic acid	Terpenoids	Monoterpenoids	-	3	1.6663e+07	2.09471e+07	2.24758e+07	2.82054e+07	1.97064e+07	2.81207e+07	1.44772e+07	15628674	8.12325e+06	7.64337e+06	8.66484e+06	1.61289e+07	2.76545e+07	4.05606e+07	2.34655e+07	1.3023e+07	1.38083e+07	1.51814e+07	-	-	-	-	-	-	-	1.26154	0.0202267	0.426621	-1.22897	down	-	-	-	-	-	-	-	-	-
pmp000724	166.12	121.06	165.115	C10H15NO	[M+H]+	Pseudoephedrine	Alkaloids	Alkaloids	90-82-4	3	2.77802e+06	3.07063e+06	2.89398e+06	4.46351e+06	5.99137e+06	5.45514e+06	390580	1.25471e+06	2.62208e+06	239496	124854	428597	360369	383201	358030	2.01016e+06	1.80547e+06	2.10745e+06	C02765	ko00996,ko01100	1.33046	0.214835	0.185816	-2.42805	down	1.41176	0.0061706	0.0498395	-4.32657	down	1.31632	2.76312e-05	0.0906989	-3.46277	down	1.25856	0.0107223	0.268219	-1.89852
pmc1990	299.09	119.05	300.1	C17H16O5	[M-H]-	4'-Hydroxy-5,7-dimethoxyflavanone	Flavonoids	Flavanones	-	3	39473	645634	4982.9	50988.9	12452.2	464785	367580	3641.14	3312.22	1887.37	15354.9	6314.61	133468	45393.3	29095	112643	127407	130880	-	-	-	-	-	-	-	1.03731	0.365177	0.0445961	-4.48694	down	-	-	-	-	-	-	-	-	-
Wbmp008021	478.28	337.27	477.273	C26H39NO7	[M+H]+	(14-Ethyl-4,6,19-trimethoxy-9,11-dioxa-14-azaheptacyclo[10.7.2.12,5.01,13.03,8.08,12.016,20]docosan-21-yl)acetate	Alkaloids	Alkaloids	-	2	3.05065e+07	1.89543e+07	1.77882e+07	3.73803e+06	3.56169e+06	8.95153e+06	2.76579e+06	5.14716e+06	1.85456e+06	2.72137e+06	2.77382e+06	3.77711e+06	5.16806e+06	2.61877e+06	2.16389e+06	7.74086e+06	6.62482e+06	7.09465e+06	-	-	-	-	-	-	-	-	-	-	-	-	1.34249	0.0405342	0.13788	-2.85851	down	-	-	-	-
Yaln008277	393.22	311.22	394.236	C22H34O6	[M-H]-	Trijugin A	Terpenoids	Sesquiterpenoids	-	3	110509	165192	154771	81361.3	223186	67024.2	198570	113604	279287	58344.1	56757.1	85615.9	44811.9	53047.3	37056.7	101439	116362	102330	-	-	1.53562	0.107507	0.339358	-1.55912	down	-	-	-	-	-	1.22928	0.0259559	0.466273	-1.10075	down	-	-	-	-
Wcop008480	181.12	135.12	180.115	C11H16O2	[M+H]+	2,5-dimethyl-2,3,3a,7a-tetrahydro-1H-indene-1,3-diol*	Terpenoids	Sesquiterpenoids	-	3	561991	287777	172880	429792	155798	562908	498600	485904	412742	210614	237484	156005	319997	260424	256147	336504	316992	287544	-	-	1.66604	0.00190193	0.432353	-1.20972	down	-	-	-	-	-	-	-	-	-	-	-	-	-	-
Wbmn011269	377.23	295.23	378.241	C22H34O5	[M-H]-	Vitexilactone*	Terpenoids	Ditepenoids	61263-49-8	1	1.12275e+06	1.21841e+06	1.47889e+06	1.42669e+06	2.26618e+06	1.22689e+06	867760	376169	1.61864e+06	337242	375188	427464	330935	410849	242340	828574	944636	824600	-	-	1.1695	0.252502	0.398207	-1.32841	down	1.3877	0.0574167	0.231697	-2.10969	down	1.34109	0.0104205	0.298398	-1.74469	down	-	-	-	-
Yalp003420	163.07	103.05	162.068	C10H10O2	[M+H]+	2-(furan-2-ylmethyl)-5-methylfuran	Others	Others	13678-51-8	1	713297	608704	718702	94942	108380	357169	241316	115050	79129.6	55161.5	155090	58550.9	304763	237681	92161.7	180034	206717	181266	-	-	-	-	-	-	-	-	-	-	-	-	1.29438	0.000273486	0.13172	-2.92445	down	-	-	-	-
Wbmn010746	377.23	295.23	378.241	C22H34O5	[M-H]-	Negundoin A*	Terpenoids	Ditepenoids	-	1	1.00988e+06	1.11371e+06	1.45872e+06	1.39404e+06	2.22021e+06	1.12613e+06	818480	359617	1.48998e+06	352458	339497	408997	294360	400094	216639	744172	873686	792729	-	-	1.16057	0.252158	0.412639	-1.27705	down	1.3818	0.0658173	0.23225	-2.10625	down	1.33152	0.0235823	0.307331	-1.70214	down	-	-	-	-
Zmdn006929	255.07	213.06	256.074	C15H12O4	[M-H]-	Aloe-Emodin-9-Anthrone	Quinones	Anthraquinone	6247-99-0	2	4575.4	65303.9	1981.54	945.726	585.166	6895.38	777198	2927.55	4606.12	0	0	0	2665.55	5625.49	1898.2	67057.5	57165.8	64514.5	C16760	-	1.3545	0.417068	0	#DIV/0!	down	1.08784	0.303469	0	#DIV/0!	down	1.13611	0.366524	0	#DIV/0!	down	-	-	-	-
Lmgp000659	136.08	91.05	135.068	C8H9NO	[M+H]+	2-Phenylacetamide*	Alkaloids	Alkaloids	103-81-1	1	1.61963e+06	1.90951e+06	1.70287e+06	1.29378e+06	1.52786e+06	1.71777e+06	1.29825e+06	1.47292e+06	2.05508e+06	1.55962e+06	1.99839e+06	1.30559e+06	765999	881133	778434	1.75177e+06	1.77251e+06	1.5233e+06	C02505	ko00360,ko01100	-	-	-	-	-	-	-	-	-	-	-	-	-	-	-	-	-	-	-
Lmtp004688	706.45	706.45	705.445	C39H63O10N	[M+H]+	β-Chaconine	Alkaloids	Steroid alkaloids	472-51-5	2	2.22121e+06	2.17478e+06	2.19717e+06	480137	1.68986e+06	749156	3.20892e+06	1.95063e+06	1.83609e+06	1.83566e+06	1.72042e+06	1.55994e+06	5.34247e+06	3.38287e+06	3.04155e+06	2.23657e+06	2.20401e+06	1.91944e+06	-	-	-	-	-	-	-	-	-	-	-	-	-	-	-	-	-	1.18451	0.0786567	2.39646	1.26091
Lshp011109	332.15	272.13	331.142	C18H21NO5	[M+H]+	2a-hydroxy-6-O-methoxyloduline[(5a,7a)-7-methoxy-1-methyl-9,10-[methylenebis(oxy)]-1ycorenan-5-ol]*	Alkaloids	Pyrrole alkaloids	-	1	1.26888e+06	1.1138e+06	1.43047e+06	1.23962e+06	1.22673e+06	1.05229e+06	2.25102e+06	1.25585e+07	8.75164e+06	1.82693e+06	2.25515e+06	2.09912e+06	2.42517e+06	2.0371e+06	1.55452e+06	2.80489e+06	3.06379e+06	2.59859e+06	-	-	1.27266	0.19388	0.262347	-1.93045	down	-	-	-	-	-	-	-	-	-	-	1.30739	0.156526	6.6961	2.74332
Wbmp010456	277.22	93.07	276.209	C18H28O2	[M+H]+	Macrophypene B*	Terpenoids	Ditepenoids	-	3	631049	555124	786255	616635	484775	450014	324779	261224	1.12068e+06	126450	267488	133945	125251	329998	227724	472865	446582	400487	-	-	1.23292	0.289939	0.309304	-1.6929	down	1.30799	0.00774839	0.340257	-1.5553	down	1.26739	0.00629003	0.267631	-1.90168	down	-	-	-	-
Wcdp000970	121.06	103.05	120.058	C8H8O	[M+H]+	acetophenone	Others	Others	98-86-2	2	1.58526e+06	2.00956e+06	2.09731e+06	1.49964e+06	1.80098e+06	1.84075e+06	1.15218e+06	363465	287982	1.5609e+06	807977	1.14902e+06	2.69598e+06	2.02824e+06	2.74714e+06	1.56872e+06	1.68622e+06	1.42332e+06	C07113	-	-	-	-	-	-	-	-	-	-	-	-	-	-	-	-	1.25815	0.0423265	0.350808	-1.51125
pme1261	206.14	76.08	205.131	C9H19NO4	[M+H]+	D-Panthenol	Others	Alcohol compounds	81-13-0	3	84968.1	56134.6	73500.8	159148	88087.4	147896	99782.7	57836.8	687128	37631.1	112214	39573	57781.3	120708	535527	41513.7	49018.1	46944.9	C05944	ko00770	-	-	-	-	-	1.04074	0.10703	0.47938	-1.06076	down	-	-	-	-	-	-	-	-	-
pmb0629	463.12	313.07	462.116	C22H22O11	[M+H]+	Chrysoeriol-6-C-glucoside (Isoscoparin)	Flavonoids	Flavones	20013-23-4	3	20130.7	36138.7	21450.3	27148.7	47118.8	66685	77145.3	25819	39811.8	71636	39493	111332	59856.5	47781.8	152398	38395.9	45508.5	42078.4	C05990	-	-	-	-	-	-	-	-	-	-	-	1.10792	0.139018	2.86236	1.5172	up	-	-	-	-
Wchn003509	359.1	239.06	360.106	C15H20O10	[M-H]-	Syringoyl-D-Glucose	Phenolic acids	Phenolic acids	-	2	372337	335741	496900	378867	299607	339706	469895	625764	1.00296e+06	1.36559e+06	869778	1.10908e+06	890144	809346	524267	589619	699093	649776	-	-	-	-	-	-	-	1.3962	0.0298053	3.28473	1.71578	up	1.28652	0.0278224	2.77553	1.47276	up	1.26195	0.147987	2.06115	1.04345
Wafn002874	515.14	323.08	516.148	C22H28O14	[M-H]-	4-O-(4'-O-alpha-D-Glucopyranosyl)caffeoylquinic acid	Phenolic acids	Phenolic acids	1401352-62-2	3	31911.7	10642.4	22623.2	4756.87	5324.2	6710.95	14478.5	12395.5	14724.5	7972.55	4466.82	6712.53	12719.6	17324.4	8561.62	9169	10620.8	10713.4	-	-	1.59378	0.00547977	0.460399	-1.11904	down	-	-	-	-	-	1.16602	0.126651	0.293843	-1.76688	down	1.49447	0.00117341	2.47728	1.30876
Wcdn006883	357.13	151.04	358.142	C20H22O6	[M-H]-	epipinoresinol*	Lignans and Coumarins	Lignans	18779-41-4	1	8781.22	13509.2	4726.81	10919.3	7117.51	212602	5374.89	5084.14	946.785	4029.92	2563.61	1067.97	6416.93	101625	6297.46	20351.4	21551	24030	-	-	-	-	-	-	-	1.0693	0.387741	0.0332185	-4.91187	down	1.07042	0.114406	0.283578	-1.81818	down	1.00115	0.39423	0.0494531	-4.3378
Hmbp001276	169.05	65.03	168.042	C8H8O4	[M+H]+	Gallacetophenone	Phenolic acids	Phenolic acids	528-21-2	2	1.46312e+06	931005	1.08093e+06	945359	840979	1.24605e+06	549720	701560	467072	1.11252e+06	271008	1.25246e+06	6.43642e+06	5.99172e+06	3.19311e+06	1.33084e+06	1.14491e+06	1.15916e+06	-	-	-	-	-	-	-	-	-	-	-	-	-	-	-	-	-	-	-	-	-
Zajp000573	144.1	84.08	143.095	C7H13NO2	[M+H]+	N-(4-oxopentyl)-acetamide	Alkaloids	Alkaloids	-	3	755986	352114	547155	2.12636e+06	2.00676e+06	1.74472e+06	1.79165e+06	2.58875e+06	2.25863e+06	1.54829e+06	2.43068e+06	1.60424e+06	968017	682280	756311	1.36043e+06	1.5675e+06	1.35237e+06	-	-	-	-	-	-	-	-	-	-	-	-	1.24484	0.0304738	3.37302	1.75404	up	-	-	-	-
pmp001229	209.12	125.06	208.11	C12H16O3	[M+H]+	Senkyunolide K	Others	Lactones	114569-33-4	1	281201	147568	100050	275105	118766	350012	339764	267617	269099	117735	90405.2	87527.9	183075	157495	147092	202238	192102	170691	-	-	1.70912	0.00745384	0.337337	-1.56774	down	1.14211	0.157121	0.397467	-1.33109	down	-	-	-	-	-	-	-	-	-
Lmsp003655	521.2	131.05	520.194	C26H32O11	[M+H]+	Dehydrodiconiferyl alcohol-gamma'-O-glucoside*	Lignans and Coumarins	Lignans	-	1	1.44937e+06	3.36511e+06	425661	1.01436e+06	653989	7.89953e+06	1.95693e+06	312391	234632	269383	329306	348791	3.66665e+06	1.9376e+06	881980	1.08608e+06	1.20569e+06	1.28984e+06	-	-	-	-	-	-	-	1.08682	0.347133	0.0990271	-3.33603	down	1.02878	0.238533	0.180812	-2.46744	down	-	-	-	-
Wcdp009119	279.23	81.07	278.225	C18H30O2	[M+H]+	Elaidolinolenic acid	Phenolic acids	Phenolic acids	28290-79-1	2	143797	107002	114353	148335	170564	919533	631180	530059	443991	177404	189456	157361	104939	2.04306e+06	1.31537e+06	1.11225e+06	968365	955688	-	-	1.72262	0.0193241	0.32657	-1.61453	down	-	-	-	-	-	-	-	-	-	-	-	-	-	-
MWStz073	102.05	84.05	101.048	C4H7NO2	[M+H]+	5-Hydroxy-2-pyrrolidinone	Alkaloids	Pyrrole alkaloids	62312-55-4	3	105333	100012	71175.5	421830	459229	453303	246231	92941	230082	227393	268671	234821	303631	339050	353809	306084	269185	260952	-	-	-	-	-	-	-	-	-	-	-	-	1.31196	0.000915449	2.64315	1.40226	up	1.29058	0.0289365	0.426612	-1.229
MW0139629	285.08	119.05	286.084	C16H14O5	[M-H]-	Sakuranetin	Flavonoids	Flavanones	2957-21-3	3	20560.9	85204.8	3895.17	28172.9	31185.3	763483	115468	3357.65	3696.82	632.576	6005.13	702.09	25465	58992.8	30746.8	78024.7	68714.2	81395.9	C09833	ko00941,ko01110	1.08203	0.411683	0.0599056	-4.06117	down	1.22305	0.382123	0.00892006	-6.80873	down	1.01038	0.302543	0.0669317	-3.90117	down	-	-	-	-
Wbmn00859	383.08	191.06	384.084	C20H16O8	[M-H]-	vitelignin A	Lignans and Coumarins	Lignans	-	1	58654.5	69606.3	58452.6	4557.41	7163.53	8130.17	5741.83	15915.9	14505.3	76164.3	25965.4	37601.9	9513.21	41488	55814.3	55050.9	47048.3	48134.5	-	-	1.48017	0.145483	3.86393	1.95007	up	1.34636	0.11824	7.03898	2.81537	up	-	-	-	-	-	-	-	-	-
Hmqp002567	284.13	147.04	283.121	C17H17NO3	[M+H]+	4-Hydroxycinnamic acid p-hydroxyphenethylamine*	Phenolic acids	Phenolic acids	-	2	27180.5	42777.9	38181.6	1386.47	2620.86	49277.3	6218.93	7745.78	5992.72	6975.01	2656.71	15305.4	4452.25	5621.78	1615.84	13501.7	13037	15330	-	-	-	-	-	-	-	-	-	-	-	-	1.16448	0.0105876	0.2306	-2.11653	down	-	-	-	-
Zmwp005562	284.13	147.04	283.121	C17H17NO3	[M+H]+	cis-N-p-Coumaroyltyramine*	Alkaloids	Phenolamine	-	2	27180.5	42777.9	38181.6	1386.47	2620.86	49277.3	6218.93	7745.78	5992.72	6975.01	2656.71	15305.4	4452.25	5621.78	1615.84	13501.7	13037	15330	-	-	-	-	-	-	-	-	-	-	-	-	1.16448	0.0105876	0.2306	-2.11653	down	-	-	-	-
Zmhn000892	301.09	139.05	302.1	C13H18O8	[M-H]-	4-O-Glucosyl-3,4-dihydroxybenzyl alcohol	Phenolic acids	Phenolic acids	-	1	5.3494e+06	2.7057e+06	4.79589e+06	1.03558e+06	1.0853e+06	939731	1.59113e+06	3.70562e+06	3.65568e+06	1.90453e+06	1.16589e+06	3.76721e+06	1.93332e+06	1.4649e+06	1.51794e+06	2.04954e+06	2.32422e+06	2.43194e+06	-	-	-	-	-	-	-	1.01586	0.245069	2.23407	1.15968	up	-	-	-	-	-	1.34126	0.105617	2.92505	1.54846
Zmwp002913	332.15	272.13	331.142	C18H21NO5	[M+H]+	Undulatine*	Alkaloids	Isoquinoline alkaloids	6882-09-3	1	871641	772438	982968	823984	890306	773228	1.80786e+06	9.44521e+06	5.4881e+06	1.34812e+06	1.45506e+06	1.57095e+06	1.63116e+06	1.44494e+06	1.30819e+06	2.21758e+06	2.03381e+06	1.86293e+06	-	-	1.32852	0.202409	0.261279	-1.93634	down	-	-	-	-	-	-	-	-	-	-	1.33996	0.163972	6.73007	2.75062
Wcsp003033	332.15	225.09	331.142	C18H21NO5	[M+H]+	11-Hydroxy-3,4-dihydro-3-methoxygraciline*	Alkaloids	Alkaloids	-	1	5.72496e+06	5.10935e+06	6.10765e+06	2.57202e+06	1.98494e+06	2.04921e+06	137615	207861	126815	18035.2	280603	10741	46990.9	33435.6	16403.2	2.12329e+06	2.1649e+06	1.83625e+06	-	-	-	-	-	-	-	1.28428	0.00244434	0.0468318	-4.41637	down	1.25419	0.00132815	0.0182611	-5.77508	down	1.52416	0.00730513	0.0714924	-3.80607
Wccp003403	294.1	202.05	293.09	C14H15NO6	[M+H]+	2,3,4-trihydroxy-2,3,4,4a,5,11b-hexahydro-1H-[1,3]dioxolo[4,5-j]phenanthridin-6-one	Alkaloids	Alkaloids	-	2	2.64547e+07	1.99e+07	2.59457e+07	1.23909e+07	1.10667e+07	1.12667e+07	2.64471e+07	14724585	2.8642e+07	1.32378e+07	4.17516e+06	2.16091e+07	7.41561e+06	6.98096e+06	1.00294e+07	15330798	1.33395e+07	1.31097e+07	-	-	-	-	-	-	-	-	-	-	-	-	-	-	-	-	-	1.27761	0.112335	2.01051	1.00756
Wcdp010708	263.24	81.07	262.23	C18H30O	[M+H]+	Octadeca-2,9,12,15-tetraen-1-ol	Others	Others	-	1	1.15376e+07	8.80703e+06	8.92617e+06	1.22921e+07	1.23474e+07	1.01333e+07	6.32276e+06	2.08823e+06	4.02032e+06	3.60429e+06	5.56094e+06	2.20135e+06	4.05633e+06	1.88774e+06	2.72098e+06	7.33515e+06	6.24229e+06	6.40609e+06	-	-	-	-	-	-	-	1.30259	0.00393455	0.326882	-1.61316	down	1.18025	0.0108504	0.388325	-1.36467	down	1.33984	0.0110275	0.357501	-1.48398
Lcyn000106	551.18	193.05	552.184	C26H32O13	[M-H]-	Dichotomoside A	Lignans and Coumarins	Lignans	-	1	1.19846e+06	1.81299e+06	1.0885e+06	360055	362322	612549	615321	745191	141177	390605	381301	579179	798048	356251	259915	630181	659984	746168	-	-	-	-	-	-	-	-	-	-	-	-	1.27657	0.0465168	0.329538	-1.60148	down	-	-	-	-
MWS1872	225.05	105.03	224.047	C14H8O3	[M+H]+	1-Hydroxyanthraquinone	Quinones	Anthraquinone	129-43-1	2	98592.8	116440	70521.9	133477	89104.9	136008	153419	138092	144044	75985.3	93934.8	83430.6	70536.3	70095	63246.7	108562	99532.8	90762.3	C02980	-	-	-	-	-	-	-	-	-	-	-	-	-	-	-	-	-	-	-	-
Zmsp002927	318.14	286.11	317.126	C17H19NO5	[M+H]+	6β-Hydroxycrinamine	Alkaloids	Isoquinoline alkaloids	-	1	4.70779e+06	3.84488e+06	5.57831e+06	2.12674e+06	2.50531e+06	2.01465e+06	1.31662e+07	2.39285e+07	8.31632e+06	170992	1.09449e+07	136034	76634.5	63843.7	28918.1	6.29528e+06	6.14103e+06	5.31051e+06	-	-	1.28274	0.127676	0.24778	-2.01287	down	-	-	-	-	-	-	-	-	-	-	1.46504	0.107182	6.83212	2.77233
Lacn005311	533.17	371.11	534.174	C26H30O12	[M-H]-	Phellatin	Flavonoids	Flavonols	-	2	125812	125851	80544.4	15122.6	3817.14	7572.72	151143	181987	37207.1	60808	13430.3	74047.3	39315.9	22285.7	7556.58	57913.7	68633.2	67027.6	-	-	-	-	-	-	-	1.09948	0.154281	5.59305	2.48363	up	-	-	-	-	-	1.38646	0.120499	13.9684	3.8041
MWSmce461	102.05	56.05	101.048	C4H7NO2	[M+H]+	L-Azetidine-2-carboxylic acid*	Alkaloids	Alkaloids	2133-34-8	3	1.33002e+06	1.61942e+06	1.10422e+06	4.26055e+06	4.24049e+06	4.22927e+06	1.98266e+06	774053	3.47672e+06	2.39244e+06	2.09894e+06	1.90859e+06	2.79338e+06	2.65802e+06	3.15295e+06	2.72105e+06	2.64809e+06	2.29054e+06	-	-	-	-	-	-	-	-	-	-	-	-	-	-	-	-	-	1.11508	0.109301	0.489653	-1.03017
MWSmce331	102.05	56.05	101.048	C4H7NO2	[M+H]+	Azetidine-2-carboxylic acid*	Alkaloids	Alkaloids	2517-04-6	3	1.33002e+06	1.61942e+06	1.10422e+06	4.26055e+06	4.24049e+06	4.22927e+06	1.98266e+06	774053	3.47672e+06	2.39244e+06	2.09894e+06	1.90859e+06	2.79338e+06	2.65802e+06	3.15295e+06	2.72105e+06	2.64809e+06	2.29054e+06	C08267	-	-	-	-	-	-	-	-	-	-	-	-	-	-	-	-	1.11508	0.109301	0.489653	-1.03017
MWSmce294	209.11	153.05	208.11	C12H16O3	[M+H]+	Elemicin	Phenolic acids	Phenolic acids	487-11-6	1	1.179e+06	547275	410843	1.12102e+06	531285	1.42767e+06	1.44572e+06	1.1154e+06	1.04998e+06	455212	424364	368180	713001	544697	615262	821288	769866	684669	C10451	-	1.7148	0.019747	0.345534	-1.5331	down	1.18329	0.144698	0.405118	-1.30358	down	-	-	-	-	-	-	-	-	-
Wccp003665	316.12	137.06	315.111	C17H17NO5	[M+H]+	3-O-Demethyl Macronine	Alkaloids	Alkaloids	-	2	1.12612e+06	2.58475e+06	1.5967e+06	161332	288725	218442	197729	530237	352700	85423.5	184316	129123	256847	256691	192380	652674	730432	610630	-	-	1.41496	0.132314	0.36909	-1.43796	down	-	-	-	-	-	1.31347	0.0619809	0.0751498	-3.73409	down	-	-	-	-
mws0749	137.02	93.03	138.032	C7H6O3	[M-H]-	4-Hydroxybenzoic acid	Phenolic acids	Phenolic acids	99-96-7	2	613635	692633	603573	336406	456051	523069	505523	512644	580878	659238	631126	775275	1.12762e+06	999152	1.17308e+06	552216	658657	639366	C00156	ko00130,ko00790,ko01100,ko01110,ko01240	-	-	-	-	-	-	-	-	-	-	-	-	-	-	-	-	-	-	-
Hmtn001120	315.11	153.06	316.116	C14H20O8	[M-H]-	5-(2-Hydroxyethyl)-2-O-glucosylphenol*	Phenolic acids	Phenolic acids	-	2	196823	76035.8	171390	127582	96724.2	118331	183309	416203	219795	183405	121859	250508	155111	144411	120861	139177	164174	164789	-	-	-	-	-	-	-	-	-	-	-	-	-	-	-	-	-	1.30518	0.157158	2.39118	1.25772
pmp000383	419.13	257.08	418.126	C21H22O9	[M+H]+	Liquiritigenin-4'-O-Glucoside (Liquiritin)*	Flavonoids	Flavanones	551-15-5	1	644928	390664	475762	1.74157e+06	1.46143e+06	1.83852e+06	207054	188813	12920	389984	90295	638486	152889	231977	175702	581757	604947	503502	C16989	-	-	-	-	-	-	1.21952	0.00364064	0.22191	-2.17195	down	-	-	-	-	-	1.30799	0.00106774	0.0810841	-3.62444
pmn001420	341.09	179.04	342.095	C15H18O9	[M-H]-	1-O-Caffeoyl-β-D-glucose*	Phenolic acids	Phenolic acids	14364-08-0	1	2.158e+06	4.49866e+06	2.81148e+06	1.18337e+06	1.72227e+06	1.99054e+06	4.63567e+06	2.76363e+06	1.25818e+06	6.60992e+06	7.18914e+06	8.51887e+06	5.71752e+06	8.19864e+06	6.53916e+06	3.57817e+06	4.30002e+06	3.81092e+06	C10433	-	1.41204	0.0241782	2.57788	1.36618	up	1.41346	0.00387702	4.55823	2.18847	up	1.22376	0.00978704	2.35716	1.23705	up	-	-	-	-
pme1002	138.09	103.05	137.084	C8H11NO	[M+H]+	L-Tyramine	Alkaloids	Alkaloids	51-67-2	1	1.66868e+07	2.18222e+07	2.33387e+07	1.83633e+07	2.32607e+07	2.38888e+07	1.40939e+07	4.10383e+06	3.04212e+06	1.98028e+07	1.03256e+07	1.38164e+07	3.70175e+07	2.94077e+07	3.41438e+07	1.66399e+07	1.96643e+07	1.68676e+07	C00483	ko00350,ko00950,ko01100,ko01110,ko01240	1.18558	0.170226	2.06898	1.04892	up	-	-	-	-	-	-	-	-	-	-	1.25461	0.0343935	0.324209	-1.625
Lmqp003022	161.06	133.07	160.052	C10H8O2	[M+H]+	2,3-Dihydro-1,4-naphthoquinone	Quinones	Quinones	21545-31-3	1	1.0322e+06	931150	1.16223e+06	600984	36527.1	464786	1.35372e+06	1.74449e+06	2.07606e+06	2186088	1.2045e+06	2.10054e+06	671259	548456	364571	904582	1.04992e+06	883194	-	-	-	-	-	-	-	1.0677	0.0249796	4.98154	2.31659	up	-	-	-	-	-	1.15808	0.00808421	4.69408	2.23084
MWSmce284	155.07	95.05	154.063	C8H10O3	[M+H]+	3,4-Dimethoxyphenol	Phenolic acids	Phenolic acids	2033-89-8	3	87890.6	68616.5	86813.1	174587	278610	1.57721e+06	85030	35418.9	50015	496862	57739.2	140508	47470.9	100633	76690	202226	207259	172671	-	-	1.13337	0.323382	4.07775	2.02777	up	-	-	-	-	-	-	-	-	-	-	1.2578	0.303098	0.0839555	-3.57423
Lmmn003663	329.09	167.04	330.095	C14H18O9	[M-H]-	5-Glucosyloxy-2-Hydroxybenzoic acid methyl ester	Phenolic acids	Phenolic acids	-	1	15359.3	5469.4	12143.6	131494	210513	1.19171e+06	8256.75	26029.9	2278.28	39066.3	58894.6	39870.5	14265.4	6835.69	9876.76	109790	120396	133123	-	-	1.35325	0.0252026	3.76949	1.91437	up	1.18999	0.305637	0.0898677	-3.47605	down	1.2314	0.0192447	4.18022	2.06358	up	1.34644	0.280863	0.0238408	-5.39042
Saln003696	595.17	183.07	596.174	C27H32O15	[M-H]-	Jaslanceoside A	Terpenoids	Monoterpenoids	-	2	247179	165924	161549	36343.9	36379.4	22893.5	75957.8	47977.4	46527.7	81121.2	18878.6	102986	122559	73427.9	68291.6	169856	161897	140434	-	-	-	-	-	-	-	-	-	-	-	-	1.04053	0.030396	0.353232	-1.50131	down	-	-	-	-
Wccp006497	197.08	151.08	196.074	C10H12O4	[M+H]+	Ebracteolata Cpd B	Others	Others	83459-37-4	2	11793.9	29201.9	29746.3	67893.7	37910.5	1.93033e+06	60023.4	26556.3	6030.59	54018.1	22816.1	48278.3	8959.49	21364	9942.3	151979	143206	125355	-	-	-	-	-	-	-	-	-	-	-	-	-	-	-	-	-	-	-	-	-
zjbp110804	357.13	307.1	356.126	C20H20O6	[M+H]+	6,7-dimethoxy-2-[2-(4'-hydroxy-3'-methoxyphenyl)ethyl]chromone*	Others	Chromone	-	3	47196.1	209740	5204.28	12913	9098.4	368478	19225.8	10007.7	4511.2	4528.05	7822.57	2856.01	7356.52	23041.3	3948.87	53304.3	57151.3	47073.2	-	-	1.01492	0.284394	0.450637	-1.14996	down	-	-	-	-	-	-	-	-	-	-	-	-	-	-
Hmyp002656	222.08	130.06	221.069	C11H11NO4	[M+H]+	Methyl dioxindole-3-acetate	Alkaloids	Plumerane	57061-18-4	2	555542	449567	459932	123015	131081	208252	584954	403012	434980	285479	349964	380576	909228	704627	519436	374959	452250	398510	-	-	-	-	-	-	-	1.31096	0.0091377	2.19752	1.13588	up	-	-	-	-	-	1.45628	0.0156478	3.07765	1.62183
mws2367	299.11	119.05	300.121	C14H20O7	[M-H]-	Salidroside	Phenolic acids	Phenolic acids	10338-51-9	1	100855	72794	97183.4	76733.3	70359.8	235427	61994.1	35045.2	18564.1	23373.7	36048.5	24666.4	23142.8	22905.2	24599.3	53626.9	63655.3	64024.3	C06046	ko00350,ko01100	-	-	-	-	-	1.24449	0.206163	0.219828	-2.18555	down	1.30887	0.00936134	0.310482	-1.68742	down	1.1231	0.237582	0.302215	-1.72635
Hmln000873	331.07	169.01	332.074	C13H16O10	[M-H]-	2-O-Galloyl-D-glucose	Phenolic acids	Phenolic acids	-	3	62645.7	29630.2	35268.9	13253.9	10177.4	17234.9	28399.7	13768.4	12487.2	12056.7	13153.7	32681.7	16309.4	10108.6	8166.76	11929	11800.3	13992.7	-	-	-	-	-	-	-	-	-	-	-	-	1.0301	0.140933	0.453896	-1.13956	down	-	-	-	-
Wbjp002156	231.11	185.11	230.106	C13H14N2O2	[M+H]+	2-[(9R)-1,2,3,9-tetrahydropyrrolo[2,1-b]quinazolin-9-yl]acetic acid	Alkaloids	Alkaloids	-	2	4.51575e+06	5.33955e+06	4.79061e+06	8.32456e+06	7.56891e+06	7.42521e+06	2.81769e+06	3.34873e+06	156735	3.78778e+06	4.50272e+06	3.14377e+06	4.55947e+06	4.08537e+06	4.69363e+06	4.51794e+06	4.88812e+06	5.48093e+06	-	-	-	-	-	-	-	1.38056	0.00182931	0.490348	-1.02812	down	-	-	-	-	-	1.05205	0.0223298	0.271163	-1.88277
Zmwp003424	334.13	316.12	333.121	C17H19NO6	[M+H]+	Lycorenium A	Alkaloids	Alkaloids	-	3	1.32586e+06	985527	1.56319e+06	1.16252e+06	526355	573682	256104	670948	839522	387296	276940	438841	274947	1395140	215052	790746	708027	863811	-	-	-	-	-	-	-	1.11775	0.194676	0.487536	-1.03642	down	1.30918	0.0242882	0.284697	-1.8125	down	-	-	-	-
Qmyp101120	235.17	133.1	234.162	C15H22O2	[M+H]+	Procurcumenol*	Terpenoids	Sesquiterpenoids	-	2	43093.6	52757.2	21428.7	45749.7	19581.6	59929.5	51264.1	41760.5	43332.6	17689.8	29679	18276.2	50867.5	47997.4	26932.7	35180.5	41533.2	35082.3	-	-	1.59736	0.010193	0.481419	-1.05463	down	-	-	-	-	-	-	-	-	-	-	-	-	-	-
Hmmp002767	852.51	852.51	851.503	C45H73NO14	[M+H]+	α-Chaconine	Alkaloids	Steroid alkaloids	20562-03-2	2	2.99555e+06	1.88672e+06	2.31635e+06	651424	1.76628e+06	975228	2.93246e+06	1.94097e+06	1.92211e+06	1.41156e+06	1.60103e+06	1.56078e+06	5.26291e+06	3361969	2.88692e+06	2.159e+06	2.31855e+06	1.89791e+06	C10796	-	-	-	-	-	-	-	-	-	-	-	-	-	-	-	-	1.17731	0.0733413	2.00285	1.00206
Wdmp005533	513.23	351.18	512.216	C27H32N2O8	[M+H]+	(6R,7S,11aS,12aR,Z)-9-ethylidene-8-(((2S)-3,4,5-trihydroxy-6-(hydroxymethyl)tetrahydro-2H-pyran-2-yl)oxy)-8,9,10,11,11a,12-hexahydro-6H-6,10:11,12a-dimethanoindolo[3,2-b]quinolizin-13-ylacetate	Alkaloids	Plumerane	-	1	19614.8	26938.6	29741.7	38352.6	38726	24674.2	44948.5	76059.2	38240.2	27086.7	8048.75	22730.9	32469.7	40011.4	15597.5	22412.2	27401.1	25097.8	-	-	1.36966	0.0825403	0.363372	-1.46048	down	-	-	-	-	-	-	-	-	-	-	-	-	-	-
Zmbp000490	158.12	112.08	157.11	C8H15NO2	[M+H]+	Valerine	Alkaloids	Alkaloids	-	2	7.49787e+06	9.72158e+06	1.07966e+07	6.48889e+06	7.71575e+06	6.11626e+06	1.47745e+07	1.65146e+07	1.4191e+07	6.46278e+06	9.37789e+06	7.12051e+06	1.47959e+07	1.54583e+07	1.42881e+07	8.85726e+06	1.04249e+07	1.07295e+07	-	-	-	-	-	-	-	-	-	-	-	-	-	-	-	-	-	1.50914	0.00103318	2.2381	1.16227
MWSmce208	169.07	115.05	168.069	C11H8N2	[M+H]+	Norharmane; Beta-Carboline	Alkaloids	Plumerane	244-63-3	2	912586	695298	754509	367222	389446	335296	528940	500046	292622	199671	217425	223274	244379	182570	126423	452180	376922	385837	-	-	1.55025	0.0914114	0.484539	-1.04532	down	-	-	-	-	-	1.35445	0.0117753	0.271069	-1.88327	down	-	-	-	-
Wbsp001776	292.19	274.18	291.183	C17H25NO3	[M+H]+	(1S,4S,6R,9S,15R)-15-hydroxy-6-methyl-13-azatetracyclo[11.3.1.01,9.04,9]heptadecane-2,8-dione*	Alkaloids	Alkaloids	-	2	0	0	0	7.18219e+06	7.11094e+06	7.12155e+06	3.5164e+06	1.87157e+07	3.29298e+06	1.74253e+06	2.13105e+06	2.23751e+06	1.23306e+06	482101	1117705	5.02214e+06	4.80589e+06	4.11689e+06	-	-	1.21309	0.33244	0.239415	-2.06242	down	1.43548	0.000692507	0.285369	-1.8091	down	1.36074	0.00540879	#DIV/0!	#DIV/0!	up	-	-	-	-
Lacp003545	298.15	266.12	297.137	C18H19NO3	[M+H]+	Erythraline	Alkaloids	Pyrrole alkaloids	466-77-3	2	1.3692e+06	1.84877e+06	1.22315e+06	4.25304e+06	5.32639e+06	4.08796e+06	1.79754e+06	767868	4.32784e+06	1.53955e+06	870099	1.38461e+06	1.69077e+06	1.93882e+06	1.54378e+06	2.08524e+06	2.15042e+06	1.76871e+06	-	-	-	-	-	-	-	1.38956	0.00481252	0.277613	-1.84885	down	-	-	-	-	-	-	-	-	-
Wasn000410	245.04	153	246.05	C6H15O8P	[M-H]-	sn-glycero-3-phospho-(1'-sn-glycerol)	Others	Others	-	1	5.67076e+06	9.26392e+06	5.36839e+06	1.42605e+07	3.89553e+07	2.15379e+07	597807	462922	2.27935e+06	1.53825e+07	2.34232e+07	1.16576e+07	6.09721e+06	7.51959e+06	5.29569e+06	1.50512e+07	1.38428e+07	1.69579e+07	-	-	1.65772	0.0421989	15.1084	3.91728	up	-	-	-	-	-	1.18816	0.0878984	2.4855	1.31354	up	1.45952	0.0821695	0.0446811	-4.48419
mws0043	403.14	373.1	402.132	C21H22O8	[M+H]+	Nobiletin (5,6,7,8,3',4'-Hexamethoxyflavone)	Flavonoids	Flavones	478-01-3	2	401650	362093	696099	70496.4	59594.9	63955.6	145823	45829.6	56900.7	45390.6	53378.3	50329.5	119976	75043.2	65468.9	151745	140288	123430	C10112	-	-	-	-	-	-	-	-	-	-	-	1.33773	0.0534629	0.102133	-3.29148	down	-	-	-	-
MW0129528	257.12	133.06	256.11	C16H16O3	[M+H]+	1-(2-Hydroxy-4-methoxyphenyl)-3-phenylpropan-1-one	Others	Ketone compounds	22141-31-7	3	12392.5	229220	7648.61	6300.83	15432.5	2.61982e+06	4.67764e+06	23653.3	90814.6	12661	7448.69	3904.22	56427.7	62010.8	296250	636836	524473	549323	-	-	1.27525	0.410572	0.00501115	-7.64064	down	-	-	-	-	-	-	-	-	-	-	-	-	-	-
Lmgp000796	150.06	61.01	149.048	C8H7NO2	[M+H]+	4-Hydroxymandelonitrile	Alkaloids	Phenolamine	13093-65-7	3	217048	205891	213524	26546.8	51078.2	69564.6	116636	118254	106912	63660.1	118273	50945.4	31158.2	29583.5	20731.5	124811	121274	102404	C00650	-	-	-	-	-	-	-	-	-	-	-	1.22246	0.0205815	0.365895	-1.4505	down	1.31868	0.0275086	2.32219	1.21549
Wchn003892	355.11	193.05	356.111	C16H20O9	[M-H]-	Juglanoside E*	Others	Others	-	1	509841	143557	513166	32050.2	28120.1	24327.6	41777.4	40204.9	48972.6	161327	224690	193526	35366.9	39827.2	34153.4	145195	161508	131022	-	-	1.73444	0.0131786	4.42551	2.14584	up	1.43725	0.0111654	6.85865	2.77793	up	-	-	-	-	-	-	-	-	-
mws1622	219.17	111.12	218.167	C15H22O	[M+H]+	α-Cyperone	Others	Ketone compounds	473-08-5	2	239808	103662	42056.5	176483	55889	216739	194161	188009	156898	72435.9	86512.6	57977.4	108400	78831.3	88436.4	129347	118783	104632	C17090	-	1.68583	0.00240634	0.40241	-1.31326	down	-	-	-	-	-	-	-	-	-	-	-	-	-	-
Wmmn000125	525.16	167.03	526.169	C24H30O13	[M-H]-	mudanpioside E*	Others	Others	172705-25-8	2	893562	711742	835539	40404.6	36561.9	51593.8	62517.3	50333.7	17460.5	10585.2	17099.9	16481	56940.2	29567.1	25007.3	169123	205631	202989	-	-	1.34728	0.163626	0.338927	-1.56095	down	1.36908	0.0129363	0.343544	-1.54143	down	1.35853	0.00442635	0.0180946	-5.7883	down	-	-	-	-
Wcgp003250	163.08	103.05	162.068	C10H10O2	[M+H]+	2-Methyl-3-hydroxyindan-1-one	Others	Others	-	1	3.03102e+06	4.65262e+06	1.60982e+06	1.22813e+06	699237	4.27285e+06	2.05575e+06	572119	201188	899844	833535	937813	2.4264e+06	2.12493e+06	927198	1.48702e+06	1.77269e+06	1.47883e+06	-	-	-	-	-	-	-	-	-	-	-	-	1.199	0.128497	0.287427	-1.79873	down	-	-	-	-
Cmsp002787	227.09	181.05	226.084	C11H14O5	[M+H]+	3,4'-Dihydroxy-3',5'-dimethoxypropiophenone	Phenolic acids	Phenolic acids	136196-47-9	3	220362	237825	268463	157998	201537	189434	406357	582314	261711	88479	74598.6	119362	128829	38590.1	149561	267975	275777	225202	-	-	1.6561	0.0707571	0.225883	-2.14635	down	-	-	-	-	-	1.30587	0.00157632	0.388687	-1.36332	down	1.32179	0.12511	2.27769	1.18757
Wcdp006741	520.34	184.08	519.332	C26H50NO7P	[M+H]+	1-(9Z,12Z-Octadecadienoyl)-Sn-Glycero-3-Phosphocholine	Others	Others	22252-07-9	1	5.71451e+07	4.38394e+07	3.86083e+07	8.13141e+06	9.13109e+06	1.91102e+07	5.82514e+06	1.20995e+07	5.38394e+06	6.05287e+06	7.73016e+06	6.19498e+06	1.56153e+07	5.46446e+06	5134086	1.93489e+07	1.67768e+07	1.57834e+07	-	-	-	-	-	-	-	-	-	-	-	-	1.34969	0.0178564	0.143116	-2.80474	down	-	-	-	-
pme0460	291.09	139.04	290.079	C15H14O6	[M+H]+	Epicatechin	Flavonoids	Flavanols	490-46-0	3	319915	267394	293499	44720.4	43489.7	54273.5	7051.52	23553.9	39951.6	28827.4	77530.2	17514.2	122187	152294	105713	94621.2	116041	112630	C09727	ko00941,ko01100,ko01110	-	-	-	-	-	-	-	-	-	-	1.25242	0.000544693	0.140634	-2.82998	down	1.02651	0.11496	0.495193	-1.01394
Lmyn002540	368.1	162.06	369.106	C16H19NO9	[M-H]-	Dioxindole-3-acetyl-3-O-glucoside	Alkaloids	Plumerane	-	3	65808.6	23973.5	48443	13759.4	8679.36	11747.3	10651.8	12913	7290.37	8960.44	8475.73	19927.6	13909.7	9904.18	13476.7	22943	19485.7	18887.7	-	-	-	-	-	-	-	-	-	-	-	-	1.17861	0.0985708	0.270311	-1.88731	down	-	-	-	-
Wcsp001338	436.12	274.08	435.117	C20H21NO10	[M+H]+	7-hydroxy-2,3,4-triacetoxy	Alkaloids	Alkaloids	-	3	4.05176e+06	3.4387e+06	3.53694e+06	1.34138e+06	1.05895e+06	1.61399e+06	1.13133e+06	1.61053e+06	3.42368e+06	2.56974e+06	2.63078e+06	1.96246e+06	2.56629e+06	2.21534e+06	1.93394e+06	2.42673e+06	3.01247e+06	2.77191e+06	-	-	-	-	-	-	-	-	-	-	-	-	-	-	-	-	-	-	-	-	-
Wcjp003053	478.14	195.06	477.127	C22H23NO11	[M+H]+	Trans-Dihydronarciclasine Peracetate	Alkaloids	Alkaloids	-	3	0	0	0	0	0	0	0	0	0	41822.6	67042	72884.2	0	0	0	60842.2	66426	53494.4	-	-	1.75118	0.0238655	#DIV/0!	#DIV/0!	up	1.44477	0.0238655	#DIV/0!	#DIV/0!	up	1.35712	0.0238655	#DIV/0!	#DIV/0!	up	-	-	-	-
Labn002264	315.11	153.05	316.116	C14H20O8	[M-H]-	Grevilloside G*	Phenolic acids	Phenolic acids	791846-69-0	2	1.38653e+06	663424	1.31587e+06	292935	282831	336675	825134	865240	938328	790454	300936	1.63034e+06	534480	480529	488534	567338	675719	698021	-	-	-	-	-	-	-	-	-	-	-	-	-	-	-	-	-	1.52858	0.000661968	2.88096	1.52655
HX1348	133.05	69.03	132.042	C5H8O4	[M+H]+	2-hydroxymethyl-D-ribono-γ-lactone	Others	Others	-	3	385887	312851	469431	90134.6	93877.2	80947.3	117916	167830	117293	87102.4	261221	98679.1	71845	55272.8	60742.5	164382	132932	144077	-	-	-	-	-	-	-	-	-	-	-	-	1.11944	0.0310846	0.382652	-1.38589	down	-	-	-	-
Lshp011010	276.16	175.08	275.152	C16H21NO3	[M+H]+	N-Demethyllycoramine	Alkaloids	Alkaloids	-	1	1.05685e+07	9.743e+06	1.36109e+07	1.39712e+06	698921	751500	12704696	1.74218e+07	8.18762e+06	1.61121e+06	4.67775e+06	2.00186e+06	181369	158062	145927	9.83114e+06	7.90358e+06	9.0788e+06	-	-	1.58779	0.0509355	0.216391	-2.20829	down	1.14732	0.195636	2.91157	1.5418	up	1.23644	0.005518	0.244405	-2.03265	down	1.49937	0.0463768	13.4551	3.75009
Wcdp007560	522.35	184.07	521.348	C26H52NO7P	[M+H]+	1-Vaccenoyl-Glycero-3-Phosphocholine	Others	Others	-	2	1.50728e+07	1.09521e+07	9.48195e+06	3.45289e+06	3.35667e+06	7.06961e+06	2.48449e+06	5.8535e+06	1.64903e+06	1.96197e+06	1.92774e+06	2.01236e+06	3.86318e+06	1.43166e+06	1.3957e+06	5.79814e+06	5.06367e+06	4.6818e+06	-	-	-	-	-	-	-	1.24102	0.16146	0.425246	-1.23363	down	1.35011	0.0275467	0.166223	-2.58881	down	-	-	-	-
MW0003631	177.06	117.03	154.063	C8H10O3	[M+Na]+	Hydroxytyrosol	Phenolic acids	Phenolic acids	10597-60-1	3	210899	217349	240902	144737	95062.4	148614	90384.1	143717	38461.2	154974	112401	146514	269652	234212	145246	153464	183165	150992	-	-	-	-	-	-	-	-	-	-	-	-	-	-	-	-	-	-	-	-	-
Zbsp003876	169.05	123.05	168.042	C8H8O4	[M+H]+	2,6-Dimethoxy-1,4-benzoquinone	Quinones	Quinones	530-55-2	1	108128	62572.9	68661.9	348743	452245	1.83862e+06	51738.3	69095.9	31800.8	71194.7	146751	92001.1	47001.3	36675	21503.4	261929	281469	225638	C10331	-	1.30897	0.130756	2.03064	1.02193	up	1.24914	0.247135	0.117421	-3.09023	down	-	-	-	-	-	1.4009	0.226448	0.0578248	-4.11217
Lhfp112913	177.05	131.05	176.047	C10H8O3	[M+H]+	Dihydrojuglone	Quinones	Quinones	-	2	407873	414693	512148	181382	116606	230921	262945	453669	395268	327438	216391	368178	217279	170467	117417	240884	299315	261458	-	-	-	-	-	-	-	-	-	-	-	-	-	-	-	-	-	1.27867	0.0537837	2.10222	1.07191
Lmhn002321	461.07	167.04	462.08	C21H18O12	[M-H]-	Vnilloylcaffeoyltartaric acid	Phenolic acids	Phenolic acids	-	3	12121.1	3178.61	9716.78	26720.2	38965.1	32958.8	8851.61	3524.42	4185.22	3498.53	3687.75	7432.07	16687.8	21593	15261.3	9087.52	9983.92	11327.2	-	-	-	-	-	-	-	1.39579	0.00891783	0.148193	-2.75445	down	-	-	-	-	-	1.46426	0.00703021	0.167889	-2.57442
Lmtn002233	327.11	165.05	328.116	C15H20O8	[M-H]-	Androsin	Phenolic acids	Phenolic acids	531-28-2	1	80978.2	98643	94967.6	154187	195040	200153	201669	26155.5	27603.2	90903.2	95108.3	125364	256242	277006	251881	118139	145901	124937	-	-	-	-	-	-	-	-	-	-	-	-	-	-	-	-	-	1.03979	0.230541	0.464938	-1.10489
pmp001287	120.08	103.05	119.073	C8H9N	[M+H]+	N-Benzylmethylene isomethylamine	Alkaloids	Alkaloids	-	1	1.23398e+07	9.80252e+06	1.15819e+07	2.35468e+06	2.77092e+06	3.37532e+06	3.87625e+06	6.61393e+06	5.80338e+06	2.76667e+06	4.37415e+06	2.35117e+06	1.91247e+06	1.5828e+06	1.5814e+06	6.37057e+06	5.30193e+06	5.25756e+06	-	-	-	-	-	-	-	-	-	-	-	-	1.29882	0.00134866	0.281459	-1.829	down	-	-	-	-
Hmgn001653	137.02	93.04	138.032	C7H6O3	[M-H]-	Protocatechualdehyde*	Others	Aldehyde compounds	139-85-5	1	282118	400250	352358	361576	306170	299533	212595	294802	317617	468984	299438	450977	648270	609855	621696	326908	378987	409605	C16700	ko00950	-	-	-	-	-	-	-	-	-	-	-	-	-	-	-	-	-	-	-
Wbsp000054	320.19	320.19	319.178	C18H25NO4	[M+H]+	Cernupalhine A	Alkaloids	Alkaloids	-	2	1.05216e+06	477385	1.13087e+06	798660	1.37755e+06	876666	502553	366466	300265	947872	315505	699308	774843	939650	720049	674568	735069	841351	-	-	-	-	-	-	-	-	-	-	-	-	-	-	-	-	-	1.38895	0.0623904	0.38301	-1.38454
Lhmp121005	521.2	131.05	520.194	C26H32O11	[M+H]+	Symplocosin*	Lignans and Coumarins	Lignans	-	1	639647	3.61953e+06	285477	1.23495e+06	423810	6.34693e+06	2.47808e+06	254246	106456	266155	363910	218563	2.71527e+06	2.09157e+06	971057	1.34336e+06	1.20436e+06	1.07084e+06	-	-	-	-	-	-	-	1.06304	0.326991	0.106003	-3.23782	down	-	-	-	-	-	-	-	-	-
Lshp011101	470.13	308.08	469.122	C20H23NO12	[M+H]+	Narciclasine 4-Glucopyranoside	Alkaloids	Piperidine alkaloids	-	2	1.02764e+06	1174830	1509630	300979	161798	231943	557138	622312	354417	168440	158778	167299	260299	267695	190992	423257	344048	420807	-	-	1.68084	0.0499754	0.322399	-1.63308	down	-	-	-	-	-	1.35051	0.0171881	0.133218	-2.90814	down	1.31221	0.054705	2.20789	1.14267
Lakn004098	281.14	171.12	282.147	C15H22O5	[M-H]-	Dihydrophaseic acid	Terpenoids	Sesquiterpenoids	41756-77-8	2	5858.27	9040.07	7599.33	2469.15	2823.8	1507.01	3854.24	22176.4	4138.63	7902.89	15958.6	10201.5	12322.6	14014	11289.6	9696.17	8087.29	7934.4	C15971	ko00906	-	-	-	-	-	1.37606	0.0594809	5.0093	2.32461	up	-	-	-	-	-	1.08555	0.327281	4.43668	2.14948
MWSmce548	118.09	58.07	117.079	C5H11NO2	[M+H]+	Betaine	Alkaloids	Alkaloids	107-43-7	2	5.63347e+06	6.3268e+06	5.06129e+06	3.85729e+06	4.91531e+06	5.00044e+06	5.71647e+06	2.68947e+06	7.54108e+06	7.04005e+06	6.20471e+06	7.95608e+06	3.06583e+06	3.1574e+06	2.96646e+06	6.0434e+06	6.05055e+06	4.91956e+06	C00719	ko00260,ko01100,ko02010	-	-	-	-	-	-	-	-	-	-	-	-	-	-	-	-	-	-	-
Lmzn001983	375.13	135.05	376.137	C16H24O10	[M-H]-	D-Threo-guaiacylglycerol-7-O-β-D-glucoside	Phenolic acids	Phenolic acids	-	2	4798.26	7008.14	5220.33	3885.07	1832.65	10497.8	6480.64	5784.1	12129	13514.6	11008.3	13955.5	22278.9	27909.9	20713.8	9313.02	11278.5	11593.2	-	-	-	-	-	-	-	1.04443	0.0919267	2.37294	1.24668	up	1.29612	0.00434725	2.25988	1.17625	up	-	-	-	-
mws1175	271.1	167.03	270.089	C16H14O4	[M+H]+	Pinostrobin	Flavonoids	Flavanones	480-37-5	1	8822.08	102829	6225.89	5280.25	5959.16	10185	2.6868e+06	7433.67	27708.4	2288.61	4148.17	8899.69	4707.45	3056.51	4201.63	221781	182222	183249	C16419	ko00941	1.11985	0.417306	0.00563439	-7.47152	down	-	-	-	-	-	-	-	-	-	-	-	-	-	-
Layp007325	257.08	137.02	256.074	C15H12O4	[M+H]+	Bauhinoxepin J*	Others	Alcohol compounds	942513-05-5	1	6465.59	19189.5	1658.74	7983.86	36703.4	1.08185e+06	95584.7	7252.21	5593.31	5871.98	2839.45	1844.35	9033.41	51794.7	19469.7	98837.7	86604.4	78650.1	-	-	1.12391	0.38688	0.0973509	-3.36066	down	1.04537	0.402779	0.00937012	-6.73772	down	-	-	-	-	-	-	-	-	-
Lmxn006423	150	122.01	151.009	C7H5NOS	[M-H]-	2(3H)-Benzothiazolone	Alkaloids	Alkaloids	934-34-9	1	34164.8	47937.1	23494.5	44174.3	35214	59904.2	67817	59992.4	75375	39379.6	41959.8	34825.6	28585	25990.9	19511	33888.8	39222.9	42758.9	-	-	-	-	-	-	-	-	-	-	-	-	-	-	-	-	-	-	-	-	-
Lman002117	341.09	179.04	342.095	C15H18O9	[M-H]-	Grevilloside Q	Others	Ketone compounds	1708967-64-9	2	257170	141049	218762	469670	326554	411087	538295	67207.3	119051	135361	231415	184793	209459	216861	79586.5	198346	248552	237688	-	-	-	-	-	-	-	1.30803	0.0160732	0.456857	-1.13019	down	-	-	-	-	-	-	-	-	-
Zmdp000376	130.09	84.08	129.09	C5H11N3O	[M+H]+	4-Guanidinobutanal	Others	Aldehyde compounds	-	3	1.76095e+07	1.51081e+07	1.68982e+07	303376	1.31075e+06	430315	2.95201e+07	1.02466e+07	2.37897e+07	1.1741e+06	542528	899143	1.25953e+06	1.12106e+06	1.20469e+06	1.48482e+07	1.22968e+07	1.21506e+07	-	-	1.70311	0.0706771	0.0411566	-4.60273	down	-	-	-	-	-	1.34723	0.00136037	0.0527204	-4.24549	down	1.46733	0.0692112	31.0874	4.95826
Zmwp001739	274.14	213.09	273.137	C16H19NO3	[M+H]+	Kirkine	Alkaloids	Isoquinoline alkaloids	115730-50-2	1	8.42092e+06	7.86316e+06	6.65896e+06	1.45906e+07	1.806e+07	1.69594e+07	1.40397e+07	6.75412e+06	2.04718e+06	3.71388e+06	4.44292e+06	4.19006e+06	3.42721e+06	4.14023e+06	4.39334e+06	8.97223e+06	7.52696e+06	7.26836e+06	-	-	-	-	-	-	-	1.43354	0.00512127	0.248879	-2.00649	down	-	-	-	-	-	1.0329	0.115204	0.460411	-1.119
Wccp003194	292.08	232.06	291.074	C14H13NO6	[M+H]+	Lycoricidine; 7-Deoxynarciclasine	Alkaloids	Alkaloids	19622-83-4	1	1.55667e+06	1.20894e+06	1.47157e+06	970768	970781	940584	1.28891e+06	1.00138e+06	994616	911272	652860	1.04156e+06	715857	555707	555148	1.23465e+06	1.01951e+06	1.01233e+06	C08531	-	-	-	-	-	-	-	-	-	-	-	-	-	-	-	-	-	-	-	-
pmb0819	157.08	130.07	156.069	C10H8N2	[M+H]+	3-Indoleacetonitrile	Alkaloids	Plumerane	771-51-7	3	2.98626e+06	3.98006e+06	4.1845e+06	1.25194e+06	1.61468e+06	1.68619e+06	2.45263e+06	2.68063e+06	3.13457e+06	2.30986e+06	3.4154e+06	2.05789e+06	1.29394e+06	1.48722e+06	1.47611e+06	2.45323e+06	2.3964e+06	2.9472e+06	C02938	ko00380,ko01100	-	-	-	-	-	-	-	-	-	-	-	-	-	-	-	-	-	-	-
mws0983	326.31	62.06	325.298	C20H39NO2	[M+H]+	N-Oleoylethanolamine	Alkaloids	Alkaloids	111-58-0	3	10233.6	6434.1	8450.82	28538.5	16568.1	17047.8	43983.5	7517.97	2786.54	3442.5	1934.34	3114.57	4332.44	6823.9	4006.32	11769	9346.08	10241.1	C20792	-	1.07945	0.361612	0.156414	-2.67656	down	1.41028	0.0429964	0.136618	-2.87178	down	1.27192	0.0239024	0.338054	-1.56468	down	-	-	-	-
MW0112082	136.07	91.05	135.068	C8H9NO	[M+H]+	2-Aminoacetophenone	Others	Ketone compounds	613-89-8	3	2.2329e+06	1.70377e+06	1.59691e+06	604080	927335	868313	661047	1.05444e+06	1.44487e+06	683982	1.2866e+06	758854	460285	440378	365081	1.15166e+06	1.16598e+06	937669	-	-	-	-	-	-	-	-	-	-	-	-	1.16896	0.0267911	0.493249	-1.01961	down	-	-	-	-
Wcsp002025	304.15	137.06	303.147	C17H21NO4	[M+H]+	carinatine*	Alkaloids	Alkaloids	64937-89-9	1	6.03524e+06	4.71296e+06	4.71926e+06	2.39608e+06	2.76955e+06	2.36919e+06	1.68836e+06	5.0823e+06	7.6708e+06	1.00894e+06	1.87445e+06	1.31881e+06	1.14245e+06	908690	757507	3.25661e+06	2.95817e+06	2.56742e+06	-	-	1.30972	0.185288	0.290981	-1.781	down	-	-	-	-	-	1.30796	0.00410254	0.27168	-1.88002	down	-	-	-	-
MWSHY0017	273.08	153.02	272.068	C15H12O5	[M+H]+	Naringenin (5,7,4'-Trihydroxyflavanone)	Flavonoids	Flavanones	480-41-1	3	32778	24611.9	9679.51	16942.5	25153.2	344171	31105.8	9555.37	10272.4	27697.5	5052.56	4959.73	20252.4	71280.7	58949.1	46914.7	36970.6	42605	C00509	ko00941,ko00943,ko01100,ko01110	-	-	-	-	-	-	-	-	-	-	-	-	-	-	-	-	-	-	-
MW0114597	356.1	150.06	357.106	C15H19NO9	[M-H]-	HMBOA-Glc	Alkaloids	Alkaloids	17622-26-3	3	7643.83	13637.7	8407.24	10123.9	8358.46	13632.1	44848	44092	26538.7	34841	15551.9	35639.3	20842.1	22753	7970.11	13706.8	17360.6	15263	-	-	-	-	-	-	-	1.19281	0.104593	2.67893	1.42165	up	1.15052	0.0938772	2.8978	1.53496	up	1.46192	0.0363009	3.59585	1.84633
MW0137871	345.05	311.07	286.048	C15H10O6	[M+CH3COO]-	Datiscetin	Flavonoids	Flavones	480-15-9	3	138168	104880	133452	5711.36	6800.39	5500.24	9244.04	19336.1	14993.1	23431.5	39203.8	31019.5	32998.8	35778.4	38766.4	42417.4	52029.6	42816.2	C10036	-	1.45757	0.0455121	2.14936	1.10391	up	1.42542	0.0302799	5.19958	2.37839	up	1.32548	0.00509074	0.248751	-2.00722	down	1.36049	0.0976122	2.41913	1.27449
Zjhp090604	287.09	167.04	286.084	C16H14O5	[M+H]+	5,7-dihydroxy-3-(4'-hydroxybenzyl)-chroman-4-one	Flavonoids	Other Flavonoids	-	3	113597	465793	9714.74	155719	170087	3.95846e+06	670999	10696	22326.1	9179.35	34309.1	4729.04	104992	255499	130178	445984	371914	359767	-	-	-	-	-	-	-	1.21351	0.380504	0.0112545	-6.47335	down	-	-	-	-	-	-	-	-	-
pma0633	349.26	203.22	348.252	C19H32N4O2	[M+H]+	N-p-Coumaroylspermine	Alkaloids	Phenolamine	130210-35-4	3	79968.4	65696	79778.8	134706	139059	135123	55244.7	32587.3	84322.9	92582.2	64695.5	81800.7	51395.9	44156.9	52693.2	95987.6	103945	81799.6	-	-	-	-	-	-	-	-	-	-	-	-	-	-	-	-	-	1.34203	0.0332218	0.421031	-1.248
mws1350	181.05	151	182.058	C9H10O4	[M-H]-	Syringaldehyde; 4-Hydroxy-3,5-Dimethoxybenzaldehyde	Others	Aldehyde compounds	134-96-3	2	3340	5654.88	18786.6	10995.5	10736.1	31087.8	26397.9	9791.46	24579.5	54041.9	17335.7	27581.5	0	0	0	10187.2	12742.2	12533.1	-	-	-	-	-	-	-	-	-	-	-	-	1.0475	0.149654	3.56204	1.83271	up	-	-	-	-
Zabp008827	351.16	107.05	350.152	C22H22O4	[M+H]+	3',5-dihydroxy-2-(p-hydroxybenzyl)-3-methoxybibenzyl	Others	Others	-	3	26653.4	22122.8	23129.6	21768.9	28773.8	18875.7	18880	17568.1	32663.8	16659.8	11677	21174.2	11743	13352.1	10341.4	20833.5	23187.6	18192.1	-	-	-	-	-	-	-	-	-	-	-	-	-	-	-	-	-	-	-	-	-
Wcdp006247	518.32	184.08	517.317	C26H48NO7P	[M+H]+	1-18:3-LysoPC	Others	Others	-	1	2.57629e+06	1.79134e+06	2.0908e+06	118854	85356.7	179396	96727.4	352263	135767	85954.2	147295	84252.5	486868	167167	133783	643293	554757	507856	-	-	-	-	-	-	-	-	-	-	-	-	1.34856	0.0117399	0.0491608	-4.34635	down	-	-	-	-
Lmlp006175	435.13	273.09	434.121	C21H22O10	[M+H]+	Isosalipurposide (Phlorizin Chalcone)*	Flavonoids	Chalcones	4547-85-7	2	279734	177547	334761	32552.3	19653.4	33508.2	139809	283056	42092.2	266189	85999.4	424456	664335	557386	282180	281147	238027	223297	C16406	ko00941	-	-	-	-	-	1.28295	0.142361	9.06089	3.17965	up	-	-	-	-	-	1.21781	0.212155	5.42453	2.4395
Lmtn001569	474.16	312.1	475.169	C20H29NO12	[M-H]-	2-Glucosyl-glucosyloxy-2-phenylacetic acid amide	Alkaloids	Alkaloids	-	2	38796	5362.26	34696.4	1351.38	6148.64	8265.63	67672.9	48392.1	17356.4	34166.8	24116.1	73377.8	31435.1	26773.7	13626.7	20306.7	19412.7	16025.9	-	-	-	-	-	-	-	1.25538	0.12131	8.35111	3.06197	up	-	-	-	-	-	1.32242	0.113197	8.46279	3.08113
MW0004115	190.09	58.99	167.095	C9H13NO2	[M+Na]+	4-Methoxytyramine	Phenolic acids	Phenolic acids	3213-30-7	3	581461	449775	574845	41516.1	98111	76005.1	47634	22745.1	54016.6	16003.6	101191	36675	33340	18727.5	41680	148398	188838	164211	-	-	-	-	-	-	-	-	-	-	-	-	1.25839	0.00160995	0.0958045	-3.38376	down	-	-	-	-
Wbkn005292	519.18	357.13	520.194	C26H32O11	[M-H]-	[(1S,2S,3S,7R,9R,13S,14R,15R,17S)-3,15-diacetyloxy-7-hydroxy-2,6,14-trimethyl-4,11,16-trioxo-10-oxatetracyclo[7.7.1.02,7.013,17]heptadec-5-en-17-yl]methylacetate*	Terpenoids	Ditepenoids	-	1	4401.73	6366.8	6697.15	82013.3	26508.5	65279.5	50555.9	12334.6	2937.21	14673.4	5649.74	14670.7	26775.1	48766.1	11728.5	28628.3	29689.5	23463.3	-	-	-	-	-	-	-	1.26535	0.101946	0.201344	-2.31227	down	-	-	-	-	-	-	-	-	-
mws1038	277.12	146.08	278.13	C11H22N2O4S	[M-H]-	Pantetheine	Alkaloids	Alkaloids	496-65-1	1	52351.4	40314.8	62220.9	25873.1	21058.8	21638.2	21954.8	17136.4	23402.6	18645.4	22495	17726.3	32393.4	36004.3	23758.1	21020.7	26456.5	22232.3	C00831	ko00332,ko00770,ko01100,ko01110	-	-	-	-	-	-	-	-	-	-	1.30243	0.0315985	0.380062	-1.39569	down	-	-	-	-
Lshp011011	360.14	149.06	359.137	C19H21NO6	[M+H]+	6β-acetoxycrinamine	Alkaloids	Pyridine alkaloids	-	1	791474	417348	1.0039e+06	2.18919e+07	1.44984e+07	1.44129e+07	1.02331e+06	854742	7.63439e+06	9.3909e+07	6.2722e+06	1.28044e+08	431479	284317	217132	1.89067e+07	2.42681e+07	2.16962e+07	-	-	1.40497	0.181666	23.9923	4.5845	up	-	-	-	-	-	1.2158	0.173368	103.143	6.6885	up	1.30154	0.014869	0.187241	-2.41703
Labn003679	327.11	147.05	328.116	C15H20O8	[M-H]-	(E)-caffeyl alcohol 4-O-β-D-glucopyranoside	Phenolic acids	Phenolic acids	-	1	58170.7	34267.8	34618.2	170182	128702	210887	961463	1.97488e+06	41829.7	56474.2	51451.7	65708.2	561346	467313	242350	267353	336546	331935	-	-	1.14732	0.235984	0.0583023	-4.1003	down	1.39528	0.038512	0.340613	-1.5538	down	-	-	-	-	-	-	-	-	-
Xmmn002939	341.09	179.04	342.11	C19H18O6	[M-H]-	Methylophiopogonanone A	Flavonoids	Other Flavonoids	74805-92-8	2	67097.3	72006.4	97889	36122.3	54370.4	53688	131394	48110.6	36829.6	158134	132489	220481	178715	215534	150939	88854.1	106220	113778	-	-	1.33427	0.0694168	2.36256	1.24035	up	1.37841	0.0370739	3.54488	1.82574	up	1.21237	0.0591598	2.15662	1.10877	up	-	-	-	-
Hmyn001360	299.11	59.01	300.136	C18H20O4	[M-H]-	Doitungbiphenyl A	Phenolic acids	Phenolic acids	-	2	221210	135586	203762	159436	157865	489964	150587	57306.4	53089	64563.1	57911.6	58199.5	55129.2	47585	48162.3	115775	148828	134333	-	-	-	-	-	-	-	1.27026	0.199104	0.22381	-2.15965	down	1.31745	0.0392032	0.322311	-1.63347	down	1.12297	0.236371	0.323291	-1.62909
Zbzp003763	177.05	134.04	176.047	C10H8O3	[M+H]+	11-methoxy viburtinal	Terpenoids	Monoterpenoids	-	3	396361	161651	366916	99432.8	91550.7	103703	46680	57336.2	54511.4	113559	347529	80528	78806.7	103420	94526.2	102835	87318.4	80937.5	-	-	1.33064	0.267887	3.41654	1.77254	up	-	-	-	-	-	-	-	-	-	-	-	-	-	-
Lshp011107	346.17	213.09	345.158	C19H23NO5	[M+H]+	norbutsanguininem	Alkaloids	Alkaloids	-	3	17502.5	31675	20005	46923.3	72627.3	56850.2	6670	11670	15005	8340	1670	15005	38345	14334.5	10005	35363.4	35631.8	28340	-	-	-	-	-	-	-	1.25647	0.00938705	0.141808	-2.81799	down	-	-	-	-	-	1.46791	0.0163437	0.18903	-2.40331
pmb3023	449.11	287.06	450.116	C21H22O11	[M-H]-	Eriodictyol-8-C-glucoside*	Flavonoids	Flavanones	1023271-51-3	3	74584.2	42491.5	58958.3	27361.6	16985.1	22359.4	27440.9	16843.7	44468.1	75429	23496.3	144555	51077.4	73603.9	55295.4	40652.4	41512.5	50631.6	-	-	1.00403	0.27685	2.74335	1.45594	up	-	-	-	-	-	-	-	-	-	-	-	-	-	-
Lmtn002796	449.11	287.06	450.116	C21H22O11	[M-H]-	Aromadendrin-7-O-glucoside*	Flavonoids	Flavanonols	28189-90-4	3	74584.2	42491.5	58958.3	27361.6	16985.1	22359.4	27440.9	16843.7	44468.1	75429	23496.3	144555	51077.4	73603.9	55295.4	40652.4	41512.5	50631.6	-	-	1.00403	0.27685	2.74335	1.45594	up	-	-	-	-	-	-	-	-	-	-	-	-	-	-
Lmtn001630	312.11	150.05	313.116	C14H19NO7	[M-H]-	2-Glucosyloxy-2-phenylacetic acid amide	Alkaloids	Alkaloids	-	2	69948.2	59199.3	66206.1	24686.4	23333.8	24513	46859.2	66897.2	36784	38221.9	50528.6	46526.7	30484.7	26396.8	19783.3	45717.4	35532.2	41707.7	-	-	-	-	-	-	-	-	-	-	-	-	-	-	-	-	-	1.39011	0.0986086	2.07547	1.05344
Yhhn000821	431.1	88.99	432.106	C21H20O10	[M-H]-	kwanzoquinone C	Quinones	Anthraquinone	-	1	137484	129037	144552	256305	210409	313573	115612	111295	111645	126861	71031.3	77525.1	215888	247367	226986	127517	146782	114350	-	-	-	-	-	-	-	1.35266	0.0138796	0.352969	-1.50239	down	-	-	-	-	-	1.47761	0.0384485	0.433882	-1.20463
Yamn004825	579.2	339.12	580.216	C28H36O13	[M-H]-	Syringaresinol-4'-O-glucoside	Lignans and Coumarins	Lignans	-	2	59052.2	164096	27789.2	149735	54915.1	514854	492473	24832.3	11654	39873.7	40995.4	19536	189648	119300	68472.7	90134	112127	114217	-	-	-	-	-	-	-	1.11664	0.278759	0.139547	-2.84117	down	-	-	-	-	-	-	-	-	-
Zmhp004830	345.12	183.07	344.111	C15H20O9	[M+H]+	domesticoside	Phenolic acids	Phenolic acids	-	1	3.76924e+07	7.59847e+06	1.09066e+07	4.04441e+07	2.6775e+07	8.35585e+07	4.25336e+06	7.18571e+06	130470	7.17429e+06	5.8423e+06	6.30634e+06	1.18536e+07	527372	446656	1.93678e+07	1.66739e+07	1.5102e+07	-	-	-	-	-	-	-	1.37588	0.124541	0.128155	-2.96403	down	-	-	-	-	-	1.19677	0.111314	0.0767326	-3.70402
Hmyn000254	297.12	59.01	298.12	C18H18O4	[M-H]-	Tababiphenyl C	Others	Chromone	1644433-50-0	2	104367	121355	95848.9	147388	118545	113867	107038	64200	122516	168961	124766	217149	375399	267171	390440	162848	173760	206971	-	-	-	-	-	-	-	-	-	-	-	-	-	-	-	-	-	-	-	-	-
pme3200	74.07	57.05	73.064	C2H7N3	[M+H]+	1-Methylguanidine	Alkaloids	Alkaloids	471-29-4	3	604763	746591	574538	1.03955e+06	1.06869e+06	1.38126e+06	385535	347571	371705	578774	621998	401414	484326	507561	517593	836473	738068	648327	C02294	-	-	-	-	-	-	1.3356	0.0127285	0.459145	-1.12298	down	-	-	-	-	-	1.5158	0.0175906	0.31661	-1.65922
Zblp006606	257.12	133.07	256.11	C16H16O3	[M+H]+	4-Hydroxy-2-methoxydihydrochalcone	Flavonoids	Chalcones	-	3	63755.8	162039	6860.1	16478.2	60297.9	747025	334344	11760.9	29625.8	3422.96	2231.73	2724.33	22564.3	85655.3	34853.7	110637	86239.7	94535.8	-	-	1.44674	0.362624	0.0223006	-5.48677	down	1.22032	0.369409	0.0101712	-6.61937	down	1.1159	0.240835	0.0360149	-4.79526	down	-	-	-	-
Zmsp002526	302.14	137.06	301.131	C17H19NO4	[M+H]+	Haemanthamin	Alkaloids	Isoquinoline alkaloids	-	3	3.47684e+06	2.10262e+06	3.06022e+06	1.02673e+06	1.87716e+06	2.76279e+06	877693	991368	125102	1.53975e+06	597083	2.02626e+06	892191	806908	627448	1.36815e+06	1.67707e+06	1.76392e+06	-	-	-	-	-	-	-	-	-	-	-	-	1.00149	0.0631298	0.481858	-1.05332	down	-	-	-	-
Zmhn001793	341.09	179.03	342.095	C15H18O9	[M-H]-	6-O-Caffeoyl-D-glucose*	Phenolic acids	Phenolic acids	-	1	1.78418e+06	4.17236e+06	2.40757e+06	972657	1.67013e+06	1.72968e+06	4.02391e+06	2.36142e+06	1.01177e+06	5.9804e+06	6.0474e+06	7.95036e+06	5.24523e+06	7.98846e+06	5.78446e+06	3.12853e+06	4.04198e+06	3.82512e+06	-	-	1.40584	0.020984	2.70081	1.43339	up	1.39941	0.00824743	4.56908	2.1919	up	1.18966	0.0162226	2.38856	1.25614	up	-	-	-	-
Wbtp003421	437.11	275.06	436.101	C20H20O11	[M+H]+	1,6-dihydroxy-7-methoxy-5-{[(2s,3r,4s,5s,6r)-3,4,5-trihydroxy-6-(hydroxymethyl)oxan-2-yl]oxy}xanthen-9-one	Flavonoids	Other Flavonoids	-	2	83986.3	35462.8	77172.8	32999.2	14195.3	14407.9	13744.9	67129.2	23340	78373.9	8340	77102.4	17017.2	20054.4	23394.2	43345	38616.1	33340	-	-	-	-	-	-	-	-	-	-	-	-	-	-	-	-	-	-	-	-	-
Wcsp002132	332.15	272.13	331.142	C18H21NO5	[M+H]+	tazettine*	Alkaloids	Alkaloids	-	1	1.0657e+06	826395	997004	1.00385e+06	998172	883793	1.89293e+06	9.12051e+06	6.21468e+06	1.40979e+06	1.80942e+06	1.58951e+06	1.90278e+06	1.71138e+06	1.44154e+06	2.40376e+06	2.06751e+06	1.85763e+06	-	-	1.31593	0.187075	0.27912	-1.84104	down	-	-	-	-	-	-	-	-	-	-	1.32648	0.15048	5.96992	2.57771
Wbkp008793	701.37	539.32	700.358	C38H48N6O7	[M+H]+	(3S,3'S)-N,N'-((1R,2R)-4-((3,4,5-trihydroxy-6-methyltetrahydro-2H-pyran-2-yl)oxy)cyclohexane-1,2-diyl)bis(2-methyl-2,3,4,9-tetrahydro-1H-pyrido[3,4-b]indole-3-carboxamide)	Alkaloids	Alkaloids	-	2	71497.3	235341	244770	13797.7	22371.1	44914	6413.1	8678.21	28559.6	13347.8	14108.3	10198.8	32341.4	16138.7	15450.5	57876.5	47082.5	45963.4	-	-	-	-	-	-	-	-	-	-	-	-	1.28214	0.0929481	0.0682639	-3.87273	down	-	-	-	-
Qmxp101615	349.27	179.14	348.266	C22H36O3	[M+H]+	Ent-3β-Acetoxyisopimar-15-8β-ol	Terpenoids	Ditepenoids	-	3	111499	84283.6	111375	43740.1	47059.2	31713.1	28270.2	25892.7	30146.5	30515.9	30444	27794	30123.2	27184.3	23151.7	49856.8	44853.7	38225.9	-	-	-	-	-	-	-	-	-	-	-	-	1.3465	0.0144132	0.288952	-1.7911	down	-	-	-	-
Lmmn000774	343.1	181.05	344.111	C15H20O9	[M-H]-	Dihydrocaffeoylglucose*	Phenolic acids	Phenolic acids	-	2	23174.1	17520.2	21294.3	43806.1	28620.6	19815.6	134837	163489	9122.61	42293.6	58549	48891.2	155084	162505	98694.7	50326.7	65645.8	58292.9	-	-	-	-	-	-	-	-	-	-	-	-	1.30434	0.0164539	2.4155	1.27232	up	-	-	-	-
Wcdn001824	315.07	153.02	316.079	C13H16O9	[M-H]-	2-Hydroxy-5-[3,4,5-Trihydroxy-6-(Hydroxymethyl)Oxan-2-Yl]Oxybenzoic Acid	Others	Others	-	1	2.45e+06	1.22163e+06	2.42585e+06	620364	560345	641257	1.52452e+06	1.44472e+06	1.88471e+06	1.58346e+06	602788	3.14092e+06	1.1295e+06	941983	877949	1.08576e+06	1.30113e+06	1.41508e+06	-	-	-	-	-	-	-	-	-	-	-	-	-	-	-	-	-	1.50973	0.0151429	2.66412	1.41366
Lhmp113003	323.18	291.15	322.168	C20H22N2O2	[M+H]+	Akuammicine	Alkaloids	Plumerane	-	2	441483	710893	136849	493249	255485	1.48441e+06	1.27462e+06	94821	73504.3	127563	150485	59757.8	747881	424241	261465	470064	365183	392938	-	-	-	-	-	-	-	1.19883	0.234741	0.151269	-2.72481	down	-	-	-	-	-	-	-	-	-
mws2208	195.07	177.05	194.058	C10H10O4	[M+H]+	Ferulic Acid	Phenolic acids	Phenolic acids	537-98-4	3	506084	141247	242003	543860	551364	1.26328e+06	239426	193694	45934.8	141952	93104.2	137795	280667	94150.7	75025	236722	255975	305189	C01494	ko00940,ko01100,ko01110	-	-	-	-	-	1.37437	0.108444	0.158088	-2.6612	down	-	-	-	-	-	1.2552	0.112221	0.203118	-2.29961
Hmsn001911	301.09	139.04	302.1	C13H18O8	[M-H]-	Idesin	Phenolic acids	Phenolic acids	20331-85-5	1	5.14595e+06	2.66594e+06	4.57964e+06	968989	1.01603e+06	886417	1.53467e+06	3.28586e+06	3.69099e+06	1.8143e+06	1.07636e+06	3.84202e+06	1.69927e+06	1.3928e+06	1.39551e+06	1.80876e+06	2.16338e+06	2.36632e+06	-	-	-	-	-	-	-	-	-	-	-	-	-	-	-	-	-	1.34936	0.104281	2.96421	1.56765
Wcfp003475	325.14	191.08	324.132	C15H20N2O6	[M+H]+	6,7-dimethyl-4-(2,3,4,5-tetrahydroxypentyl)-1H-quinoxaline-2,3-dione*	Others	Others	-	1	303595	242043	344152	93010.6	115167	89570.1	0	0	0	87211.6	63572.6	184262	159955	157544	82114	130872	126023	160622	-	-	1.74494	0.0941374	#DIV/0!	#DIV/0!	up	-	-	-	-	-	1.17408	0.0190627	0.376546	-1.4091	down	1.53891	0.00646732	0	#DIV/0!
Lszp210010	325.14	191.08	324.132	C15H20N2O6	[M+H]+	Tatarine*	Alkaloids	Alkaloids	-	1	303595	242043	344152	93010.6	115167	89570.1	0	0	0	87211.6	63572.6	184262	159955	157544	82114	130872	126023	160622	-	-	1.74494	0.0941374	#DIV/0!	#DIV/0!	up	-	-	-	-	-	1.17408	0.0190627	0.376546	-1.4091	down	1.53891	0.00646732	0	#DIV/0!
MWSCX015	165.05	91.05	164.047	C9H8O3	[M+H]+	Caffeic aldehyde	Phenolic acids	Phenolic acids	141632-15-7	3	727770	463603	593739	714433	806278	1.76854e+06	192085	200883	105794	292710	218397	156714	289336	101491	99790.6	393546	508234	419982	C10945	ko00940,ko01110	-	-	-	-	-	1.33031	0.120265	0.203031	-2.30023	down	1.24219	0.0226747	0.374105	-1.41848	down	1.42635	0.108917	0.151634	-2.72134
pmp000087	269.1	177.05	268.095	C13H16O6	[M+H]+	2-Feruloyl-sn-glycerol	Phenolic acids	Phenolic acids	-	3	313951	117981	226330	76897.7	93136.6	96211.5	72055.9	114716	57640.2	59692.2	34017.2	72530.9	110045	71199.9	56294.9	95792.9	104021	124488	-	-	-	-	-	-	-	-	-	-	-	-	1.21415	0.0962609	0.252545	-1.98539	down	-	-	-	-
pmn001690	327.14	165.09	328.152	C16H24O7	[M-H]-	3-Hydroxy-4-isopropylbenzylalcohol-3-O-glucoside	Phenolic acids	Phenolic acids	-	2	13844.7	17771.9	8638.67	33377.7	25185.6	64901.6	134767	215749	4521.97	8340	10225.2	3760.33	91098.1	75960.9	38331.3	46562.3	60546.8	58521	-	-	1.10074	0.213143	0.0628821	-3.99121	down	1.30458	0.10494	0.180825	-2.46733	down	-	-	-	-	-	-	-	-	-
Lshp011012	288.12	147.04	287.116	C16H17NO4	[M+H]+	11-Hydroxyvittatine*	Alkaloids	Pyridine alkaloids	-	1	0	0	0	6.61365e+06	8.19886e+06	7.67461e+06	7.6047e+06	6.25901e+06	5.49072e+06	5.88754e+06	4.71328e+06	7.13549e+06	5.45511e+06	5.36623e+06	6.80658e+06	5.7826e+06	4.61725e+06	4.56948e+06	C12194	-	-	-	-	-	-	-	-	-	-	-	1.36022	0.0137055	#DIV/0!	#DIV/0!	up	-	-	-	-
MWSmce194	288.15	213.09	287.152	C17H21NO3	[M+H]+	Galanthamine; Galantamine; Lycoremin; Lycoremine; Jilkon	Alkaloids	Alkaloids	357-70-0	2	1.07073e+07	1.10919e+07	1.05655e+07	1.56499e+07	1.65458e+07	1.38887e+07	5.82459e+06	6.74907e+06	197018	4.95939e+06	6.56984e+06	5.07307e+06	6.11311e+06	5.46977e+06	6.65296e+06	1.0433e+07	8.29103e+06	8.27427e+06	C08526	ko00950,ko01110	-	-	-	-	-	1.41199	0.000938279	0.360259	-1.47289	down	-	-	-	-	-	1.00307	0.0213585	0.277115	-1.85144
pmb2654	460.15	117.9	461.153	C19H27NO12	[M-H]-	Anthranilate-1-O-Sophoroside	Phenolic acids	Phenolic acids	-	3	10608657	7.19234e+06	9.63244e+06	7.19974e+06	5.51272e+06	8.09408e+06	2.54566e+06	7.963e+06	1.97108e+06	2.96223e+06	4.5751e+06	2.294e+06	4.50173e+06	6.77346e+06	4.71288e+06	5.49965e+06	4.16907e+06	4.79523e+06	-	-	-	-	-	-	-	1.24198	0.0231785	0.472512	-1.08158	down	1.24231	0.0120775	0.358371	-1.48048	down	-	-	-	-
Lmrgn03360	327.11	165.06	328.116	C15H20O8	[M-H]-	Cryptamygin B	Phenolic acids	Phenolic acids	24696-05-7	2	23165.2	32136.2	10497.5	59460.3	31270.1	90390.8	215012	430254	15319.5	16361.9	19271.3	30918.6	146116	101279	60366.8	64078	81835.7	82806.5	-	-	1.11658	0.24008	0.100747	-3.3112	down	1.16577	0.147505	0.367443	-1.44441	down	-	-	-	-	-	-	-	-	-
Zmbp002538	205.1	146.06	204.09	C11H12N2O2	[M+H]+	1-Methoxy-indole-3-acetamide	Alkaloids	Plumerane	-	1	1.56198e+07	1.33847e+07	1.57266e+07	2.7161e+06	3.60122e+06	4.1818e+06	5.54481e+06	9.88299e+06	9.09663e+06	4.9744e+06	9.66731e+06	4.32748e+06	3.14305e+06	2.88388e+06	2.78222e+06	9.30709e+06	7.08306e+06	7.91205e+06	-	-	-	-	-	-	-	-	-	-	-	-	1.18475	0.0220036	0.424071	-1.23762	down	1.36853	0.061336	2.33586	1.22395
Yshs000041	459.23	295.22	460.246	C26H36O7	[M-H]-	Vibsanin J	Terpenoids	Ditepenoids	-	1	68100.9	89155.6	91905.7	95308	165599	74892	54017.6	24756	98068.1	23661.6	22708.2	23661.6	21005.2	22003.8	14789.1	62244.1	56049.7	46977.1	-	-	1.22387	0.236656	0.396012	-1.33638	down	1.37323	0.0841815	0.208552	-2.26152	down	1.34117	0.015356	0.281067	-1.83101	down	-	-	-	-
Lakn000379	665.22	383.12	666.237	C28H42O18	[M-H]-	2,5-Dihydroxyphenylacetate ethyl triglucoside	Phenolic acids	Phenolic acids	-	2	200894	259429	202452	988882	395498	382805	212603	465713	214914	270953	219486	264461	301081	275707	376900	296414	239228	315179	-	-	-	-	-	-	-	1.11711	0.232966	0.427177	-1.22709	down	-	-	-	-	-	-	-	-	-
Wtmn002164	579.16	579.16	580.179	C27H32O14	[M-H]-	3,4-dimethoxy-2-[(3,4,5-trihydroxy-6-{[(3,4,5-trihydroxy-6-methyloxan-2-yl)oxy]methyl}oxan-2-yl)oxy]xanthen-9-one	Flavonoids	Other Flavonoids	-	2	694765	1.03676e+06	805585	1.27263e+06	1.09103e+06	1.1576e+06	1.47574e+06	284138	1.16531e+06	1.73781e+06	2.16228e+06	1.43171e+06	1.36028e+06	1.71905e+06	1.564e+06	847892	1.12331e+06	1.02282e+06	-	-	-	-	-	-	-	-	-	-	-	-	1.2586	0.0311328	2.10152	1.07143	up	-	-	-	-
mws1013	177.02	133.03	178.027	C9H6O4	[M-H]-	Esculetin (6,7-Dihydroxycoumarin)	Lignans and Coumarins	Coumarins	305-01-1	2	1.93138e+06	1.56071e+06	2.32018e+06	589024	420661	412140	1.76233e+06	2.3834e+06	1.93875e+06	1.58187e+06	906694	1.66113e+06	591765	512678	296602	969063	1.28486e+06	1.11885e+06	C09263	ko00999,ko01110	-	-	-	-	-	1.31818	0.0558367	2.91857	1.54526	up	-	-	-	-	-	1.50896	0.00884387	4.27934	2.09739
Wccp000991	290.14	147.04	289.131	C16H19NO4	[M+H]+	epi-zephyranthine*	Alkaloids	Alkaloids	-	1	5.2806e+06	4.07982e+06	4.3618e+06	752667	554114	615255	1.28212e+06	796385	1.16394e+06	1.29238e+06	1.18901e+06	1.52083e+06	110104	98099.4	95506	2.49615e+06	2.02873e+06	1.92443e+06	-	-	-	-	-	-	-	1.37222	0.00696746	2.08228	1.05817	up	1.34934	0.00856152	0.29166	-1.77764	down	-	-	-	-
Qmjp081106	279.12	243.1	278.115	C15H18O5	[M+H]+	Chlorantholide E	Terpenoids	Sesquiterpenoids	1372558-36-5	2	43746.9	58135.3	52858.6	137906	191273	139649	218371	64336.4	125646	59381.9	53342.4	61887	134268	122553	145917	98132.6	90111.6	118275	-	-	1.26857	0.223649	0.427598	-1.22567	down	1.40346	0.028294	0.372442	-1.42491	down	-	-	-	-	-	-	-	-	-
MWStz084	288.12	147.05	287.116	C16H17NO4	[M+H]+	3'-Demethoxypiplartine*	Alkaloids	Pyridine alkaloids	130263-10-4	1	165958	103161	231191	8.94547e+06	1.33018e+06	2.79548e+06	2.25276e+06	8.34432e+06	7.81667e+06	7.91636e+06	7.02138e+06	9.46591e+06	7.45032e+06	7.2993e+06	9.30065e+06	7.44166e+06	5.58366e+06	6.74812e+06	C10444	-	-	-	-	-	-	-	-	-	-	-	1.34774	0.00780758	48.7771	5.60813	up	-	-	-	-
Cmbn003996	429.14	193.05	430.147	C19H26O11	[M-H]-	Regaloside G	Phenolic acids	Phenolic acids	120601-64-1	2	127859	66874	92497.8	45357.6	41400.8	46225	40828.7	36794	35113.1	22385.7	26654.4	23490.3	36740.2	27332.6	20934.9	48875.1	48185.7	37475.6	-	-	-	-	-	-	-	-	-	-	-	-	1.31603	0.0552515	0.252516	-1.98555	down	-	-	-	-
MW0136698	163.04	89.04	162.032	C9H6O3	[M+H]+	6-Hydroxycoumarin*	Lignans and Coumarins	Coumarins	6093-68-1	2	1.47257e+06	2.88453e+06	1.63386e+06	3497435	2.01053e+06	1.89966e+06	4.42906e+06	2.50496e+06	1.47014e+06	8.83767e+06	7.2219e+06	1.16731e+07	7.38826e+06	9.28336e+06	16929435	3.07232e+06	3.76315e+06	4.08901e+06	-	-	1.53161	0.0193103	3.29987	1.72241	up	1.35554	0.0229571	3.7438	1.9045	up	1.29782	0.0214629	4.62909	2.21073	up	-	-	-	-
Wchn003741	177.06	133.07	178.063	C10H10O3	[M-H]-	3,4-dihydroxy-3,4-dihydro-2h-naphthalen-1-one	Others	Others	-	2	381964	264492	385739	93918.2	68194.3	90501.4	304725	380350	326200	249739	165278	269628	91220.1	81304.1	58760.8	166745	213337	168947	-	-	-	-	-	-	-	1.34423	0.0390859	2.71024	1.43842	up	-	-	-	-	-	1.51891	0.00383281	4.00325	2.00117
Wccp002723	330.13	270.11	329.126	C18H19NO5	[M+H]+	Lycorine,1-O-acetyl-	Alkaloids	Alkaloids	-	2	263771	451035	158025	1.69813e+06	2.25892e+06	1.95857e+06	8.37614e+06	4.64148e+07	3.16326e+07	7.27584e+06	8.48221e+06	9.46319e+06	8.70446e+06	6.26825e+06	7.24275e+06	8.31694e+06	1.10571e+07	9.38481e+06	-	-	1.21846	0.206363	0.291833	-1.77679	down	1.43365	0.00665378	4.26349	2.09204	up	1.33998	0.00533632	28.8959	4.85279	up	1.41964	0.136231	14.6094	3.86882
Wbmp010544	699.35	699.35	698.341	C37H50N2O11	[M+H]+	10-Hydroxymethyllycaconitine	Alkaloids	Alkaloids	-	1	1.04055e+07	2.4101e+07	2.7967e+07	1.15467e+06	1.85666e+06	1.45059e+06	827195	852485	3.03344e+06	657118	957010	543168	1.84058e+06	887851	591337	5.16564e+06	3.8646e+06	4.44046e+06	-	-	-	-	-	-	-	1.23131	0.042259	0.483491	-1.04844	down	1.32361	0.063519	0.0345314	-4.85595	down	-	-	-	-
Wasn006585	447.22	315.18	448.231	C21H36O10	[M-H]-	Geranyl 3-O-xylopyranosyl-glucopyranoside*	Others	Others	-	2	172338	157462	124002	109670	24024.7	87015.5	13702.9	11866.3	132276	12102.5	20445.3	14205.9	4676.02	6238.35	3443.77	44227.1	56527.6	44391.3	-	-	-	-	-	-	-	1.19072	0.150713	0.211833	-2.239	down	1.34451	0.00926093	0.103027	-3.27891	down	-	-	-	-
Wcgn012576	335.22	253.22	336.23	C20H32O4	[M-H]-	14-hydroxy-14-(hydroxymethyl)-5,9-dimethyltetracyclo[11.2.1.01,10.04,9]hexadecane-5-carboxylic acid	Terpenoids	Ditepenoids	-	3	226587	152932	203812	247869	180057	262773	170492	54817.6	75438.9	68658.8	65882.2	66137.5	67627.9	55362.8	35651.9	132429	159542	120174	-	-	-	-	-	-	-	1.42699	0.023321	0.290544	-1.78317	down	1.33447	0.0277526	0.344022	-1.53943	down	1.22745	0.0466945	0.435427	-1.1995
Jmhp002020	434.18	255.11	433.174	C22H27NO8	[M+H]+	norcoclaurine-6-O-glucoside*	Alkaloids	Isoquinoline alkaloids	-	2	51298.1	36605.8	29270.6	398562	286619	371636	208110	140098	165380	201065	96754.1	251662	163431	183737	199253	153269	204608	172330	-	-	-	-	-	-	-	-	-	-	-	-	1.23133	0.0844299	4.68943	2.22941	up	1.423	0.0160641	0.485977	-1.04104
Yamn004462	523.22	361.16	524.226	C26H36O11	[M-H]-	6-((4-(3-hydroxy-2-(4-(3-hydroxypropyl)-2-methylphenoxy)propoxy)-2-methoxyphenoxy)methyl)tetrahydro-2H-pyran-2,3,4,5-tetraol*	Lignans and Coumarins	Lignans	-	1	485560	548075	379992	162419	126910	369108	180938	484359	19858.6	145952	185155	107600	370045	187649	89498.7	236205	263509	314824	-	-	-	-	-	-	-	-	-	-	-	-	1.28818	0.0111359	0.310341	-1.68807	down	-	-	-	-
Lmmp004965	706.45	706.45	705.445	C39H63NO10	[M+H]+	β1-Solanine	Alkaloids	Steroid alkaloids	142287-76-1	2	2.59585e+06	2.54488e+06	2.46077e+06	615786	1.82352e+06	1.04999e+06	3.40398e+06	2.07505e+06	2.02722e+06	1.74232e+06	1.68368e+06	1.75061e+06	5.2318e+06	4.04768e+06	3.55217e+06	2.709e+06	2.65135e+06	2.04866e+06	-	-	-	-	-	-	-	-	-	-	-	-	-	-	-	-	-	1.17354	0.0834181	2.15122	1.10516
pme2459	449.11	287.06	448.101	C21H20O11	[M+H]+	Luteolin-7-O-glucoside (Cynaroside)	Flavonoids	Flavones	5373-11-5	3	82819.6	32615.6	90035	149765	195140	156760	66055.2	44010.2	37314.6	222168	51420.5	295862	53992	55330.3	67261.9	80605.9	104346	82356.8	C03951	ko00944	1.24686	0.189868	3.86383	1.95003	up	-	-	-	-	-	-	-	-	-	-	1.47202	0.00400268	0.293782	-1.76718
Lsjp211261	209.15	149.09	208.146	C13H20O2	[M+H]+	(6R,9S)-3-Oxo-α-ionol	Terpenoids	Monoterpenoids	-	3	399805	371501	529075	345902	449045	284499	154377	338150	91700	92539.2	242592	113574	562969	413426	243970	271744	203404	259599	-	-	-	-	-	-	-	1.18014	0.0351271	0.415681	-1.26645	down	1.18909	0.0136452	0.345057	-1.53509	down	-	-	-	-
pme1816	353.09	191.06	354.095	C16H18O9	[M-H]-	Neochlorogenic acid (5-O-Caffeoylquinic acid)*	Phenolic acids	Phenolic acids	906-33-2	2	13100.1	13266.7	9274.11	265753	562160	251722	7317.69	5963.94	12433.6	134499	369336	84942.7	110413	33550.5	84932.1	86221.2	116326	106294	C17147	-	1.67537	0.165676	22.8961	4.51703	up	-	-	-	-	-	1.29452	0.170267	16.5197	4.04612	up	1.51814	0.0738753	0.0238184	-5.39178
Wbmp002299	450.18	288.12	449.169	C22H27NO9	[M+H]+	1-(4-((3,4,5-trihydroxy-6-(hydroxymethyl)tetrahydro-2H-pyran-2-yl)oxy)benzyl)-1,2,3,4-tetrahydroisoquinoline-5,6,7-triol	Alkaloids	Alkaloids	-	2	649108	271116	473811	43047.3	92680.6	122358	381172	345294	1.04703e+06	123390	186764	106372	345776	258396	134830	328210	267155	247830	-	-	1.51158	0.18462	0.234862	-2.09012	down	-	-	-	-	-	1.2139	0.0898816	0.298792	-1.74279	down	1.37314	0.155955	6.87172	2.78067
Jmzn003632	521.2	329.14	522.21	C26H34O11	[M-H]-	Manglieside D	Lignans and Coumarins	Lignans	-	2	18145.7	17626.8	15062.8	15959.8	16990.9	38430.5	23166.2	5287.57	1744.11	6133.81	3142.59	9028.97	30975.9	14901.8	12365.2	16666	14114	19095.9	-	-	-	-	-	-	-	1.24645	0.130617	0.256445	-1.96328	down	1.19777	0.0100871	0.360091	-1.47357	down	-	-	-	-
Zmsp001026	260.13	199.07	259.121	C15H17NO3	[M+H]+	Norsanguinine	Alkaloids	Alkaloids	164854-59-5	1	112076	77929.3	110961	233531	204825	193472	355573	138049	3.85897e+06	50443.3	55351.7	50014.4	84061.2	74468.2	58182.2	469129	436054	347168	C12253	-	1.35024	0.365719	0.0357969	-4.80402	down	1.44052	0.00487378	0.246601	-2.01975	down	-	-	-	-	-	-	-	-	-
pme1738	138.08	94.07	137.071	C7H9N2O	[M+H]+	3-Carbamyl-1-methylpyridinium;(1-Methylnicotinamide)	Alkaloids	Pyridine alkaloids	1005-24-9	3	607367	716005	583639	135202	246563	192108	585390	327941	596704	250536	324169	259371	184057	130487	198837	551699	430476	426930	C02918	ko00760,ko01100	-	-	-	-	-	-	-	-	-	-	1.31648	0.00383017	0.437373	-1.19306	down	1.34461	0.0570462	2.6313	1.39578
Hmbp003234	255.09	163.03	254.079	C12H14O6	[M+H]+	1-O-Caffeoylglycerol	Phenolic acids	Phenolic acids	-	3	937501	1.44842e+06	1.19117e+06	1.73528e+06	2.05287e+06	2.17963e+06	1.59682e+06	775207	1.07863e+06	3.9309e+06	2.46204e+06	3.31573e+06	4.3649e+06	4.41834e+06	4.6128e+06	1.72177e+06	1.7398e+06	2.233e+06	-	-	1.59328	0.0213528	2.81357	1.4924	up	-	-	-	-	-	1.28183	0.0300251	2.71412	1.44048	up	-	-	-	-
Lskp211395	387.2	207.14	386.194	C19H30O8	[M+H]+	Corchoionoside C*	Others	Others	-	1	52901.6	44539.3	66448.7	44032.6	25482.1	38345	196810	60586.5	69168.5	78360	77498.5	225185	59935.5	52899.9	28481.4	47330	56685	64595.5	-	-	-	-	-	-	-	1.18621	0.203454	3.53277	1.8208	up	-	-	-	-	-	1.18303	0.238495	3.02768	1.59821
HX1288	387.2	207.14	386.194	C19H30O8	[M+H]+	Citroside A*	Terpenoids	Terpene	120330-44-1	1	52901.6	44539.3	66448.7	44032.6	25482.1	38345	196810	60586.5	69168.5	78360	77498.5	225185	59935.5	52899.9	28481.4	47330	56685	64595.5	-	-	-	-	-	-	-	1.18621	0.203454	3.53277	1.8208	up	-	-	-	-	-	1.18303	0.238495	3.02768	1.59821
MWSHC20159	387.2	207.14	386.194	C19H30O8	[M+H]+	Roseoside*	Others	Ketone compounds	54835-70-0	1	52901.6	44539.3	66448.7	44032.6	25482.1	38345	196810	60586.5	69168.5	78360	77498.5	225185	59935.5	52899.9	28481.4	47330	56685	64595.5	-	-	-	-	-	-	-	1.18621	0.203454	3.53277	1.8208	up	-	-	-	-	-	1.18303	0.238495	3.02768	1.59821
pmb2871	315.07	153.02	316.079	C13H16O9	[M-H]-	1-O-Gentisoyl-β-D-glucoside*	Phenolic acids	Phenolic acids	23445-11-6	2	2.23403e+06	1.65784e+06	2.1022e+06	815821	746548	568959	1.33194e+06	1.32543e+06	1.7011e+06	1.32082e+06	521207	4.41809e+06	977573	828804	1.37011e+06	889227	1.1459e+06	1.19986e+06	-	-	-	-	-	-	-	-	-	-	-	-	-	-	-	-	-	1.42816	0.0116632	2.04495	1.03207
pmn001367	315.07	153.02	316.079	C13H16O9	[M-H]-	Protocatechuic acid-4-O-glucoside*	Phenolic acids	Phenolic acids	-	2	2.23403e+06	1.65784e+06	2.1022e+06	815821	746548	568959	1.33194e+06	1.32543e+06	1.7011e+06	1.32082e+06	521207	4.41809e+06	977573	828804	1.37011e+06	889227	1.1459e+06	1.19986e+06	-	-	-	-	-	-	-	-	-	-	-	-	-	-	-	-	-	1.42816	0.0116632	2.04495	1.03207
Lakn001671	329.09	123.05	330.095	C14H18O9	[M-H]-	2-β-D-Glucopyranosyloxy-5-hydroxy-phenylacetic acid	Phenolic acids	Phenolic acids	-	2	252813	135263	137185	38048.8	23080.5	52558.5	55022.7	108614	37932.6	58397.2	56933.7	76819.9	31024.5	22267.5	37698.6	45690.5	60967.9	60155.6	-	-	-	-	-	-	-	-	-	-	-	-	1.25114	0.100081	0.36582	-1.45079	down	-	-	-	-
pme0066	116.05	74.02	117.054	C3H7N3O2	[M-H]-	Guanidinoacetate	Alkaloids	Alkaloids	352-97-6	3	32122.3	25016.2	32128.7	5020.47	6659.79	4431.01	11389.3	12805.6	14348.1	18691.5	11175.2	13030.7	6599.06	6202.64	9273.73	12908	10720.7	14680	C00581	ko00260,ko00330,ko01100	-	-	-	-	-	1.34479	0.0489221	2.66257	1.41282	up	1.23785	0.00922476	0.48055	-1.05724	down	1.46475	0.00285018	2.3923	1.2584
Jmhp002680	300.16	107.05	300.159	C18H22NO3+	[M]+	Norlotusine	Alkaloids	Isoquinoline alkaloids	-	1	69883.4	36906.8	36926.2	23299.4	21510.7	26208.7	28682.5	47566.7	83506.9	25700.8	17475.5	27565	18935.5	16068	20826.9	19099.3	24964.5	19395.1	-	-	1.28384	0.202891	0.442808	-1.17525	down	-	-	-	-	-	1.1117	0.14921	0.492228	-1.0226	down	1.15347	0.206463	2.24949	1.1696
MWSHC20175	313.1	151.04	314.1	C14H18O8	[M-H]-	Methylsalicylate-2-O-glucoside	Phenolic acids	Phenolic acids	10019-60-0	3	968.934	7951.54	3313.64	51556.2	44673.5	171147	91718.7	2560.18	1824.79	106129	10551.3	136407	4655.15	10271.5	3489.15	47007.5	48100.7	35734.8	-	-	-	-	-	-	-	-	-	-	-	-	1.11703	0.168125	20.687	4.37065	up	-	-	-	-
Zmln000899	343.11	181.05	344.111	C15H20O9	[M-H]-	Syringaldehyde-4-O-glucoside	Phenolic acids	Phenolic acids	-	2	10600	15717.9	25428.9	40545.6	36312.6	48130.1	112107	165951	21559.5	36934.7	37704.6	76420.3	97860.2	203266	82637.5	57341.1	78097.5	73834.1	-	-	-	-	-	-	-	-	-	-	-	-	1.1401	0.114797	2.91921	1.54558	up	-	-	-	-
Zbfn002396	343.1	163.04	344.111	C15H20O9	[M-H]-	Caffeoyl-O-mannitol	Phenolic acids	Phenolic acids	-	2	5870.36	4613.68	12235	12115	5298.2	5978.01	78289.4	88878.5	8616.41	4741.3	8437.21	6246.04	21170.7	17103.6	6689.75	14470.9	19730.2	16470	-	-	1.35366	0.174045	0.110502	-3.17785	down	-	-	-	-	-	-	-	-	-	-	1.12828	0.180242	7.51499	2.90977
Qmyp101232	225.15	95.08	224.141	C13H20O3	[M+H]+	Vomifoliol (Blumenol A)*	Terpenoids	Monoterpenoids	189351-15-3	2	70635.9	52265	20005	18340	37325.8	43139.2	64437.6	38823.9	45623.1	110285	59280.6	53725.3	30289.8	46818.9	13340	49369.5	53238.1	66285.4	C04166	-	-	-	-	-	-	1.10844	0.134196	2.25991	1.17627	up	-	-	-	-	-	-	-	-	-
Lahp002608	188.07	118.07	187.063	C11H9NO2	[M+H]+	3,5-Dihydro-2H-Furo[3,2-C]Quinolin-4-One*	Alkaloids	Quinoline alkaloids	-	1	7.35299e+06	6.81613e+06	7.24754e+06	1.29888e+06	1.91329e+06	1.73113e+06	2.73852e+06	4.17805e+06	3.98695e+06	2.13297e+06	4.25006e+06	2.0549e+06	1.42047e+06	1.27009e+06	1.28131e+06	4.38421e+06	3.38344e+06	3.34152e+06	-	-	-	-	-	-	-	-	-	-	-	-	1.22094	0.0220143	0.393989	-1.34377	down	1.40865	0.033876	2.20572	1.14125
Hmmp001310	188.07	118.07	187.063	C11H9NO2	[M+H]+	3-Indoleacrylic acid*	Alkaloids	Plumerane	1204-06-4	1	7.35299e+06	6.81613e+06	7.24754e+06	1.29888e+06	1.91329e+06	1.73113e+06	2.73852e+06	4.17805e+06	3.98695e+06	2.13297e+06	4.25006e+06	2.0549e+06	1.42047e+06	1.27009e+06	1.28131e+06	4.38421e+06	3.38344e+06	3.34152e+06	C21283	-	-	-	-	-	-	-	-	-	-	-	1.22094	0.0220143	0.393989	-1.34377	down	1.40865	0.033876	2.20572	1.14125
Lahp001956	188.07	118.07	187.063	C11H9O2N	[M+H]+	Pyran[3,4-b]indole-2-ketone	Alkaloids	Plumerane	-	3	7.35299e+06	6.81613e+06	7.24754e+06	1.29888e+06	1.91329e+06	1.73113e+06	2.73852e+06	4.17805e+06	3.98695e+06	2.13297e+06	4.25006e+06	2.0549e+06	1.42047e+06	1.27009e+06	1.28131e+06	4.38421e+06	3.38344e+06	3.34152e+06	-	-	-	-	-	-	-	-	-	-	-	-	1.22094	0.0220143	0.393989	-1.34377	down	1.40865	0.033876	2.20572	1.14125
Hmtn001302	299.08	137.02	300.084	C13H16O8	[M-H]-	Glucosyloxybenzoic acid	Phenolic acids	Phenolic acids	-	1	761246	1.4638e+06	746045	1.44646e+06	1.53503e+06	2.51831e+06	190494	1.6016e+06	1.61867e+06	237367	1.24437e+06	504120	1.84045e+06	3.47209e+06	2.15712e+06	964896	1.28806e+06	1.30541e+06	-	-	-	-	-	-	-	1.09522	0.0634151	0.361079	-1.46961	down	-	-	-	-	-	-	-	-	-
Lacp004926	433.11	271.06	432.105	C21H20O10	[M+H]+	3,8-Dihydroxy-1-methoxy-9,10-anthraquinone glucoside	Quinones	Anthraquinone	-	2	36502.1	16433.4	41379.3	15079.7	7145.29	6127.29	23956.9	3745.1	5254.2	9874.74	21944.2	8824.2	9989.15	5255.38	12978.3	10041.1	7239.12	9020	-	-	-	-	-	-	-	-	-	-	-	-	-	-	-	-	-	-	-	-	-
Lmsn002247	299.08	137.02	300.084	C13H16O8	[M-H]-	1-O-Salicyloyl-β-D-glucose*	Phenolic acids	Phenolic acids	60517-74-0	1	1.17819e+06	618389	1.11208e+06	240172	301607	281589	101792	154991	241626	291669	132597	513786	360384	236163	160294	305197	402615	416917	-	-	-	-	-	-	-	-	-	-	-	-	1.12657	0.0438285	0.322504	-1.63261	down	-	-	-	-
Wcjp001060	284.1	152.06	283.084	C16H13NO4	[M+H]+	Asiaticumine A	Alkaloids	Alkaloids	-	1	6.86611e+06	9.08825e+06	8.33134e+06	6.1599e+06	1.18184e+07	1.36893e+07	3.14882e+06	4.62233e+06	2.8066e+06	8.44975e+06	1.30597e+07	8.1549e+06	1.42753e+07	1.90622e+07	1.90855e+07	7.63707e+06	5.74455e+06	7.81462e+06	-	-	1.62229	0.0446756	2.8044	1.48769	up	-	-	-	-	-	-	-	-	-	-	1.33902	0.0822644	0.334025	-1.58197
MWSmce018	288.12	147.04	287.116	C16H17NO4	[M+H]+	Lycorine*	Alkaloids	Isoquinoline alkaloids	476-28-8	1	47257.2	71049.4	190769	7.20392e+06	7.30542e+06	1.59298e+06	6.67936e+06	5.05336e+06	4.64655e+06	6.49397e+06	5.5055e+06	5.35555e+06	4.87575e+06	4.75217e+06	6.21633e+06	5.51607e+06	4.27954e+06	4.13159e+06	C08532	ko00950	-	-	-	-	-	-	-	-	-	-	1.33912	0.00350114	56.1514	5.81125	up	-	-	-	-
pmb3041	521.09	329.2	522.101	C23H22O14	[M-H]-	Tricin-7-O-saccharic acid	Flavonoids	Flavones	-	3	26180.3	18230.6	15792	33551.8	14129.8	33643.9	17893.3	11806.7	1943.22	2664.71	7336.95	6270.65	18708.7	21543.1	11174.8	13396.5	17579.3	13358.4	-	-	-	-	-	-	-	1.28486	0.0729467	0.200089	-2.32129	down	1.22366	0.0276361	0.270291	-1.88741	down	-	-	-	-
Wayp003039	336.2	318.19	335.194	C15H29NO7	[M+H]+	N-(1-Deoxy-1-fructosyl)Aminononanoic acid	Alkaloids	Alkaloids	-	3	74344.1	49470.2	108885	186478	112342	151203	342910	368914	508537	194719	92391.7	285775	93086.4	93068.2	130532	208517	230510	165042	-	-	1.3493	0.0471144	0.469439	-1.09099	down	-	-	-	-	-	-	-	-	-	-	1.43304	0.0246071	2.71177	1.43924
pmp001162	415.1	245.01	414.095	C21H18O9	[M+H]+	Pinnatifinoside A	Flavonoids	Flavones	-	2	60415.3	59760.7	74882.9	14662.7	18340	9799.5	28719.7	25594	9745.84	24032.5	10781.1	46399.4	56198.7	73036.1	55327.5	36631	28091.5	27279.8	-	-	-	-	-	-	-	-	-	-	-	-	1.06568	0.0491205	0.416351	-1.26413	down	-	-	-	-
Hmqn004417	479.26	337.23	480.272	C26H40O8	[M-H]-	Pharboside A	Terpenoids	Ditepenoids	-	2	3122.07	3565.51	4877.37	3209.35	2724.06	2564.08	4210.08	3241	7303.52	4657.29	3529.91	4733.64	12979	10277.2	7512.58	6181.98	5183.88	4375.62	-	-	-	-	-	-	-	-	-	-	-	-	-	-	-	-	-	-	-	-	-
Lhyp112510	357.13	151.08	358.142	C20H22O6	[M-H]-	Menispermacide	Terpenoids	Ditepenoids	-	2	6731.79	16627.1	3956.57	5291.11	7937.3	31081.8	7768.22	5034.84	1150.98	21403.9	9887.68	38362.4	21781.8	9237.32	4359.58	18027.9	12706.5	16106.9	-	-	1.35539	0.147823	4.99167	2.31952	up	-	-	-	-	-	-	-	-	-	-	-	-	-	-
Wmzn000627	363.25	281.25	364.261	C22H36O4	[M-H]-	Ajugalaevigatic acid	Terpenoids	Ditepenoids	-	3	91863.5	83409.7	114780	146855	159815	172624	149856	59049.2	118808	50817.5	46099.9	41786.4	35195.9	31029.6	21746.9	74183.2	95161.8	105334	-	-	1.4238	0.140516	0.423248	-1.24043	down	1.43723	0.00186055	0.289392	-1.78891	down	1.29986	0.0258238	0.478202	-1.06431	down	-	-	-	-
Wccp001153	290.14	147.04	289.131	C16H19NO4	[M+H]+	4a-Dehydroxycrinamabine*	Alkaloids	Alkaloids	-	1	5.11219e+06	4.16381e+06	4.41662e+06	680368	552811	614408	1.28131e+06	744715	1.07198e+06	1.30528e+06	1.19205e+06	1.41632e+06	114136	112621	108244	2.64682e+06	1.99394e+06	1.97479e+06	-	-	-	-	-	-	-	1.41013	0.00213123	2.11825	1.08287	up	1.35612	0.00547328	0.285822	-1.80681	down	-	-	-	-
Lmmn002260	551.21	389.17	552.221	C27H36O12	[M-H]-	5'-Methoxyisolariciresinol-9'-O-glucoside	Lignans and Coumarins	Lignans	-	3	195351	327890	192774	82609.1	56497	114547	93777.8	147832	29987.8	61197.9	63795.2	102645	159334	63151.2	43479.4	107433	97344.6	136320	-	-	-	-	-	-	-	-	-	-	-	-	1.25584	0.0573575	0.317923	-1.65325	down	-	-	-	-
Zmhn001358	299.08	137.02	300.084	C13H16O8	[M-H]-	4-O-Glucosyl-4-hydroxybenzoic acid*	Phenolic acids	Phenolic acids	-	1	1.23164e+06	609013	1.03699e+06	244838	304736	203868	175807	170031	184667	223765	150346	471020	292452	271894	153176	265090	372538	363145	-	-	-	-	-	-	-	-	-	-	-	-	1.18313	0.0464501	0.293689	-1.76764	down	-	-	-	-
Lacp001298	168.1	91.05	167.095	C9H13NO2	[M+H]+	4-Hydroxy-3-methoxy-β-phenethylamine	Alkaloids	Phenolamine	-	2	1.96572e+06	1.56417e+06	2.20375e+06	71177.7	63870.6	67797	47558.5	45567.9	40543.5	32802.8	29604.4	43934.9	65117.7	56394.9	48924.5	443987	350440	505480	-	-	-	-	-	-	-	-	-	-	-	-	1.35972	0.00972502	0.018547	-5.75267	down	-	-	-	-
Lalp004159	361.15	181.09	360.142	C16H24O9	[M+H]+	Plantarenaloside	Terpenoids	Monoterpenoids	72396-01-1	2	61407.2	59445.9	65020	110395	100972	302258	56489.8	41954.4	29419.3	0	0	0	82294.4	47269.8	45304.5	69866.2	101014	90388	-	-	1.75464	0.0320671	0	#DIV/0!	down	1.43996	0.120726	0	#DIV/0!	down	1.36125	0.000693517	0	#DIV/0!	down	1.29668	0.18739	0.248943	-2.00611
Lmyn003971	521.2	359.15	522.21	C26H34O11	[M-H]-	Dihydrodehydrodiconiferyl alcohol-4-O-glucoside	Lignans and Coumarins	Lignans	-	2	31950.5	22387.5	24579.5	41360.6	34083.6	16272.6	6200.43	8524.43	3100.22	8731.73	33011.1	20029.3	10460.3	9299.49	7418.81	8529.26	6974.32	10082	-	-	1.33233	0.166716	3.46546	1.79305	up	-	-	-	-	-	-	-	-	-	-	1.37453	0.0748188	0.194349	-2.36328
Qmyp101438	211.17	135.12	210.162	C13H22O2	[M+H]+	Blumenol C	Terpenoids	Monoterpenoids	-	2	204532	107646	145389	8858.95	10005	30010	165420	243282	37947.6	34308.9	19018.3	73333	35565.4	19152.1	15591.2	101489	70824.1	82374.2	-	-	1.14697	0.211362	0.283578	-1.81818	down	-	-	-	-	-	1.17954	0.0389211	0.276812	-1.85302	down	1.3103	0.155431	9.13881	3.19201
mws0017	146.17	72.08	145.158	C7H19N3	[M+H]+	Spermidine	Alkaloids	Alkaloids	124-20-9	3	220656	339211	331329	583502	238932	303691	147487	171243	187434	205497	190111	281901	219736	188462	150718	171236	214152	149455	C00315	ko00330,ko00410,ko00480,ko00940,ko01100,ko02010	-	-	-	-	-	-	-	-	-	-	-	-	-	-	-	1.23713	0.188501	0.449474	-1.15369
Wcdp003705	561.21	399.16	560.201	C27H32N2O11	[M+H]+	mappiodoside C	Alkaloids	Alkaloids	-	2	82481.3	196160	65729.1	104809	51077	364539	212980	40742.3	28493.5	17790	58350	65238	168503	117892	81588.2	115451	153411	110494	-	-	-	-	-	-	-	-	-	-	-	-	-	-	-	-	-	-	-	-	-
pme2268	138.06	94.07	137.048	C7H7NO2	[M+H]+	Trigonelline	Alkaloids	Pyridine alkaloids	535-83-1	1	609391	657678	548233	125645	229014	159676	556316	309839	612054	239450	333581	223774	181376	115648	198975	497668	372801	359157	C01004	ko00760	-	-	-	-	-	-	-	-	-	-	1.28974	0.00194457	0.438938	-1.18791	down	1.35358	0.0624925	2.87402	1.52307
Wajp001786	368.1	206.04	367.09	C16H17NO9	[M+H]+	Xanthurenate-8-O-beta-D-glucoside	Alkaloids	Alkaloids	-	2	600068	318812	418959	184659	113004	177749	300955	61022.6	422232	465369	284396	579034	615620	610392	206638	291771	283199	392345	-	-	-	-	-	-	-	1.26671	0.0715385	2.79504	1.48287	up	-	-	-	-	-	-	-	-	-
pmp000086	269.1	177.05	268.095	C13H16O6	[M+H]+	1-Feruloyl-sn-glycerol	Phenolic acids	Phenolic acids	-	3	79265.4	114243	107819	32171.4	80162.2	67990	28593.8	13471.8	19332.7	21908.8	27584.4	33340	20721.1	16030.1	9062.53	43622.9	48313.5	33006.7	-	-	-	-	-	-	-	1.09039	0.146747	0.459358	-1.12231	down	1.31724	0.0147024	0.274894	-1.86305	down	1.27485	0.099954	0.34049	-1.55431
pmn001518	331.07	169.01	332.074	C13H16O10	[M-H]-	1-O-Galloyl-β-D-glucose	Phenolic acids	Phenolic acids	58511-73-2	3	46573.3	29431.9	47935.3	10533.7	8117.4	9760.83	16156.6	13594.9	6918.27	5484.67	12196.1	13220.1	9367.38	10070.3	7835.37	14781.2	17850.9	21597.1	C01158	ko00999	-	-	-	-	-	-	-	-	-	-	1.25252	0.0225142	0.249321	-2.00393	down	-	-	-	-
Zmcp102703	521.2	131.05	520.194	C26H32O11	[M+H]+	saikolignanoside D*	Lignans and Coumarins	Lignans	-	1	1.52197e+06	2.67551e+06	443477	1.51497e+06	1018635	6.41387e+06	2.91231e+06	292905	218283	419885	421256	358636	2.35146e+06	2.09454e+06	877654	1.86991e+06	1.3051e+06	1.83696e+06	-	-	-	-	-	-	-	1.21462	0.272374	0.134091	-2.89871	down	-	-	-	-	-	-	-	-	-
Cmsp003083	521.2	131.05	520.194	C26H32O11	[M+H]+	Dehydrodiconiferyl alcohol-4-O-glucoside*	Lignans and Coumarins	Lignans	107870-88-2	1	1.52197e+06	2.67551e+06	443477	1.51497e+06	1018635	6.41387e+06	2.91231e+06	292905	218283	419885	421256	358636	2.35146e+06	2.09454e+06	877654	1.86991e+06	1.3051e+06	1.83696e+06	-	-	-	-	-	-	-	1.21462	0.272374	0.134091	-2.89871	down	-	-	-	-	-	-	-	-	-
Hmdp000626	166.08	148.07	165.079	C9H11NO2	[M+H]+	Polygonatine A	Alkaloids	Alkaloids	-	3	344920	351670	329858	2.05733e+06	1.09958e+06	1.5198e+06	1.83771e+06	722758	322052	1.89013e+06	438932	1.95351e+06	1.43793e+06	1.35723e+06	911564	742643	1.0727e+06	844894	-	-	-	-	-	-	-	-	-	-	-	-	1.05302	0.159426	4.17223	2.06082	up	-	-	-	-
mws2108	353.09	191.06	354.095	C16H18O9	[M-H]-	Cryptochlorogenic acid (4-O-Caffeoylquinic acid)*	Phenolic acids	Phenolic acids	905-99-7	2	24182.8	23227.2	30513.2	4153.48	5793.31	11675.4	12223.2	4511.61	16099.5	7264.15	14242.2	8157.34	9211.16	7612.14	14903.7	12027.5	17759.3	15202.5	-	-	-	-	-	-	-	-	-	-	-	-	1.23723	0.00712045	0.380679	-1.39335	down	-	-	-	-
Zmwp002109	278.16	260.15	277.168	C16H23NO3	[M+H]+	Latifoliumin B	Alkaloids	Alkaloids	-	3	288084	116995	120988	61191.9	60597.1	82830.2	25484	124335	78874.6	52817.8	41234.6	48854.6	59237.8	46347.7	21643.6	97975.9	67393.3	94901.3	-	-	-	-	-	-	-	-	-	-	-	-	1.23306	0.151229	0.271652	-1.88017	down	-	-	-	-
Labp004779	538.23	175.07	537.221	C26H35NO11	[M+H]+	6,7-di-O-methyl-N-deacetylisoipecosidic acid	Alkaloids	Isoquinoline alkaloids	-	2	100040	136735	19309.5	165100	72912.9	906210	180700	36505.2	23340	29291.4	44319.9	23656.1	188106	118608	23948.4	93783.9	83025.4	120872	-	-	-	-	-	-	-	1.15095	0.316764	0.0850074	-3.55627	down	-	-	-	-	-	-	-	-	-
Lsmp121707	505.27	211.17	504.257	C24H40O11	[M+H]+	Cuneataside E*	Others	Others	-	3	45010	21675	41680	19068.8	56685	9850.92	8953.16	60020	1670	6670	7173.38	5597.83	18340	2727.98	8340	13340	9015.97	10805.4	-	-	-	-	-	-	-	1.08832	0.263455	0.227104	-2.13857	down	1.3117	0.0549126	0.179405	-2.47871	down	-	-	-	-
HX1367	147.04	91.06	146.037	C9H6O2	[M+H]+	coumarin	Lignans and Coumarins	Coumarins	-	1	2.16406e+06	2.31983e+06	2.49526e+06	1.18253e+06	1.12633e+06	1.00428e+06	1.36021e+06	2.68875e+06	1.74318e+06	2.79159e+06	1.65592e+06	1.91626e+06	1.38535e+06	1.25813e+06	905742	2.34159e+06	1.96672e+06	1.57057e+06	-	-	-	-	-	-	-	-	-	-	-	-	-	-	-	-	-	-	-	-	-
Wbjp001317	203.08	130.07	202.074	C11H10N2O2	[M+H]+	vasicinone	Alkaloids	Alkaloids	486-64-6	1	5.99845e+06	4.33428e+06	4.90352e+06	1.79087e+06	1.86565e+06	1.90939e+06	2.93451e+06	3.06874e+06	3.71603e+06	3.61549e+06	2.1654e+06	3.49548e+06	2.81436e+06	2.70591e+06	2.32208e+06	3.39607e+06	2.64708e+06	2.31976e+06	-	-	-	-	-	-	-	-	-	-	-	-	-	-	-	-	-	-	-	-	-
MWSHC20125	335.08	135.05	336.084	C16H16O8	[M-H]-	5-O-Caffeoylshikimic acid	Phenolic acids	Phenolic acids	73263-62-4	2	26895.6	22442.3	17999.7	1203.4	801.462	6818.88	9188.66	2012.81	1199.39	1997.79	8004.73	1601.86	7188.59	19073.9	29512.1	9328.31	13906.1	11423.2	-	-	-	-	-	-	-	-	-	-	-	-	1.20502	0.00557405	0.172331	-2.53674	down	-	-	-	-
Hmgp002327	188.07	118.06	187.063	C11H9NO2	[M+H]+	3-amino-2-naphthoic acid*	Alkaloids	Alkaloids	-	1	7.07004e+06	6.1508e+06	6.83564e+06	1.32542e+06	1.74211e+06	1.91691e+06	2.80923e+06	4.18516e+06	3.97045e+06	2.27225e+06	3.9606e+06	2.09341e+06	1.29138e+06	1.45859e+06	1.20238e+06	4.51834e+06	3.16334e+06	3.35277e+06	-	-	-	-	-	-	-	-	-	-	-	-	1.23828	0.0111957	0.415141	-1.26833	down	1.4234	0.0292538	2.19981	1.13738
Smcp001137	188.07	118.06	187.063	C11H9NO2	[M+H]+	naphthisoxazol A*	Alkaloids	Alkaloids	-	1	7.07004e+06	6.1508e+06	6.83564e+06	1.32542e+06	1.74211e+06	1.91691e+06	2.80923e+06	4.18516e+06	3.97045e+06	2.27225e+06	3.9606e+06	2.09341e+06	1.29138e+06	1.45859e+06	1.20238e+06	4.51834e+06	3.16334e+06	3.35277e+06	-	-	-	-	-	-	-	-	-	-	-	-	1.23828	0.0111957	0.415141	-1.26833	down	1.4234	0.0292538	2.19981	1.13738
mws0178	353.09	191.06	354.095	C16H18O9	[M-H]-	Chlorogenic acid (3-O-Caffeoylquinic acid)*	Phenolic acids	Phenolic acids	327-97-9	2	20126.3	7911.32	14300.1	235620	511987	274103	7064.51	7363.37	12182.6	142317	369732	76846.3	94280.2	38195.3	75397	85758.6	111770	129718	C00852	ko00940,ko00941,ko00945,ko01110	1.67238	0.169058	22.1302	4.46795	up	-	-	-	-	-	1.25433	0.176319	13.9095	3.798	up	1.5214	0.0616228	0.026045	-5.26285
Lskp211262	363.18	137.06	362.173	C20H26O6	[M+H]+	Secoisolariciresinol	Lignans and Coumarins	Lignans	29388-59-8	1	939453	304217	701027	35010	2591.24	13340	8383.42	6446.82	3220.34	14787.1	20597	15005	23340	25054.7	9646.3	189692	173474	252895	C18167	ko00999,ko01100,ko01110	1.52445	0.0126741	2.79155	1.48107	up	-	-	-	-	-	1.33965	0.0763423	0.025911	-5.27029	down	-	-	-	-
pmp001269	286.31	268.3	285.303	C18H39NO	[M+H]+	Hexadecyl ethanolamine	Alkaloids	Alkaloids	-	3	19998.5	52330.4	59214.4	38956.3	76113.1	135806	142294	70188.6	55813.7	78842.5	80140.3	106392	72173.7	67554.8	38842.7	246369	181850	169928	-	-	-	-	-	-	-	-	-	-	-	-	1.02826	0.0458244	2.01739	1.01249	up	-	-	-	-
Lhhp120825	345.16	137.1	344.147	C16H24O8	[M+H]+	Multiflotriol glucoside*	Others	Others	-	2	38345	79355.6	98370	56973.7	53350	77781.9	35915	26207.2	7087.73	34705.8	26649.2	21806	87819.7	120055	43812.7	60020	60268	84573.8	-	-	-	-	-	-	-	1.33399	0.0272646	0.442098	-1.17756	down	1.09245	0.123861	0.384879	-1.37752	down	1.1522	0.0258018	0.367931	-1.44249
Zbzp002804	307.18	177.06	306.169	C15H22N4O3	[M+H]+	N-Feruloylagmatine	Alkaloids	Phenolamine	-	2	65392.6	76690	65125.8	9802.9	15973	21172.5	55207.7	48915.9	46382.9	49788.2	48242	82806.5	30361.9	25005	12979	53350	35413.7	50690.5	C18325	ko00330,ko01100	-	-	-	-	-	1.33426	0.0488569	3.85182	1.94554	up	-	-	-	-	-	1.44629	0.00146995	3.20579	1.68068
pma0948	138.09	120.08	137.084	C8H11NO	[M+H]+	Phenylethanolamine	Alkaloids	Alkaloids	7568-93-6	3	77718.8	71350	87261.9	25835.3	62023.5	68592	52095.4	41161.7	44232.8	30535.1	42849.2	42032.3	71589.7	62877.2	45997.7	62231.3	75352.2	49355.1	C02735	-	-	-	-	-	-	-	-	-	-	-	1.29215	0.00293617	0.488369	-1.03396	down	-	-	-	-
Lskp211278	245.11	84.04	244.106	C10H16N2O5	[M+H]+	Oxypinnatanine A	Alkaloids	Alkaloids	-	2	196388	124505	79671.4	122776	151521	163237	523527	404343	150765	227979	87604.9	221741	367950	365927	225873	226934	246603	161442	-	-	-	-	-	-	-	-	-	-	-	-	-	-	-	-	-	1.11003	0.189994	2.46526	1.30174
MW0130123	363.07	311.07	304.058	C15H12O7	[M+CH3COO]-	Dihydroquercetin	Others	Ketone compounds	98006-93-0	3	123004	122096	140939	4583.6	5623.04	6530.26	4357.65	18977.9	20523.4	27893.7	41164.3	40974.2	37807.9	45071.5	38591.4	33592.3	49625.9	50203.9	-	-	1.28418	0.032256	2.50877	1.32698	up	1.42757	0.0180489	6.57423	2.71682	up	1.3328	0.000451465	0.285028	-1.81082	down	-	-	-	-
Lmnp002845	463.13	343.09	462.116	C22H22O11	[M+H]+	Hispidulin-8-C-glucoside*	Flavonoids	Flavones	-	3	151196	86126.6	122737	28681.4	80025	37721.9	55848.1	15161	88365	41061.6	38746.6	46584.7	55323.6	38062.2	34103.5	48345	53540.9	71883.9	-	-	-	-	-	-	-	-	-	-	-	-	1.30222	0.051823	0.351033	-1.51032	down	-	-	-	-
pma3724	369.12	177.05	368.111	C17H20O9	[M+H]+	1-O-Feruloylquinic acid	Phenolic acids	Phenolic acids	-	3	5005	3340	4941.14	88365	15438.3	14248.9	2941.7	10005	6670	9882.27	69753.1	13340	27774.3	24163.3	46920.7	26561.1	17087.5	22954.8	-	-	1.17584	0.334468	4.7396	2.24477	up	-	-	-	-	-	1.07166	0.304492	6.99792	2.80693	up	1.14581	0.312258	0.16617	-2.58927
Zmsp002469	348.18	288.16	347.173	C19H25NO5	[M+H]+	O-Methyllycorenine N-oxide	Alkaloids	Plumerane	-	2	80860.7	96673.1	83409.4	1.80344e+06	417029	418893	285993	842203	833054	240446	135830	299193	248563	202793	350642	251609	391380	338071	-	-	1.33175	0.137581	0.344408	-1.53781	down	1.07361	0.291534	0.255921	-1.96623	down	1.19223	0.100132	2.58857	1.37216	up	-	-	-	-
Wagp001741	429.19	267.14	428.18	C19H28N2O9	[M+H]+	N-(gamma-L-glutamyl)tyramine O-glucoside	Alkaloids	Phenolamine	-	3	114880	81846	83712.7	24937.5	19097.9	23122.6	104469	26551.5	17600.3	13215.5	14245.7	10171.3	22955.6	16257.2	14746.4	20221.1	31483	27412	-	-	1.24212	0.311805	0.253212	-1.98158	down	-	-	-	-	-	1.34695	0.01609	0.134192	-2.89763	down	-	-	-	-
Wbtn002952	300.11	138.06	301.116	C13H19NO7	[M-H]-	1-(β-D-Glucopyranosyl)-3-ethyl-4-methyl-1H-pyrrole-2,5-dione	Others	Ketone compounds	-	3	62547.8	109262	58216.1	96703.1	119910	190799	16496.7	112335	119683	22977.5	100815	35516.2	116153	232171	139538	65541.7	92963.8	101395	-	-	-	-	-	-	-	1.07446	0.0919322	0.391026	-1.35466	down	-	-	-	-	-	-	-	-	-
Cmzn004594	449.11	287.06	450.116	C21H22O11	[M-H]-	Dunalianoside C*	Phenolic acids	Phenolic acids	-	3	126108	56065.6	90475.7	40594.4	18838.9	26299.7	46254.7	21178.7	44296.4	78416.6	27837.1	164872	73867.6	79183.8	52923.1	45236.7	46269.5	65350.6	-	-	-	-	-	-	-	-	-	-	-	-	-	-	-	-	-	-	-	-	-
Cmjn004337	401.14	269.1	402.153	C18H26O10	[M-H]-	Benzyl-(2''-O-xylosyl)glucoside	Phenolic acids	Phenolic acids	-	3	80905.6	50529.4	57629.6	109829	70889.2	66734.3	72210.4	97867.4	46714.7	35063.8	9606.41	61887.5	27436	20020.9	10849.6	69894.8	45204.4	64594.7	-	-	1.08685	0.156843	0.491519	-1.02468	down	1.0065	0.0833424	0.43062	-1.21551	down	-	-	-	-	-	-	-	-	-
pmb2975	477.14	357.1	478.147	C23H26O11	[M-H]-	Hesperetin-3'-O-glucuronide	Flavonoids	Flavanones	1237479-05-8	3	145516	117211	196583	37686.7	20946.7	30303.2	114484	293811	242065	126596	52011	151318	29367.4	24064.6	14869.7	48315.1	75771.1	59821.8	-	-	-	-	-	-	-	1.22416	0.111202	3.70967	1.89129	up	-	-	-	-	-	1.45671	0.0712205	7.31263	2.87039
Zmsp000618	290.14	147.05	289.131	C16H19NO4	[M+H]+	Dihydrolycorine*	Alkaloids	Isoquinoline alkaloids	6271-21-2	1	1.40307e+06	1.01017e+06	1.05471e+06	172258	109664	126289	151407	100438	128262	190907	156920	232444	8979.62	14098.3	17190.3	561393	394060	377418	-	-	-	-	-	-	-	-	-	-	-	-	1.3491	0.0141003	0.167324	-2.57929	down	-	-	-	-
Lhzp111002	290.14	147.04	289.131	C16H19NO4	[M+H]+	Pseudolycorine*	Alkaloids	Isoquinoline alkaloids	29429-03-6	1	1.32052e+06	1.05752e+06	1.16536e+06	172592	108012	147696	176799	114922	136233	214408	175064	233855	16498.6	16433.2	24448.8	622405	424443	429286	C12187	-	-	-	-	-	-	-	-	-	-	-	1.35587	0.00438776	0.175912	-2.50707	down	-	-	-	-
Lshp011017	332.19	215.11	331.178	C19H25NO4	[M+H]+	O-Methyllycorenine	Alkaloids	Pyrrole alkaloids	-	3	1.11466e+06	1.63838e+06	1.24864e+06	457846	175040	218055	734115	1.16449e+06	96705	314185	474566	221470	23340	40006.8	46477.6	494701	313015	464348	C12241	-	-	-	-	-	-	-	-	-	-	-	1.27169	0.0121046	0.252449	-1.98593	down	-	-	-	-
Lhzp110914	348.18	165.09	347.173	C19H25NO5	[M+H]+	7-Methoxy-O-methyllycorenine	Alkaloids	Pyrrole alkaloids	-	3	46003	13662.3	45230.6	131900	74155.9	113377	28806.6	51964.4	44406.2	20930.5	15831.8	21560.3	0	0	0	47042.3	30955.1	48296.3	-	-	1.53784	0.0735744	0.46592	-1.10185	down	1.41718	0.0349111	0.182582	-2.45339	down	-	-	-	-	-	1.35994	0.0476055	0.391874	-1.35154
MW0007811	147.04	91.06	124.052	C7H8O2	[M+Na]+	3-Methoxyphenol	Phenolic acids	Phenolic acids	150-19-6	3	1.61368e+06	1.7145e+06	1.65424e+06	1.00993e+06	857124	526576	1.16095e+06	1.27999e+06	1.2135e+06	1.66107e+06	1.47347e+06	1.85758e+06	828064	931172	463350	948324	1.32754e+06	876147	-	-	-	-	-	-	-	1.27444	0.0100489	2.08558	1.06045	up	-	-	-	-	-	-	-	-	-
Lshp011102	454.13	292.08	453.127	C20H23NO11	[M+H]+	7-Deoxynarciclasine glucoside	Alkaloids	Piperidine alkaloids	-	2	724731	334791	668309	315869	235721	481269	305367	334423	273378	197471	122208	337900	398831	507865	216495	367074	344936	231524	-	-	-	-	-	-	-	-	-	-	-	-	1.10327	0.0800726	0.380581	-1.39373	down	-	-	-	-
Lchn000012	537.2	327.12	538.205	C26H34O12	[M-H]-	Alangilignoside D	Others	Others	-	1	11175.9	5762.88	5315.69	8354.51	7194.76	21950.4	5005	5624.21	655.976	8302.28	5672.48	6325.81	12751.1	10290	9302.3	10330.1	7642.38	12292.9	-	-	-	-	-	-	-	-	-	-	-	-	-	-	-	-	-	1.01422	0.199157	0.300941	-1.73245
Lmhp004270	209.08	79.05	208.074	C11H12O4	[M+H]+	Nigerapyrone E	Others	Ketone compounds	-	2	85149.9	34201.2	62939.5	33819.4	17166.6	40010	11670	34805	21633.9	9216.61	40349.4	20005	56610.4	37507	21062.6	35458.9	22943.2	35543.8	-	-	-	-	-	-	-	-	-	-	-	-	1.00129	0.109767	0.381649	-1.38968	down	-	-	-	-
Lssp210087	359.15	137.06	358.142	C20H22O6	[M+H]+	Matairesinol	Lignans and Coumarins	Lignans	580-72-3	2	20005	83640.8	20284.4	46743.1	30918	257973	126453	28340	5976.32	12551.1	17326.8	22611.3	74601.5	49801.4	25737.9	33018.5	39309.6	51846.1	C10682	ko00999,ko01100,ko01110	-	-	-	-	-	1.07207	0.326161	0.156388	-2.6768	down	-	-	-	-	-	-	-	-	-
Zmwp001893	306.13	288.12	305.126	C16H19NO5	[M+H]+	Crinamabine	Alkaloids	Isoquinoline alkaloids	-	2	3.20432e+06	2.05358e+06	1.62932e+07	2.04044e+06	1.35713e+06	1.79425e+06	971172	1.26164e+06	886002	414248	338440	660625	628953	612254	635009	2.05315e+06	1.70389e+06	1.27449e+06	-	-	1.55508	0.0199617	0.453157	-1.14192	down	1.37589	0.0119447	0.272219	-1.87716	down	1.19041	0.279358	0.0655797	-3.93061	down	-	-	-	-
Qmrp120309	399.19	269.13	398.184	C22H26N2O5	[M+H]+	Flavisiamine C	Alkaloids	Plumerane	-	2	95478.7	70679.7	108707	10005	34539	33488.6	813283	2.71846e+06	499967	23340	410764	134771	16148	10369	6670	198146	317837	254855	-	-	1.35269	0.235684	0.1411	-2.82521	down	-	-	-	-	-	-	-	-	-	-	1.46819	0.19763	51.667	5.69117
Lssp210280	423.09	261.04	422.085	C19H18O11	[M+H]+	1,5-dihydroxy ketone-6 murine O-β-D-glucoside	Others	Others	-	2	108380	84562.8	71690	26193.9	18335.9	30777.8	22908.2	94040.4	9823.93	14407.9	55015	27274.1	7200.28	31382.9	16354.9	30304.1	26675	41380.1	-	-	-	-	-	-	-	-	-	-	-	-	1.11245	0.0258815	0.365401	-1.45245	down	-	-	-	-
Yalp002838	207.07	91.05	206.058	C11H10O4	[M+H]+	4-Methoxy-5-(hydroxymethyl)-2H-1-benzopyran-2-one*	Lignans and Coumarins	Coumarins	-	2	0	0	0	30010	67668	31675	58350	54495.3	171648	203436	99262.8	244696	67681.3	54893.7	68084.7	108943	70116	78579.2	-	-	-	-	-	-	-	1.28335	0.0747781	4.23179	2.08127	up	1.35424	0.0519029	#DIV/0!	#DIV/0!	up	-	-	-	-
Cmsp002303	316.15	284.14	315.147	C18H21NO4	[M+H]+	Epicephalotaxine	Alkaloids	Isoquinoline alkaloids	39707-72-7	2	33578.7	18877.4	57803.7	1.01605e+06	222418	381740	1.00877e+06	379435	2.3031e+06	1.14929e+06	157670	1.60746e+06	45153.5	5794.23	5418.71	389108	562558	367581	-	-	-	-	-	-	-	-	-	-	-	-	1.19246	0.160447	26.4323	4.72423	up	-	-	-	-
HJN055	435.13	273.08	436.137	C21H24O10	[M-H]-	Dihydrocharcone-4'-O-glucoside	Flavonoids	Chalcones	-	3	33171.7	16947	31428.8	16888	19505.3	21671.7	12991.7	19852.3	20043.7	9372.06	3797.48	3582.42	0	0	0	15920.8	19152.9	11592.8	-	-	1.51105	0.0171131	0.316746	-1.6586	down	1.3114	0.00553075	0.288503	-1.79334	down	1.23711	0.0394046	0.205426	-2.28331	down	-	-	-	-
Wbkp004013	377.16	359.15	376.152	C20H24O7	[M+H]+	shinjudilactone	Terpenoids	Ditepenoids	80180-30-9	2	155085	184938	159745	46680	34311.6	48262.3	20645.2	106710	48792.9	46680	155090	22939.6	58757.7	33835.8	38610.9	61934.4	77837.5	101361	-	-	-	-	-	-	-	-	-	-	-	-	-	-	-	-	-	-	-	-	-
mws0921	149.06	131.05	150.068	C9H10O2	[M-H]-	p-Coumaryl alcohol	Phenolic acids	Phenolic acids	3690-05-9	3	18595.4	18977.7	22456.1	6591.38	14414.4	8277.07	21696.9	31039.8	27270.8	29515	12882.4	23481.5	7729.53	14916.2	8365.07	29066.7	17574.7	23209.6	C02646	ko00940,ko01100,ko01110	-	-	-	-	-	1.11158	0.112412	2.24975	1.16976	up	-	-	-	-	-	1.38779	0.00979887	2.73223	1.45008
Labn004625	415.16	89.02	416.168	C19H28O10	[M-H]-	2-Phenylethyl beta-primeveroside	Phenolic acids	Phenolic acids	129932-48-5	2	30728.5	29358.8	38786.1	99678.6	94944.7	67841.9	68880.9	89582.3	42787	25541.5	33272.6	20647.7	19631.2	12160.5	6214.6	44452.7	51846.4	31066	-	-	1.52917	0.0865757	0.394841	-1.34066	down	1.37706	0.0161311	0.302752	-1.72379	down	-	-	-	-	-	-	-	-	-
Lhzp110923	376.18	284.13	375.168	C20H25NO6	[M+H]+	3-O-Acetyl-narcissidine	Alkaloids	Pyrrole alkaloids	-	3	40010	20994.3	48614.4	12357.7	48608.1	12351	36675	27890.9	30010	85822.2	43345	103734	12351	18340	43345	33236.2	51320.5	35010	-	-	1.46659	0.120547	2.46259	1.30017	up	1.13895	0.078368	3.17665	1.6675	up	-	-	-	-	-	-	-	-	-
Lmbp002592	611.16	287.05	610.153	C27H30O16	[M+H]+	Kaempferol-3,7-O-diglucoside	Flavonoids	Flavonols	25615-14-9	3	29374.6	21254.3	28340	53350	18902.9	29943.6	12393.2	10859.9	13037.9	5452.73	5217.9	36675	16272.6	16675	16253.4	25120.5	14971.8	21219.6	-	-	-	-	-	-	-	-	-	-	-	-	-	-	-	-	-	1.30197	0.162477	0.35511	-1.49366
MWSslk066	169.05	65.04	168.042	C8H8O4	[M+H]+	3-Hydroxy-4-methoxybenzoic acid; Isovanillic Acid	Phenolic acids	Phenolic acids	645-08-9	3	26824.5	39246.8	39573.9	28399.6	29128.6	38547.3	10527.9	38877.6	15415.7	21596.1	24866.1	19665.9	59346.9	71161.1	78777.5	36675	40404.9	24196.8	-	-	-	-	-	-	-	-	-	-	-	-	-	-	-	-	-	-	-	-	-
Lchp000218	209.08	121.06	208.074	C11H12O4	[M+H]+	(R)-3-ethyl-7-hydroxy-6-methoxyphthalide	Others	Others	-	2	293609	186820	306094	128334	92764.5	117380	28855.9	205657	41680	71690	220175	54411	162022	184060	142467	164114	118670	100729	-	-	-	-	-	-	-	-	-	-	-	-	-	-	-	-	-	-	-	-	-
Zmhn001446	579.21	417.16	580.216	C28H36O13	[M-H]-	Syringaresinol-4'-O-glucoside*	Lignans and Coumarins	Lignans	7374-79-0	3	3844.06	6730.46	5005	4080.18	4316.49	4986.49	9547.82	11624.3	69722.8	11737.7	9461.1	9669.5	14212.9	18321.8	7593	9537	8639.66	13738.6	C10890	-	-	-	-	-	-	1.4105	0.00839702	2.3065	1.20571	up	-	-	-	-	-	1.15919	0.320401	6.79174	2.76378
Hahn002315	579.21	417.16	580.216	C28H36O13	[M-H]-	syringaresinol-4-O-β-D-glucopyranoside*	Others	Others	-	3	3844.06	6730.46	5005	4080.18	4316.49	4986.49	9547.82	11624.3	69722.8	11737.7	9461.1	9669.5	14212.9	18321.8	7593	9537	8639.66	13738.6	-	-	-	-	-	-	-	1.4105	0.00839702	2.3065	1.20571	up	-	-	-	-	-	1.15919	0.320401	6.79174	2.76378
pmp000579	463.12	301.07	462.116	C22H22O11	[M+H]+	Diosmetin-7-O-galactoside*	Flavonoids	Flavones	-	3	33994.2	56414.3	27195.8	20234.6	8112.34	16555.2	69269	18998.8	9239.35	19286.4	10005	8987.28	15398.3	20681.1	21675	23816	15005	25493	-	-	-	-	-	-	-	-	-	-	-	-	1.17227	0.08156	0.325487	-1.61933	down	-	-	-	-
Lmzp002365	465.14	303.09	464.132	C22H24O11	[M+H]+	Hesperetin-7-O-glucoside	Flavonoids	Flavanones	31712-49-9	3	376482	181078	283788	50978.8	70253.3	120403	132642	144941	103257	39920.8	60020	125212	123747	43834.1	91418.8	188128	117349	128323	C16422	ko00941	-	-	-	-	-	-	-	-	-	-	1.20257	0.0501828	0.26761	-1.9018	down	-	-	-	-
Zblp002750	181.09	121.06	180.079	C10H12O3	[M+H]+	Methyl-3-(3-hydroxyphenyl)Propionate	Phenolic acids	Phenolic acids	61389-68-2	3	376793	152785	381658	104180	33665.5	74928.4	41110.8	89885	70117.3	39764.3	18767.3	107117	67167.6	115298	53213.2	187178	118550	122440	-	-	-	-	-	-	-	-	-	-	-	-	1.17211	0.0679165	0.181785	-2.4597	down	-	-	-	-
MWSprf034	447.15	153.06	446.142	C19H26O12	[M+H]+	Gaultherin	Phenolic acids	Phenolic acids	490-67-5	1	126628	73638.9	250225	190582	178349	177358	177085	28499.9	72993.9	19517.8	5169.85	16130.2	54485.3	109259	130065	79449.9	90019.5	131735	-	-	1.41073	0.212706	0.146522	-2.77081	down	1.39196	1.00418e-05	0.0747184	-3.74239	down	1.24712	0.119786	0.0906073	-3.46423	down	-	-	-	-
Wagp000980	376.16	121.06	375.153	C16H25NO9	[M+H]+	2-[(4-hydroxyphenethyl)amino]ethane-1,1,2-triol O-Glucoside	Alkaloids	Alkaloids	-	2	36805.8	81253.8	73782.2	65771.1	82261.9	109579	222982	18889.5	8944.55	78586.9	25929.9	53081.8	269422	189024	238813	39006.6	67325.8	67574.8	-	-	-	-	-	-	-	-	-	-	-	-	-	-	-	-	-	-	-	-	-
pmn001378	519.19	357.14	520.194	C26H32O11	[M-H]-	Pinoresinol-4-O-glucoside*	Lignans and Coumarins	Lignans	41607-20-9	1	6233.48	2933.23	6720.92	51960.1	21561.5	46463	30655	5238.14	2202.2	14930.2	11258.3	20509	25808.6	34468	13079.3	17618.6	16857.6	9964.71	C17529	-	-	-	-	-	-	1.19519	0.11115	0.389196	-1.36143	down	1.16624	0.0453569	2.93924	1.55544	up	1.08912	0.103661	0.317502	-1.65516
pmb0382	339.09	177.05	338.079	C19H14O6	[M+H]+	O-Feruloyl 4-hydroxycoumarin	Lignans and Coumarins	Coumarins	-	3	25660.4	51585.2	23391	18595.4	30755.5	47900.6	51080.7	71997.5	12831.2	10005	31705.4	10005	21169.8	19235.8	14110.8	11657.8	16819.8	21070.9	-	-	1.01094	0.242265	0.380514	-1.39398	down	-	-	-	-	-	-	-	-	-	-	-	-	-	-
Qmyp101114	371.21	209.15	370.199	C19H30O7	[M+H]+	9-O-β-D-Glucoside of 3-hydroxy-7,8-didehydro-β-ionol*	Terpenoids	Sesquiterpenoids	-	2	46359.8	6670	22555.8	13656	11670	17038.8	16675	38949.1	22050.5	13037.5	21837.8	26295.9	66627.4	44441.8	45789.1	46279.9	37518.1	25333	-	-	-	-	-	-	-	-	-	-	-	-	-	-	-	-	-	-	-	-	-
Lmmp003349	371.21	209.15	370.199	C19H30O7	[M+H]+	Byzantionoside A*	Others	Ketone compounds	189109-41-9	2	46359.8	6670	22555.8	13656	11670	17038.8	16675	38949.1	22050.5	13037.5	21837.8	26295.9	66627.4	44441.8	45789.1	46279.9	37518.1	25333	-	-	-	-	-	-	-	-	-	-	-	-	-	-	-	-	-	-	-	-	-
pmn001419	325.09	163.04	326.1	C15H18O8	[M-H]-	1-O-p-Coumaroyl-β-D-glucose*	Phenolic acids	Phenolic acids	7139-64-2	1	119797	74582.6	197222	16083.4	28371.1	23518.5	95512.1	25915.4	43448	47198.9	35578.6	94077.2	22138	29428.7	20194.3	86882.4	47297.1	71969.1	C16827	-	-	-	-	-	-	1.15991	0.17531	2.60184	1.37953	up	-	-	-	-	-	1.04126	0.260436	2.4256	1.27834
Zmhn002301	325.09	163.04	326.1	C15H18O8	[M-H]-	p-Coumaric acid-4-O-glucoside*	Phenolic acids	Phenolic acids	117405-48-8	1	119797	74582.6	197222	16083.4	28371.1	23518.5	95512.1	25915.4	43448	47198.9	35578.6	94077.2	22138	29428.7	20194.3	86882.4	47297.1	71969.1	C06739	-	-	-	-	-	-	1.15991	0.17531	2.60184	1.37953	up	-	-	-	-	-	1.04126	0.260436	2.4256	1.27834
MWSmce089	284.12	147.04	283.121	C17H17NO3	[M+H]+	p-Coumaroyltyramine*	Alkaloids	Phenolamine	36417-86-4	2	28009.8	49782.4	47915.6	3186	2019.45	54675.1	6179.85	5901.39	2235	4473.52	2839.98	13657.6	5136.19	6028.03	2491.79	20282.5	11312.1	14745.1	-	-	-	-	-	-	-	-	-	-	-	-	1.22161	0.0220977	0.166825	-2.5836	down	-	-	-	-
Lmbp003825	325.09	163.04	324.084	C15H16O8	[M+H]+	Skimmin (7-Hydroxycoumarin-7-O-glucoside)	Lignans and Coumarins	Coumarins	93-39-0	3	55226.6	68215.7	56175.6	11672.2	22384	61718.6	35010	40886.4	27803.2	34365.8	15492.2	15023.4	50460.4	41680	19183.9	13558.3	25005	22418.8	-	-	-	-	-	-	-	-	-	-	-	-	1.20234	0.0107852	0.361219	-1.46905	down	-	-	-	-
zjgp122321	355.1	163.05	354.095	C16H18O9	[M+H]+	4-O-acetyl-3-O-caffeoyl-2-C-methyl-D-erythronate	Others	Others	-	3	34691.4	9694.92	2682.91	127496	176724	87700.8	17434	11096.3	25379.3	67581.4	73788.3	35512.4	74166.4	21703.6	30123.2	12946.3	21912.3	14263.1	-	-	1.55139	0.0615533	3.28108	1.71417	up	1.13427	0.0911225	0.451322	-1.14777	down	1.01265	0.0498495	3.75791	1.90993	up	1.47832	0.0453278	0.137553	-2.86194
Wcjp002598	146.06	91.05	145.053	C9H7NO	[M+H]+	8-hydroxyquinoline*	Alkaloids	Quinoline alkaloids	148-24-3	1	603219	571604	547365	80011.5	139285	142709	248875	311089	332097	166425	334266	144959	119361	93161.6	110501	388294	217037	273606	C19434	-	-	-	-	-	-	-	-	-	-	-	1.21221	0.0207067	0.374901	-1.41542	down	1.41016	0.00605071	2.46422	1.30113
Qmkp093004	146.06	91.05	145.053	C9H7NO	[M+H]+	Indole-3-carboxaldehyde*	Alkaloids	Plumerane	487-89-8	1	603219	571604	547365	80011.5	139285	142709	248875	311089	332097	166425	334266	144959	119361	93161.6	110501	388294	217037	273606	C08493	-	-	-	-	-	-	-	-	-	-	-	1.21221	0.0207067	0.374901	-1.41542	down	1.41016	0.00605071	2.46422	1.30113
Labp003718	700.28	311.13	699.274	C32H45NO16	[M+H]+	Glucosyl-6,7-di-O-methyl-N-deacetylisoipecosidic acid	Alkaloids	Isoquinoline alkaloids	-	2	30010	39622.3	6670	56137.1	61685	130743	197435	8772.14	8573.43	6520.4	11909.1	15005	81181.9	52878.5	25685.1	44872.6	37593.2	23340	-	-	-	-	-	-	-	1.35968	0.0945798	0.13451	-2.89421	down	-	-	-	-	-	-	-	-	-
Hmhp004269	409.15	229.09	408.142	C20H24O9	[M+H]+	Nodakenin*	Lignans and Coumarins	Coumarins	495-31-8	2	123474	191800	112511	125292	98245.2	70731.5	101455	99602.5	115426	123434	103202	146001	61733.1	85823.1	32576.3	98967.5	122821	180120	C09279	-	-	-	-	-	-	-	-	-	-	-	-	-	-	-	-	-	-	-	-
pmn001421	337.09	191.06	338.1	C16H18O8	[M-H]-	3-O-p-Coumaroylquinic acid*	Phenolic acids	Phenolic acids	87099-71-6	2	10478.4	11342	5663.19	6982.05	13752.4	9517.51	6418.41	2832.32	5557.21	19181.1	21637.3	22185.4	8599.56	10787.8	7838.81	9855.24	5935.34	5947.09	-	-	1.65983	0.000398265	4.25473	2.08907	up	1.29657	0.0175231	2.08264	1.05841	up	1.20645	0.00938725	2.29242	1.19687	up	1.17071	0.103444	0.489487	-1.03066
Wcfn003424	337.09	191.06	338.1	C16H18O8	[M-H]-	Coumaroyl Quinic Acid*	Others	Others	-	2	10478.4	11342	5663.19	6982.05	13752.4	9517.51	6418.41	2832.32	5557.21	19181.1	21637.3	22185.4	8599.56	10787.8	7838.81	9855.24	5935.34	5947.09	-	-	1.65983	0.000398265	4.25473	2.08907	up	1.29657	0.0175231	2.08264	1.05841	up	1.20645	0.00938725	2.29242	1.19687	up	1.17071	0.103444	0.489487	-1.03066
Wcop004851	177.05	117.03	176.047	C10H8O3	[M+H]+	5,6-dimethyl-2-benzofuran-1,3-dione	Terpenoids	Sesquiterpenoids	5999-20-2	3	1.62896e+06	1.35178e+06	1.61382e+06	396500	332488	406353	938545	996977	416165	1.0743e+06	643706	1.77291e+06	2.08284e+06	2.27061e+06	1.52249e+06	634482	1.18268e+06	834614	-	-	-	-	-	-	-	1.24255	0.139033	3.07477	1.62048	up	-	-	-	-	-	1.17628	0.15731	2.07135	1.05057
Lsjp211260	227.16	125.09	226.157	C13H22O3	[M+H]+	9-epi-Blumenol B	Terpenoids	Monoterpenoids	-	3	118575	65516.1	60340.6	55931.3	18307.1	54904.6	24861.6	64786.3	21993.9	26048.4	54244.7	11009.3	87474.4	63817.6	55770.2	47213.1	35010	65916.9	-	-	-	-	-	-	-	-	-	-	-	-	1.00664	0.0949523	0.37353	-1.42071	down	-	-	-	-
HX1361	177.05	89.04	176.047	C10H8O3	[M+H]+	7-Methoxycoumarin	Lignans and Coumarins	Coumarins	531-59-9	3	1.03969e+06	888693	847962	111083	67116	139306	387338	478078	248024	516431	281308	765069	809420	876025	518338	410467	611750	333385	C09268	-	-	-	-	-	-	1.2975	0.0938666	4.92215	2.29929	up	-	-	-	-	-	1.41001	0.0475434	3.50684	1.81017
Hmdp001676	300.11	282.11	299.116	C17H17NO4	[M+H]+	N-p-Coumaroyloctopamine	Alkaloids	Phenolamine	66648-45-1	2	0	0	0	416591	551383	447596	375789	108901	1.64008e+06	318555	145080	264874	428670	372669	295978	250319	489251	390072	-	-	-	-	-	-	-	-	-	-	-	-	1.35702	0.0418096	#DIV/0!	#DIV/0!	up	-	-	-	-
pmn001583	609.15	300.03	610.153	C27H30O16	[M-H]-	Quercetin-3-O-robinobioside	Flavonoids	Flavonols	52525-35-6	3	2777.91	793.434	1977.77	7125.1	1598.02	1587.46	1587.91	3561.56	5036.72	15837.8	2329.84	11471	34442.1	27303.6	18613.1	9239.37	5933.56	5148.02	-	-	-	-	-	-	-	-	-	-	-	-	-	-	-	-	-	-	-	-	-
ZINC586482	149.06	106.04	150.068	C9H10O2	[M-H]-	4-Allylbenzene-1,2-diol	Phenolic acids	Phenolic acids	1126-61-0	3	75359.7	68134.7	96011.1	23699.3	13986.2	21632.3	79834.5	89632.5	71888.2	77049.1	45072.6	66050.3	27962.8	26151.4	13844.3	28730.7	46110.8	57894.7	-	-	-	-	-	-	-	1.33212	0.0348246	3.17227	1.66552	up	-	-	-	-	-	1.49754	0.00150215	4.06885	2.02462
MWSmce229	183.06	165.05	182.058	C9H10O4	[M+H]+	3,4-Dimethoxybenzoic acid; Veratric acid	Phenolic acids	Phenolic acids	93-07-2	2	261378	68250	86812.3	0	0	0	8852.83	5650.82	5644.43	11310.2	6350.81	14047.6	6415.07	6353.85	18340	25741.7	32825.1	48950.3	-	-	-	-	-	-	-	1.43132	0.0425409	#DIV/0!	#DIV/0!	up	1.28342	0.172281	0.0761421	-3.71516	down	1.532	0.0243854	#DIV/0!	#DIV/0!
Sayp008963	235.17	133.1	234.162	C15H22O2	[M+H]+	phomophyllin H*	Terpenoids	Sesquiterpenoids	-	2	32115.5	32396.3	24248.8	30434.8	5677.55	32256.3	33371.3	40267	36716.2	18014.4	14845.1	24556	25752.8	10890	7462.51	35993	20471.2	21491.1	-	-	-	-	-	-	-	-	-	-	-	-	-	-	-	-	-	-	-	-	-
Wccp004073	330.13	239.07	329.126	C18H19NO5	[M+H]+	yemenine A	Alkaloids	Alkaloids	-	2	1.03674e+07	1.65196e+07	1.04793e+07	354526	253349	177545	243505	154081	70226.5	347356	308408	351832	96257.2	66368.7	111543	1669735	2.692e+06	1.46196e+06	-	-	1.34658	0.0604021	2.15385	1.10692	up	-	-	-	-	-	1.3543	0.0269825	0.0269653	-5.21275	down	-	-	-	-
Lazn003564	597.22	375.14	598.226	C28H38O14	[M-H]-	Picraquassioside C	Lignans and Coumarins	Lignans	-	2	40214.3	121052	15518.8	27216.5	24921.1	215644	86167.1	9771.18	6402.55	17357.5	13547.6	11120	132310	51565.4	26758.3	44677.8	91944.3	73162.5	-	-	-	-	-	-	-	1.00093	0.355889	0.156938	-2.67173	down	-	-	-	-	-	-	-	-	-
Lhdp120312	373.22	135.12	372.215	C19H32O7	[M+H]+	3-Hydroxy-7,8-dehydro-ionol-9-O-β-D-glucopyranoside*	Terpenoids	Monoterpenoids	-	3	61249.2	35461.5	58681.7	13326.8	10723.3	18098.6	110380	368636	77764	18340	34912.3	5005	46260.6	76140.4	17958.5	50530.6	34058.8	71656.4	-	-	1.46714	0.21177	0.104633	-3.25659	down	-	-	-	-	-	-	-	-	-	-	1.43234	0.203199	13.2099	3.72355
Lxmp122302	373.22	135.12	372.215	C19H32O7	[M+H]+	Dehydroxyampelopsisionoside*	Terpenoids	Sesquiterpenoids	-	3	61249.2	35461.5	58681.7	13326.8	10723.3	18098.6	110380	368636	77764	18340	34912.3	5005	46260.6	76140.4	17958.5	50530.6	34058.8	71656.4	-	-	1.46714	0.21177	0.104633	-3.25659	down	-	-	-	-	-	-	-	-	-	-	1.43234	0.203199	13.2099	3.72355
Lmsp003939	625.18	317.07	624.169	C28H32O16	[M+H]+	Isorhamnetin-3-O-galactoide-7-O-rhamnoside*	Flavonoids	Flavonols	-	3	9578.48	5113.18	10300.4	10474.2	6328.39	8340	12770.8	23340	3851.85	80863.6	10907.2	26931.6	3340	11670	6413.38	21812.4	32076.9	15465.8	-	-	-	-	-	-	-	1.02887	0.278248	4.72116	2.23914	up	-	-	-	-	-	-	-	-	-
Lmsp004045	625.18	317.07	624.169	C28H32O16	[M+H]+	Isorhamnetin-3-O-glucoside-7-O-rhamnoside*	Flavonoids	Flavonols	17331-71-4	3	9578.48	5113.18	10300.4	10474.2	6328.39	8340	12770.8	23340	3851.85	80863.6	10907.2	26931.6	3340	11670	6413.38	21812.4	32076.9	15465.8	-	-	-	-	-	-	-	1.02887	0.278248	4.72116	2.23914	up	-	-	-	-	-	-	-	-	-
Lssp210086	373.13	137.06	372.121	C20H20O7	[M+H]+	Balanophonin B	Lignans and Coumarins	Lignans	92216-41-6	2	420994	355053	444171	46356.6	49642.8	56734.8	102654	155877	30010	88478.2	66093.3	64432.6	62270.2	31141.3	73355	186848	86313.7	177621	-	-	-	-	-	-	-	-	-	-	-	-	1.34729	0.00376543	0.179479	-2.47811	down	-	-	-	-
Latp003004	395.13	233.08	394.126	C19H22O9	[M+H]+	2-Methyl-5-acetonyl-7-hydroxychromone glucoside	Others	Chromone	-	3	17470	39227.4	14746.4	105045	23282.9	18885.9	27821.8	45263	58792.5	108287	96618	63095.4	44462.7	42399.6	82065.7	88365	55574	43345	-	-	1.43155	0.0577558	2.03219	1.02304	up	-	-	-	-	-	1.23487	0.0219279	3.7512	1.90735	up	-	-	-	-
pma6640	479.12	317.07	478.111	C22H22O12	[M+H]+	3'-O-Methyltricetin-7-O-glucoside	Flavonoids	Flavones	-	3	144627	43110.3	14227.5	111902	127137	251221	0	0	0	59103.6	25077.6	75843.5	114250	98218.4	56741.9	32809.8	69504.6	72464.5	-	-	1.74295	0.0702375	#DIV/0!	#DIV/0!	up	1.18551	0.118421	0.326409	-1.61525	down	-	-	-	-	-	1.53255	0.0657796	0	#DIV/0!
Lcsn000193	597.22	327.12	598.226	C28H38O14	[M-H]-	isatioxyneolignoside E	Lignans and Coumarins	Lignans	-	1	130827	399236	32294.8	103681	27463.8	404357	218385	40105.9	6411.44	26136.1	34545.7	29015	316624	91243.9	106680	125186	143917	63291.8	-	-	-	-	-	-	-	-	-	-	-	-	-	-	-	-	-	-	-	-	-
Zbjp004549	359.13	179.07	358.126	C16H22O9	[M+H]+	6-hydroxy-3-methoxy-5-vinyl-4,4a,5,6-tetrahydro-1H,3H-pyrano[3,4-c]pyran-1-one-O-xylose	Terpenoids	Monoterpenoids	-	3	502570	1.78419e+06	114294	4594630	8.12155e+06	1.42474e+07	3371110	2.16742e+06	37365.8	2987690	911245	2115605	2168050	933050	190130	3.06953e+06	5013415	2.30965e+06	-	-	-	-	-	-	-	1.2293	0.125988	0.223062	-2.16448	down	-	-	-	-	-	-	-	-	-
HJAP018	523.1	319.05	522.101	C23H22O14	[M+H]+	Myricetin-3-O-(6''-acetyl)glucoside	Flavonoids	Flavonols	-	3	10862.7	25733.2	28648.6	2818.82	5016.51	10528.7	5005	11026.1	3965.13	8340	13157.2	9400.74	3340	19115.4	23137	25015.2	10962	16675	-	-	-	-	-	-	-	-	-	-	-	-	-	-	-	-	-	-	-	-	-
Lmmp002963	625.18	317.06	624.169	C28H32O16	[M+H]+	6-C-Methylquercetin-3-O-rutinoside	Flavonoids	Flavonols	-	3	10907.2	26675	16605.4	9189.33	11670	4494.46	5797.72	18340	3239.53	61607.1	10268.4	86592.7	1938.8	6670	5005	10926.5	24364.4	15465.8	-	-	1.25078	0.18699	5.78832	2.53314	up	1.05977	0.185953	6.25027	2.64392	up	-	-	-	-	-	-	-	-	-
MWSHY0094	459.09	139.04	458.085	C22H18O11	[M+H]+	Gallocatechin gallate	Flavonoids	Flavanols	4233-96-9	3	15070.4	16932.6	21016.5	28711.4	8340	28340	3290.96	28340	17762.9	1939.87	5005	9857.88	3185.58	8175.24	15320.3	7869.9	6569.44	14042	-	-	-	-	-	-	-	1.09805	0.126365	0.256957	-1.9604	down	1.11774	0.0162055	0.316917	-1.65783	down	-	-	-	-
Smnp001863	449.14	287.09	448.137	C22H24O10	[M+H]+	8-O-methyl-7-hydroxyaloin	Quinones	Anthraquinone	-	2	60790.1	38345	56926.2	175908	160095	110062	218505	41420.9	35387	181522	56561.6	392210	63634.2	63621.3	32138.1	241875	114428	133229	-	-	-	-	-	-	-	-	-	-	-	-	-	-	-	-	-	-	-	-	-
Lmtn002324	431.15	269.1	432.163	C19H28O11	[M-H]-	Benzyl-(2''-O-glucosyl)glucoside*	Phenolic acids	Phenolic acids	-	3	15828	49590.3	85496.6	105122	107097	114113	123383	93874.6	110556	117187	37428.2	30245.5	65264.8	58400.4	114600	50288	107577	128891	C17564	-	-	-	-	-	-	-	-	-	-	-	-	-	-	-	-	-	-	-	-
MWSslk237	463.13	301.09	462.116	C22H22O11	[M+H]+	Hispidulin-7-O-glucoside(Homoplantaginin)*	Flavonoids	Flavones	17680-84-1	3	0	0	0	7849.67	8360.47	18704.5	37048	28340	15411	24671.4	14766.9	8836.42	20075.1	15610	12789.2	19880	10020.3	10005	C17762	-	-	-	-	-	-	-	-	-	-	-	1.34943	0.0734316	#DIV/0!	#DIV/0!	up	1.17012	0.119758	2.31418	1.2105
Lagp004602	505.26	211.17	504.257	C24H40O11	[M+H]+	Foliasalacioside B1*	Terpenoids	Monoterpenoids	-	3	9562.11	18011.5	4379.83	8860.43	18526.3	5996.98	9582.1	26675	23761.3	1670	7191.89	7088.83	11670	14715.4	8720.66	8958.58	6670	15536.6	-	-	1.38177	0.0958988	0.265764	-1.91178	down	-	-	-	-	-	-	-	-	-	-	-	-	-	-
Lhdp120305	505.26	211.17	504.257	C24H40O11	[M+H]+	Guettardionoside*	Terpenoids	Monoterpenoids	-	3	9562.11	18011.5	4379.83	8860.43	18526.3	5996.98	9582.1	26675	23761.3	1670	7191.89	7088.83	11670	14715.4	8720.66	8958.58	6670	15536.6	-	-	1.38177	0.0958988	0.265764	-1.91178	down	-	-	-	-	-	-	-	-	-	-	-	-	-	-
Lhzp110920	286.14	268.1	285.137	C17H19NO3	[M+H]+	Narwedine	Alkaloids	Piperidine alkaloids	-	1	0	0	0	8.05228e+06	1.07637e+07	9.0427e+06	9.16654e+06	2.8284e+06	8.80554e+06	1.18724e+07	2.04465e+06	7.25318e+06	9.84931e+06	3.30143e+06	5.94789e+06	2.83225e+06	3.25024e+06	6.15532e+06	-	-	-	-	-	-	-	-	-	-	-	-	1.3526	0.130811	#DIV/0!	#DIV/0!	up	-	-	-	-
Wagp005869	459.22	211.17	458.215	C22H34O10	[M+H]+	3-Hydroxy-beta-ionol 3-(6''-Malonyl)Glucoside	Others	Others	-	1	113839	125095	124825	0	0	0	40312.3	263262	88286.5	212287	122559	231386	337811	400888	148004	104313	104817	214316	-	-	-	-	-	-	-	1.44294	0.0301711	#DIV/0!	#DIV/0!	up	-	-	-	-	-	1.51625	0.193674	#DIV/0!	#DIV/0!
pmb0713	655.19	331.08	654.18	C29H34O17	[M+H]+	Tricin-7-O-(2''-O-glucosyl)glucoside	Flavonoids	Flavones	-	3	21433.8	51680	23340	22301.9	20134.5	13340	13340	3340	5005	12852.5	1717.43	5005	5005	9183.92	2624.61	11670	25005	12530.7	-	-	-	-	-	-	-	1.08547	0.0495874	0.350954	-1.51065	down	1.10471	0.108041	0.202946	-2.30083	down	1.21126	0.0514759	0.388785	-1.36296
Wccp003625	266.08	208.07	265.074	C16H11NO3	[M+H]+	7H-Pyrrolo(3,2,1-de)phenanthridin-7-one,10-hydroxy-9-methoxy-	Alkaloids	Alkaloids	80787-57-1	2	45239.3	54020.4	51113.9	610527	1.09207e+06	521802	86970.6	198475	923269	219071	151750	180686	202331	270032	334536	255508	340902	122848	-	-	-	-	-	-	-	1.35204	0.0861114	0.247935	-2.01197	down	1.34168	0.0191488	3.66758	1.87483	up	-	-	-	-
pmb0645	627.19	465.2	626.185	C28H34O16	[M+H]+	Hesperetin-6-C-glucoside-7-O-glucoside	Flavonoids	Flavonols	-	3	85119.2	65020	20645.2	39388.8	20005	33340	21437.8	10005	13340	37541.3	38157.8	18340	14939.2	38345	40159.4	59698.7	76185.8	26675	-	-	1.32868	0.110809	2.09989	1.07032	up	-	-	-	-	-	-	-	-	-	-	1.19883	0.089105	0.482918	-1.05015
Lmsp004166	611.16	303.05	610.153	C27H30O16	[M+H]+	Quercetin-3-O-glucoside-7-O-rhamnoside*	Flavonoids	Flavonols	-	3	43271.3	13409.6	18340	27610.8	65020	55015	30922.5	22726.7	20286.2	25829.4	43345	10923.1	13532.3	13340	21326.8	20005	6670	16941	-	-	-	-	-	-	-	-	-	-	-	-	-	-	-	-	-	-	-	-	-
Lmjp002461	611.16	303.05	610.153	C27H30O16	[M+H]+	Quercetin-3-O-neohesperidoside*	Flavonoids	Flavonols	29662-79-1	3	43271.3	13409.6	18340	27610.8	65020	55015	30922.5	22726.7	20286.2	25829.4	43345	10923.1	13532.3	13340	21326.8	20005	6670	16941	-	-	-	-	-	-	-	-	-	-	-	-	-	-	-	-	-	-	-	-	-
pmb0711	611.16	303.05	610.153	C27H30O16	[M+H]+	Quercetin-7-O-rutinoside*	Flavonoids	Flavonols	147714-62-3	3	43271.3	13409.6	18340	27610.8	65020	55015	30922.5	22726.7	20286.2	25829.4	43345	10923.1	13532.3	13340	21326.8	20005	6670	16941	-	-	-	-	-	-	-	-	-	-	-	-	-	-	-	-	-	-	-	-	-
HJAP011	463.11	343.08	462.116	C22H22O11	[M+H]+	Chrysoeriol-8-C-glucoside (Scoparin)*	Flavonoids	Flavones	301-16-6	3	165304	85348	109179	37184.2	36072.6	41556.5	26380.7	33340	32571.7	46224.1	35125.2	29665.8	46071.7	56511.2	36108	53080.8	20590.4	62394.1	-	-	-	-	-	-	-	-	-	-	-	-	1.26873	0.0673748	0.30852	-1.69656	down	-	-	-	-
Wcop005243	311.13	251.11	310.12	C19H18O4	[M+H]+	2-(3-tert-butyl-2-hydroxyphenyl)-2-hydroxyindene-1,3-dione	Terpenoids	Sesquiterpenoids	71313-34-3	3	423681	770203	300320	103368	75403.6	918139	413474	66985.8	32976	77514.6	113385	82710.2	159450	74428.1	83365	136436	275581	118435	-	-	-	-	-	-	-	-	-	-	-	-	1.27237	0.100695	0.183114	-2.44919	down	-	-	-	-
Lmmp003517	225.15	95.08	224.141	C13H20O3	[M+H]+	Solatuberenol A*	Others	Others	-	2	45099.5	51004.9	13340	37474.1	43776.9	34607.7	36839.9	47634	43436.2	47850.3	55075.1	23432.1	0	0	0	61175.6	33207.6	24001.1	-	-	-	-	-	-	-	-	-	-	-	-	-	-	-	-	-	-	-	-	-
Lmqp003432	227.16	121.1	226.157	C13H22O3	[M+H]+	6,9-Dihydroxy-7-megastigmen-3-one	Terpenoids	Sesquiterpenoids	-	3	43485.5	33688.7	35639.9	18291.2	42089.3	14985.2	15005	22663.1	23459	18394.7	20279.2	14985.2	14399.2	22919.9	11670	28340	52798.3	20400.9	-	-	-	-	-	-	-	-	-	-	-	-	1.29762	0.00996384	0.475643	-1.07205	down	-	-	-	-
[truncated: 31 more columns]

## Sheet: Table S3
Table S3: DEM KEGG summary
Source.Name	Kegg_pathway	ko_ID	Cluster_freq	uency	Metabolome_frequency	P-value	Corrected_P-value
GX_vs_HN_KEGG_stat.xlsx	Flavonoid biosynthesis	ko00941	6 out of 14	0.428571	11 out of 90 12.2222222222222%	0.00144455	0.0173346
SC_vs_JX_KEGG_stat.xlsx	Phenylpropanoid biosynthesis	ko00940	7 out of 28	0.25	8 out of 90 8.88888888888889%	0.000987139	0.0276399
SC_vs_ZJ_KEGG_stat.xlsx	Tryptophan metabolism	ko00380	6 out of 31	0.193548	7 out of 90 7.77777777777778%	0.00616622	0.141823
GX_vs_JX_KEGG_stat.xlsx	Phenylpropanoid biosynthesis	ko00940	6 out of 27	0.222222	8 out of 90 8.88888888888889%	0.00820834	0.172375
JX_vs_ZJ_KEGG_stat.xlsx	Tryptophan metabolism	ko00380	6 out of 34	0.176471	7 out of 90 7.77777777777778%	0.0108005	0.302413
SC_vs_GX_KEGG_stat.xlsx	Flavonoid biosynthesis	ko00941	5 out of 16	0.3125	11 out of 90 12.2222222222222%	0.0228869	0.343304
HN_vs_JX_KEGG_stat.xlsx	Phenylpropanoid biosynthesis	ko00940	6 out of 31	0.193548	8 out of 90 8.88888888888889%	0.0183552	0.49559
SC_vs_JX_KEGG_stat.xlsx	Tyrosine metabolism	ko00350	5 out of 28	0.178571	7 out of 90 7.77777777777778%	0.0281594	0.788463
HN_vs_ZJ_KEGG_stat.xlsx	Isoquinoline alkaloid biosynthesis	ko00950	4 out of 21	0.190476	7 out of 90 7.77777777777778%	0.0488769	0.830907
HN_vs_ZJ_KEGG_stat.xlsx	Tyrosine metabolism	ko00350	4 out of 21	0.190476	7 out of 90 7.77777777777778%	0.0488769	0.830907
SC_vs_HN_KEGG_stat.xlsx	Flavonoid biosynthesis	ko00941	6 out of 25	0.24	11 out of 90 12.2222222222222%	0.0442255	0.928736
GX_vs_HN_KEGG_stat.xlsx	Stilbenoid, diarylheptanoid and gingerol biosynthesis	ko00945	1 out of 14	0.0714286	1 out of 90 1.11111111111111%	0.155556	1
GX_vs_HN_KEGG_stat.xlsx	Flavone and flavonol biosynthesis	ko00944	1 out of 14	0.0714286	2 out of 90 2.22222222222222%	0.28839	1
GX_vs_HN_KEGG_stat.xlsx	Isoquinoline alkaloid biosynthesis	ko00950	2 out of 14	0.142857	7 out of 90 7.77777777777778%	0.297739	1
GX_vs_HN_KEGG_stat.xlsx	Tyrosine metabolism	ko00350	2 out of 14	0.142857	7 out of 90 7.77777777777778%	0.297739	1
GX_vs_HN_KEGG_stat.xlsx	Biosynthesis of secondary metabolites	ko01110	8 out of 14	0.571429	44 out of 90 48.8888888888889%	0.351551	1
GX_vs_HN_KEGG_stat.xlsx	Phenylpropanoid biosynthesis	ko00940	2 out of 14	0.142857	8 out of 90 8.88888888888889%	0.361902	1
GX_vs_HN_KEGG_stat.xlsx	Biosynthesis of various alkaloids	ko00996	1 out of 14	0.0714286	3 out of 90 3.33333333333333%	0.4016	1
GX_vs_HN_KEGG_stat.xlsx	Biosynthesis of cofactors	ko01240	1 out of 14	0.0714286	5 out of 90 5.55555555555556%	0.579633	1
GX_vs_HN_KEGG_stat.xlsx	Arginine and proline metabolism	ko00330	1 out of 14	0.0714286	7 out of 90 7.77777777777778%	0.707391	1
GX_vs_HN_KEGG_stat.xlsx	Biosynthesis of various plant secondary metabolites	ko00999	1 out of 14	0.0714286	8 out of 90 8.88888888888889%	0.756747	1
GX_vs_HN_KEGG_stat.xlsx	Metabolic pathways	ko01100	8 out of 14	0.571429	58 out of 90 64.4444444444444%	0.8232	1
GX_vs_JX_KEGG_stat.xlsx	Phenylalanine metabolism	ko00360	3 out of 27	0.111111	5 out of 90 5.55555555555556%	0.156974	1
GX_vs_JX_KEGG_stat.xlsx	2-Oxocarboxylic acid metabolism	ko01210	1 out of 27	0.037037	1 out of 90 1.11111111111111%	0.3	1
GX_vs_JX_KEGG_stat.xlsx	Carotenoid biosynthesis	ko00906	1 out of 27	0.037037	1 out of 90 1.11111111111111%	0.3	1
GX_vs_JX_KEGG_stat.xlsx	Indole alkaloid biosynthesis	ko00901	1 out of 27	0.037037	1 out of 90 1.11111111111111%	0.3	1
GX_vs_JX_KEGG_stat.xlsx	Lysine biosynthesis	ko00300	1 out of 27	0.037037	1 out of 90 1.11111111111111%	0.3	1
GX_vs_JX_KEGG_stat.xlsx	Penicillin and cephalosporin biosynthesis	ko00311	1 out of 27	0.037037	1 out of 90 1.11111111111111%	0.3	1
GX_vs_JX_KEGG_stat.xlsx	Isoquinoline alkaloid biosynthesis	ko00950	3 out of 27	0.111111	7 out of 90 7.77777777777778%	0.350197	1
GX_vs_JX_KEGG_stat.xlsx	Tyrosine metabolism	ko00350	3 out of 27	0.111111	7 out of 90 7.77777777777778%	0.350197	1
GX_vs_JX_KEGG_stat.xlsx	Biosynthesis of secondary metabolites	ko01110	14 out of 27	0.518519	44 out of 90 48.8888888888889%	0.444927	1
GX_vs_JX_KEGG_stat.xlsx	Biosynthesis of various plant secondary metabolites	ko00999	3 out of 27	0.111111	8 out of 90 8.88888888888889%	0.449658	1
GX_vs_JX_KEGG_stat.xlsx	Biosynthesis of amino acids	ko01230	1 out of 27	0.037037	2 out of 90 2.22222222222222%	0.51236	1
GX_vs_JX_KEGG_stat.xlsx	Lysine degradation	ko00310	1 out of 27	0.037037	2 out of 90 2.22222222222222%	0.51236	1
GX_vs_JX_KEGG_stat.xlsx	Biosynthesis of various alkaloids	ko00996	1 out of 27	0.037037	3 out of 90 3.33333333333333%	0.661977	1
GX_vs_JX_KEGG_stat.xlsx	Pantothenate and CoA biosynthesis	ko00770	1 out of 27	0.037037	3 out of 90 3.33333333333333%	0.661977	1
GX_vs_JX_KEGG_stat.xlsx	Arginine and proline metabolism	ko00330	2 out of 27	0.0740741	7 out of 90 7.77777777777778%	0.680407	1
GX_vs_JX_KEGG_stat.xlsx	Glycerophospholipid metabolism	ko00564	1 out of 27	0.037037	4 out of 90 4.44444444444444%	0.76688	1
GX_vs_JX_KEGG_stat.xlsx	Glycine, serine and threonine metabolism	ko00260	1 out of 27	0.037037	4 out of 90 4.44444444444444%	0.76688	1
GX_vs_JX_KEGG_stat.xlsx	Metabolic pathways	ko01100	16 out of 27	0.592593	58 out of 90 64.4444444444444%	0.819739	1
GX_vs_JX_KEGG_stat.xlsx	Flavonoid biosynthesis	ko00941	2 out of 27	0.0740741	11 out of 90 12.2222222222222%	0.902258	1
GX_vs_JX_KEGG_stat.xlsx	Tryptophan metabolism	ko00380	1 out of 27	0.037037	7 out of 90 7.77777777777778%	0.925948	1
GX_vs_ZJ_KEGG_stat.xlsx	Nicotinate and nicotinamide metabolism	ko00760	2 out of 23	0.0869565	2 out of 90 2.22222222222222%	0.063171	1
GX_vs_ZJ_KEGG_stat.xlsx	Flavonoid biosynthesis	ko00941	5 out of 23	0.217391	11 out of 90 12.2222222222222%	0.109272	1
GX_vs_ZJ_KEGG_stat.xlsx	Biosynthesis of various alkaloids	ko00996	2 out of 23	0.0869565	3 out of 90 3.33333333333333%	0.159363	1
GX_vs_ZJ_KEGG_stat.xlsx	Isoquinoline alkaloid biosynthesis	ko00950	3 out of 23	0.130435	7 out of 90 7.77777777777778%	0.249357	1
GX_vs_ZJ_KEGG_stat.xlsx	Tryptophan metabolism	ko00380	3 out of 23	0.130435	7 out of 90 7.77777777777778%	0.249357	1
GX_vs_ZJ_KEGG_stat.xlsx	Tyrosine metabolism	ko00350	3 out of 23	0.130435	7 out of 90 7.77777777777778%	0.249357	1
GX_vs_ZJ_KEGG_stat.xlsx	Betalain biosynthesis	ko00965	1 out of 23	0.0434783	1 out of 90 1.11111111111111%	0.255556	1
GX_vs_ZJ_KEGG_stat.xlsx	Carbapenem biosynthesis	ko00332	1 out of 23	0.0434783	1 out of 90 1.11111111111111%	0.255556	1
GX_vs_ZJ_KEGG_stat.xlsx	Stilbenoid, diarylheptanoid and gingerol biosynthesis	ko00945	1 out of 23	0.0434783	1 out of 90 1.11111111111111%	0.255556	1
GX_vs_ZJ_KEGG_stat.xlsx	Pantothenate and CoA biosynthesis	ko00770	1 out of 23	0.0434783	3 out of 90 3.33333333333333%	0.592228	1
GX_vs_ZJ_KEGG_stat.xlsx	Biosynthesis of secondary metabolites	ko01110	11 out of 23	0.478261	44 out of 90 48.8888888888889%	0.639976	1
GX_vs_ZJ_KEGG_stat.xlsx	Biosynthesis of various plant secondary metabolites	ko00999	2 out of 23	0.0869565	8 out of 90 8.88888888888889%	0.65782	1
GX_vs_ZJ_KEGG_stat.xlsx	Phenylpropanoid biosynthesis	ko00940	2 out of 23	0.0869565	8 out of 90 8.88888888888889%	0.65782	1
GX_vs_ZJ_KEGG_stat.xlsx	Glycine, serine and threonine metabolism	ko00260	1 out of 23	0.0434783	4 out of 90 4.44444444444444%	0.70003	1
GX_vs_ZJ_KEGG_stat.xlsx	Histidine metabolism	ko00340	1 out of 23	0.0434783	4 out of 90 4.44444444444444%	0.70003	1
GX_vs_ZJ_KEGG_stat.xlsx	Metabolic pathways	ko01100	14 out of 23	0.608696	58 out of 90 64.4444444444444%	0.749656	1
GX_vs_ZJ_KEGG_stat.xlsx	Arginine and proline metabolism	ko00330	1 out of 23	0.0434783	7 out of 90 7.77777777777778%	0.883603	1
HN_vs_JX_KEGG_stat.xlsx	Arginine and proline metabolism	ko00330	5 out of 31	0.16129	7 out of 90 7.77777777777778%	0.0450771	1
HN_vs_JX_KEGG_stat.xlsx	Nicotinate and nicotinamide metabolism	ko00760	2 out of 31	0.0645161	2 out of 90 2.22222222222222%	0.116105	1
HN_vs_JX_KEGG_stat.xlsx	Tyrosine metabolism	ko00350	4 out of 31	0.129032	7 out of 90 7.77777777777778%	0.181986	1
HN_vs_JX_KEGG_stat.xlsx	2-Oxocarboxylic acid metabolism	ko01210	1 out of 31	0.0322581	1 out of 90 1.11111111111111%	0.344444	1
HN_vs_JX_KEGG_stat.xlsx	Carotenoid biosynthesis	ko00906	1 out of 31	0.0322581	1 out of 90 1.11111111111111%	0.344444	1
HN_vs_JX_KEGG_stat.xlsx	Indole alkaloid biosynthesis	ko00901	1 out of 31	0.0322581	1 out of 90 1.11111111111111%	0.344444	1
HN_vs_JX_KEGG_stat.xlsx	Lysine biosynthesis	ko00300	1 out of 31	0.0322581	1 out of 90 1.11111111111111%	0.344444	1
HN_vs_JX_KEGG_stat.xlsx	Penicillin and cephalosporin biosynthesis	ko00311	1 out of 31	0.0322581	1 out of 90 1.11111111111111%	0.344444	1
HN_vs_JX_KEGG_stat.xlsx	Stilbenoid, diarylheptanoid and gingerol biosynthesis	ko00945	1 out of 31	0.0322581	1 out of 90 1.11111111111111%	0.344444	1
HN_vs_JX_KEGG_stat.xlsx	Glycerophospholipid metabolism	ko00564	2 out of 31	0.0645161	4 out of 90 4.44444444444444%	0.427477	1
HN_vs_JX_KEGG_stat.xlsx	Phenylalanine metabolism	ko00360	2 out of 31	0.0645161	5 out of 90 5.55555555555556%	0.56506	1
HN_vs_JX_KEGG_stat.xlsx	Flavonoid biosynthesis	ko00941	4 out of 31	0.129032	11 out of 90 12.2222222222222%	0.56644	1
HN_vs_JX_KEGG_stat.xlsx	Biosynthesis of amino acids	ko01230	1 out of 31	0.0322581	2 out of 90 2.22222222222222%	0.572784	1
HN_vs_JX_KEGG_stat.xlsx	Flavone and flavonol biosynthesis	ko00944	1 out of 31	0.0322581	2 out of 90 2.22222222222222%	0.572784	1
HN_vs_JX_KEGG_stat.xlsx	Lysine degradation	ko00310	1 out of 31	0.0322581	2 out of 90 2.22222222222222%	0.572784	1
HN_vs_JX_KEGG_stat.xlsx	beta-Alanine metabolism	ko00410	1 out of 31	0.0322581	2 out of 90 2.22222222222222%	0.572784	1
HN_vs_JX_KEGG_stat.xlsx	Biosynthesis of various alkaloids	ko00996	1 out of 31	0.0322581	3 out of 90 3.33333333333333%	0.723281	1
HN_vs_JX_KEGG_stat.xlsx	Metabolic pathways	ko01100	19 out of 31	0.612903	58 out of 90 64.4444444444444%	0.754265	1
HN_vs_JX_KEGG_stat.xlsx	Isoquinoline alkaloid biosynthesis	ko00950	2 out of 31	0.0645161	7 out of 90 7.77777777777778%	0.767388	1
HN_vs_JX_KEGG_stat.xlsx	Tryptophan metabolism	ko00380	2 out of 31	0.0645161	7 out of 90 7.77777777777778%	0.767388	1
HN_vs_JX_KEGG_stat.xlsx	Glutathione metabolism	ko00480	1 out of 31	0.0322581	4 out of 90 4.44444444444444%	0.821882	1
HN_vs_JX_KEGG_stat.xlsx	Glycine, serine and threonine metabolism	ko00260	1 out of 31	0.0322581	4 out of 90 4.44444444444444%	0.821882	1
HN_vs_JX_KEGG_stat.xlsx	ABC transporters	ko02010	1 out of 31	0.0322581	5 out of 90 5.55555555555556%	0.886087	1
HN_vs_JX_KEGG_stat.xlsx	Biosynthesis of cofactors	ko01240	1 out of 31	0.0322581	5 out of 90 5.55555555555556%	0.886087	1
HN_vs_JX_KEGG_stat.xlsx	Biosynthesis of secondary metabolites	ko01110	12 out of 31	0.387097	44 out of 90 48.8888888888889%	0.948074	1
HN_vs_JX_KEGG_stat.xlsx	Biosynthesis of various plant secondary metabolites	ko00999	1 out of 31	0.0322581	8 out of 90 8.88888888888889%	0.971393	1
HN_vs_ZJ_KEGG_stat.xlsx	Phenylalanine metabolism	ko00360	3 out of 21	0.142857	5 out of 90 5.55555555555556%	0.0808545	1
HN_vs_ZJ_KEGG_stat.xlsx	Metabolic pathways	ko01100	16 out of 21	0.761905	58 out of 90 64.4444444444444%	0.152823	1
HN_vs_ZJ_KEGG_stat.xlsx	Betalain biosynthesis	ko00965	1 out of 21	0.047619	1 out of 90 1.11111111111111%	0.233333	1
HN_vs_ZJ_KEGG_stat.xlsx	Carbapenem biosynthesis	ko00332	1 out of 21	0.047619	1 out of 90 1.11111111111111%	0.233333	1
HN_vs_ZJ_KEGG_stat.xlsx	Biosynthesis of various plant secondary metabolites	ko00999	3 out of 21	0.142857	8 out of 90 8.88888888888889%	0.27508	1
HN_vs_ZJ_KEGG_stat.xlsx	Tryptophan metabolism	ko00380	2 out of 21	0.0952381	7 out of 90 7.77777777777778%	0.518653	1
HN_vs_ZJ_KEGG_stat.xlsx	Biosynthesis of various alkaloids	ko00996	1 out of 21	0.047619	3 out of 90 3.33333333333333%	0.554018	1
HN_vs_ZJ_KEGG_stat.xlsx	Pantothenate and CoA biosynthesis	ko00770	1 out of 21	0.047619	3 out of 90 3.33333333333333%	0.554018	1
HN_vs_ZJ_KEGG_stat.xlsx	Phenylpropanoid biosynthesis	ko00940	2 out of 21	0.0952381	8 out of 90 8.88888888888889%	0.599844	1
HN_vs_ZJ_KEGG_stat.xlsx	Biosynthesis of secondary metabolites	ko01110	10 out of 21	0.47619	44 out of 90 48.8888888888889%	0.64821	1
HN_vs_ZJ_KEGG_stat.xlsx	Glycerophospholipid metabolism	ko00564	1 out of 21	0.047619	4 out of 90 4.44444444444444%	0.661669	1
HN_vs_ZJ_KEGG_stat.xlsx	Glycine, serine and threonine metabolism	ko00260	1 out of 21	0.047619	4 out of 90 4.44444444444444%	0.661669	1
HN_vs_ZJ_KEGG_stat.xlsx	Biosynthesis of cofactors	ko01240	1 out of 21	0.047619	5 out of 90 5.55555555555556%	0.744284	1
HN_vs_ZJ_KEGG_stat.xlsx	Flavonoid biosynthesis	ko00941	2 out of 21	0.0952381	11 out of 90 12.2222222222222%	0.784532	1
HN_vs_ZJ_KEGG_stat.xlsx	Arginine and proline metabolism	ko00330	1 out of 21	0.047619	7 out of 90 7.77777777777778%	0.855596	1
JX_vs_ZJ_KEGG_stat.xlsx	Nicotinate and nicotinamide metabolism	ko00760	2 out of 34	0.0588235	2 out of 90 2.22222222222222%	0.140075	1
JX_vs_ZJ_KEGG_stat.xlsx	Phenylalanine metabolism	ko00360	3 out of 34	0.0882353	5 out of 90 5.55555555555556%	0.275105	1
JX_vs_ZJ_KEGG_stat.xlsx	Biosynthesis of various plant secondary metabolites	ko00999	4 out of 34	0.117647	8 out of 90 8.88888888888889%	0.350088	1
JX_vs_ZJ_KEGG_stat.xlsx	Phenylpropanoid biosynthesis	ko00940	4 out of 34	0.117647	8 out of 90 8.88888888888889%	0.350088	1
JX_vs_ZJ_KEGG_stat.xlsx	2-Oxocarboxylic acid metabolism	ko01210	1 out of 34	0.0294118	1 out of 90 1.11111111111111%	0.377778	1
JX_vs_ZJ_KEGG_stat.xlsx	Benzoxazinoid biosynthesis	ko00402	1 out of 34	0.0294118	1 out of 90 1.11111111111111%	0.377778	1
JX_vs_ZJ_KEGG_stat.xlsx	Betalain biosynthesis	ko00965	1 out of 34	0.0294118	1 out of 90 1.11111111111111%	0.377778	1
JX_vs_ZJ_KEGG_stat.xlsx	Carbapenem biosynthesis	ko00332	1 out of 34	0.0294118	1 out of 90 1.11111111111111%	0.377778	1
JX_vs_ZJ_KEGG_stat.xlsx	Carotenoid biosynthesis	ko00906	1 out of 34	0.0294118	1 out of 90 1.11111111111111%	0.377778	1
JX_vs_ZJ_KEGG_stat.xlsx	Indole alkaloid biosynthesis	ko00901	1 out of 34	0.0294118	1 out of 90 1.11111111111111%	0.377778	1
JX_vs_ZJ_KEGG_stat.xlsx	Lysine biosynthesis	ko00300	1 out of 34	0.0294118	1 out of 90 1.11111111111111%	0.377778	1
JX_vs_ZJ_KEGG_stat.xlsx	Penicillin and cephalosporin biosynthesis	ko00311	1 out of 34	0.0294118	1 out of 90 1.11111111111111%	0.377778	1
JX_vs_ZJ_KEGG_stat.xlsx	Phenylalanine, tyrosine and tryptophan biosynthesis	ko00400	1 out of 34	0.0294118	1 out of 90 1.11111111111111%	0.377778	1
JX_vs_ZJ_KEGG_stat.xlsx	Stilbenoid, diarylheptanoid and gingerol biosynthesis	ko00945	1 out of 34	0.0294118	1 out of 90 1.11111111111111%	0.377778	1
JX_vs_ZJ_KEGG_stat.xlsx	Flavonoid biosynthesis	ko00941	5 out of 34	0.147059	11 out of 90 12.2222222222222%	0.402344	1
JX_vs_ZJ_KEGG_stat.xlsx	Isoquinoline alkaloid biosynthesis	ko00950	3 out of 34	0.0882353	7 out of 90 7.77777777777778%	0.534388	1
JX_vs_ZJ_KEGG_stat.xlsx	Biosynthesis of amino acids	ko01230	1 out of 34	0.0294118	2 out of 90 2.22222222222222%	0.615481	1
JX_vs_ZJ_KEGG_stat.xlsx	Flavone and flavonol biosynthesis	ko00944	1 out of 34	0.0294118	2 out of 90 2.22222222222222%	0.615481	1
JX_vs_ZJ_KEGG_stat.xlsx	Lysine degradation	ko00310	1 out of 34	0.0294118	2 out of 90 2.22222222222222%	0.615481	1
JX_vs_ZJ_KEGG_stat.xlsx	Biosynthesis of secondary metabolites	ko01110	16 out of 34	0.470588	44 out of 90 48.8888888888889%	0.686979	1
JX_vs_ZJ_KEGG_stat.xlsx	Metabolic pathways	ko01100	21 out of 34	0.617647	58 out of 90 64.4444444444444%	0.740064	1
JX_vs_ZJ_KEGG_stat.xlsx	Pantothenate and CoA biosynthesis	ko00770	1 out of 34	0.0294118	3 out of 90 3.33333333333333%	0.764045	1
JX_vs_ZJ_KEGG_stat.xlsx	Arginine and proline metabolism	ko00330	2 out of 34	0.0588235	7 out of 90 7.77777777777778%	0.821205	1
JX_vs_ZJ_KEGG_stat.xlsx	Tyrosine metabolism	ko00350	2 out of 34	0.0588235	7 out of 90 7.77777777777778%	0.821205	1
JX_vs_ZJ_KEGG_stat.xlsx	Glycerophospholipid metabolism	ko00564	1 out of 34	0.0294118	4 out of 90 4.44444444444444%	0.856257	1
JX_vs_ZJ_KEGG_stat.xlsx	Glycine, serine and threonine metabolism	ko00260	1 out of 34	0.0294118	4 out of 90 4.44444444444444%	0.856257	1
JX_vs_ZJ_KEGG_stat.xlsx	Histidine metabolism	ko00340	1 out of 34	0.0294118	4 out of 90 4.44444444444444%	0.856257	1
SC_vs_GX_KEGG_stat.xlsx	Biosynthesis of secondary metabolites	ko01110	10 out of 16	0.625	44 out of 90 48.8888888888889%	0.177549	1
SC_vs_GX_KEGG_stat.xlsx	Isoflavonoid biosynthesis	ko00943	1 out of 16	0.0625	1 out of 90 1.11111111111111%	0.177778	1
SC_vs_GX_KEGG_stat.xlsx	Metabolic pathways	ko01100	12 out of 16	0.75	58 out of 90 64.4444444444444%	0.250544	1
SC_vs_GX_KEGG_stat.xlsx	Arginine and proline metabolism	ko00330	2 out of 16	0.125	7 out of 90 7.77777777777778%	0.362421	1
SC_vs_GX_KEGG_stat.xlsx	Isoquinoline alkaloid biosynthesis	ko00950	2 out of 16	0.125	7 out of 90 7.77777777777778%	0.362421	1
SC_vs_GX_KEGG_stat.xlsx	Biosynthesis of various plant secondary metabolites	ko00999	2 out of 16	0.125	8 out of 90 8.88888888888889%	0.434117	1
SC_vs_GX_KEGG_stat.xlsx	Biosynthesis of various alkaloids	ko00996	1 out of 16	0.0625	3 out of 90 3.33333333333333%	0.448212	1
SC_vs_GX_KEGG_stat.xlsx	Glycine, serine and threonine metabolism	ko00260	1 out of 16	0.0625	4 out of 90 4.44444444444444%	0.549691	1
SC_vs_GX_KEGG_stat.xlsx	ABC transporters	ko02010	1 out of 16	0.0625	5 out of 90 5.55555555555556%	0.633469	1
SC_vs_GX_KEGG_stat.xlsx	Biosynthesis of cofactors	ko01240	1 out of 16	0.0625	5 out of 90 5.55555555555556%	0.633469	1
SC_vs_GX_KEGG_stat.xlsx	Phenylalanine metabolism	ko00360	1 out of 16	0.0625	5 out of 90 5.55555555555556%	0.633469	1
SC_vs_GX_KEGG_stat.xlsx	Tryptophan metabolism	ko00380	1 out of 16	0.0625	7 out of 90 7.77777777777778%	0.759137	1
SC_vs_GX_KEGG_stat.xlsx	Tyrosine metabolism	ko00350	1 out of 16	0.0625	7 out of 90 7.77777777777778%	0.759137	1
SC_vs_GX_KEGG_stat.xlsx	Phenylpropanoid biosynthesis	ko00940	1 out of 16	0.0625	8 out of 90 8.88888888888889%	0.805568	1
SC_vs_HN_KEGG_stat.xlsx	Nicotinate and nicotinamide metabolism	ko00760	2 out of 25	0.08	2 out of 90 2.22222222222222%	0.0749064	1
SC_vs_HN_KEGG_stat.xlsx	Isoquinoline alkaloid biosynthesis	ko00950	4 out of 25	0.16	7 out of 90 7.77777777777778%	0.0903521	1
SC_vs_HN_KEGG_stat.xlsx	Tyrosine metabolism	ko00350	4 out of 25	0.16	7 out of 90 7.77777777777778%	0.0903521	1
SC_vs_HN_KEGG_stat.xlsx	Biosynthesis of cofactors	ko01240	3 out of 25	0.12	5 out of 90 5.55555555555556%	0.128771	1
SC_vs_HN_KEGG_stat.xlsx	Biosynthesis of secondary metabolites	ko01110	15 out of 25	0.6	44 out of 90 48.8888888888889%	0.141773	1
SC_vs_HN_KEGG_stat.xlsx	Phenylpropanoid biosynthesis	ko00940	4 out of 25	0.16	8 out of 90 8.88888888888889%	0.145596	1
SC_vs_HN_KEGG_stat.xlsx	Betalain biosynthesis	ko00965	1 out of 25	0.04	1 out of 90 1.11111111111111%	0.277778	1
SC_vs_HN_KEGG_stat.xlsx	Folate biosynthesis	ko00790	1 out of 25	0.04	1 out of 90 1.11111111111111%	0.277778	1
SC_vs_HN_KEGG_stat.xlsx	Indole alkaloid biosynthesis	ko00901	1 out of 25	0.04	1 out of 90 1.11111111111111%	0.277778	1
SC_vs_HN_KEGG_stat.xlsx	Isoflavonoid biosynthesis	ko00943	1 out of 25	0.04	1 out of 90 1.11111111111111%	0.277778	1
SC_vs_HN_KEGG_stat.xlsx	Porphyrin metabolism	ko00860	1 out of 25	0.04	1 out of 90 1.11111111111111%	0.277778	1
SC_vs_HN_KEGG_stat.xlsx	Stilbenoid, diarylheptanoid and gingerol biosynthesis	ko00945	1 out of 25	0.04	1 out of 90 1.11111111111111%	0.277778	1
SC_vs_HN_KEGG_stat.xlsx	Ubiquinone and other terpenoid-quinone biosynthesis	ko00130	1 out of 25	0.04	1 out of 90 1.11111111111111%	0.277778	1
SC_vs_HN_KEGG_stat.xlsx	Metabolic pathways	ko01100	16 out of 25	0.64	58 out of 90 64.4444444444444%	0.621567	1
SC_vs_HN_KEGG_stat.xlsx	Biosynthesis of various alkaloids	ko00996	1 out of 25	0.04	3 out of 90 3.33333333333333%	0.628192	1
SC_vs_HN_KEGG_stat.xlsx	Tryptophan metabolism	ko00380	2 out of 25	0.08	7 out of 90 7.77777777777778%	0.630435	1
SC_vs_HN_KEGG_stat.xlsx	Biosynthesis of various plant secondary metabolites	ko00999	2 out of 25	0.08	8 out of 90 8.88888888888889%	0.710353	1
SC_vs_HN_KEGG_stat.xlsx	Glycine, serine and threonine metabolism	ko00260	1 out of 25	0.04	4 out of 90 4.44444444444444%	0.735033	1
SC_vs_HN_KEGG_stat.xlsx	ABC transporters	ko02010	1 out of 25	0.04	5 out of 90 5.55555555555556%	0.812059	1
SC_vs_HN_KEGG_stat.xlsx	Arginine and proline metabolism	ko00330	1 out of 25	0.04	7 out of 90 7.77777777777778%	0.906819	1
SC_vs_JX_KEGG_stat.xlsx	Isoquinoline alkaloid biosynthesis	ko00950	4 out of 28	0.142857	7 out of 90 7.77777777777778%	0.131804	1
SC_vs_JX_KEGG_stat.xlsx	Phenylalanine metabolism	ko00360	3 out of 28	0.107143	5 out of 90 5.55555555555556%	0.172077	1
SC_vs_JX_KEGG_stat.xlsx	2-Oxocarboxylic acid metabolism	ko01210	1 out of 28	0.0357143	1 out of 90 1.11111111111111%	0.311111	1
SC_vs_JX_KEGG_stat.xlsx	Betalain biosynthesis	ko00965	1 out of 28	0.0357143	1 out of 90 1.11111111111111%	0.311111	1
SC_vs_JX_KEGG_stat.xlsx	Carotenoid biosynthesis	ko00906	1 out of 28	0.0357143	1 out of 90 1.11111111111111%	0.311111	1
SC_vs_JX_KEGG_stat.xlsx	Folate biosynthesis	ko00790	1 out of 28	0.0357143	1 out of 90 1.11111111111111%	0.311111	1
SC_vs_JX_KEGG_stat.xlsx	Glycosylphosphatidylinositol (GPI)-anchor biosynthesis	ko00563	1 out of 28	0.0357143	1 out of 90 1.11111111111111%	0.311111	1
SC_vs_JX_KEGG_stat.xlsx	Lysine biosynthesis	ko00300	1 out of 28	0.0357143	1 out of 90 1.11111111111111%	0.311111	1
SC_vs_JX_KEGG_stat.xlsx	Penicillin and cephalosporin biosynthesis	ko00311	1 out of 28	0.0357143	1 out of 90 1.11111111111111%	0.311111	1
SC_vs_JX_KEGG_stat.xlsx	Sphingolipid metabolism	ko00600	1 out of 28	0.0357143	1 out of 90 1.11111111111111%	0.311111	1
SC_vs_JX_KEGG_stat.xlsx	Stilbenoid, diarylheptanoid and gingerol biosynthesis	ko00945	1 out of 28	0.0357143	1 out of 90 1.11111111111111%	0.311111	1
SC_vs_JX_KEGG_stat.xlsx	Ubiquinone and other terpenoid-quinone biosynthesis	ko00130	1 out of 28	0.0357143	1 out of 90 1.11111111111111%	0.311111	1
SC_vs_JX_KEGG_stat.xlsx	Glycerophospholipid metabolism	ko00564	2 out of 28	0.0714286	4 out of 90 4.44444444444444%	0.367247	1
SC_vs_JX_KEGG_stat.xlsx	Biosynthesis of amino acids	ko01230	1 out of 28	0.0357143	2 out of 90 2.22222222222222%	0.52784	1
SC_vs_JX_KEGG_stat.xlsx	Flavone and flavonol biosynthesis	ko00944	1 out of 28	0.0357143	2 out of 90 2.22222222222222%	0.52784	1
SC_vs_JX_KEGG_stat.xlsx	Lysine degradation	ko00310	1 out of 28	0.0357143	2 out of 90 2.22222222222222%	0.52784	1
SC_vs_JX_KEGG_stat.xlsx	beta-Alanine metabolism	ko00410	1 out of 28	0.0357143	2 out of 90 2.22222222222222%	0.52784	1
SC_vs_JX_KEGG_stat.xlsx	Metabolic pathways	ko01100	18 out of 28	0.642857	58 out of 90 64.4444444444444%	0.605162	1
SC_vs_JX_KEGG_stat.xlsx	Biosynthesis of various alkaloids	ko00996	1 out of 28	0.0357143	3 out of 90 3.33333333333333%	0.678073	1
SC_vs_JX_KEGG_stat.xlsx	Arginine and proline metabolism	ko00330	2 out of 28	0.0714286	7 out of 90 7.77777777777778%	0.703792	1
SC_vs_JX_KEGG_stat.xlsx	Biosynthesis of secondary metabolites	ko01110	13 out of 28	0.464286	44 out of 90 48.8888888888889%	0.70554	1
SC_vs_JX_KEGG_stat.xlsx	Flavonoid biosynthesis	ko00941	3 out of 28	0.107143	11 out of 90 12.2222222222222%	0.731109	1
SC_vs_JX_KEGG_stat.xlsx	Glutathione metabolism	ko00480	1 out of 28	0.0357143	4 out of 90 4.44444444444444%	0.781682	1
SC_vs_JX_KEGG_stat.xlsx	ABC transporters	ko02010	1 out of 28	0.0357143	5 out of 90 5.55555555555556%	0.852762	1
SC_vs_JX_KEGG_stat.xlsx	Biosynthesis of cofactors	ko01240	1 out of 28	0.0357143	5 out of 90 5.55555555555556%	0.852762	1
SC_vs_JX_KEGG_stat.xlsx	Biosynthesis of various plant secondary metabolites	ko00999	1 out of 28	0.0357143	8 out of 90 8.88888888888889%	0.956382	1
SC_vs_ZJ_KEGG_stat.xlsx	Nicotinate and nicotinamide metabolism	ko00760	2 out of 31	0.0645161	2 out of 90 2.22222222222222%	0.116105	1
SC_vs_ZJ_KEGG_stat.xlsx	Flavonoid biosynthesis	ko00941	5 out of 31	0.16129	11 out of 90 12.2222222222222%	0.308434	1
SC_vs_ZJ_KEGG_stat.xlsx	Benzoxazinoid biosynthesis	ko00402	1 out of 31	0.0322581	1 out of 90 1.11111111111111%	0.344444	1
SC_vs_ZJ_KEGG_stat.xlsx	Betalain biosynthesis	ko00965	1 out of 31	0.0322581	1 out of 90 1.11111111111111%	0.344444	1
SC_vs_ZJ_KEGG_stat.xlsx	Glycosylphosphatidylinositol (GPI)-anchor biosynthesis	ko00563	1 out of 31	0.0322581	1 out of 90 1.11111111111111%	0.344444	1
SC_vs_ZJ_KEGG_stat.xlsx	Indole alkaloid biosynthesis	ko00901	1 out of 31	0.0322581	1 out of 90 1.11111111111111%	0.344444	1
SC_vs_ZJ_KEGG_stat.xlsx	Phenylalanine, tyrosine and tryptophan biosynthesis	ko00400	1 out of 31	0.0322581	1 out of 90 1.11111111111111%	0.344444	1
SC_vs_ZJ_KEGG_stat.xlsx	Sphingolipid metabolism	ko00600	1 out of 31	0.0322581	1 out of 90 1.11111111111111%	0.344444	1
SC_vs_ZJ_KEGG_stat.xlsx	Stilbenoid, diarylheptanoid and gingerol biosynthesis	ko00945	1 out of 31	0.0322581	1 out of 90 1.11111111111111%	0.344444	1
SC_vs_ZJ_KEGG_stat.xlsx	Metabolic pathways	ko01100	21 out of 31	0.677419	58 out of 90 64.4444444444444%	0.407148	1
SC_vs_ZJ_KEGG_stat.xlsx	Glycerophospholipid metabolism	ko00564	2 out of 31	0.0645161	4 out of 90 4.44444444444444%	0.427477	1
SC_vs_ZJ_KEGG_stat.xlsx	Isoquinoline alkaloid biosynthesis	ko00950	3 out of 31	0.0967742	7 out of 90 7.77777777777778%	0.455803	1
SC_vs_ZJ_KEGG_stat.xlsx	Tyrosine metabolism	ko00350	3 out of 31	0.0967742	7 out of 90 7.77777777777778%	0.455803	1
SC_vs_ZJ_KEGG_stat.xlsx	Biosynthesis of various plant secondary metabolites	ko00999	3 out of 31	0.0967742	8 out of 90 8.88888888888889%	0.56467	1
SC_vs_ZJ_KEGG_stat.xlsx	Phenylpropanoid biosynthesis	ko00940	3 out of 31	0.0967742	8 out of 90 8.88888888888889%	0.56467	1
SC_vs_ZJ_KEGG_stat.xlsx	Biosynthesis of various alkaloids	ko00996	1 out of 31	0.0322581	3 out of 90 3.33333333333333%	0.723281	1
SC_vs_ZJ_KEGG_stat.xlsx	Tropane, piperidine and pyridine alkaloid biosynthesis	ko00960	1 out of 31	0.0322581	3 out of 90 3.33333333333333%	0.723281	1
SC_vs_ZJ_KEGG_stat.xlsx	Arginine and proline metabolism	ko00330	2 out of 31	0.0645161	7 out of 90 7.77777777777778%	0.767388	1
SC_vs_ZJ_KEGG_stat.xlsx	Glycine, serine and threonine metabolism	ko00260	1 out of 31	0.0322581	4 out of 90 4.44444444444444%	0.821882	1
SC_vs_ZJ_KEGG_stat.xlsx	Histidine metabolism	ko00340	1 out of 31	0.0322581	4 out of 90 4.44444444444444%	0.821882	1
SC_vs_ZJ_KEGG_stat.xlsx	Biosynthesis of secondary metabolites	ko01110	13 out of 31	0.419355	44 out of 90 48.8888888888889%	0.880824	1
SC_vs_ZJ_KEGG_stat.xlsx	Phenylalanine metabolism	ko00360	1 out of 31	0.0322581	5 out of 90 5.55555555555556%	0.886087	1

## Sheet: Table S4
Table S4: Differentially Enriched Genes
ID	ZJ-1_fpkm	ZJ-2_fpkm	ZJ-3_fpkm	JX-1_fpkm	JX-2_fpkm	JX-3_fpkm	HN-1_fpkm	HN-2_fpkm	HN-3_fpkm	GX-1_fpkm	GX-2_fpkm	GX-3_fpkm	SC-1_fpkm	SC-2_fpkm	SC-3_fpkm	ZJ-1_count	ZJ-2_count	ZJ-3_count	JX-1_count	JX-2_count	JX-3_count	HN-1_count	HN-2_count	HN-3_count	GX-1_count	GX-2_count	GX-3_count	SC-1_count	SC-2_count	SC-3_count	SC_vs_HN_log2FoldChange	SC_vs_HN_pvalue	SC_vs_HN_padj	SC_vs_HN_regulated	GX_vs_HN_log2FoldChange	GX_vs_HN_pvalue	GX_vs_HN_padj	GX_vs_HN_regulated	SC_vs_JX_log2FoldChange	SC_vs_JX_pvalue	SC_vs_JX_padj	SC_vs_JX_regulated	SC_vs_GX_log2FoldChange	SC_vs_GX_pvalue	SC_vs_GX_padj	SC_vs_GX_regulated	GX_vs_JX_log2FoldChange	GX_vs_JX_pvalue	GX_vs_JX_padj
Cluster-1000.0	4.89	1.57	3.84	0	0	0	0	0	0	0	0	0	0	0	0	65	18	49	0	0	0	0	0	0	0	0	0	0	0	0	NA	NA	NA	NA	NA	NA	NA	NA	NA	NA	NA	NA	NA	NA	NA	NA	NA	NA	NA
Cluster-1002.0	10.16	6.43	7.49	0	0	0	0	0	0	0	0	0	0	0	0	90	49	63	0	0	0	0	0	0	0	0	0	0	0	0	NA	NA	NA	NA	NA	NA	NA	NA	NA	NA	NA	NA	NA	NA	NA	NA	NA	NA	NA
Cluster-10028.0	3.38	2.72	2.26	0	0	0	0	0.07	0.83	0	0	0	0	0	0	59	41	38	0	0	0	0	1	14	0	0	0	0	0	0	NA	NA	NA	NA	NA	NA	NA	NA	NA	NA	NA	NA	NA	NA	NA	NA	NA	NA	NA
Cluster-10033.6	2.07	2.02	2.24	0	0	0	0.26	0	0	0	0	0	0.3	0.15	0	22	17	22	0	0	0	2	0	0	0	0	0	3	1	0	NA	NA	NA	NA	NA	NA	NA	NA	NA	NA	NA	NA	NA	NA	NA	NA	NA	NA	NA
Cluster-10035.0	0	0	0	0	0	0	0	3.17	1.65	0	0	0	4	4.39	4.83	0	0	0	0	0	0	0	15	9	0	0	0	26	28	30	1.76342	0.160534	0.281354	FALSE	NA	NA	NA	NA	7.34389	1.3265e-07	6.5454e-07	up	7.06899	9.13141e-07	8.34342e-06	up	NA	NA	NA
Cluster-10043.1	0.34	0.61	0.24	0.64	0.31	0.44	0.43	0	0	2.09	3.02	2.85	3.89	3.84	3.78	9	14	6	14	7	11	10	0	0	55	78	74	118	113	110	5.23756	4.19085e-05	0.00027406	up	4.67519	0.000102212	0.00103181	up	3.49333	1.09746e-16	2.57898e-15	up	0.533811	0.0441956	0.105472	FALSE	2.95765	8e-09	8.37336e-08
Cluster-10043.10	0	0	0	0	0	0	14.63	17.95	16.33	0	0	0	0	0	0	0	0	0	0	0	0	465	572	586	0	0	0	0	0	0	-11.5122	8.4996e-21	1.35887e-18	down	-11.3398	1.07111e-20	3.80244e-18	down	NA	NA	NA	NA	NA	NA	NA	NA	NA	NA	NA
Cluster-10043.4	0.23	0.14	0.14	0	0.34	0.17	5.38	0.91	1.52	2.8	1.82	1.88	6.67	9.23	9.18	4	2	2	0	5	2	80	13	25	46	29	30	127	172	168	2.1006	0.00213544	0.00855437	up	0.11179	0.876024	0.942407	FALSE	6.17131	2.741e-18	8.37733e-17	up	1.97077	6.7113e-07	6.34972e-06	up	4.21601	2.29973e-05	0.000109796
Cluster-10043.5	0	0.08	0	0.21	0	0	1.95	0.66	1.4	0.32	1.42	0	1.52	1.35	1.44	0	1	0	3	0	0	36	12	29	6	28	0	36	31	32	0.414502	0.466887	0.612538	FALSE	-0.961515	0.457048	0.672797	FALSE	5.10183	5.54638e-06	2.00942e-05	up	1.35526	0.308309	0.467456	FALSE	NA	NA	NA
Cluster-10043.6	0.04	0	0	0	0	0	3.78	0.7	2.29	3.04	6.1	1.34	0.88	1.77	2.04	1	0	0	0	0	0	102	18	70	92	181	39	30	59	67	-0.174204	0.816895	0.88697	FALSE	0.959998	0.209865	0.415425	FALSE	8.26126	3.04031e-09	2.04861e-08	up	-1.15806	0.10045	0.20234	FALSE	9.42091	1.44041e-10	2.14135e-09
Cluster-10043.7	0.29	0.1	0.3	0.27	0.62	0.24	0	0	0	4.75	7.71	3.13	2.83	3.03	2.95	10	2	10	7	20	7	0	0	0	158	253	102	107	112	108	9.23979	3.00473e-13	1.26146e-11	up	10.0564	8.21064e-15	9.61321e-13	up	3.36344	6.70901e-11	6.00147e-10	up	-0.836652	0.0454271	0.107769	FALSE	4.20385	4.46413e-11	7.40632e-10
Cluster-10043.8	0	0	0	0	0	0	0.2	2.3	1.72	0	0	0.07	0	0	0	0	0	0	0	0	0	5	58	49	0	0	2	0	0	0	-7.71143	4.49478e-05	0.000291406	down	-5.69509	0.000304771	0.0026286	down	NA	NA	NA	NA	NA	NA	NA	NA	NA	NA	NA
Cluster-10043.9	0	0	0.05	0	0.07	0	16.58	0	0	0.74	2.2	1.32	5.03	4.33	3.12	0	0	1	0	2	0	523	0	0	25	75	45	201	169	120	0.0705571	1	1	FALSE	-1.51547	1	1	FALSE	8.00931	1.69101e-13	2.37151e-12	up	1.56003	0.000968132	0.00425245	up	6.45545	1.07552e-06	7.07242e-06
Cluster-10052.0	0	0	0	0	0	0.17	0	4.85	4.1	0	0	0	0	0	0	0	0	0	0	0	2	0	50	48	0	0	0	0	0	0	-7.52726	0.00662852	0.0221274	down	-7.35325	0.00258231	0.0156825	down	NA	NA	NA	NA	NA	NA	NA	NA	NA	NA	NA
Cluster-10054.0	8.2	8.02	9.6	24.87	15.05	10.33	0	2.56	0	0	0	0	0	0	0	37	31	40	73	51	35	0	9	0	0	0	0	0	0	0	NA	NA	NA	NA	NA	NA	NA	NA	-8.10414	3.60217e-09	2.38785e-08	down	NA	NA	NA	NA	-7.91107	3.33648e-08	3.07016e-07
Cluster-10061.1	5.36	9.52	6.33	9.96	21.03	14.76	0	14.47	7.38	1.48	7.64	3.2	0	0	0	30	45	33	44	106	76	0	64	38	7	38	16	0	0	0	-7.59245	0.00616326	0.0208437	down	-0.647923	0.651761	0.817107	FALSE	-8.57647	1.22206e-10	1.04505e-09	down	NA	NA	NA	NA	-1.61088	0.0316548	0.0685265
[truncated: 60,584 more rows]
[truncated: 33 more columns]

## Sheet: Table S5
Table S5: DEG KEGG summary
[truncated: 1,444 more rows]

## Sheet: Table S6
Table S6: Combined KEGG pathways
[truncated: 202 more rows]

## Sheet: Table S7
Table S7: Combined KEGG enrichment analysis
[truncated: 202 more rows]

[truncated: 1 more sheets: Table S8]
